# Supplementary material
Source: Research Square preprint supplement (doi:10.21203/rs.3.rs-9610408/v1)
Supplement: Supplementary file 1 [file 7383523b982225046e4f220f.xlsx]

## Sheet: Table S1
Supplementary Table S1. Oligonucleotide primers used in this study.
Identification of invertible genomic element
Primer	Sequence	Purpose
Uni	atctctgcacaaacttgatc	Amplification of genomic DNA from all four phage isolates
P1	aaagccgttgaaggcaac
P2	acggttgattatttcttggtat
qRT-PCR
rnpB RT-F	gcgattatctatctggga	Internal standard
rnpB RT-R	caactcttggtaagggtg
phoD17120 RT-F	cgggagcatttactggtt	qRT-PCR for Ana7120
phoD17120 RT-R	aaacgagtccagatgaca
phoD27120 RT-F	aaaagcgactatgacagg
phoD27120 RT-R	tcaagagccgattacgag
phoDHlh1 RT-F	gtttactttcggtcgctt	qRT-PCR for A-Hlh1
phoDHlh1 RT-R	gatgggcttttctttacg
nf1 RT-F	cacctgattgggaagaaa
nf1 RT-R	atacaagcatcatcggta
nf2 RT-F	tagactgtagcgtttgcc
nf2 RT-R	gtctgaagcgttagttgc
nf2’ RT-F	atgtttccgccgctatta
nf2’ RT-R	gtggtgcaggtgacgcta
nf3 RT-F	gacgctggttgaaataga
nf3 RT-R	agccagttacgaaagaaa
nf1 RT-F	ttgagacgaaacacccac	qRT-PCR for A-1(L)
nf1 RT-R	atcgcaaacatacaagca
nf2 RT-F	tcaaaccagtgcgtccag
nf2 RT-R	gcaggcgacttcgtaaat
nf3 RT-F	cgaaagcgttaggattgg
nf3 RT-R	gcggtagcacctagtgga
tpnBfwd RT-F	aagagggtgcgggttgtg
tpnBfwd RT-R	tgccttcgctatcggtca
tpnBrev RT-F	taacgacggtcactactaag
tpnBrev RT-R	aaactcaactctatggctc
primase RT-F	gtgcctgaaaacgggtta	qRT-PCR for A-1(L), A-Lf14, A-Alj1 and A -Hlh1
primase RT-R	gttagcggtcgtttgacg
neck fiber2 RT-F	ccagtgttttcaccctgtaa
neck fiber2 RT-R	gtatcggtgcagcaacaaaa
HTH RT-F	tgaacgaattaccaccgaaa	qRT-PCR for A-1(L)
HTH RT-R	aaaacttgtgtcacatgg
HTH RT-F	tgaacgaattgcccccaaaa	qRT-PCR for A-Lf14, A-Alj1 and A -Hlh1
HTH RT-R	taaatggactgtatggcatg
tail fiber RT-F	cgtttgttgacggacagga	qRT-PCR for A-1(L)
tail fiber RT-R	actgatactaccctgagtg
tail fiber RT-F	ccgtttgttgatggtcagga	qRT-PCR for A-Lf14, A-Alj1 and A -Hlh1
tail fiber RT-R	gctgatactaccttgtgtga

## Sheet: Table S2
Supplementary Table S2. Sampling site information and physicochemical parameters of freshwater environments used for cyanophage isolation.
Sample codes	Sites	GPS data (N/E)	Sample description	pH	Temperature (°C)	Conductivity (μS/cm)
S1	Wdlc001	48°42′15″/126°11′55″	Sediment, floating wood, stones, plankton	7.99	24.3	373
S2	Wdlc002	48°42′07″/126°11′48″	Wet soil, plankton, sediment	8.8	25.3	202
S3	Wdlc003	48°38′57″/126°07′52″	Sediment, benthic sample, plankton	6.8	6.5	232
S4	Wdlc004	48°38′50″/126°08′48″	Sediment, plankton	8.47	24	1300
S5	Wdlc005	48°38′50″/126°08′50″	Cliff wall, benthic sample, pond sediment, iron oxide deposits	6	10	1300
S6	Wdlc006	48°38′49″/126°08′57″	Soil	-	-	-
S7	Wdlc007	48°39′08″/126°08′51″	Well wall, water sample	5.8	8.5	2300
S8	Wdlc008	48°39′19″/126°09′00″	Soil	-	-	-
S9	Wdlc009	48°39′13″/126°08′49″	Plankton, water sample, wet soil	9.9	25.7	573
S10	Wdlc010	48°44′34″/126°10′58″	Soil, plankton	9.8	27	610
S11	Lf11	46°31′38″/125°08′21″	Water sample, sediment	8.48	25.2	2776
S12	Lf12	46°30′10″/125°13′59″	Wet soil, water sample	8.05	28	6300
S13	Lf13	46°29′20″/125°12′54″	Plankton, wet soil	8.5	26.9	2785
S14	Lf14	46°28′51″/125°09′55″	Plankton, wet soil	8.51	28.9	1072
S15	Lf15	46°30′06″/125°10′15″	Water sample, benthic sample	7.96	25.4	763
S16	Dq16	46°34′42″/125°04′21″	Dry soil, surface crust	-	-	-
S17	Dq17	46°39′53″/125°06′31″	Dry soil	-	-	-
S18	Dq18	46°37′41″/125°06′32″	Plankton, wet soil	8.41	28.8	1258
S19	Jhw1	45°46′48″/126°29′24″	Sediment, benthic sample, plankton	-	-	-
S20	Djy1	45°48′36″/126°34′48″	Sediment, benthic sample, plankton	-	-	-
S21	Qlwt1	45°45′36″/126°32′24″	Sediment, benthic sample, plankton	-	-	-
S22	Bj1	45°52′12″/126°45′36″	Sediment, benthic sample, plankton	-	-	-
S23	Alj1	45°48′00″/126°37′48″	Sediment, benthic sample, plankton	-	-	-
S24	Alj2	45°48′36″/126°39′00″	Sediment, benthic sample, plankton	-	-	-
S25	Alj3	45°08′52″/126°42′35″	Sediment, benthic sample, plankton	-	-	-
S26	Byp1	45°54′00″/126°54′36″	Sediment, benthic sample, plankton	-	-	-
S27	Byp2		Sediment, benthic sample, plankton	-	-	-
S28	Byp3		Sediment, benthic sample, plankton	-	-	-
S29	Byp4		Sediment, benthic sample, plankton	-	-	-
S30	Hlh1	46°58′48″/126°48′00″	Sediment, benthic sample, plankton	-	-	-
S31	Hlh2	45°57′00″/127°43′48″	Sediment, benthic sample, plankton	-	-	-
S32	Hlh3	45°56′24″/126°42′35″	Sediment, benthic sample, plankton	-	-	-
S33	Hlh4	45°56′49″/126°41′47″	Sediment, benthic sample, plankton	-	-	-
S34	Ash1	45°45′00″/126°47′24″	Sediment, benthic sample, plankton	-	-	-
S35	Ash2	45°45′36″/126°46′48″	Sediment, benthic sample, plankton	-	-	-
S36	Xyg1	45°49′11″/126°46′58″	Sediment, benthic sample, plankton	-	-	-

## Sheet: Table S3
Supplementary Table S3. Genomic sequence comparison between current and previous A-1(L) genomes and confirmation by Sanger sequencing.
Sites	Genomic Location (Present Study)	Nucleotide Sequence (Present Study)	CDS?	Nucleotide Sequences (Yu, et al)	Nucleotide Sequences (Chénard, et al)	Sanger Sequencing (Proportion of Allele)		Representative Chromatogram	Validation Conclusion
						Allele 1	Allele 2
1	13,039-13,056	tttttttaatcttttcta	Y	tttttttaatcttttcta	ttttttaatcttttcta	tttttttaatcttttcta (100%)	ttttttaatcttttctaa		Monomorphic
2	15,217-15,234	ttttttttcaaatactca	Y	ttttttttcaaatactca	tttttttcaaatactca	ttttttttcaaatactca (100%)	tttttttcaaatactca		Monomorphic
3	19,554-19,571	tgtaacgtggaaagtgta	N	tgtaacgcgaaaagtgta	tgtaacgtggaaagtgta	tgtaacgtggaaagtgta (67%)	tgtaacgcgaaaagtgta (33%)		Polymorphic
4	19,663-19,680	tttccccccggagtcatt	N	tttcccccccggagtcat	tttcccccccggagtcat	tttccccccggagtcatt (25%)	tttcccccccggagtcat (75%)		Polymorphic
5	23,416-23,443	tttttttattggatgtaa	Y	tttttttattggatgtaa	ttttttattggatgtaaa	tttttttattggatgtaa (100%)	ttttttattggatgtaaa		Monomorphic
6	26,455-26,472	tttatttgctttatgggg	Y	tttatttgttttatgggg	tttatttgctttatgggg	tttatttgctttatgggg (100%)	tttatttgttttatgggg		Monomorphic
7	27,242-27,259	cacagtggatagataaaa	Y	cacagtggatagataaaa	cacagtgganntagataaaa	cacagtggatagataaaa (100%)	cacagtgganntagataaaa		Monomorphic
8	45,014-45,031	aaaaaaaaaaactccgag	N	aaaaaaaaaaactccgag	aaaaaaaaaaactccgag	aaaaaaaaaaactccgag (100%)	aaaaaaaaaaactccgag		Monomorphic
9	52,007-52,024	acactttccacgttacaaa	N	acacttttcgcgttaca	acacttttcgcgttacaa	acactttccacgttacaaa (62%)	acacttttcgcgttacaa(38%)		Polymorphic
10	52,515-52,532	ccctatgcaggtactttc	Y	ccctatgcaggtactttc	ccctatgcaggtactttcatcgtttttacgtcgttcaaaattcatagaaacgaaaattcatttttgtacttagtgtactgatacgtatacttatatactatgtatatttatactattaagtatttaagtatatatatttcatctatatatttaactataaaaacgtaacattgtaacaaaaacggctagaaccctttccctatctagatttcagcgaattacaaatccgttacaacctgttacgtttttgaaatttgtaacgttacggtttttgggctaaacgccccggagtcagtcacagcaacggttccacgctgttacatttttgcgttacaaatttctgccaaaatgtaacgccgatttgtaacgctgtgatattctgataaaaactttggagaa…	ccctatgcaggtactttc (100%)	ccctatgcaggtactttcatcgtttttacgtcgttcaaaattcatagaaacgaaaattcatttttgtacttagtgtactgatacgtatacttatatactatgtatatttatactattaagtatttaagtatatatatttcatctatatatttaactataaaaacgtaacattgtaacaaaaacggctagaaccctttccctatctagatttcagcgaattacaaatccgttacaacctgttacgtttttgaaatttgtaacgttacggtttttgggctaaacgccccggagtcagtcacagcaacggttccacgctgttacatttttgcgttacaaatttctgccaaaatgtaacgccgatttgtaacgctgtgatattctgataaaaactttggagaa…		Monomorphic
11	57,519-57,536	tttttttttatttttaga	N	tttttttttatttttaga	ttttttttatttttaga	tttttttttatttttaga (100%)	ttttttttatttttaga		Monomorphic
12	59,803-59,820	ttttttttttaggtattg	N	ttttttttttaggtattg	tttttttttaggtattg	ttttttttttaggtattg (100%)	tttttttttaggtattg		Monomorphic

## Sheet: Table S4
Supplementary Table S4. Comparison of functional genes between A-1(L) and the new cyanophage isolates.
Functional proteins	Cyanophages
	A-1(L)	A-Lf14	A-Alj1	A-Hlh1
NarL/FixJ family transcription factor	Y
Putative antirepressor	Y
Transposase (TnpB)	Y
MAG TPA: restriction enzyme		Y		Y
MAG: antirepressor protein KilAC domain protein		Y	Y
Phosphatase (PhoD)		Y	Y	Y
Neck fiber protein 2'		Y	Y	Y

## Sheet:  Table S5
Supplementary Table S5. Cyanophages used for PhyloTreeVIP analysis.
name	id	tax	tax_name	lineage	order	family	genus	species	strain	host	host_id	host_lineage	host_order	host_family	host_genus	host_species	host_strain	host_info_origin
OP053362	2316772231	1137744	Cyanophage S-TIM54	1137744 2788035 2733093 2731619 2731618 2731360 2731341 10239	NA	NA	Aurunvirus	Cyanophage S-TIM54	NA	Parasynechococcus marenigrum WH 8102	84588	84588 2881428 2881427 2881426 1890424 3028117 1117 1798711 1783272 2 131567	Synechococcales	Prochlorococcaceae	Parasynechococcus	Parasynechococcus marenigrum	Parasynechococcus marenigrum WH 8102	Virus-Host database
OP053360	2316771807	2969442	Cyanophage S-TIM66	2969442 2788035 2733093 2731619 2731618 2731360 2731341 10239	NA	NA	Aurunvirus	Cyanophage S-TIM66	NA	Synechococcus sp. CC9605	110662	110662 2626047 1129 1890426 1890424 3028117 1117 1798711 1783272 2 131567	Synechococcales	Synechococcaceae	Synechococcus	Synechococcus sp. CC9605	NA	Virus-Host database
OP053361	2316772021	2969441	Cyanophage S-TIM61	2969441 2788035 2733093 2731619 2731618 2731360 2731341 10239	NA	NA	Aurunvirus	Cyanophage S-TIM61	NA	Synechococcus sp. CC9605	110662	110662 2626047 1129 1890426 1890424 3028117 1117 1798711 1783272 2 131567	Synechococcales	Synechococcaceae	Synechococcus	Synechococcus sp. CC9605	NA	Virus-Host database
NC_019516	2275413904	1137745	Cyanophage S-TIM5	1137745 2734088 2733093 2731619 2731618 2731360 2731341 10239	NA	NA	Aurunvirus	Aurunvirus STIM5	NA	Parasynechococcus marenigrum WH 8102	84588	84588 2881428 2881427 2881426 1890424 3028117 1117 1798711 1783272 2 131567	Synechococcales	Prochlorococcaceae	Parasynechococcus	Parasynechococcus marenigrum	Parasynechococcus marenigrum WH 8102	Virus-Host database
MT234670	1829640030	2723892	Pseudanabaena phage PA-SR01	2723892 2788787 2731619 2731618 2731360 2731341 10239	NA	NA	NA	Pseudanabaena phage PA-SR01	NA	Pseudanabaena sp. KCZY-C8	1152	1152 1890436 2881377 3028117 1117 1798711 1783272 2 131567	Pseudanabaenales	Pseudanabaenaceae	Pseudanabaena	NA	NA	Virus-Host database
ON014754	2239985940	2936518	Pseudanabaena phage Pam2	2936518 2788787 2731619 2731618 2731360 2731341 10239	NA	NA	NA	Pseudanabaena phage Pam2	NA	Pseudanabaena sp.	1153	1153 2593292 1152 1890436 2881377 3028117 1117 1798711 1783272 2 131567	Pseudanabaenales	Pseudanabaenaceae	Pseudanabaena	Pseudanabaena sp.	NA	Virus-Host database
OQ540924	2552392116	3038219	Nostoc phage NMeng1	3038219 2788057 2731928 2731643 2731619 2731618 2731360 2731341 10239	NA	Autographiviridae	Atuphduovirus	Nostoc phage NMeng1	NA	Nostoc sp.	1180	1180 2593658 1177 1162 1161 3028117 1117 1798711 1783272 2 131567	Nostocales	Nostocaceae	Nostoc	Nostoc sp.	NA	Virus-Host database
OM416780	2196272658	2914506	Prochlorococcus phage P-SCSP2	2914506 2731990 2731643 2731619 2731618 2731360 2731341 10239	NA	Autographiviridae	NA	Prochlorococcus phage P-SCSP2	NA	Prochlorococcus marinus subsp. pastoris str. CCMP1986	59919	59919 142479 1219 1218 2881426 1890424 3028117 1117 1798711 1783272 2 131567	Synechococcales	Prochlorococcaceae	Prochlorococcus	Prochlorococcus marinus	Prochlorococcus marinus subsp. pastoris str. CCMP1986	Virus-Host database
OM416765	2196272063	2914491	Prochlorococcus phage P-SCSP1c	2914491 2731990 2731643 2731619 2731618 2731360 2731341 10239	NA	Autographiviridae	NA	Prochlorococcus phage P-SCSP1c	NA	Prochlorococcus sp. MED4	1218	1218 2881426 1890424 3028117 1117 1798711 1783272 2 131567	Synechococcales	Prochlorococcaceae	Prochlorococcus	NA	NA	Virus-Host database
OM416763	2196271985	2914489	Prochlorococcus phage P-SCSP1a	2914489 2731990 2731643 2731619 2731618 2731360 2731341 10239	NA	Autographiviridae	NA	Prochlorococcus phage P-SCSP1a	NA	Prochlorococcus sp. MED4	1218	1218 2881426 1890424 3028117 1117 1798711 1783272 2 131567	Synechococcales	Prochlorococcaceae	Prochlorococcus	NA	NA	Virus-Host database
OM416771	2196272300	2914497	Prochlorococcus phage P-SCSP1k	2914497 2731990 2731643 2731619 2731618 2731360 2731341 10239	NA	Autographiviridae	NA	Prochlorococcus phage P-SCSP1k	NA	Prochlorococcus sp. MED4	1218	1218 2881426 1890424 3028117 1117 1798711 1783272 2 131567	Synechococcales	Prochlorococcaceae	Prochlorococcus	NA	NA	Virus-Host database
OM416769	2196272218	2914495	Prochlorococcus phage P-SCSP1h	2914495 2731990 2731643 2731619 2731618 2731360 2731341 10239	NA	Autographiviridae	NA	Prochlorococcus phage P-SCSP1h	NA	Prochlorococcus sp. MED4	1218	1218 2881426 1890424 3028117 1117 1798711 1783272 2 131567	Synechococcales	Prochlorococcaceae	Prochlorococcus	NA	NA	Virus-Host database
OM416770	2196272259	2914496	Prochlorococcus phage P-SCSP1i	2914496 2731990 2731643 2731619 2731618 2731360 2731341 10239	NA	Autographiviridae	NA	Prochlorococcus phage P-SCSP1i	NA	Prochlorococcus sp. MED4	1218	1218 2881426 1890424 3028117 1117 1798711 1783272 2 131567	Synechococcales	Prochlorococcaceae	Prochlorococcus	NA	NA	Virus-Host database
OM416768	2196272177	2914494	Prochlorococcus phage P-SCSP1g	2914494 2731990 2731643 2731619 2731618 2731360 2731341 10239	NA	Autographiviridae	NA	Prochlorococcus phage P-SCSP1g	NA	Prochlorococcus sp. MED4	1218	1218 2881426 1890424 3028117 1117 1798711 1783272 2 131567	Synechococcales	Prochlorococcaceae	Prochlorococcus	NA	NA	Virus-Host database
OM416764	2196272022	2914490	Prochlorococcus phage P-SCSP1b	2914490 2731990 2731643 2731619 2731618 2731360 2731341 10239	NA	Autographiviridae	NA	Prochlorococcus phage P-SCSP1b	NA	Prochlorococcus sp. MED4	1218	1218 2881426 1890424 3028117 1117 1798711 1783272 2 131567	Synechococcales	Prochlorococcaceae	Prochlorococcus	NA	NA	Virus-Host database
OM416774	2196272420	2914500	Prochlorococcus phage P-SCSP1n	2914500 2731990 2731643 2731619 2731618 2731360 2731341 10239	NA	Autographiviridae	NA	Prochlorococcus phage P-SCSP1n	NA	Prochlorococcus sp. MED4	1218	1218 2881426 1890424 3028117 1117 1798711 1783272 2 131567	Synechococcales	Prochlorococcaceae	Prochlorococcus	NA	NA	Virus-Host database
OM416773	2196272379	2914499	Prochlorococcus phage P-SCSP1m	2914499 2731990 2731643 2731619 2731618 2731360 2731341 10239	NA	Autographiviridae	NA	Prochlorococcus phage P-SCSP1m	NA	Prochlorococcus sp. MED4	1218	1218 2881426 1890424 3028117 1117 1798711 1783272 2 131567	Synechococcales	Prochlorococcaceae	Prochlorococcus	NA	NA	Virus-Host database
OM416772	2196272338	2914498	Prochlorococcus phage P-SCSP1l	2914498 2731990 2731643 2731619 2731618 2731360 2731341 10239	NA	Autographiviridae	NA	Prochlorococcus phage P-SCSP1l	NA	Prochlorococcus sp. MED4	1218	1218 2881426 1890424 3028117 1117 1798711 1783272 2 131567	Synechococcales	Prochlorococcaceae	Prochlorococcus	NA	NA	Virus-Host database
OM416775	2196272461	2914501	Prochlorococcus phage P-SCSP1o	2914501 2731990 2731643 2731619 2731618 2731360 2731341 10239	NA	Autographiviridae	NA	Prochlorococcus phage P-SCSP1o	NA	Prochlorococcus sp. MED4	1218	1218 2881426 1890424 3028117 1117 1798711 1783272 2 131567	Synechococcales	Prochlorococcaceae	Prochlorococcus	NA	NA	Virus-Host database
OM416777	2196272538	2914503	Prochlorococcus phage P-SCSP1q	2914503 2731990 2731643 2731619 2731618 2731360 2731341 10239	NA	Autographiviridae	NA	Prochlorococcus phage P-SCSP1q	NA	Prochlorococcus sp. MED4	1218	1218 2881426 1890424 3028117 1117 1798711 1783272 2 131567	Synechococcales	Prochlorococcaceae	Prochlorococcus	NA	NA	Virus-Host database
OM416776	2196272498	2914502	Prochlorococcus phage P-SCSP1p	2914502 2731990 2731643 2731619 2731618 2731360 2731341 10239	NA	Autographiviridae	NA	Prochlorococcus phage P-SCSP1p	NA	Prochlorococcus sp. MED4	1218	1218 2881426 1890424 3028117 1117 1798711 1783272 2 131567	Synechococcales	Prochlorococcaceae	Prochlorococcus	NA	NA	Virus-Host database
OM416767	2196272137	2914493	Prochlorococcus phage P-SCSP1f	2914493 2731990 2731643 2731619 2731618 2731360 2731341 10239	NA	Autographiviridae	NA	Prochlorococcus phage P-SCSP1f	NA	Prochlorococcus sp. MED4	1218	1218 2881426 1890424 3028117 1117 1798711 1783272 2 131567	Synechococcales	Prochlorococcaceae	Prochlorococcus	NA	NA	Virus-Host database
OM416778	2196272579	2914504	Prochlorococcus phage P-SCSP1s	2914504 2731990 2731643 2731619 2731618 2731360 2731341 10239	NA	Autographiviridae	NA	Prochlorococcus phage P-SCSP1s	NA	Prochlorococcus sp. MED4	1218	1218 2881426 1890424 3028117 1117 1798711 1783272 2 131567	Synechococcales	Prochlorococcaceae	Prochlorococcus	NA	NA	Virus-Host database
OM416779	2196272619	2914505	Prochlorococcus phage P-SCSP1u	2914505 2731990 2731643 2731619 2731618 2731360 2731341 10239	NA	Autographiviridae	NA	Prochlorococcus phage P-SCSP1u	NA	Prochlorococcus sp. MED4	1218	1218 2881426 1890424 3028117 1117 1798711 1783272 2 131567	Synechococcales	Prochlorococcaceae	Prochlorococcus	NA	NA	Virus-Host database
NC_025455	712915364	756277	Synechococcus phage S-CBP2	756277 2733928 2731951 2731643 2731619 2731618 2731360 2731341 10239	NA	Autographiviridae	Kembevirus	Kembevirus SCBP2	NA	Synechococcus sp. CB0208	255252	255252 2626047 1129 1890426 1890424 3028117 1117 1798711 1783272 2 131567	Synechococcales	Synechococcaceae	Synechococcus	Synechococcus sp. CB0208	NA	Virus-Host database
MZ803112	2095881066	1332140	Synechococcus T7-like virus S-TIP28	1332140 2788638 2731986 2731643 2731619 2731618 2731360 2731341 10239	NA	Autographiviridae	Voetvirus	Synechococcus T7-like virus S-TIP28	NA	Synechococcus sp. CC9605	110662	110662 2626047 1129 1890426 1890424 3028117 1117 1798711 1783272 2 131567	Synechococcales	Synechococcaceae	Synechococcus	Synechococcus sp. CC9605	NA	Virus-Host database
NC_009531	148724443	2914003	Synechococcus phage Syn5	2914003 438482 2731986 2731643 2731619 2731618 2731360 2731341 10239	NA	Autographiviridae	Voetvirus	Voetvirus syn5	NA	Synechococcus sp. WH 8109	166314	166314 2626047 1129 1890426 1890424 3028117 1117 1798711 1783272 2 131567	Synechococcales	Synechococcaceae	Synechococcus	Synechococcus sp. WH 8109	NA	Virus-Host database
NC_003390	939482337	2905923	Synechococcus phage P60	2905923 151528 2731984 2731643 2731619 2731618 2731360 2731341 10239	NA	Autographiviridae	Tiilvirus	Tiilvirus P60	NA	Synechococcus sp. WH7805	59931	59931 2626047 1129 1890426 1890424 3028117 1117 1798711 1783272 2 131567	Synechococcales	Synechococcaceae	Synechococcus	Synechococcus sp. WH 7805	NA	Virus-Host database
NC_029031	971767318	461711	Synechococcus phage S-CBP42	461711 2733888 2731926 2731643 2731619 2731618 2731360 2731341 10239	NA	Autographiviridae	Aegirvirus	Aegirvirus SCBP42	NA	Synechococcus sp. WH7803	32051	32051 2626047 1129 1890426 1890424 3028117 1117 1798711 1783272 2 131567	Synechococcales	Synechococcaceae	Synechococcus	Synechococcus sp. WH 7803	NA	Virus-Host database
NC_016658	372217768	445693	Cyanophage NATL1A-7	445693 2733897 2731933 2731643 2731619 2731618 2731360 2731341 10239	NA	Autographiviridae	Cheungvirus	Cheungvirus NATL1A7	NA	Prochlorococcus sp. NATL1A	1218	1218 2881426 1890424 3028117 1117 1798711 1783272 2 131567	Synechococcales	Prochlorococcaceae	Prochlorococcus	NA	NA	Virus-Host database
NC_016656	372217655	444876	Cyanophage P-SSP2	444876 2733967 2731985 2731643 2731619 2731618 2731360 2731341 10239	NA	Autographiviridae	Tritonvirus	Tritonvirus PSSP2	NA	Synechococcus sp. WH8017	1129	1129 1890426 1890424 3028117 1117 1798711 1783272 2 131567	Synechococcales	Synechococcaceae	Synechococcus	NA	NA	Virus-Host database
NC_006882	388483859	2908095	Prochlorococcus phage P-SSP7	2908095 268748 2731983 2731643 2731619 2731618 2731360 2731341 10239	NA	Autographiviridae	Tiamatvirus	Tiamatvirus PSSP7	NA	Prochlorococcus	1218	1218 2881426 1890424 3028117 1117 1798711 1783272 2 131567	Synechococcales	Prochlorococcaceae	Prochlorococcus	NA	NA	Virus-Host database
NC_016659	372217834	445692	Cyanophage NATL2A-133	445692 2733963 2731981 2731643 2731619 2731618 2731360 2731341 10239	NA	Autographiviridae	Tangaroavirus	Tangaroavirus NATL2A133	NA	Prochlorococcus marinus str. NATL2A	59920	59920 1219 1218 2881426 1890424 3028117 1117 1798711 1783272 2 131567	Synechococcales	Prochlorococcaceae	Prochlorococcus	Prochlorococcus marinus	Prochlorococcus marinus str. NATL2A	Virus-Host database
NC_016657	372217712	444875	Cyanophage 9515-10a	444875 2733962 2731981 2731643 2731619 2731618 2731360 2731341 10239	NA	Autographiviridae	Tangaroavirus	Tangaroavirus tv951510a	NA	Prochlorococcus sp. MIT9515	1218	1218 2881426 1890424 3028117 1117 1798711 1783272 2 131567	Synechococcales	Prochlorococcaceae	Prochlorococcus	NA	NA	Virus-Host database
HQ634152	451989085	382275	Prochlorococcus phage P-SSP6	382275 2733962 2731981 2731643 2731619 2731618 2731360 2731341 10239	NA	Autographiviridae	Tangaroavirus	Tangaroavirus tv951510a	NA	Prochlorococcus marinus MIT9515	1218	1218 2881426 1890424 3028117 1117 1798711 1783272 2 131567	Synechococcales	Prochlorococcaceae	Prochlorococcus	NA	NA	Virus-Host database
MT424636	1839366243	2735125	Synechococcus phage S-SBP1	2735125 2788049 2731927 2731643 2731619 2731618 2731360 2731341 10239	NA	Autographiviridae	Ashivirus	Synechococcus phage S-SBP1	NA	Synechococcus sp. WH 7803	32051	32051 2626047 1129 1890426 1890424 3028117 1117 1798711 1783272 2 131567	Synechococcales	Synechococcaceae	Synechococcus	Synechococcus sp. WH 7803	NA	Virus-Host database
NC_048026	1842020398	1332145	Synechococcus T7-like phage S-TIP37	1332145 2733920 2731943 2731643 2731619 2731618 2731360 2731341 10239	NA	Autographiviridae	Igirivirus	Igirivirus STIP37	NA	Synechococcus sp. WH8109	166314	166314 2626047 1129 1890426 1890424 3028117 1117 1798711 1783272 2 131567	Synechococcales	Synechococcaceae	Synechococcus	Synechococcus sp. WH 8109	NA	Virus-Host database
NC_048171	1842034010	2545435	Synechococcus phage S-B28	2545435 2733953 2731972 2731643 2731619 2731618 2731360 2731341 10239	NA	Autographiviridae	Qadamvirus	Qadamvirus SB28	NA	Synechococcus sp. KSHK05	1129	1129 1890426 1890424 3028117 1117 1798711 1783272 2 131567	Synechococcales	Synechococcaceae	Synechococcus	NA	NA	Virus-Host database
MW015080	1933143397	2781607	Synechococcus phage S-SRP01	2781607 2731990 2731643 2731619 2731618 2731360 2731341 10239	NA	Autographiviridae	NA	Synechococcus phage S-SRP01	NA	Synechococcus sp. KCZYR4S1	1129	1129 1890426 1890424 3028117 1117 1798711 1783272 2 131567	Synechococcales	Synechococcaceae	Synechococcus	NA	NA	Virus-Host database
OQ999402	2531916626	3058957	Synechococcus phage DSL-LC07	3058957 2731990 2731643 2731619 2731618 2731360 2731341 10239	NA	Autographiviridae	NA	Synechococcus phage DSL-LC07	NA	Synechococcus sp.	1131	1131 2626047 1129 1890426 1890424 3028117 1117 1798711 1783272 2 131567	Synechococcales	Synechococcaceae	Synechococcus	Synechococcus sp.	NA	Virus-Host database
NC_025456	712915418	1273711	Synechococcus phage S-CBP1	1273711 2731990 2731643 2731619 2731618 2731360 2731341 10239	NA	Autographiviridae	NA	Synechococcus phage S-CBP1	NA	Synechococcus sp. CB0101	232348	232348 2626047 1129 1890426 1890424 3028117 1117 1798711 1783272 2 131567	Synechococcales	Synechococcaceae	Synechococcus	Synechococcus sp. CB0101	NA	Virus-Host database
NC_025461	712915691	756276	Synechococcus phage S-CBP3	756276 2733931 2731956 2731643 2731619 2731618 2731360 2731341 10239	NA	Autographiviridae	Lirvirus	Lirvirus SCBP3	NA	Synechococcus sp. CB0101	232348	232348 2626047 1129 1890426 1890424 3028117 1117 1798711 1783272 2 131567	Synechococcales	Synechococcaceae	Synechococcus	Synechococcus sp. CB0101	NA	Virus-Host database
NC_025464	712915997	754059	Synechococcus phage S-CBP4	754059 2733949 2731970 2731643 2731619 2731618 2731360 2731341 10239	NA	Autographiviridae	Poseidonvirus	Poseidonvirus SCBP4	NA	Synechococcus sp. CB0101	232348	232348 2626047 1129 1890426 1890424 3028117 1117 1798711 1783272 2 131567	Synechococcales	Synechococcaceae	Synechococcus	Synechococcus sp. CB0101	NA	Virus-Host database
KJ410740	604671046	1468179	Synechococcus phage S-EIVl	1468179 2788787 2731619 2731618 2731360 2731341 10239	NA	NA	NA	Synechococcus phage S-EIVl	NA	Synechococcus sp. PCCC-A2c	1129	1129 1890426 1890424 3028117 1117 1798711 1783272 2 131567	Synechococcales	Synechococcaceae	Synechococcus	NA	NA	Virus-Host database
NC_016766	374531742	756275	Synechococcus phage S-CBS4	756275 2788787 2731619 2731618 2731360 2731341 10239	NA	NA	NA	Synechococcus phage S-CBS4	NA	Synechococcus sp. CB0101	232348	232348 2626047 1129 1890426 1890424 3028117 1117 1798711 1783272 2 131567	Synechococcales	Synechococcaceae	Synechococcus	Synechococcus sp. CB0101	NA	Virus-Host database
MH636380	1444393936	2293728	Cylindrospermopsis raciborskii virus RM-2018a	2293728 2788787 2731619 2731618 2731360 2731341 10239	NA	NA	NA	Cylindrospermopsis raciborskii virus RM-2018a	NA	Cylindrospermopsis raciborskii	77022	77022 77021 1892259 1161 3028117 1117 1798711 1783272 2 131567	Nostocales	Aphanizomenonaceae	Cylindrospermopsis	Cylindrospermopsis raciborskii	NA	Virus-Host database
OQ625504	2506107819	3046275	Cylindrospermopsis phage Cr-LKS4	3046275 2788787 2731619 2731618 2731360 2731341 10239	NA	NA	NA	Cylindrospermopsis phage Cr-LKS4	NA	Cylindrospermopsis raciborskii KLL07	683357	683357 77022 77021 1892259 1161 3028117 1117 1798711 1783272 2 131567	Nostocales	Aphanizomenonaceae	Cylindrospermopsis	Cylindrospermopsis raciborskii	Cylindrospermopsis raciborskii KLL07	Virus-Host database
NC_013021	254729462	658401	Cyanophage PSS2	658401 2788787 2731619 2731618 2731360 2731341 10239	NA	NA	NA	Cyanophage PSS2	NA	Prochlorococcus marinus str. MIT 9313	74547	74547 1219 1218 2881426 1890424 3028117 1117 1798711 1783272 2 131567	Synechococcales	Prochlorococcaceae	Prochlorococcus	Prochlorococcus marinus	Prochlorococcus marinus str. MIT 9313	Virus-Host database
OQ587941	2496382469	3038222	Synechococcus phage S-CRES3	3038222 2788787 2731619 2731618 2731360 2731341 10239	NA	NA	NA	Synechococcus phage S-CRES3	NA	Synechococcus sp.	1131	1131 2626047 1129 1890426 1890424 3028117 1117 1798711 1783272 2 131567	Synechococcales	Synechococcaceae	Synechococcus	Synechococcus sp.	NA	Virus-Host database
NC_015463	331027904	753084	Synechococcus phage S-CBS2	753084 2788787 2731619 2731618 2731360 2731341 10239	NA	NA	NA	Synechococcus phage S-CBS2	NA	Synechococcus sp. CB0204	232353	232353 2626047 1129 1890426 1890424 3028117 1117 1798711 1783272 2 131567	Synechococcales	Synechococcaceae	Synechococcus	Synechococcus sp. CB0204	NA	Virus-Host database
OQ587940	2496382350	3038221	Synechococcus phage S-CRES2	3038221 2788787 2731619 2731618 2731360 2731341 10239	NA	NA	NA	Synechococcus phage S-CRES2	NA	Synechococcus sp.	1131	1131 2626047 1129 1890426 1890424 3028117 1117 1798711 1783272 2 131567	Synechococcales	Synechococcaceae	Synechococcus	Synechococcus sp.	NA	Virus-Host database
OQ587939	2496382238	3038220	Synechococcus phage S-CRES1	3038220 2788787 2731619 2731618 2731360 2731341 10239	NA	NA	NA	Synechococcus phage S-CRES1	NA	Synechococcus sp.	1131	1131 2626047 1129 1890426 1890424 3028117 1117 1798711 1783272 2 131567	Synechococcales	Synechococcaceae	Synechococcus	Synechococcus sp.	NA	Virus-Host database
NC_048106	1842029369	2053653	Synechococcus phage S-CBWM1	2053653 2734084 2733091 2731619 2731618 2731360 2731341 10239	NA	NA	Aokuangvirus	Aokuangvirus SCBWM1	NA	Synechococcus sp. CBW1002	1353134	1353134 2626047 1129 1890426 1890424 3028117 1117 1798711 1783272 2 131567	Synechococcales	Synechococcaceae	Synechococcus	Synechococcus sp. CBW1002	NA	Virus-Host database
MN013189	1682781200	2587456	Microcystis phage Mic1	2587456 2788787 2731619 2731618 2731360 2731341 10239	NA	NA	NA	Microcystis phage Mic1	NA	Microcystis	1125	1125 1890449 1118 1301283 3028117 1117 1798711 1783272 2 131567	Chroococcales	Microcystaceae	Microcystis	NA	NA	Virus-Host database
FN436268	984670913	645116	Acaryochloris phage A-HIS1	645116 2788787 2731619 2731618 2731360 2731341 10239	NA	NA	NA	Acaryochloris phage A-HIS1	NA	Acaryochloris marina strain MBIC11017	155977	155977 1890429 3079744 3028117 1117 1798711 1783272 2 131567	Acaryochloridales	Acaryochloridaceae	Acaryochloris	NA	NA	Virus-Host database
FN436269	984671009	645117	Acaryochloris phage A-HIS2	645117 2788787 2731619 2731618 2731360 2731341 10239	NA	NA	NA	Acaryochloris phage A-HIS2	NA	Acaryochloris marina strain MBIC11017	155977	155977 1890429 3079744 3028117 1117 1798711 1783272 2 131567	Acaryochloridales	Acaryochloridaceae	Acaryochloris	NA	NA	Genbank
KU234532	1026924784	1775255	Nostoc phage N1	1775255 2788787 2731619 2731618 2731360 2731341 10239	NA	NA	NA	Nostoc phage N1	NA	Nostoc sp. PCC7210	1177	1177 1162 1161 3028117 1117 1798711 1783272 2 131567	Nostocales	Nostocaceae	Nostoc	NA	NA	Virus-Host database
MZ078141	2043522172	2833876	Anabaena phage Elbi	2833876 2788787 2731619 2731618 2731360 2731341 10239	NA	NA	NA	Anabaena phage Elbi	NA	Anabaena sp. PCC 7120	103690	103690 2593658 1177 1162 1161 3028117 1117 1798711 1783272 2 131567	Nostocales	Nostocaceae	Nostoc	Nostoc sp. PCC 7120 = FACHB-418	NA	Virus-Host database
PP438415	2725670574	3128131	Dolichospermum phage Dfl-JY23	3128131 2788787 2731619 2731618 2731360 2731341 10239	NA	NA	NA	Dolichospermum phage Dfl-JY23	NA	Dolichospermum flos-aquae	1166	1166 748770 1892259 1161 3028117 1117 1798711 1783272 2 131567	Nostocales	Aphanizomenonaceae	Dolichospermum	Dolichospermum flos-aquae	NA	Virus-Host database
MT426122	1867204135	2736366	Nostoc phage YongM	2736366 2788787 2731619 2731618 2731360 2731341 10239	NA	NA	NA	Nostoc phage YongM	NA	Nostoc sp. FACHB-596	1177	1177 1162 1161 3028117 1117 1798711 1783272 2 131567	Nostocales	Nostocaceae	Nostoc	NA	NA	Virus-Host database
KU234533	1026924874	1775256	Nostoc phage A1	1775256 2788787 2731619 2731618 2731360 2731341 10239	NA	NA	NA	Nostoc phage A1	NA	Nostoc sp. PCC7210	1177	1177 1162 1161 3028117 1117 1798711 1783272 2 131567	Nostocales	Nostocaceae	Nostoc	NA	NA	Virus-Host database
NC_008562	117530171	2856824	Microcystis phage LMM01	2856824 2845597 2843384 2731619 2731618 2731360 2731341 10239	NA	NA	Fukuivirus	Fukuivirus LMM01	NA	Microcystis	1125	1125 1890449 1118 1301283 3028117 1117 1798711 1783272 2 131567	Chroococcales	Microcystaceae	Microcystis	NA	NA	Virus-Host database
OP394178	2302037137	2888520	Cyanophage MaMV-DH01	2888520 2852362 2843384 2731619 2731618 2731360 2731341 10239	NA	NA	Fukuivirus	Cyanophage MaMV-DH01	NA	Microcystis aeruginosa FACHB-524	2486203	2486203 1126 1125 1890449 1118 1301283 3028117 1117 1798711 1783272 2 131567	Chroococcales	Microcystaceae	Microcystis	Microcystis aeruginosa	Microcystis aeruginosa FACHB-524	Virus-Host database
NC_029002	971764724	1357715	Microcystis phage MaMV-DC	1357715 2845598 2843384 2731619 2731618 2731360 2731341 10239	NA	NA	Fukuivirus	Fukuivirus MVDC	NA	Microcystis aeruginosa	1126	1126 1125 1890449 1118 1301283 3028117 1117 1798711 1783272 2 131567	Chroococcales	Microcystaceae	Microcystis	Microcystis aeruginosa	NA	Virus-Host database
NC_029032	971821933	1391455	Phormidium phage MIS-PhV1A	1391455 79205 2204151 12429 10239	NA	NA	NA	Phormidium phage MIS-PhV1A	NA	Phormidium sp. MIS-PhA	1378061	1378061 2609805 1198 1892254 1150 1301283 3028117 1117 1798711 1783272 2 131567	Oscillatoriales	Oscillatoriaceae	Phormidium	Phormidium sp. MIS-PhA	NA	Virus-Host database
NC_028998	971821875	1391456	Phormidium phage MIS-PhV1B	1391456 79205 2204151 12429 10239	NA	NA	NA	Phormidium phage MIS-PhV1B	NA	Phormidium sp. MIS-PhA	1378061	1378061 2609805 1198 1892254 1150 1301283 3028117 1117 1798711 1783272 2 131567	Oscillatoriales	Oscillatoriaceae	Phormidium	Phormidium sp. MIS-PhA	NA	Virus-Host database
MG209611	1278264395	2047766	Aphanizomenon phage vB_AphaS-CL131	2047766 2788787 2731619 2731618 2731360 2731341 10239	NA	NA	NA	Aphanizomenon phage vB_AphaS-CL131	NA	Aphanizomenon flos-aquae	1176	1176 1175 1892259 1161 3028117 1117 1798711 1783272 2 131567	Nostocales	Aphanizomenonaceae	Aphanizomenon	Aphanizomenon flos-aquae	NA	Virus-Host database
NC_016564	371496125	994601	Planktothrix phage PaV-LD	994601 2788787 2731619 2731618 2731360 2731341 10239	NA	NA	NA	Planktothrix phage PaV-LD	NA	Planktothrix agardhii HAB637	598707	598707 1160 54304 1892252 1150 1301283 3028117 1117 1798711 1783272 2 131567	Oscillatoriales	Microcoleaceae	Planktothrix	Planktothrix agardhii	Planktothrix agardhii HAB637	Virus-Host database
NC_048637	1859642433	1777122	Nodularia phage vB_NpeS-2AV2	1777122 2845688 2843444 2731619 2731618 2731360 2731341 10239	NA	NA	Ravarandavirus	Ravarandavirus rv2AV2	NA	Nodularia sp. AV2	159191	159191 1892259 1161 3028117 1117 1798711 1783272 2 131567	Nostocales	Aphanizomenonaceae	Nodularia	NA	NA	Virus-Host database
MK605246	1603722663	2557583	Nodularia phage vB_NspS-kac68v162	2557583 2845690 2843444 2731619 2731618 2731360 2731341 10239	NA	NA	Ravarandavirus	Ravarandavirus kac68v161	NA	Nodularia spumigena kac68	1955803	1955803 70799 159191 1892259 1161 3028117 1117 1798711 1783272 2 131567	Nostocales	Aphanizomenonaceae	Nodularia	Nodularia spumigena	Nodularia spumigena kac68	Virus-Host database
NC_048757	1859656553	2557582	Nodularia phage vB_NspS-kac68v161	2557582 2845690 2843444 2731619 2731618 2731360 2731341 10239	NA	NA	Ravarandavirus	Ravarandavirus kac68v161	NA	Nodularia spumigena kac68	1955803	1955803 70799 159191 1892259 1161 3028117 1117 1798711 1783272 2 131567	Nostocales	Aphanizomenonaceae	Nodularia	Nodularia spumigena	Nodularia spumigena kac68	Virus-Host database
MK605244	1603722257	2557581	Nodularia phage vB_NspS-kac65v162	2557581 2845689 2843444 2731619 2731618 2731360 2731341 10239	NA	NA	Ravarandavirus	Ravarandavirus kac65v151	NA	Nodularia spumigena KAC65	159191	159191 1892259 1161 3028117 1117 1798711 1783272 2 131567	Nostocales	Aphanizomenonaceae	Nodularia	NA	NA	Virus-Host database
MK605243	1603722050	2557580	Nodularia phage vB_NspS-kac65v161	2557580 2845689 2843444 2731619 2731618 2731360 2731341 10239	NA	NA	Ravarandavirus	Ravarandavirus kac65v151	NA	Nodularia spumigena KAC65	159191	159191 1892259 1161 3028117 1117 1798711 1783272 2 131567	Nostocales	Aphanizomenonaceae	Nodularia	NA	NA	Virus-Host database
NC_048756	1859656346	2557579	Nodularia phage vB_NspS-kac65v151	2557579 2845689 2843444 2731619 2731618 2731360 2731341 10239	NA	NA	Ravarandavirus	Ravarandavirus kac65v151	NA	Nodularia spumigena KAC65	159191	159191 1892259 1161 3028117 1117 1798711 1783272 2 131567	Nostocales	Aphanizomenonaceae	Nodularia	NA	NA	Virus-Host database
ON073792	2223876415	2932864	Aphanizomenon phage Yong-DA	2932864 12333 10239	NA	NA	NA	Aphanizomenon phage Yong-DA	NA	NA	1175	NA	NA	NA	NA	NA	NA	NA
MW495066	1990399386	2812902	Microcystis phage MaAM05	2812902 2788787 2731619 2731618 2731360 2731341 10239	NA	NA	NA	Microcystis phage MaAM05	NA	Microcystis sp. SG03	1125	1125 1890449 1118 1301283 3028117 1117 1798711 1783272 2 131567	Chroococcales	Microcystaceae	Microcystis	NA	NA	Genbank
OM897575	2220664922	2928836	Leptolyngbya phage Lbo240-yong1	2928836 2852912 2843475 2731619 2731618 2731360 2731341 10239	NA	NA	Wumpquatrovirus	Leptolyngbya phage Lbo240-yong1	NA	Leptolyngbya boryana FACHB-240	47251	47251 3081713 1890438 3079749 3028117 1117 1798711 1783272 2 131567	Leptolyngbyales	Leptolyngbyaceae	Leptolyngbya	NA	NA	Virus-Host database
NC_008367	115304338	2913979	Phormidium phage Pf-WMP4	2913979 400567 2843475 2731619 2731618 2731360 2731341 10239	NA	NA	Wumpquatrovirus	Wumpquatrovirus WMP4	NA	Phormidium	1198	1198 1892254 1150 1301283 3028117 1117 1798711 1783272 2 131567	Oscillatoriales	Oscillatoriaceae	Phormidium	NA	NA	Virus-Host database
OP589309	2347363098	2996049	Leptolyngbya phage LPP-1	2996049 3279178 3153088 3152150 2731619 2731618 2731360 2731341 10239	NA	NA	NA	Leptolyngbya phage LPP-1	NA	Leptolyngbya boryana IU 594	462680	462680 1184 47251 3081713 1890438 3079749 3028117 1117 1798711 1783272 2 131567	Leptolyngbyales	Leptolyngbyaceae	Leptolyngbya	Leptolyngbya boryana	Leptolyngbya boryana IU 594	Virus-Host database
OP056300	2287971662	2970324	Plectonema phage Pbo-yong3	2970324 3279179 3153088 3152150 2731619 2731618 2731360 2731341 10239	NA	NA	NA	Morrisvirus Pboyong3	NA	Leptolyngba boryana FACHB-402	1184	1184 47251 3081713 1890438 3079749 3028117 1117 1798711 1783272 2 131567	Leptolyngbyales	Leptolyngbyaceae	Leptolyngbya	Leptolyngbya boryana	NA	Virus-Host database
ON677538	2273795417	2961687	Plectonema phage JingP1	2961687 3279177 3153088 3152150 2731619 2731618 2731360 2731341 10239	NA	NA	NA	Morrisvirus JingP1	NA	Plectonema sp.	29414	29414 2617954 1183 1892254 1150 1301283 3028117 1117 1798711 1783272 2 131567	Oscillatoriales	Oscillatoriaceae	Plectonema	Plectonema sp.	NA	Virus-Host database
KY888885	1348408610	2099663	Mastigocladus phage CHP58	2099663 2788787 2731619 2731618 2731360 2731341 10239	NA	NA	NA	Mastigocladus phage CHP58	NA	Mastigocladus sp.	29418	29418 2638141 29417 1892263 1161 3028117 1117 1798711 1783272 2 131567	Nostocales	Hapalosiphonaceae	Mastigocladus	Mastigocladus sp.	NA	Virus-Host database
NC_024358	658310528	1357732	Anabaena phage A-4L	1357732 2843684 2843404 2731619 2731618 2731360 2731341 10239	NA	NA	Kozyakovvirus	Kozyakovvirus A4L	NA	Anabaena variabilis	264691	264691 264688 1162 1161 3028117 1117 1798711 1783272 2 131567	Nostocales	Nostocaceae	Trichormus	Trichormus variabilis	NA	Virus-Host database
MT457475	1886225519	2736280	Arthronema virus TR020	2736280 2788787 2731619 2731618 2731360 2731341 10239	NA	NA	NA	Arthronema virus TR020	NA	Arthronema africanum	241438	241438 241432 1890438 3079749 3028117 1117 1798711 1783272 2 131567	Leptolyngbyales	Leptolyngbyaceae	Arthronema	Arthronema africanum	NA	Virus-Host database
OP590147	2347364613	2996053	Leptolyngbya phage LPP-2 st. SPI	2996053 2852913 2843476 2731619 2731618 2731360 2731341 10239	NA	NA	Wumptrevirus	Leptolyngbya phage LPP-2 st. SPI	NA	Leptolyngbya boryana IU 594	462680	462680 1184 47251 3081713 1890438 3079749 3028117 1117 1798711 1783272 2 131567	Leptolyngbyales	Leptolyngbyaceae	Leptolyngbya	Leptolyngbya boryana	Leptolyngbya boryana IU 594	Virus-Host database
NC_022751	557307628	434346	Cyanophage PP	434346 2845836 2843476 2731619 2731618 2731360 2731341 10239	NA	NA	Wumptrevirus	Wumptrevirus PP	NA	Leptolyngbya boryana	1184	1184 47251 3081713 1890438 3079749 3028117 1117 1798711 1783272 2 131567	Leptolyngbyales	Leptolyngbyaceae	Leptolyngbya	Leptolyngbya boryana	NA	Virus-Host database
EF537008	146230032	2914005	Phormidium phage Pf-WMP3	2914005 440250 2843476 2731619 2731618 2731360 2731341 10239	NA	NA	Wumptrevirus	Wumptrevirus WMP3	NA	Leptolyngbya foveolarum	47253	47253 47251 3081713 1890438 3079749 3028117 1117 1798711 1783272 2 131567	Leptolyngbyales	Leptolyngbyaceae	Leptolyngbya	Leptolyngbya foveolarum	NA	Genbank
MZ447863	2067455506	2859073	Microcystis phage Mea-Yong924-1	2859073 2788787 2731619 2731618 2731360 2731341 10239	NA	NA	NA	Microcystis phage Mea-Yong924-1	NA	Microcystis sp.	1127	1127 2643300 1125 1890449 1118 1301283 3028117 1117 1798711 1783272 2 131567	Chroococcales	Microcystaceae	Microcystis	Microcystis sp.	NA	Virus-Host database
MZ570427	2074143851	2861006	Microcystis phage Mae-Yong924-2	2861006 2788787 2731619 2731618 2731360 2731341 10239	NA	NA	NA	Microcystis phage Mae-Yong924-2	NA	Microcystis sp.	1127	1127 2643300 1125 1890449 1118 1301283 3028117 1117 1798711 1783272 2 131567	Chroococcales	Microcystaceae	Microcystis	Microcystis sp.	NA	Virus-Host database
ON968453	2311025626	2981585	Pseudanabaena phage Pan2	2981585 2788787 2731619 2731618 2731360 2731341 10239	NA	NA	NA	Pseudanabaena phage Pan2	NA	Pseudanabaena sp.	1153	1153 2593292 1152 1890436 2881377 3028117 1117 1798711 1783272 2 131567	Pseudanabaenales	Pseudanabaenaceae	Pseudanabaena	Pseudanabaena sp.	NA	Virus-Host database
MT362618	1841757278	2736190	Microcystis phage MaeS	2736190 2788787 2731619 2731618 2731360 2731341 10239	NA	NA	NA	Microcystis phage MaeS	NA	Microcystis aeruginosa FACHB-942	267875	267875 1126 1125 1890449 1118 1301283 3028117 1117 1798711 1783272 2 131567	Chroococcales	Microcystaceae	Microcystis	Microcystis aeruginosa	Microcystis aeruginosa FACHB-942	Virus-Host database
ON968456	2311025852	2981588	Pseudanabaena phage Pan5	2981588 2788787 2731619 2731618 2731360 2731341 10239	NA	NA	NA	Pseudanabaena phage Pan5	NA	Pseudanabaena sp.	1153	1153 2593292 1152 1890436 2881377 3028117 1117 1798711 1783272 2 131567	Pseudanabaenales	Pseudanabaenaceae	Pseudanabaena	Pseudanabaena sp.	NA	Virus-Host database
OM868080	2232940148	2928844	Synechococcus phage Yong-L1-251	2928844 2788787 2731619 2731618 2731360 2731341 10239	NA	NA	NA	Synechococcus phage Yong-L1-251	NA	Synechococcus sp. PCC 7002	32049	32049 3079910 3079908 2815910 1118 1301283 3028117 1117 1798711 1783272 2 131567	Chroococcales	Geminocystaceae	Picosynechococcus	Picosynechococcus sp. PCC 7002	NA	Virus-Host database
OM868077	2232939865	2928850	Synechococcus phage Yong-M4-251	2928850 456491 10860 2732094 2732411 2732410 2732090 2731342 10239	Tubulavirales	Inoviridae	NA	Synechococcus phage Yong-M4-251	NA	Synechococcus sp. PCC 7002	32049	32049 3079910 3079908 2815910 1118 1301283 3028117 1117 1798711 1783272 2 131567	Chroococcales	Geminocystaceae	Picosynechococcus	Picosynechococcus sp. PCC 7002	NA	Virus-Host database
NC_052968	1985464828	1964565	Synechococcus virus S-ESS1	1964565 2956437 2943018 2943001 2731619 2731618 2731360 2731341 10239	NA	Casjensviridae	Sessunavirus	Sessunavirus SESS1	NA	Synechococcus sp.	1131	1131 2626047 1129 1890426 1890424 3028117 1117 1798711 1783272 2 131567	Synechococcales	Synechococcaceae	Synechococcus	Synechococcus sp.	NA	Virus-Host database
OM868081	2232940272	2928845	Synechococcus phage Yong-L2-223	2928845 2788787 2731619 2731618 2731360 2731341 10239	NA	NA	NA	Synechococcus phage Yong-L2-223	NA	Synechococcus sp. PCC 7002	32049	32049 3079910 3079908 2815910 1118 1301283 3028117 1117 1798711 1783272 2 131567	Chroococcales	Geminocystaceae	Picosynechococcus	Picosynechococcus sp. PCC 7002	NA	Virus-Host database
MK069556	1576867779	2483660	Microcystis phage Me-ZS1	2483660 2788787 2731619 2731618 2731360 2731341 10239	NA	NA	NA	Microcystis phage Me-ZS1	NA	Microcystis elabens	44824	44824 1125 1890449 1118 1301283 3028117 1117 1798711 1783272 2 131567	Chroococcales	Microcystaceae	Microcystis	Microcystis elabens	NA	Virus-Host database
ON968452	2311025521	2981584	Pseudanabaena phage Pan1	2981584 2788398 2560183 2731619 2731618 2731360 2731341 10239	NA	NA	Nanhaivirus	Pseudanabaena phage Pan1	NA	Pseudanabaena sp.	1153	1153 2593292 1152 1890436 2881377 3028117 1117 1798711 1783272 2 131567	Pseudanabaenales	Pseudanabaenaceae	Pseudanabaena	Pseudanabaena sp.	NA	Virus-Host database
ON014755	2239986166	2936519	Pseudanabaena phage Pam3	2936519 2788787 2731619 2731618 2731360 2731341 10239	NA	NA	NA	Pseudanabaena phage Pam3	NA	Pseudanabaena sp.	1153	1153 2593292 1152 1890436 2881377 3028117 1117 1798711 1783272 2 131567	Pseudanabaenales	Pseudanabaenaceae	Pseudanabaena	Pseudanabaena sp.	NA	Virus-Host database
MK105819	1523455563	2488632	Synechococcus phage S-H1	2488632 2788787 2731619 2731618 2731360 2731341 10239	NA	NA	NA	Synechococcus phage S-H1	NA	Synechococcus sp. WH 7803	32051	32051 2626047 1129 1890426 1890424 3028117 1117 1798711 1783272 2 131567	Synechococcales	Synechococcaceae	Synechococcus	Synechococcus sp. WH 7803	NA	Virus-Host database
MG271909	1275230339	2008320	Synechococcus phage S-LBS1	2008320 2788787 2731619 2731618 2731360 2731341 10239	NA	NA	NA	Synechococcus phage S-LBS1	NA	Synechococcus sp. TCC793	2057980	2057980 2626047 1129 1890426 1890424 3028117 1117 1798711 1783272 2 131567	Synechococcales	Synechococcaceae	Synechococcus	Synechococcus sp. TCC793	NA	Virus-Host database
NC_016164	356870794	909297	Synechococcus phage S-CBS1	909297 2788787 2731619 2731618 2731360 2731341 10239	NA	NA	NA	Synechococcus phage S-CBS1	NA	Synechococcus sp. CB0201	232352	232352 2626047 1129 1890426 1890424 3028117 1117 1798711 1783272 2 131567	Synechococcales	Synechococcaceae	Synechococcus	Synechococcus sp. CB0201	NA	Virus-Host database
NC_015465	331028007	753085	Synechococcus phage S-CBS3	753085 2788787 2731619 2731618 2731360 2731341 10239	NA	NA	NA	Synechococcus phage S-CBS3	NA	Synechococcus sp. CB0202	305430	305430 2626047 1129 1890426 1890424 3028117 1117 1798711 1783272 2 131567	Synechococcales	Synechococcaceae	Synechococcus	Synechococcus sp. CB0202	NA	Virus-Host database
OM868082	2232940460	2928846	Synechococcus phage Yong-M2-251	2928846 2788787 2731619 2731618 2731360 2731341 10239	NA	NA	NA	Synechococcus phage Yong-M2-251	NA	Synechococcus sp. PCC 7002	32049	32049 3079910 3079908 2815910 1118 1301283 3028117 1117 1798711 1783272 2 131567	Chroococcales	Geminocystaceae	Picosynechococcus	Picosynechococcus sp. PCC 7002	NA	Virus-Host database
OM868078	2233091645	2928848	Synechococcus phage Yong-M3-253	2928848 2788787 2731619 2731618 2731360 2731341 10239	NA	NA	NA	Synechococcus phage Yong-M3-253	NA	Synechococcus sp. PCC 7002	32049	32049 3079910 3079908 2815910 1118 1301283 3028117 1117 1798711 1783272 2 131567	Chroococcales	Geminocystaceae	Picosynechococcus	Picosynechococcus sp. PCC 7002	NA	Genbank
ON014753	2239985879	2936517	Pseudanabaena phage Pam1	2936517 2788787 2731619 2731618 2731360 2731341 10239	NA	NA	NA	Pseudanabaena phage Pam1	NA	Pseudanabaena sp.	1153	1153 2593292 1152 1890436 2881377 3028117 1117 1798711 1783272 2 131567	Pseudanabaenales	Pseudanabaenaceae	Pseudanabaena	Pseudanabaena sp.	NA	Virus-Host database
ON968454	2311025730	2981586	Pseudanabaena phage Pan3	2981586 2788787 2731619 2731618 2731360 2731341 10239	NA	NA	NA	Pseudanabaena phage Pan3	NA	Pseudanabaena sp.	1153	1153 2593292 1152 1890436 2881377 3028117 1117 1798711 1783272 2 131567	Pseudanabaenales	Pseudanabaenaceae	Pseudanabaena	Pseudanabaena sp.	NA	Virus-Host database
OM868079	2232939984	2928849	Synechococcus phage Yong-M4-211	2928849 2788787 2731619 2731618 2731360 2731341 10239	NA	NA	NA	Synechococcus phage Yong-M4-211	NA	Synechococcus sp. PCC 7002	32049	32049 3079910 3079908 2815910 1118 1301283 3028117 1117 1798711 1783272 2 131567	Chroococcales	Geminocystaceae	Picosynechococcus	Picosynechococcus sp. PCC 7002	NA	Virus-Host database
OM868076	2232939703	2928847	Synechococcus phage Yong-M3-232	2928847 2788787 2731619 2731618 2731360 2731341 10239	NA	NA	NA	Synechococcus phage Yong-M3-232	NA	Synechococcus sp. PCC 7002	32049	32049 3079910 3079908 2815910 1118 1301283 3028117 1117 1798711 1783272 2 131567	Chroococcales	Geminocystaceae	Picosynechococcus	Picosynechococcus sp. PCC 7002	NA	Virus-Host database
MT855965	1896828356	2762278	Microcystis phage vB_MaeS-yong1	2762278 2788787 2731619 2731618 2731360 2731341 10239	NA	NA	NA	Microcystis phage vB_MaeS-yong1	NA	Microcystis aeruginosa	1126	1126 1125 1890449 1118 1301283 3028117 1117 1798711 1783272 2 131567	Chroococcales	Microcystaceae	Microcystis	Microcystis aeruginosa	NA	Virus-Host database
OQ540923	2552392052	3038218	Microcystis phage MJing1	3038218 2788787 2731619 2731618 2731360 2731341 10239	NA	NA	NA	Microcystis phage MJing1	NA	Microcystis sp.	1127	1127 2643300 1125 1890449 1118 1301283 3028117 1117 1798711 1783272 2 131567	Chroococcales	Microcystaceae	Microcystis	Microcystis sp.	NA	Virus-Host database
ON014757	2239986316	2936521	Pseudanabaena phage Pam5	2936521 2788787 2731619 2731618 2731360 2731341 10239	NA	NA	NA	Pseudanabaena phage Pam5	NA	Pseudanabaena sp.	1153	1153 2593292 1152 1890436 2881377 3028117 1117 1798711 1783272 2 131567	Pseudanabaenales	Pseudanabaenaceae	Pseudanabaena	Pseudanabaena sp.	NA	Virus-Host database
MW822601	2023410366	2823854	Synechococcus phage S-SRP02	2823854 2731990 2731643 2731619 2731618 2731360 2731341 10239	NA	Autographiviridae	NA	Synechococcus phage S-SRP02	NA	Synechococcus sp. SR-C1	2730087	2730087 2626047 1129 1890426 1890424 3028117 1117 1798711 1783272 2 131567	Synechococcales	Synechococcaceae	Synechococcus	Synechococcus sp. SR-C1	NA	Virus-Host database
OL906435	2285518445	2911673	Planktothrix phage Pag-Yong1	2911673 2788787 2731619 2731618 2731360 2731341 10239	NA	NA	NA	Planktothrix phage Pag-Yong1	NA	Planktothrix	54304	54304 1892252 1150 1301283 3028117 1117 1798711 1783272 2 131567	Oscillatoriales	Microcoleaceae	Planktothrix	NA	NA	Virus-Host database
ON981384	2312626157	2968431	Synechococcus phage MinM1	2968431 2788787 2731619 2731618 2731360 2731341 10239	NA	NA	NA	Synechococcus phage MinM1	NA	Synechococcus sp.	1131	1131 2626047 1129 1890426 1890424 3028117 1117 1798711 1783272 2 131567	Synechococcales	Synechococcaceae	Synechococcus	Synechococcus sp.	NA	Virus-Host database
OM681334	2209435578	2924883	Microcystis phage vB_MweS-yong2	2924883 2788787 2731619 2731618 2731360 2731341 10239	NA	NA	NA	Microcystis phage vB_MweS-yong2	NA	Microcystis sp.	1127	1127 2643300 1125 1890449 1118 1301283 3028117 1117 1798711 1783272 2 131567	Chroococcales	Microcystaceae	Microcystis	Microcystis sp.	NA	Virus-Host database
KY697807	1168017638	1969741	Microcystis phage MACPNOA1	1969741 2788787 2731619 2731618 2731360 2731341 10239	NA	NA	NA	Microcystis phage MACPNOA1	NA	Microcystis aeruginosa FACHB-469	862717	862717 1126 1125 1890449 1118 1301283 3028117 1117 1798711 1783272 2 131567	Chroococcales	Microcystaceae	Microcystis	Microcystis aeruginosa	Microcystis aeruginosa FACHB-469	Virus-Host database
MZ436628	2067455452	2852111	Microcystis phage Mwe-Yong1	2852111 2788787 2731619 2731618 2731360 2731341 10239	NA	NA	NA	Microcystis phage Mwe-Yong1	NA	Microcystis sp.	1127	1127 2643300 1125 1890449 1118 1301283 3028117 1117 1798711 1783272 2 131567	Chroococcales	Microcystaceae	Microcystis	Microcystis sp.	NA	Virus-Host database
MW334946	1950368362	260586	Cyanophage S-2L	260586 2788787 2731619 2731618 2731360 2731341 10239	NA	NA	NA	Cyanophage S-2L	NA	Cyanobacteriota	1129	1129 1890426 1890424 3028117 1117 1798711 1783272 2 131567	Synechococcales	Synechococcaceae	Synechococcus	NA	NA	Virus-Host database
ON014756	2239986241	2936520	Pseudanabaena phage Pam4	2936520 2788787 2731619 2731618 2731360 2731341 10239	NA	NA	NA	Pseudanabaena phage Pam4	NA	Pseudanabaena sp.	1153	1153 2593292 1152 1890436 2881377 3028117 1117 1798711 1783272 2 131567	Pseudanabaenales	Pseudanabaenaceae	Pseudanabaena	Pseudanabaena sp.	NA	Virus-Host database
OM373202	2190262856	2913520	Cylindrospermopsis phage Cr-LKS3	2913520 2788787 2731619 2731618 2731360 2731341 10239	NA	NA	NA	Cylindrospermopsis phage Cr-LKS3	NA	Cylindrospermopsis raciborskii KLL06	77021	77021 1892259 1161 3028117 1117 1798711 1783272 2 131567	Nostocales	Aphanizomenonaceae	Cylindrospermopsis	NA	NA	Virus-Host database
BK059895	2313947837	2916630	Cyanophage Cy-LDV1	2916630 2788787 2731619 2731618 2731360 2731341 10239	NA	NA	NA	Cyanophage Cy-LDV1	NA	Cylindrospermopsis raciborskii	77022	77022 77021 1892259 1161 3028117 1117 1798711 1783272 2 131567	Nostocales	Aphanizomenonaceae	Cylindrospermopsis	Cylindrospermopsis raciborskii	NA	Genbank
OP028995	2282035451	2969983	Microcystis phage Mae-Yong1326-1	2969983 2788787 2731619 2731618 2731360 2731341 10239	NA	NA	NA	Microcystis phage Mae-Yong1326-1	NA	Microcystis aeruginosa FACHB-1326	3054861	3054861 1126 1125 1890449 1118 1301283 3028117 1117 1798711 1783272 2 131567	Chroococcales	Microcystaceae	Microcystis	Microcystis aeruginosa	Microcystis aeruginosa FACHB-1326	Virus-Host database
MZ923504	2177696787	2910156	Microcystis phage MinS1	2910156 2788787 2731619 2731618 2731360 2731341 10239	NA	NA	NA	Microcystis phage MinS1	NA	Microcystis aeruginosa	1126	1126 1125 1890449 1118 1301283 3028117 1117 1798711 1783272 2 131567	Chroococcales	Microcystaceae	Microcystis	Microcystis aeruginosa	NA	Virus-Host database
ON968455	2311025796	2981587	Pseudanabaena phage Pan4	2981587 2788787 2731619 2731618 2731360 2731341 10239	NA	NA	NA	Pseudanabaena phage Pan4	NA	Pseudanabaena sp.	1153	1153 2593292 1152 1890436 2881377 3028117 1117 1798711 1783272 2 131567	Pseudanabaenales	Pseudanabaenaceae	Pseudanabaena	Pseudanabaena sp.	NA	Virus-Host database
ON615601	2273980577	2951202	Synechococcus phage BUCT-ZZ01	2951202 2960609 2946160 2731619 2731618 2731360 2731341 10239	NA	Kyanoviridae	NA	Synechococcus phage BUCT-ZZ01	NA	Synechococcus elongatus PCC 7942 = FACHB-805	1140	1140 32046 1129 1890426 1890424 3028117 1117 1798711 1783272 2 131567	Synechococcales	Synechococcaceae	Synechococcus	Synechococcus elongatus	Synechococcus elongatus PCC 7942 = FACHB-805	Virus-Host database
NC_015569	333798163	1026955	Synechococcus phage S-CRM01	1026955 2960609 2946160 2731619 2731618 2731360 2731341 10239	NA	Kyanoviridae	NA	Synechococcus phage S-CRM01	NA	Synechococcus sp. LC16	1129	1129 1890426 1890424 3028117 1117 1798711 1783272 2 131567	Synechococcales	Synechococcaceae	Synechococcus	NA	NA	Virus-Host database
OR473000	2581899000	3075959	Synechococcus phage S-CREM2	3075959 2960609 2946160 2731619 2731618 2731360 2731341 10239	NA	Kyanoviridae	NA	Synechococcus phage S-CREM2	NA	Synechococcus sp. CRE1902	1131	1131 2626047 1129 1890426 1890424 3028117 1117 1798711 1783272 2 131567	Synechococcales	Synechococcaceae	Synechococcus	Synechococcus sp.	NA	Virus-Host database
MK016664	1595662170	2545437	Synechococcus phage S-B68	2545437 2960609 2946160 2731619 2731618 2731360 2731341 10239	NA	Kyanoviridae	NA	Synechococcus phage S-B68	NA	Synechococcus sp. WH 7803	32051	32051 2626047 1129 1890426 1890424 3028117 1117 1798711 1783272 2 131567	Synechococcales	Synechococcaceae	Synechococcus	Synechococcus sp. WH 7803	NA	Virus-Host database
NC_070965	2438098575	2718942	Synechococcus phage S-H34	2718942 3060183 3044754 2946160 2731619 2731618 2731360 2731341 10239	NA	Kyanoviridae	Makaravirus	Makaravirus thirtyfour	NA	Synechococcus sp. MW02	1620844	1620844 2626047 1129 1890426 1890424 3028117 1117 1798711 1783272 2 131567	Synechococcales	Synechococcaceae	Synechococcus	Synechococcus sp. MW02	NA	Virus-Host database
NC_070959	2438097045	2718943	Synechococcus phage S-N03	2718943 3060040 3044734 2946160 2731619 2731618 2731360 2731341 10239	NA	Kyanoviridae	Huanghaivirus	Huanghaivirus snothree	NA	Synechococcus sp. MW02	1620844	1620844 2626047 1129 1890426 1890424 3028117 1117 1798711 1783272 2 131567	Synechococcales	Synechococcaceae	Synechococcus	Synechococcus sp. MW02	NA	Virus-Host database
NC_015287	326783659	445686	Synechococcus phage S-SSM7	445686 2956125 2948803 2946160 2731619 2731618 2731360 2731341 10239	NA	Kyanoviridae	Lipsvirus	Lipsvirus ssm7	NA	Synechococcus sp. WH8109	166314	166314 2626047 1129 1890426 1890424 3028117 1117 1798711 1783272 2 131567	Synechococcales	Synechococcaceae	Synechococcus	Synechococcus sp. WH 8109	NA	Virus-Host database
OQ504983	2565120400	3038207	Synechococcus phage S-8S55	3038207 2752548 2733107 2946160 2731619 2731618 2731360 2731341 10239	NA	Kyanoviridae	Kanaloavirus	Synechococcus phage S-8S55	NA	Parasynechococcus marenigrum WH 8102	84588	84588 2881428 2881427 2881426 1890424 3028117 1117 1798711 1783272 2 131567	Synechococcales	Prochlorococcaceae	Parasynechococcus	Parasynechococcus marenigrum	Parasynechococcus marenigrum WH 8102	Virus-Host database
OQ504984	2565120635	3038208	Synechococcus phage S-8S56	3038208 2752548 2733107 2946160 2731619 2731618 2731360 2731341 10239	NA	Kyanoviridae	Kanaloavirus	Synechococcus phage S-8S56	NA	Parasynechococcus marenigrum WH 8102	84588	84588 2881428 2881427 2881426 1890424 3028117 1117 1798711 1783272 2 131567	Synechococcales	Prochlorococcaceae	Parasynechococcus	Parasynechococcus marenigrum	Parasynechococcus marenigrum WH 8102	Virus-Host database
NC_055761	2047442888	2100130	Synechococcus virus S-PRM1	2100130 2956181 2948814 2946160 2731619 2731618 2731360 2731341 10239	NA	Kyanoviridae	Makelovirus	Makelovirus prm1	NA	Synechococcus sp. WH 7803	32051	32051 2626047 1129 1890426 1890424 3028117 1117 1798711 1783272 2 131567	Synechococcales	Synechococcaceae	Synechococcus	Synechococcus sp. WH 7803	NA	Virus-Host database
KU686205	1074042006	1883369	Synechococcus phage S-CAM9	1883369 2734111 2733107 2946160 2731619 2731618 2731360 2731341 10239	NA	Kyanoviridae	Kanaloavirus	Kanaloavirus scam9	NA	Synechococcus sp.	1131	1131 2626047 1129 1890426 1890424 3028117 1117 1798711 1783272 2 131567	Synechococcales	Synechococcaceae	Synechococcus	Synechococcus sp.	NA	Genbank
NC_070962	2438097726	2588487	Synechococcus phage S-SCSM1	2588487 3060828 3044869 2946160 2731619 2731618 2731360 2731341 10239	NA	Kyanoviridae	Zhoulongquanvirus	Zhoulongquanvirus esscess	NA	Synechococcus sp. WH 7803	32051	32051 2626047 1129 1890426 1890424 3028117 1117 1798711 1783272 2 131567	Synechococcales	Synechococcaceae	Synechococcus	Synechococcus sp. WH 7803	NA	Virus-Host database
MT408532	1841756866	2736186	Synechococcus phage SynMITS9220M01	2736186 2960609 2946160 2731619 2731618 2731360 2731341 10239	NA	Kyanoviridae	NA	Synechococcus phage SynMITS9220M01	NA	Synechococcus sp. MIT S9220	166309	166309 2626047 1129 1890426 1890424 3028117 1117 1798711 1783272 2 131567	Synechococcales	Synechococcaceae	Synechococcus	Synechococcus sp. MIT S9220	NA	Virus-Host database
NC_047838	1842003769	2023996	Synechococcus phage Bellamy	2023996 2734095 2733096 2946160 2731619 2731618 2731360 2731341 10239	NA	Kyanoviridae	Bellamyvirus	Bellamyvirus bellamy	NA	Synechococcus str. WH8109	1129	1129 1890426 1890424 3028117 1117 1798711 1783272 2 131567	Synechococcales	Synechococcaceae	Synechococcus	NA	NA	Virus-Host database
NC_015279	326781756	444860	Synechococcus phage S-SM2	444860 2956223 2948839 2946160 2731619 2731618 2731360 2731341 10239	NA	Kyanoviridae	Nilusvirus	Nilusvirus ssm2	NA	Synechococcus sp. WH8017	1129	1129 1890426 1890424 3028117 1117 1798711 1783272 2 131567	Synechococcales	Synechococcaceae	Synechococcus	NA	NA	Virus-Host database
NC_028955	971760222	1542477	Prochlorococcus phage P-TIM68	1542477 2955972 2948752 2946160 2731619 2731618 2731360 2731341 10239	NA	Kyanoviridae	Haifavirus	Haifavirus tim68	NA	Prochlorococcus sp. MIT9515	1218	1218 2881426 1890424 3028117 1117 1798711 1783272 2 131567	Synechococcales	Prochlorococcaceae	Prochlorococcus	NA	NA	Virus-Host database
MK799832	1675876134	2484637	Synechococcus phage S-B05	2484637 2960609 2946160 2731619 2731618 2731360 2731341 10239	NA	Kyanoviridae	NA	Synechococcus phage S-B05	NA	Synechococcus sp. MW02	1620844	1620844 2626047 1129 1890426 1890424 3028117 1117 1798711 1783272 2 131567	Synechococcales	Synechococcaceae	Synechococcus	Synechococcus sp. MW02	NA	Virus-Host database
MN018232	1696898230	2484638	Synechococcus phage S-B43	2484638 2960609 2946160 2731619 2731618 2731360 2731341 10239	NA	Kyanoviridae	NA	Synechococcus phage S-B43	NA	Synechococcus sp. MW02	1620844	1620844 2626047 1129 1890426 1890424 3028117 1117 1798711 1783272 2 131567	Synechococcales	Synechococcaceae	Synechococcus	Synechococcus sp. MW02	NA	Virus-Host database
MN695335	1781485280	2674977	Synechococcus phage B23	2674977 2960609 2946160 2731619 2731618 2731360 2731341 10239	NA	Kyanoviridae	NA	Synechococcus phage B23	NA	Synechoccus sp.	1129	1129 1890426 1890424 3028117 1117 1798711 1783272 2 131567	Synechococcales	Synechococcaceae	Synechococcus	NA	NA	Virus-Host database
MN695334	1781484764	2674978	Synechococcus phage B3	2674978 2960609 2946160 2731619 2731618 2731360 2731341 10239	NA	Kyanoviridae	NA	Synechococcus phage B3	NA	Synechoccus sp.	1129	1129 1890426 1890424 3028117 1117 1798711 1783272 2 131567	Synechococcales	Synechococcaceae	Synechococcus	NA	NA	Virus-Host database
NC_070963	2438098009	2781608	Synechococcus phage S-SRM01	2781608 3060697 3044820 2946160 2731619 2731618 2731360 2731341 10239	NA	Kyanoviridae	Serangoonvirus	Serangoonvirus essarone	NA	Synechococcus sp. KCZYC6	1129	1129 1890426 1890424 3028117 1117 1798711 1783272 2 131567	Synechococcales	Synechococcaceae	Synechococcus	NA	NA	Virus-Host database
OR032571	2531907133	3058947	Synechococcus phage DSL-LC02	3058947 2960609 2946160 2731619 2731618 2731360 2731341 10239	NA	Kyanoviridae	NA	Synechococcus phage DSL-LC02	NA	Synechococcus sp.	1131	1131 2626047 1129 1890426 1890424 3028117 1117 1798711 1783272 2 131567	Synechococcales	Synechococcaceae	Synechococcus	Synechococcus sp.	NA	Virus-Host database
OR003938	2531904249	3058961	Synechococcus phage DSL-LC03	3058961 2960609 2946160 2731619 2731618 2731360 2731341 10239	NA	Kyanoviridae	NA	Synechococcus phage DSL-LC03	NA	Synechococcus sp.	1131	1131 2626047 1129 1890426 1890424 3028117 1117 1798711 1783272 2 131567	Synechococcales	Synechococcaceae	Synechococcus	Synechococcus sp.	NA	Virus-Host database
GU071092	265525079	268746	Prochlorococcus phage P-SSM2	268746 2734140 2733129 2946160 2731619 2731618 2731360 2731341 10239	NA	Kyanoviridae	Salacisavirus	Salacisavirus pssm2	NA	Prochlorococcus	1218	1218 2881426 1890424 3028117 1117 1798711 1783272 2 131567	Synechococcales	Prochlorococcaceae	Prochlorococcus	NA	NA	Virus-Host database
NC_048049	1842023695	2268578	Synechococcus phage S-T4	2268578 2734145 2733133 2946160 2731619 2731618 2731360 2731341 10239	NA	Kyanoviridae	Tamkungvirus	Tamkungvirus ST4	NA	Synechococcus sp. WH 7803	32051	32051 2626047 1129 1890426 1890424 3028117 1117 1798711 1783272 2 131567	Synechococcales	Synechococcaceae	Synechococcus	Synechococcus sp. WH 7803	NA	Virus-Host database
MT586120	1867213835	1883368	Synechococcus phage S-CAM7	1883368 2734118 2733113 2946160 2731619 2731618 2731360 2731341 10239	NA	Kyanoviridae	Mazuvirus	Mazuvirus scam7	NA	Synechococcus sp. WH 7803	32051	32051 2626047 1129 1890426 1890424 3028117 1117 1798711 1783272 2 131567	Synechococcales	Synechococcaceae	Synechococcus	Synechococcus sp. WH 7803	NA	Genbank
KJ019151	723039928	1493511	Synechococcus phage ACG-2014f	1493511 2734085 2733092 2946160 2731619 2731618 2731360 2731341 10239	NA	Kyanoviridae	Atlauavirus	Atlauavirus tusconc8	NA	Synechococcus	1129	1129 1890426 1890424 3028117 1117 1798711 1783272 2 131567	Synechococcales	Synechococcaceae	Synechococcus	NA	NA	Virus-Host database
NC_047714	1841990816	2790346	Synechococcus phage ACG-2014f_Syn7803US26	2790346 2734087 2733092 2946160 2731619 2731618 2731360 2731341 10239	NA	Kyanoviridae	Atlauavirus	Atlauavirus caeruleum	NA	Synechococcus	1129	1129 1890426 1890424 3028117 1117 1798711 1783272 2 131567	Synechococcales	Synechococcaceae	Synechococcus	NA	NA	Virus-Host database
NC_047713	1841990528	2790336	Synechococcus phage ACG-2014f_Syn7803C8	2790336 2734085 2733092 2946160 2731619 2731618 2731360 2731341 10239	NA	Kyanoviridae	Atlauavirus	Atlauavirus tusconc8	NA	Synechococcus	1129	1129 1890426 1890424 3028117 1117 1798711 1783272 2 131567	Synechococcales	Synechococcaceae	Synechococcus	NA	NA	Virus-Host database
NC_047712	1841990241	2790345	Synechococcus phage ACG-2014f_Syn7803C7	2790345 2734086 2733092 2946160 2731619 2731618 2731360 2731341 10239	NA	Kyanoviridae	Atlauavirus	Atlauavirus acg2014f	NA	Synechococcus	1129	1129 1890426 1890424 3028117 1117 1798711 1783272 2 131567	Synechococcales	Synechococcaceae	Synechococcus	NA	NA	Virus-Host database
NC_015284	326782972	445696	Prochlorococcus phage P-HM2	445696 2734108 2733104 2731619 2731618 2731360 2731341 10239	NA	NA	Eurybiavirus	Eurybiavirus PHM2	NA	Prochlorococcus sp. MED4	1218	1218 2881426 1890424 3028117 1117 1798711 1783272 2 131567	Synechococcales	Prochlorococcaceae	Prochlorococcus	NA	NA	Virus-Host database
NC_020845	472340220	889956	Prochlorococcus phage MED4-213	889956 2734106 2733104 2731619 2731618 2731360 2731341 10239	NA	NA	Eurybiavirus	Eurybiavirus MED4213	NA	Prochlorococcus MED4	1218	1218 2881426 1890424 3028117 1117 1798711 1783272 2 131567	Synechococcales	Prochlorococcaceae	Prochlorococcus	NA	NA	Virus-Host database
NC_015280	326782024	445700	Prochlorococcus phage P-HM1	445700 2734108 2733104 2731619 2731618 2731360 2731341 10239	NA	NA	Eurybiavirus	Eurybiavirus PHM2	NA	Prochlorococcus sp. MED4	1218	1218 2881426 1890424 3028117 1117 1798711 1783272 2 131567	Synechococcales	Prochlorococcaceae	Prochlorococcus	NA	NA	Virus-Host database
OQ319121	2449455063	753087	Synechococcus phage S-BM3	753087 2960609 2946160 2731619 2731618 2731360 2731341 10239	NA	Kyanoviridae	NA	Synechococcus phage S-BM3	NA	Synechococcus sp. WH 7803	32051	32051 2626047 1129 1890426 1890424 3028117 1117 1798711 1783272 2 131567	Synechococcales	Synechococcaceae	Synechococcus	Synechococcus sp. WH 7803	NA	Virus-Host database
KU686198	1074040368	1883366	Synechococcus phage S-CAM3	1883366 2734102 2733100 2946160 2731619 2731618 2731360 2731341 10239	NA	Kyanoviridae	Charybdisvirus	Charybdisvirus scam3	NA	Synechococcus sp.	1131	1131 2626047 1129 1890426 1890424 3028117 1117 1798711 1783272 2 131567	Synechococcales	Synechococcaceae	Synechococcus	Synechococcus sp.	NA	Genbank
KU686192	1074038873	754037	Synechococcus phage S-CAM1	754037 2734083 2733090 2946160 2731619 2731618 2731360 2731341 10239	NA	Kyanoviridae	Anaposvirus	Anaposvirus socalone	NA	Synechococcus sp.	1131	1131 2626047 1129 1890426 1890424 3028117 1117 1798711 1783272 2 131567	Synechococcales	Synechococcaceae	Synechococcus	Synechococcus sp.	NA	Genbank
LN828717	937342199	238854	Synechococcus phage S-PM2	238854 2734126 2733120 2946160 2731619 2731618 2731360 2731341 10239	NA	Kyanoviridae	Nodensvirus	Nodensvirus spm2	NA	Synechococcus	1129	1129 1890426 1890424 3028117 1117 1798711 1783272 2 131567	Synechococcales	Synechococcaceae	Synechococcus	NA	NA	Virus-Host database
NC_031235	1070619080	1278479	Cyanophage S-RIM32	1278479 2955536 2948640 2946160 2731619 2731618 2731360 2731341 10239	NA	Kyanoviridae	Bristolvirus	Bristolvirus rhodeisland	NA	Synechococcus sp.	1131	1131 2626047 1129 1890426 1890424 3028117 1117 1798711 1783272 2 131567	Synechococcales	Synechococcaceae	Synechococcus	Synechococcus sp.	NA	Virus-Host database
NC_070960	2438097293	2783669	Synechococcus phage S-H9-2	2783669 3060825 3044866 2946160 2731619 2731618 2731360 2731341 10239	NA	Kyanoviridae	Yushanluvirus	Yushanluvirus satich	NA	Synechococcus sp. WH 8102	84588	84588 2881428 2881427 2881426 1890424 3028117 1117 1798711 1783272 2 131567	Synechococcales	Prochlorococcaceae	Parasynechococcus	Parasynechococcus marenigrum	Parasynechococcus marenigrum WH 8102	Virus-Host database
NC_047734	1841995287	1278485	Cyanophage S-RIM44	1278485 2734152 2733139 2946160 2731619 2731618 2731360 2731341 10239	NA	Kyanoviridae	Vellamovirus	Vellamovirus rhodeisland44	NA	Synechococcus sp.	1131	1131 2626047 1129 1890426 1890424 3028117 1117 1798711 1783272 2 131567	Synechococcales	Synechococcaceae	Synechococcus	Synechococcus sp.	NA	Virus-Host database
NC_015288	326783979	444861	Prochlorococcus phage Syn1	444861 2734151 2733139 2946160 2731619 2731618 2731360 2731341 10239	NA	Kyanoviridae	Vellamovirus	Vellamovirus syn1	NA	Synechococcus sp. WH8101	59932	59932 2626047 1129 1890426 1890424 3028117 1117 1798711 1783272 2 131567	Synechococcales	Synechococcaceae	Synechococcus	Synechococcus sp. WH 8101	NA	Virus-Host database
NC_023587	589891766	1340810	Synechococcus phage ACG-2014h	1340810 2956426 2948898 2946160 2731619 2731618 2731360 2731341 10239	NA	Kyanoviridae	Sedonavirus	Sedonavirus tusconh	NA	Synechococcus sp. WH7803	32051	32051 2626047 1129 1890426 1890424 3028117 1117 1798711 1783272 2 131567	Synechococcales	Synechococcaceae	Synechococcus	Synechococcus sp. WH 7803	NA	Virus-Host database
NC_070961	2438097496	2783674	Synechococcus phage S-H9-1	2783674 3060690 3044815 2946160 2731619 2731618 2731360 2731341 10239	NA	Kyanoviridae	Scyllavirus	Scyllavirus aitchnine	NA	Synechococcus sp. MW02	1620844	1620844 2626047 1129 1890426 1890424 3028117 1117 1798711 1783272 2 131567	Synechococcales	Synechococcaceae	Synechococcus	Synechococcus sp. MW02	NA	Virus-Host database
NC_013085	255928922	555387	Synechococcus phage S-RSM4	555387 2955947 2948725 2946160 2731619 2731618 2731360 2731341 10239	NA	Kyanoviridae	Gibbetvirus	Gibbetvirus rsm4	NA	Synechococcus	1129	1129 1890426 1890424 3028117 1117 1798711 1783272 2 131567	Synechococcales	Synechococcaceae	Synechococcus	NA	NA	Virus-Host database
NC_031935	1102620075	1815522	Synechococcus phage S-WAM2	1815522 2734103 2733101 2946160 2731619 2731618 2731360 2731341 10239	NA	Kyanoviridae	Cymopoleiavirus	Cymopoleiavirus swam2	NA	Synechococcus sp.	1131	1131 2626047 1129 1890426 1890424 3028117 1117 1798711 1783272 2 131567	Synechococcales	Synechococcaceae	Synechococcus	Synechococcus sp.	NA	Virus-Host database
NC_027132	827047354	1493513	Synechococcus phage ACG-2014i	1493513 2955603 2948659 2946160 2731619 2731618 2731360 2731341 10239	NA	Kyanoviridae	Chalconvirus	Chalconvirus acg2014i	NA	Synechococcus	1129	1129 1890426 1890424 3028117 1117 1798711 1783272 2 131567	Synechococcales	Synechococcaceae	Synechococcus	NA	NA	Virus-Host database
NC_062736	2231613718	1493510	Synechococcus phage ACG-2014e	1493510 2955602 2948659 2946160 2731619 2731618 2731360 2731341 10239	NA	Kyanoviridae	Chalconvirus	Chalconvirus acg2014e	NA	Synechococcus	1129	1129 1890426 1890424 3028117 1117 1798711 1783272 2 131567	Synechococcales	Synechococcaceae	Synechococcus	NA	NA	Virus-Host database
NC_062735	2231613494	1493514	Synechococcus phage ACG-2014j	1493514 2956330 2948872 2946160 2731619 2731618 2731360 2731341 10239	NA	Kyanoviridae	Potamoivirus	Potamoivirus tusconj	NA	Synechococcus	1129	1129 1890426 1890424 3028117 1117 1798711 1783272 2 131567	Synechococcales	Synechococcaceae	Synechococcus	NA	NA	Virus-Host database
KU686202	1074041327	1883367	Synechococcus phage S-CAM4	1883367 2956329 2948872 2946160 2731619 2731618 2731360 2731341 10239	NA	Kyanoviridae	Potamoivirus	Potamoivirus cam4	NA	Synechococcus sp.	1131	1131 2626047 1129 1890426 1890424 3028117 1117 1798711 1783272 2 131567	Synechococcales	Synechococcaceae	Synechococcus	Synechococcus sp.	NA	Genbank
NC_028663	966198239	1589733	Cyanophage P-TIM40	1589733 2734115 2733110 2946160 2731619 2731618 2731360 2731341 10239	NA	Kyanoviridae	Libanvirus	Libanvirus ptim40	NA	Prochlorococcus marinus str. NATL2A	59920	59920 1219 1218 2881426 1890424 3028117 1117 1798711 1783272 2 131567	Synechococcales	Prochlorococcaceae	Prochlorococcus	Prochlorococcus marinus	Prochlorococcus marinus str. NATL2A	Virus-Host database
NC_070839	2438057562	2926475	Synechococcus phage S-SZBM1	2926475 3060701 3044824 2946160 2731619 2731618 2731360 2731341 10239	NA	Kyanoviridae	Shenzhenivirus	Shenzhenivirus sszbm1	NA	Synechococcus sp. CB0101	232348	232348 2626047 1129 1890426 1890424 3028117 1117 1798711 1783272 2 131567	Synechococcales	Synechococcaceae	Synechococcus	Synechococcus sp. CB0101	NA	Virus-Host database
NC_031944	1102620861	1815521	Synechococcus phage S-WAM1	1815521 2956469 2948913 2946160 2731619 2731618 2731360 2731341 10239	NA	Kyanoviridae	Sokavirus	Sokavirus swam1	NA	Synechococcus sp.	1131	1131 2626047 1129 1890426 1890424 3028117 1117 1798711 1783272 2 131567	Synechococcales	Synechococcaceae	Synechococcus	Synechococcus sp.	NA	Virus-Host database
OP535465	2315365818	2982919	Synechococcus phage S-CREM1	2982919 2960609 2946160 2731619 2731618 2731360 2731341 10239	NA	Kyanoviridae	NA	Synechococcus phage S-CREM1	NA	Synechococcus sp. CB0101	232348	232348 2626047 1129 1890426 1890424 3028117 1117 1798711 1783272 2 131567	Synechococcales	Synechococcaceae	Synechococcus	Synechococcus sp. CB0101	NA	Virus-Host database
NC_070964	2438098363	2783673	Synechococcus phage S-H38	2783673 3060818 3044861 2946160 2731619 2731618 2731360 2731341 10239	NA	Kyanoviridae	Yellowseavirus	Yellowseavirus thirtyeight	NA	Synechococcus sp. MW02	1620844	1620844 2626047 1129 1890426 1890424 3028117 1117 1798711 1783272 2 131567	Synechococcales	Synechococcaceae	Synechococcus	Synechococcus sp. MW02	NA	Virus-Host database
KX349303	1063213080	1278423	Cyanophage S-RIM14	1278423 2734079 2733087 2946160 2731619 2731618 2731360 2731341 10239	NA	Kyanoviridae	Ahtivirus	Ahtivirus sagseatwo	NA	Synechococcus	1129	1129 1890426 1890424 3028117 1117 1798711 1783272 2 131567	Synechococcales	Synechococcaceae	Synechococcus	NA	NA	Virus-Host database
NC_015281	326782266	445683	Synechococcus phage S-ShM2	445683 2734079 2733087 2946160 2731619 2731618 2731360 2731341 10239	NA	Kyanoviridae	Ahtivirus	Ahtivirus sagseatwo	NA	Synechococcus sp. WH8102	84588	84588 2881428 2881427 2881426 1890424 3028117 1117 1798711 1783272 2 131567	Synechococcales	Prochlorococcaceae	Parasynechococcus	Parasynechococcus marenigrum	Parasynechococcus marenigrum WH 8102	Virus-Host database
KJ019120	723032358	1493509	Synechococcus phage ACG-2014d	1493509 2956131 2948806 2946160 2731619 2731618 2731360 2731341 10239	NA	Kyanoviridae	Lowelvirus	Lowelvirus tuscon4d	NA	Synechococcus	1129	1129 1890426 1890424 3028117 1117 1798711 1783272 2 131567	Synechococcales	Synechococcaceae	Synechococcus	NA	NA	Virus-Host database
NC_008296	162290187	382359	Synechococcus phage syn9	382359 2956240 2948849 2946160 2731619 2731618 2731360 2731341 10239	NA	Kyanoviridae	Ormenosvirus	Ormenosvirus syn9	NA	Synechococcus sp. WH 8012	166313	166313 2626047 1129 1890426 1890424 3028117 1117 1798711 1783272 2 131567	Synechococcales	Synechococcaceae	Synechococcus	Synechococcus sp. WH 8012	NA	Virus-Host database
OP807803	2347390799	2995680	Synechococcus phage MS29	2995680 2960609 2946160 2731619 2731618 2731360 2731341 10239	NA	Kyanoviridae	NA	Synechococcus phage MS29	NA	Synechococcus	1129	1129 1890426 1890424 3028117 1117 1798711 1783272 2 131567	Synechococcales	Synechococcaceae	Synechococcus	NA	NA	Virus-Host database
MK493321	1603723705	2530169	Cyanophage S-RIM4	2530169 2961189 2948904 2946160 2731619 2731618 2731360 2731341 10239	NA	Kyanoviridae	Shandvirus	Cyanophage S-RIM4	NA	Synechococcus	1129	1129 1890426 1890424 3028117 1117 1798711 1783272 2 131567	Synechococcales	Synechococcaceae	Synechococcus	NA	NA	Virus-Host database
NC_055744	2047440403	2163901	Synechococcus phage S-B64	2163901 2956438 2948904 2946160 2731619 2731618 2731360 2731341 10239	NA	Kyanoviridae	Shandvirus	Shandvirus sb64	NA	Synechococcus sp. WH8102	84588	84588 2881428 2881427 2881426 1890424 3028117 1117 1798711 1783272 2 131567	Synechococcales	Prochlorococcaceae	Parasynechococcus	Parasynechococcus marenigrum	Parasynechococcus marenigrum WH 8102	Virus-Host database
NC_055719	2047435394	1983572	Synechococcus phage S-H35	1983572 2956439 2948904 2946160 2731619 2731618 2731360 2731341 10239	NA	Kyanoviridae	Shandvirus	Shandvirus sh35	NA	Synechococcus sp. WH8102	84588	84588 2881428 2881427 2881426 1890424 3028117 1117 1798711 1783272 2 131567	Synechococcales	Prochlorococcaceae	Parasynechococcus	Parasynechococcus marenigrum	Parasynechococcus marenigrum WH 8102	Virus-Host database
NC_019443	418487144	1079999	Synechococcus phage metaG-MbCM1	1079999 2955924 2948714 2946160 2731619 2731618 2731360 2731341 10239	NA	Kyanoviridae	Galenevirus	Galenevirus mbcm1	NA	Synechococcus	1129	1129 1890426 1890424 3028117 1117 1798711 1783272 2 131567	Synechococcales	Synechococcaceae	Synechococcus	NA	NA	Virus-Host database
NC_006884	312281391	268747	Prochlorococcus phage P-SSM4	268747 2845939 2843447 2946160 2731619 2731618 2731360 2731341 10239	NA	Kyanoviridae	Ronodorvirus	Ronodorvirus ssm4	NA	Prochlorococcus sp. NATL2A	1218	1218 2881426 1890424 3028117 1117 1798711 1783272 2 131567	Synechococcales	Prochlorococcaceae	Prochlorococcus	NA	NA	Virus-Host database
NC_015286	326783443	445684	Synechococcus phage Syn19	445684 2734134 2733125 2946160 2731619 2731618 2731360 2731341 10239	NA	Kyanoviridae	Pontusvirus	Pontusvirus syn19	NA	Synechococcus sp. WH8109	166314	166314 2626047 1129 1890426 1890424 3028117 1117 1798711 1783272 2 131567	Synechococcales	Synechococcaceae	Synechococcus	Synechococcus sp. WH 8109	NA	Virus-Host database
MH920640	1509791660	2484639	Synechococcus phage S-E7	2484639 2752529 2733109 2946160 2731619 2731618 2731360 2731341 10239	NA	Kyanoviridae	Leucotheavirus	Synechococcus phage S-E7	NA	Synechococcus sp. WH 7803	32051	32051 2626047 1129 1890426 1890424 3028117 1117 1798711 1783272 2 131567	Synechococcales	Synechococcaceae	Synechococcus	Synechococcus sp. WH 7803	NA	Virus-Host database
NC_015282	326782497	444859	Synechococcus phage S-SM1	444859 2734149 2733137 2946160 2731619 2731618 2731360 2731341 10239	NA	Kyanoviridae	Thetisvirus	Thetisvirus ssm1	NA	Synechococcus sp. WH6501	166310	166310 2626047 1129 1890426 1890424 3028117 1117 1798711 1783272 2 131567	Synechococcales	Synechococcaceae	Synechococcus	Synechococcus sp. WH 6501	NA	Virus-Host database
NC_015289	326784214	445685	Synechococcus phage S-SSM5	445685 2955956 2948728 2946160 2731619 2731618 2731360 2731341 10239	NA	Kyanoviridae	Glaucusvirus	Glaucusvirus ssm5	NA	Synechococcus sp. WH8102	84588	84588 2881428 2881427 2881426 1890424 3028117 1117 1798711 1783272 2 131567	Synechococcales	Prochlorococcaceae	Parasynechococcus	Parasynechococcus marenigrum	Parasynechococcus marenigrum WH 8102	Virus-Host database
NC_048015	1842019220	1048189	Cyanophage S-TIM4	1048189 2734148 2733136 2946160 2731619 2731618 2731360 2731341 10239	NA	Kyanoviridae	Thaumasvirus	Thaumasvirus stim4	NA	Synechococcus sp. WH8102	84588	84588 2881428 2881427 2881426 1890424 3028117 1117 1798711 1783272 2 131567	Synechococcales	Prochlorococcaceae	Parasynechococcus	Parasynechococcus marenigrum	Parasynechococcus marenigrum WH 8102	Virus-Host database
NC_015283	326782732	444862	Prochlorococcus phage P-RSM4	444862 2734148 2733136 2946160 2731619 2731618 2731360 2731341 10239	NA	Kyanoviridae	Thaumasvirus	Thaumasvirus stim4	NA	Prochlorococcus sp. MIT9303	1218	1218 2881426 1890424 3028117 1117 1798711 1783272 2 131567	Synechococcales	Prochlorococcaceae	Prochlorococcus	NA	NA	Virus-Host database
NC_015290	326784440	445688	Prochlorococcus phage P-SSM7	445688 2734127 2733121 2946160 2731619 2731618 2731360 2731341 10239	NA	Kyanoviridae	Palaemonvirus	Palaemonvirus pssm7	NA	Prochlorococcus sp. NATL1A	1218	1218 2881426 1890424 3028117 1117 1798711 1783272 2 131567	Synechococcales	Prochlorococcaceae	Prochlorococcus	NA	NA	Virus-Host database
NC_055710	2047433776	1883365	Synechococcus phage S-CAM22	1883365 2955237 2946789 2946160 2731619 2731618 2731360 2731341 10239	NA	Kyanoviridae	Alisovirus	Alisovirus socal22	NA	Synechococcus sp.	1131	1131 2626047 1129 1890426 1890424 3028117 1117 1798711 1783272 2 131567	Synechococcales	Synechococcaceae	Synechococcus	Synechococcus sp.	NA	Virus-Host database
KU686203	1074041565	754038	Synechococcus phage S-CAM8	754038 2956221 2948838 2946160 2731619 2731618 2731360 2731341 10239	NA	Kyanoviridae	Neritesvirus	Neritesvirus scam8	NA	Synechococcus sp.	1131	1131 2626047 1129 1890426 1890424 3028117 1117 1798711 1783272 2 131567	Synechococcales	Synechococcaceae	Synechococcus	Synechococcus sp.	NA	Genbank
NC_026924	815854289	1493512	Synechococcus phage ACG-2014g	1493512 2956144 2948809 2946160 2731619 2731618 2731360 2731341 10239	NA	Kyanoviridae	Macariavirus	Macariavirus tuscon14g	NA	Synechococcus	1129	1129 1890426 1890424 3028117 1117 1798711 1783272 2 131567	Synechococcales	Synechococcaceae	Synechococcus	NA	NA	Virus-Host database
KJ019041	723013444	1493508	Synechococcus phage ACG-2014b	1493508 2734124 2733118 2946160 2731619 2731618 2731360 2731341 10239	NA	Kyanoviridae	Nereusvirus	Nereusvirus tusconc4	NA	Synechococcus	1129	1129 1890426 1890424 3028117 1117 1798711 1783272 2 131567	Synechococcales	Synechococcaceae	Synechococcus	NA	NA	Virus-Host database
KJ019064	723018798	3126011	Synechococcus phage S-MbCM6	3126011 2734120 2733116 2946160 2731619 2731618 2731360 2731341 10239	NA	Kyanoviridae	Namakavirus	Namakavirus smbcm6	NA	Synechococcus	1129	1129 1890426 1890424 3028117 1117 1798711 1783272 2 131567	Synechococcales	Synechococcaceae	Synechococcus	NA	NA	Virus-Host database
KF156339	564271966	1340811	Synechococcus phage S-MbCM25	1340811 1079998 2734120 2733116 2946160 2731619 2731618 2731360 2731341 10239	NA	Kyanoviridae	Namakavirus	Namakavirus smbcm6	NA	Synechococcus sp. WH7803	32051	32051 2626047 1129 1890426 1890424 3028117 1117 1798711 1783272 2 131567	Synechococcales	Synechococcaceae	Synechococcus	Synechococcus sp. WH 7803	NA	Virus-Host database
KJ019038	723012811	1493507	Synechococcus phage ACG-2014a	1493507 2734078 2733086 2946160 2731619 2731618 2731360 2731341 10239	NA	Kyanoviridae	Acionnavirus	Acionnavirus monteraybay	NA	Synechococcus	1129	1129 1890426 1890424 3028117 1117 1798711 1783272 2 131567	Synechococcales	Synechococcaceae	Synechococcus	NA	NA	Virus-Host database
NC_023584	589891555	1340812	Synechococcus phage S-MbCM100	1340812 2734078 2733086 2946160 2731619 2731618 2731360 2731341 10239	NA	Kyanoviridae	Acionnavirus	Acionnavirus monteraybay	NA	Synechococcus sp. WH7803	32051	32051 2626047 1129 1890426 1890424 3028117 1117 1798711 1783272 2 131567	Synechococcales	Synechococcaceae	Synechococcus	Synechococcus sp. WH 7803	NA	Virus-Host database
MT162468	1837964777	2718941	Synechococcus phage S-H25	2718941 2752524 2733135 2946160 2731619 2731618 2731360 2731341 10239	NA	Kyanoviridae	Tefnutvirus	Synechococcus phage S-H25	NA	Synechococcus sp. WH 8102	84588	84588 2881428 2881427 2881426 1890424 3028117 1117 1798711 1783272 2 131567	Synechococcales	Prochlorococcaceae	Parasynechococcus	Parasynechococcus marenigrum	Parasynechococcus marenigrum WH 8102	Virus-Host database
OP917831	2416396903	2994463	Synechococcus phage S-M1	2994463 2752524 2733135 2946160 2731619 2731618 2731360 2731341 10239	NA	Kyanoviridae	Tefnutvirus	Synechococcus phage S-M1	NA	Synechococcus sp. WH 7803	32051	32051 2626047 1129 1890426 1890424 3028117 1117 1798711 1783272 2 131567	Synechococcales	Synechococcaceae	Synechococcus	Synechococcus sp. WH 7803	NA	Virus-Host database
NC_031242	1070621080	687803	Cyanophage S-RIM50	687803 2734122 2733117 2946160 2731619 2731618 2731360 2731341 10239	NA	Kyanoviridae	Neptunevirus	Neptunevirus srim50	NA	Synechococcus sp.	1131	1131 2626047 1129 1890426 1890424 3028117 1117 1798711 1783272 2 131567	Synechococcales	Synechococcaceae	Synechococcus	Synechococcus sp.	NA	Virus-Host database
KX349286	1063209245	756278	Synechococcus phage S-RIM8	756278 2734121 2733117 2946160 2731619 2731618 2731360 2731341 10239	NA	Kyanoviridae	Neptunevirus	Neptunevirus srim18	NA	Synechococcus	1129	1129 1890426 1890424 3028117 1117 1798711 1783272 2 131567	Synechococcales	Synechococcaceae	Synechococcus	NA	NA	Genbank
JF974289	375919032	869725	Synechococcus phage S-RIM8 A.HR3	869725 2752528 2733117 2946160 2731619 2731618 2731360 2731341 10239	NA	Kyanoviridae	Neptunevirus	Synechococcus phage S-RIM8 A.HR3	NA	Synechococcus sp. WH7803	32051	32051 2626047 1129 1890426 1890424 3028117 1117 1798711 1783272 2 131567	Synechococcales	Synechococcaceae	Synechococcus	Synechococcus sp. WH 7803	NA	Virus-Host database
HQ317385	375909286	869726	Synechococcus phage S-RIM8 A.HR5	869726 2752528 2733117 2946160 2731619 2731618 2731360 2731341 10239	NA	Kyanoviridae	Neptunevirus	Synechococcus phage S-RIM8 A.HR5	NA	Synechococcus sp. WH7803	32051	32051 2626047 1129 1890426 1890424 3028117 1117 1798711 1783272 2 131567	Synechococcales	Synechococcaceae	Synechococcus	Synechococcus sp. WH 7803	NA	Virus-Host database
NC_020486	460042674	869724	Synechococcus phage S-RIM8 A.HR1	869724 2734121 2733117 2946160 2731619 2731618 2731360 2731341 10239	NA	Kyanoviridae	Neptunevirus	Neptunevirus srim18	NA	Synechococcus sp. WH7803	32051	32051 2626047 1129 1890426 1890424 3028117 1117 1798711 1783272 2 131567	Synechococcales	Synechococcaceae	Synechococcus	Synechococcus sp. WH 7803	NA	Virus-Host database
OQ504979	2565119527	3038205	Synechococcus phage S-8S29	3038205 2752524 2733135 2946160 2731619 2731618 2731360 2731341 10239	NA	Kyanoviridae	Tefnutvirus	Synechococcus phage S-8S29	NA	Parasynechococcus marenigrum WH 8102	84588	84588 2881428 2881427 2881426 1890424 3028117 1117 1798711 1783272 2 131567	Synechococcales	Prochlorococcaceae	Parasynechococcus	Parasynechococcus marenigrum	Parasynechococcus marenigrum WH 8102	Virus-Host database
OQ504981	2565119953	3038210	Synechococcus phage S-RS29	3038210 2752524 2733135 2946160 2731619 2731618 2731360 2731341 10239	NA	Kyanoviridae	Tefnutvirus	Synechococcus phage S-RS29	NA	Synechococcus sp.	1131	1131 2626047 1129 1890426 1890424 3028117 1117 1798711 1783272 2 131567	Synechococcales	Synechococcaceae	Synechococcus	Synechococcus sp.	NA	Virus-Host database
KX349325	1063217832	2928618	Cyanophage S-RIM12_W1_24_0910	2928618 2734098 2733098 2946160 2731619 2731618 2731360 2731341 10239	NA	Kyanoviridae	Brizovirus	Brizovirus rhodeisland01	NA	Synechococcus sp.	1131	1131 2626047 1129 1890426 1890424 3028117 1117 1798711 1783272 2 131567	Synechococcales	Synechococcaceae	Synechococcus	Synechococcus sp.	NA	Virus-Host database
KX349322	1063217186	2928620	Cyanophage S-RIM12_Sn_31_0910	2928620 2734098 2733098 2946160 2731619 2731618 2731360 2731341 10239	NA	Kyanoviridae	Brizovirus	Brizovirus rhodeisland01	NA	Synechococcus sp.	1131	1131 2626047 1129 1890426 1890424 3028117 1117 1798711 1783272 2 131567	Synechococcales	Synechococcaceae	Synechococcus	Synechococcus sp.	NA	Virus-Host database
KX349321	1063216973	2928617	Cyanophage S-RIM12_Sn_07_0910	2928617 2734098 2733098 2946160 2731619 2731618 2731360 2731341 10239	NA	Kyanoviridae	Brizovirus	Brizovirus rhodeisland01	NA	Synechococcus sp.	1131	1131 2626047 1129 1890426 1890424 3028117 1117 1798711 1783272 2 131567	Synechococcales	Synechococcaceae	Synechococcus	Synechococcus sp.	NA	Virus-Host database
NC_047715	1841991075	2790347	Cyanophage S-RIM12 isolate RW_01_0310	2790347 2734098 2733098 2946160 2731619 2731618 2731360 2731341 10239	NA	Kyanoviridae	Brizovirus	Brizovirus rhodeisland01	NA	Synechococcus sp.	1131	1131 2626047 1129 1890426 1890424 3028117 1117 1798711 1783272 2 131567	Synechococcales	Synechococcaceae	Synechococcus	Synechococcus sp.	NA	Virus-Host database
KX349327	1063218260	2928624	Cyanophage S-RIM12_WH_07_0310	2928624 2734099 2733098 2946160 2731619 2731618 2731360 2731341 10239	NA	Kyanoviridae	Brizovirus	Brizovirus rhodeisland06	NA	Synechococcus sp.	1131	1131 2626047 1129 1890426 1890424 3028117 1117 1798711 1783272 2 131567	Synechococcales	Synechococcaceae	Synechococcus	Synechococcus sp.	NA	Virus-Host database
KX349324	1063217617	2928629	Cyanophage S-RIM12_W1_12_0610	2928629 2734099 2733098 2946160 2731619 2731618 2731360 2731341 10239	NA	Kyanoviridae	Brizovirus	Brizovirus rhodeisland06	NA	Synechococcus sp.	1131	1131 2626047 1129 1890426 1890424 3028117 1117 1798711 1783272 2 131567	Synechococcales	Synechococcaceae	Synechococcus	Synechococcus sp.	NA	Virus-Host database
NC_047716	1841991289	2790659	Cyanophage S-RIM12 isolate RW_06_0310	2790659 2734099 2733098 2946160 2731619 2731618 2731360 2731341 10239	NA	Kyanoviridae	Brizovirus	Brizovirus rhodeisland06	NA	Synechococcus sp.	1131	1131 2626047 1129 1890426 1890424 3028117 1117 1798711 1783272 2 131567	Synechococcales	Synechococcaceae	Synechococcus	Synechococcus sp.	NA	Virus-Host database
NC_047717	1841991505	2790660	Cyanophage S-RIM12 isolate W1_08_0910	2790660 2734100 2733098 2946160 2731619 2731618 2731360 2731341 10239	NA	Kyanoviridae	Brizovirus	Synechococcus virus SRIM12-08	NA	Synechococcus sp.	1131	1131 2626047 1129 1890426 1890424 3028117 1117 1798711 1783272 2 131567	Synechococcales	Synechococcaceae	Synechococcus	Synechococcus sp.	NA	Virus-Host database
KX349326	1063218047	2928623	Cyanophage S-RIM12_WH_05_0310	2928623 2734100 2733098 2946160 2731619 2731618 2731360 2731341 10239	NA	Kyanoviridae	Brizovirus	Synechococcus virus SRIM12-08	NA	Synechococcus sp.	1131	1131 2626047 1129 1890426 1890424 3028117 1117 1798711 1783272 2 131567	Synechococcales	Synechococcaceae	Synechococcus	Synechococcus sp.	NA	Virus-Host database
KX349311	1063214812	2928621	Cyanophage S-RIM12_RW_04_0310	2928621 2734100 2733098 2946160 2731619 2731618 2731360 2731341 10239	NA	Kyanoviridae	Brizovirus	Synechococcus virus SRIM12-08	NA	Synechococcus sp.	1131	1131 2626047 1129 1890426 1890424 3028117 1117 1798711 1783272 2 131567	Synechococcales	Synechococcaceae	Synechococcus	Synechococcus sp.	NA	Virus-Host database
KX349308	1063214169	2928613	Cyanophage S-RIM12_Np_15_0310	2928613 2734100 2733098 2946160 2731619 2731618 2731360 2731341 10239	NA	Kyanoviridae	Brizovirus	Synechococcus virus SRIM12-08	NA	Synechococcus sp.	1131	1131 2626047 1129 1890426 1890424 3028117 1117 1798711 1783272 2 131567	Synechococcales	Synechococcaceae	Synechococcus	Synechococcus sp.	NA	Virus-Host database
KX349318	1063216324	1278402	Cyanophage S-RIM12	1278402 2734097 2733098 2946160 2731619 2731618 2731360 2731341 10239	NA	Kyanoviridae	Brizovirus	Brizovirus syn33	NA	Synechococcus sp.	1131	1131 2626047 1129 1890426 1890424 3028117 1117 1798711 1783272 2 131567	Synechococcales	Synechococcaceae	Synechococcus	Synechococcus sp.	NA	Virus-Host database
KX349312	1063215026	2928615	Cyanophage S-RIM12_RW_04_0709	2928615 2734097 2733098 2946160 2731619 2731618 2731360 2731341 10239	NA	Kyanoviridae	Brizovirus	Brizovirus syn33	NA	Synechococcus sp.	1131	1131 2626047 1129 1890426 1890424 3028117 1117 1798711 1783272 2 131567	Synechococcales	Synechococcaceae	Synechococcus	Synechococcus sp.	NA	Virus-Host database
KX349319	1063216540	2928619	Cyanophage S-RIM12_RW_28_1109	2928619 2734097 2733098 2946160 2731619 2731618 2731360 2731341 10239	NA	Kyanoviridae	Brizovirus	Brizovirus syn33	NA	Synechococcus sp.	1131	1131 2626047 1129 1890426 1890424 3028117 1117 1798711 1783272 2 131567	Synechococcales	Synechococcaceae	Synechococcus	Synechococcus sp.	NA	Virus-Host database
KX349307	1063213953	2928625	Cyanophage S-RIM12_Np_14_0310	2928625 2734097 2733098 2946160 2731619 2731618 2731360 2731341 10239	NA	Kyanoviridae	Brizovirus	Brizovirus syn33	NA	Synechococcus sp.	1131	1131 2626047 1129 1890426 1890424 3028117 1117 1798711 1783272 2 131567	Synechococcales	Synechococcaceae	Synechococcus	Synechococcus sp.	NA	Virus-Host database
KX349317	1063216108	2928616	Cyanophage S-RIM12_RW_25_0210	2928616 2734097 2733098 2946160 2731619 2731618 2731360 2731341 10239	NA	Kyanoviridae	Brizovirus	Brizovirus syn33	NA	Synechococcus sp.	1131	1131 2626047 1129 1890426 1890424 3028117 1117 1798711 1783272 2 131567	Synechococcales	Synechococcaceae	Synechococcus	Synechococcus sp.	NA	Virus-Host database
KX349320	1063216756	2928628	Cyanophage S-RIM12_RW_29_1109	2928628 2734097 2733098 2946160 2731619 2731618 2731360 2731341 10239	NA	Kyanoviridae	Brizovirus	Brizovirus syn33	NA	Synechococcus sp.	1131	1131 2626047 1129 1890426 1890424 3028117 1117 1798711 1783272 2 131567	Synechococcales	Synechococcaceae	Synechococcus	Synechococcus sp.	NA	Virus-Host database
KX349315	1063215675	2928626	Cyanophage S-RIM12_RW_14_0101	2928626 2734097 2733098 2946160 2731619 2731618 2731360 2731341 10239	NA	Kyanoviridae	Brizovirus	Brizovirus syn33	NA	Synechococcus sp.	1131	1131 2626047 1129 1890426 1890424 3028117 1117 1798711 1783272 2 131567	Synechococcales	Synechococcaceae	Synechococcus	Synechococcus sp.	NA	Virus-Host database
NC_015285	326783215	444878	Prochlorococcus phage Syn33	444878 2734097 2733098 2946160 2731619 2731618 2731360 2731341 10239	NA	Kyanoviridae	Brizovirus	Brizovirus syn33	NA	Synechococcus sp. WH7803	32051	32051 2626047 1129 1890426 1890424 3028117 1117 1798711 1783272 2 131567	Synechococcales	Synechococcaceae	Synechococcus	Synechococcus sp. WH 7803	NA	Virus-Host database
KX349314	1063215458	2928622	Cyanophage S-RIM12_RW_07_1112	2928622 2734097 2733098 2946160 2731619 2731618 2731360 2731341 10239	NA	Kyanoviridae	Brizovirus	Brizovirus syn33	NA	Synechococcus sp.	1131	1131 2626047 1129 1890426 1890424 3028117 1117 1798711 1783272 2 131567	Synechococcales	Synechococcaceae	Synechococcus	Synechococcus sp.	NA	Virus-Host database
KX349316	1063215891	2928627	Cyanophage S-RIM12_RW_22_0110	2928627 2734097 2733098 2946160 2731619 2731618 2731360 2731341 10239	NA	Kyanoviridae	Brizovirus	Brizovirus syn33	NA	Synechococcus sp.	1131	1131 2626047 1129 1890426 1890424 3028117 1117 1798711 1783272 2 131567	Synechococcales	Synechococcaceae	Synechococcus	Synechococcus sp.	NA	Virus-Host database
KX349309	1063214382	2928614	Cyanophage S-RIM12_Np_22_1112	2928614 2734097 2733098 2946160 2731619 2731618 2731360 2731341 10239	NA	Kyanoviridae	Brizovirus	Brizovirus syn33	NA	Synechococcus sp.	1131	1131 2626047 1129 1890426 1890424 3028117 1117 1798711 1783272 2 131567	Synechococcales	Synechococcaceae	Synechococcus	Synechococcus sp.	NA	Virus-Host database
OQ319120	2449454825	3021412	Synechococcus phage S-BM1	3021412 2752521 2733119 2946160 2731619 2731618 2731360 2731341 10239	NA	Kyanoviridae	Nerrivikvirus	Synechococcus phage S-BM1	NA	Synechococcus sp. WH 7803	32051	32051 2626047 1129 1890426 1890424 3028117 1117 1798711 1783272 2 131567	Synechococcales	Synechococcaceae	Synechococcus	Synechococcus sp. WH 7803	NA	Virus-Host database
KX349283	1063208590	687800	Synechococcus phage S-RIM2	687800 2734125 2733119 2946160 2731619 2731618 2731360 2731341 10239	NA	Kyanoviridae	Nerrivikvirus	Nerrivikvirus srim2	NA	Synechococcus	1129	1129 1890426 1890424 3028117 1117 1798711 1783272 2 131567	Synechococcales	Synechococcaceae	Synechococcus	NA	NA	Virus-Host database
NC_020859	472341954	869662	Synechococcus phage S-RIM2 R1_1999	869662 2734125 2733119 2946160 2731619 2731618 2731360 2731341 10239	NA	Kyanoviridae	Nerrivikvirus	Nerrivikvirus srim2	NA	Synechococcus sp. WH7803	32051	32051 2626047 1129 1890426 1890424 3028117 1117 1798711 1783272 2 131567	Synechococcales	Synechococcaceae	Synechococcus	Synechococcus sp. WH 7803	NA	Virus-Host database
HQ317291	460108463	869663	Synechococcus phage S-RIM2 R9_2006	869663 2734125 2733119 2946160 2731619 2731618 2731360 2731341 10239	NA	Kyanoviridae	Nerrivikvirus	Nerrivikvirus srim2	NA	Synechococcus sp. WH7803	32051	32051 2626047 1129 1890426 1890424 3028117 1117 1798711 1783272 2 131567	Synechococcales	Synechococcaceae	Synechococcus	Synechococcus sp. WH 7803	NA	Virus-Host database
HQ317290	460108220	869661	Synechococcus phage S-RIM2 R21_2007	869661 2734125 2733119 2946160 2731619 2731618 2731360 2731341 10239	NA	Kyanoviridae	Nerrivikvirus	Nerrivikvirus srim2	NA	Synechococcus sp. WH7803	32051	32051 2626047 1129 1890426 1890424 3028117 1117 1798711 1783272 2 131567	Synechococcales	Synechococcaceae	Synechococcus	Synechococcus sp. WH 7803	NA	Virus-Host database
A1	1026924874	1775256	Nostoc phage A1	1775256 2788787 2731619 2731618 2731360 2731341 10239	NA	NA	NA	Nostoc phage A1	NA	Nostoc sp. PCC7210	103690	103690 2593658 1177 1162 1161 3028117 1117 1798711 1783272 2 131567	Nostocales	Nostocaceae	Nostoc	Nostoc sp. PCC 7120 = FACHB-418	NA	Genbank
Alj1	NA	NA	Nostoc phage Alj1	NA	NA	NA	NA	NA	NA	Nostoc sp. PCC7210	103690	103690 2593658 1177 1162 1161 3028117 1117 1798711 1783272 2 131567	Nostocales	Nostocaceae	Nostoc	Nostoc sp. PCC 7120 = FACHB-418	NA	tested in this publication
Lf14	NA	NA	Nostoc phage Lf14	NA	NA	NA	NA	NA	NA	Nostoc sp. PCC7210	103690	103690 2593658 1177 1162 1161 3028117 1117 1798711 1783272 2 131567	Nostocales	Nostocaceae	Nostoc	Nostoc sp. PCC 7120 = FACHB-418	NA	tested in this publication
Hlh1	NA	NA	Nostoc phage Hlh1	NA	NA	NA	NA	NA	NA	Nostoc sp. PCC7210	103690	103690 2593658 1177 1162 1161 3028117 1117 1798711 1783272 2 131567	Nostocales	Nostocaceae	Nostoc	Nostoc sp. PCC 7120 = FACHB-418	NA	tested in this publication
PP395642	2693695510	3126658	Nostoc phage Nsp-JY10	3126658 2788787 2731619 2731618 2731360 2731341 10239	NA	NA	NA	Nostoc phage Nsp-JY10	NA	Nostoc sp.	1180	1180 2593658 1177 1162 1161 3028117 1117 1798711 1783272 2 131567	Nostocales	Nostocaceae	Nostoc	Nostoc sp.	NA	Genbank
PQ195596	2793442854	3279181	Leptolyngbya phage Dor1	3279181 3279180 3153088 3152150 2731619 2731618 2731360 2731341 10239	NA	Saffermanviridae	Morrisvirus	Leptolyngbya phage Dor1	NA	Leptolyngbya boryana IU 594	462680	462680 1184 47251 3081713 1890438 3079749 3028117 1117 1798711 1783272 2 131567	Leptolyngbyales	Leptolyngbyaceae	Leptolyngbya	Leptolyngbya boryana	Leptolyngbya boryana IU 594	Virus-Host database
PP395634	2693694637	3126653	Microcystis phage Mel-JY01	3126653 2788787 2731619 2731618 2731360 2731341 10239	NA	NA	NA	Microcystis phage Mel-JY01	NA	Microcystis elabens	44824	44824 1125 1890449 1118 1301283 3028117 1117 1798711 1783272 2 131567	Chroococcales	Microcystaceae	Microcystis	Microcystis elabens	NA	Virus-Host database
PP110486	2669588200	3117466	Synechococcus phage MC09	3117466 3099894 3044754 2946160 2731619 2731618 2731360 2731341 10239	NA	Kyanoviridae	Makaravirus	Synechococcus phage MC09	NA	Synechococcus sp. MW02	1620844	1620844 2626047 1129 1890426 1890424 3028117 1117 1798711 1783272 2 131567	Synechococcales	Synechococcaceae	Synechococcus	Synechococcus sp. MW02	NA	Virus-Host database
PP110485	2669587953	3117467	Synechococcus phage ME01	3117467 3099894 3044754 2946160 2731619 2731618 2731360 2731341 10239	NA	Kyanoviridae	Makaravirus	Synechococcus phage ME01	NA	Synechococcus sp. MW02	1620844	1620844 2626047 1129 1890426 1890424 3028117 1117 1798711 1783272 2 131567	Synechococcales	Synechococcaceae	Synechococcus	Synechococcus sp. MW02	NA	Virus-Host database
PP110483	2669587466	3117465	Synechococcus phage MA10	3117465 3099894 3044754 2946160 2731619 2731618 2731360 2731341 10239	NA	Kyanoviridae	Makaravirus	Synechococcus phage MA10	NA	Synechococcus sp. MW02	1620844	1620844 2626047 1129 1890426 1890424 3028117 1117 1798711 1783272 2 131567	Synechococcales	Synechococcaceae	Synechococcus	Synechococcus sp. MW02	NA	Virus-Host database
PP395638	2693695201	3126655	Microcystis phage Mwe-JY05	3126655 2788787 2731619 2731618 2731360 2731341 10239	NA	NA	NA	Microcystis phage Mwe-JY05	NA	Microcystis wesenbergii	44823	44823 1125 1890449 1118 1301283 3028117 1117 1798711 1783272 2 131567	Chroococcales	Microcystaceae	Microcystis	Microcystis wesenbergii	NA	Virus-Host database
PP395639	2693695301	3126656	Microcystis phage Mwe-JY07	3126656 2788787 2731619 2731618 2731360 2731341 10239	NA	NA	NA	Microcystis phage Mwe-JY07	NA	Microcystis wesenbergii	44823	44823 1125 1890449 1118 1301283 3028117 1117 1798711 1783272 2 131567	Chroococcales	Microcystaceae	Microcystis	Microcystis wesenbergii	NA	Virus-Host database
PP395640	2693695369	3126657	Microcystis phage Mwe-JY08	3126657 2788787 2731619 2731618 2731360 2731341 10239	NA	NA	NA	Microcystis phage Mwe-JY08	NA	Microcystis wesenbergii	44823	44823 1125 1890449 1118 1301283 3028117 1117 1798711 1783272 2 131567	Chroococcales	Microcystaceae	Microcystis	Microcystis wesenbergii	NA	Virus-Host database
PP438409	2725670156	3128136	Leptolyngbya phage Lsp-JY17	3128136 2852913 2843476 3152150 2731619 2731618 2731360 2731341 10239	NA	Saffermanviridae	Wumptrevirus	Leptolyngbya phage Lsp-JY17	NA	Leptolyngbya boryana	1184	1184 47251 3081713 1890438 3079749 3028117 1117 1798711 1783272 2 131567	Leptolyngbyales	Leptolyngbyaceae	Leptolyngbya	Leptolyngbya boryana	NA	Virus-Host database
PP438405	2725669948	3128133	Leptolyngbya phage Lbo-JY12	3128133 2852913 2843476 3152150 2731619 2731618 2731360 2731341 10239	NA	Saffermanviridae	Wumptrevirus	Leptolyngbya phage Lbo-JY12	NA	Leptolyngbya boryana	1184	1184 47251 3081713 1890438 3079749 3028117 1117 1798711 1783272 2 131567	Leptolyngbyales	Leptolyngbyaceae	Leptolyngbya	Leptolyngbya boryana	NA	Virus-Host database
PP395637	2693695129	3126651	Microcystis phage Mae-JY04	3126651 2788787 2731619 2731618 2731360 2731341 10239	NA	NA	NA	Microcystis phage Mae-JY04	NA	Microcystis aeruginosa	1126	1126 1125 1890449 1118 1301283 3028117 1117 1798711 1783272 2 131567	Chroococcales	Microcystaceae	Microcystis	Microcystis aeruginosa	NA	Virus-Host database
PP395636	2693695005	3126654	Microcystis phage Mel-JY03	3126654 2788787 2731619 2731618 2731360 2731341 10239	NA	NA	NA	Microcystis phage Mel-JY03	NA	Microcystis elabens	44824	44824 1125 1890449 1118 1301283 3028117 1117 1798711 1783272 2 131567	Chroococcales	Microcystaceae	Microcystis	Microcystis elabens	NA	Virus-Host database
PP395641	2693695438	3126652	Microcystis phage Mae-JY09	3126652 2788787 2731619 2731618 2731360 2731341 10239	NA	NA	NA	Microcystis phage Mae-JY09	NA	Microcystis aeruginosa	1126	1126 1125 1890449 1118 1301283 3028117 1117 1798711 1783272 2 131567	Chroococcales	Microcystaceae	Microcystis	Microcystis aeruginosa	NA	Virus-Host database
PP395635	2693694904	3126650	Microcystis phage Mae-JY02	3126650 2788787 2731619 2731618 2731360 2731341 10239	NA	NA	NA	Microcystis phage Mae-JY02	NA	Microcystis aeruginosa	1126	1126 1125 1890449 1118 1301283 3028117 1117 1798711 1783272 2 131567	Chroococcales	Microcystaceae	Microcystis	Microcystis aeruginosa	NA	Virus-Host database
NC_048102	1842028974	2484640	Synechococcus phage S-P4	2484640 2734113 2733109 2946160 2731619 2731618 2731360 2731341 10239	NA	Kyanoviridae	Leucotheavirus	Leucotheavirus sp4	NA	Synechococcus sp. WH 7803	32051	32051 2626047 1129 1890426 1890424 3028117 1117 1798711 1783272 2 131567	Synechococcales	Synechococcaceae	Synechococcus	Synechococcus sp. WH 7803	NA	Virus-Host database
NC_021559	514231256	536453	Prochlorococcus phage P-SSM3	536453 2845938 2843447 2946160 2731619 2731618 2731360 2731341 10239	NA	Kyanoviridae	Ronodorvirus	Ronodorvirus pssm3	NA	Prochlorococcus marinus	1219	1219 1218 2881426 1890424 3028117 1117 1798711 1783272 2 131567	Synechococcales	Prochlorococcaceae	Prochlorococcus	Prochlorococcus marinus	NA	Virus-Host database
NC_021536	514051046	754039	Synechococcus phage S-IOM18	754039 2734147 2733135 2946160 2731619 2731618 2731360 2731341 10239	NA	Kyanoviridae	Tefnutvirus	Tefnutvirus siom18	NA	Synechococcus sp. WH 7803	32051	32051 2626047 1129 1890426 1890424 3028117 1117 1798711 1783272 2 131567	Synechococcales	Synechococcaceae	Synechococcus	Synechococcus sp. WH 7803	NA	Virus-Host database
NC_021072	481019412	536474	Synechococcus phage Syn30	536474 2734114 2733109 2946160 2731619 2731618 2731360 2731341 10239	NA	Kyanoviridae	Leucotheavirus	Leucotheavirus syn30	NA	Synechococcus sp. WH 7803	32051	32051 2626047 1129 1890426 1890424 3028117 1117 1798711 1783272 2 131567	Synechococcales	Synechococcaceae	Synechococcus	Synechococcus sp. WH 7803	NA	Virus-Host database
NC_020835	472339117	885867	Prochlorococcus phage P-SSP10	885867 2733964 2731981 2731643 2731619 2731618 2731360 2731341 10239	NA	Autographiviridae	Tangaroavirus	Tangaroavirus PSSP10	NA	Prochlorococcus marinus	1219	1219 1218 2881426 1890424 3028117 1117 1798711 1783272 2 131567	Synechococcales	Prochlorococcaceae	Prochlorococcus	Prochlorococcus marinus	NA	Virus-Host database
NC_020838	472339613	754040	Synechococcus phage S-RIP2	754040 2733955 2731974 2731643 2731619 2731618 2731360 2731341 10239	NA	Autographiviridae	Sednavirus	Sednavirus SRIP2	NA	Synechococcus sp. WH 7803	32051	32051 2626047 1129 1890426 1890424 3028117 1117 1798711 1783272 2 131567	Synechococcales	Synechococcaceae	Synechococcus	Synechococcus sp. WH 7803	NA	Virus-Host database
NC_020847	472340512	889955	Prochlorococcus phage MED4-184	889955 2788787 2731619 2731618 2731360 2731341 10239	NA	NA	NA	Prochlorococcus phage MED4-184	NA	Prochlorococcus	1218	1218 2881426 1890424 3028117 1117 1798711 1783272 2 131567	Synechococcales	Prochlorococcaceae	Prochlorococcus	NA	NA	Virus-Host database
NC_020851	472340845	754042	Synechococcus phage S-SKS1	754042 2734116 2733111 2731619 2731618 2731360 2731341 10239	NA	NA	Llyrvirus	Llyrvirus SSKS1	NA	Synechococcus sp. WH 7803	32051	32051 2626047 1129 1890426 1890424 3028117 1117 1798711 1783272 2 131567	Synechococcales	Synechococcaceae	Synechococcus	Synechococcus sp. WH 7803	NA	Virus-Host database
NC_020854	472341456	889953	Cyanophage KBS-S-2A	889953 2788787 2731619 2731618 2731360 2731341 10239	NA	NA	NA	Cyanophage KBS-S-2A	NA	Synechococcus sp. WH 7803	32051	32051 2626047 1129 1890426 1890424 3028117 1117 1798711 1783272 2 131567	Synechococcales	Synechococcaceae	Synechococcus	Synechococcus sp. WH 7803	NA	Virus-Host database
NC_020857	472341815	889954	Cyanophage MED4-117	889954 2788787 2731619 2731618 2731360 2731341 10239	NA	NA	NA	Cyanophage MED4-117	NA	Prochlorococcus sp. MED4	59919	59919 142479 1219 1218 2881426 1890424 3028117 1117 1798711 1783272 2 131567	Synechococcales	Prochlorococcaceae	Prochlorococcus	Prochlorococcus marinus	Prochlorococcus marinus subsp. pastoris str. CCMP1986	Virus-Host database
NC_020865	472342816	889951	Cyanophage KBS-P-1A	889951 2733955 2731974 2731643 2731619 2731618 2731360 2731341 10239	NA	Autographiviridae	Sednavirus	Sednavirus SRIP2	NA	Synechococcus sp. WH 7803	32051	32051 2626047 1129 1890426 1890424 3028117 1117 1798711 1783272 2 131567	Synechococcales	Synechococcaceae	Synechococcus	Synechococcus sp. WH 7803	NA	Virus-Host database
NC_020867	472342931	754041	Synechococcus phage S-RIP1	754041 2733924 2731947 2731643 2731619 2731618 2731360 2731341 10239	NA	Autographiviridae	Kajamvirus	Kajamvirus SRIP1	NA	Synechococcus sp. WH 8101	59932	59932 2626047 1129 1890426 1890424 3028117 1117 1798711 1783272 2 131567	Synechococcales	Synechococcaceae	Synechococcus	Synechococcus sp. WH 8101	NA	Virus-Host database
NC_020872	472343131	616674	Cyanophage SS120-1	616674 2733894 2731931 2731643 2731619 2731618 2731360 2731341 10239	NA	Autographiviridae	Banchanvirus	Banchanvirus SS1201	NA	Prochlorococcus marinus subsp. marinus str. CCMP1375	167539	167539 142554 1219 1218 2881426 1890424 3028117 1117 1798711 1783272 2 131567	Synechococcales	Prochlorococcaceae	Prochlorococcus	Prochlorococcus marinus	Prochlorococcus marinus subsp. marinus str. CCMP1375	Virus-Host database
NC_020874	472343184	382273	Prochlorococcus phage P-SSP3	382273 2733966 2731985 2731643 2731619 2731618 2731360 2731341 10239	NA	Autographiviridae	Tritonvirus	Tritonvirus PSSP3	NA	Prochlorococcus marinus	1219	1219 1218 2881426 1890424 3028117 1117 1798711 1783272 2 131567	Synechococcales	Prochlorococcaceae	Prochlorococcus	Prochlorococcus marinus	NA	Virus-Host database
NC_020875	472343238	536466	Synechococcus phage S-SSM4	536466 2955958 2948729 2946160 2731619 2731618 2731360 2731341 10239	NA	Kyanoviridae	Greenvirus	Greenvirus ssm4	NA	Synechococcus sp. WH 8018	166322	166322 2626047 1129 1890426 1890424 3028117 1117 1798711 1783272 2 131567	Synechococcales	Synechococcaceae	Synechococcus	Synechococcus sp. WH 8018	NA	Virus-Host database
NC_020878	472343459	382262	Prochlorococcus phage P-GSP1	382262 2733930 2731955 2731643 2731619 2731618 2731360 2731341 10239	NA	Autographiviridae	Lingvirus	Lingvirus PGSP1	NA	Prochlorococcus marinus subsp. pastoris str. CCMP1986	59919	59919 142479 1219 1218 2881426 1890424 3028117 1117 1798711 1783272 2 131567	Synechococcales	Prochlorococcaceae	Prochlorococcus	Prochlorococcus marinus	Prochlorococcus marinus subsp. pastoris str. CCMP1986	Virus-Host database
PQ638372	2869628431	3384917	Synechococcus phage WH25-B	3384917 2960609 2946160 2731619 2731618 2731360 2731341 10239	NA	Kyanoviridae	NA	Synechococcus phage WH25-B	NA	Synechococcus sp. WH 7803	3384917	3384917 2960609 2946160 2731619 2731618 2731360 2731341 10239	Synechococcales	Synechococcaceae	Synechococcus	Synechococcus sp. WH 7803	NA	Virus-Host database
OQ560327	2496141310	3038322	Microcystis phage Mel-Yong916-1	3038322 12333 10239	NA	NA	NA	Microcystis phage Mel-Yong916-1	NA	Microcystis elabens	3038322	3038322 12333 10239	Chroococcales	Microcystaceae	Microcystis	Microcystis elabens	NA	Genbank
OP834087	2395604111	2996064	Anabaena phage YongM2	2996064 12333 10239	NA	NA	NA	Anabaena phage YongM2	NA	Anabaena	2996064	2996064 12333 10239	Nostocales	Nostocaceae	Anabaena	NA	NA	Virus-Host database
OP828577	2384764685	2996070	Plectonema phage Lbo240-yong2	2996070 12333 10239	NA	NA	NA	Plectonema phage Lbo240-yong2	NA	Leptolyngya boryana	2996070	2996070 12333 10239	Leptolyngbyales	Leptolyngbyaceae	Leptolyngbya	Leptolyngbya boryana	NA	Virus-Host database
OR075997	2577270861	3053378	Synechococcus phage Sc-Yong805-2	3053378 12333 10239	NA	NA	NA	Synechococcus phage Sc-Yong805-2	NA	Synechococcus elongatus PCC 7942 = FACHB-805	3053378	3053378 12333 10239	Synechococcales	Synechococcaceae	Synechococcus	Synechococcus elongatus	Synechococcus elongatus PCC 7942 = FACHB-805	Virus-Host database

## Sheet: Table S6
Supplementary Table S6. Phage gene clusters.
Cluster	members	add_info	no_members	no_of_phages	mean_AAlen	gene group	specific gene group	function	*evidence
P001	A-1-L000105; A-Alj1000109; A-Hlh1000108; A-Lfl4000001; AND75488.1; QLF85077.1; QVQ57008.1; WAK45731.1; XAI95754.1	NA	9	9	452	phage body	terminase	terminase large subunit (TerL)	1		*1: Publication Yu, R. C., Yang, F., Zhang, H. Y., Hou, P., Du, K., Zhu, J., ... & Zhou, C. Z. (2024). Structure of the intact tail machine of Anabaena myophage A-1 (L). Nature Communications, 15(1), 2654.
P002	A-1-L000001; A-Alj1000001; A-Hlh1000001; A-Lfl4000002; AND75489.1; QLF85078.1; QVQ57009.1; WAK45732.1; XAI95755.1	NA	9	9	527	phage body	head	portal protein	1		2: blastp
P003	A-1-L000002; A-Alj1000002; A-Hlh1000002; A-Lfl4000003; AND75490.1; QLF85079.1; QVQ57010.1; WAK45733.1; XAI95756.1	NA	9	9	234	phage body	head	outer membrane protein; Scaffolding protein	1, 2		3: HHpred prediction
P004	A-1-L000003; A-Alj1000003; A-Hlh1000003; A-Lfl4000004; AND75491.1; QLF85080.1; QVQ57011.1; WAK45734.1; XAI95757.1	NA	9	9	364	phage body	head	major capsid protein	1		4: Alphafold
P005	A-1-L000004; A-Alj1000004; A-Hlh1000004; A-Lfl4000005; AND75492.1; QLF85081.1; QVQ57012.1; WAK45735.1; XAI95758.1	Putative capsid assembly protein	9	9	162	phage body	neck	neck protein	1		5: DeepTMHMM
P006	A-1-L000005; A-Alj1000005; A-Hlh1000005; A-Lfl4000006; AND75493.1; QLF85082.1; QVQ57013.1; WAK45736.1; XAI95759.1	synteny with phage scaffolding, capsid, phage tail tube and phage tail sheath family proteins	9	9	107	phage body	neck	Putative capsid assembly protein	1
P007	A-1-L000006; A-Alj1000006; A-Hlh1000006; A-Lfl4000007; AND75494.1; QLF85083.1; QVQ57014.1; WAK45737.1; XAI95760.1	NA	9	9	133	phage body	neck	neck protein	1
P008	A-1-L000007; A-Alj1000007; A-Hlh1000007; A-Lfl4000008; AND75495.1; QLF85084.1; QVQ57015.1; WAK45738.1; XAI95761.1	NA	9	9	239	phage body	Tail	Terminator	1
P009	A-1-L000008; A-Alj1000008; A-Hlh1000008; A-Lfl4000009; AND75496.1; QLF85085.1; QVQ57016.1; WAK45739.1; XAI95762.1	NA	9	9	506	phage body	Tail	tail sheath protein	1
P010	A-1-L000009; A-Alj1000009; A-Hlh1000009; A-Lfl4000010; AND75497.1; QLF85086.1; QVQ57017.1; WAK45740.1; XAI95763.1	NA	9	9	167	phage body	Tail	tail tube protein	1
P011	A-1-L000010; A-1-L000011; A-Alj1000010; A-Alj1000011; A-Hlh1000010; A-Hlh1000011; A-Lfl4000011; A-Lfl4000012; AND75498.1; AND75499.1; Elbi_e14; QLF85087.1; QVQ57018.1; QVQ57019.1; WAK45741.1; WAK45742.1; XAI95764.1; XAI95765.1	The annotation of QVQ57019.1 in phage Elbi [MZ078141.1] is a fusion of two ORFs. Therefore, all homologs of these genes are associated in one cluster.	18	9	117	phage body	Tail	tail assembly chaperone	1
P013	A-1-L000012; A-Alj1000012; A-Hlh1000012; A-Lfl4000013; AND75500.1; QLF85088.1; QVQ57020.1; WAK45743.1; XAI95766.1	NA	9	9	689	phage body	Tail	tape measure protein	1
P014	A-1-L000014; A-Alj1000014; A-Hlh1000014; QVQ57027.1; XAI95767.1	NA	5	5	114	NA	NA	hypothetical protein
P015	A-1-L000015; A-Alj1000015; A-Hlh1000015; A-Lfl4000015; AND75502.1; QLF85091.1; QVQ57023.1; WAK45745.1; XAI95768.1	NA	9	9	899	phage body	Tail	hub protein; Lysozyme-like domain, rare lipoprotein A	1
P016	A-1-L000016; A-Alj1000016; A-Hlh1000017; A-Lfl4000017; AND75503.1; QLF85092.1; QVQ57024.1; WAK45746.1; XAI95769.1	NA	9	9	155	phage body	Tail	Baseplate protein	1
P017	A-1-L000017; A-Alj1000017; A-Hlh1000018; A-Lfl4000018; Dfl-JY23_e016; WAK45747.1; YongM_e016	NA	7	7	91	NA	NA	hypothetical protein
P018	A-1-L000018; A-Alj1000018; A-Hlh1000019; A-Lfl4000019; AND75505.1; QLF85093.1; QVQ57026.1; WAK45748.1; XAI95770.1	NA	9	9	282	phage body	Tail	Tube initiator protein	1
P019	A-1-L000019; A-Alj1000021; A-Hlh1000021; A-Lfl4000021; AND75510.1; QLF85094.1; QVQ57028.1; WAK45750.1; XAI95772.1	Putative signal peptide	9	9	65	Tmhelix-containing protein	NA	transmembrane-domain-containing protein	5
P020	A-1-L000020; A-Alj1000023; A-Hlh1000023; A-Lfl4000023; AND75509.1; QLF85095.1; QVQ57029.1; WAK45752.1; XAI95773.1	NA	9	9	56	NA	NA	hypothetical protein
P021	A-1-L000022	NA	1	1	46	NA	NA	hypothetical protein
P022	A-1-L000023; A-Alj1000026; A-Hlh1000026; A-Lfl4000026; AND75506.1; QLF85097.1; QVQ57032.1; WAK45755.1; XAI95777.1	NA	9	9	297	replication	replication	DNA polymerase III subunit alpha; exonuclease RNAse T and DNA polymerase	1
P023	A-1-L000024	NA	1	1	145	replication	replication	Deoxyribosyltransferase	1
P024	A-1-L000025; A-Alj1000028; A-Hlh1000028; A-Lfl4000028; AND75511.1; QLF85098.1; QVQ57033.1; WAK45757.1; XAI95778.1	NA	9	9	135	regulator	regulator transcription factor	response regulator; transcription factor	1, 2
P025	A-1-L000027; A-Alj1000077; A-Hlh1000029; A-Lfl4000078; AND75512.1; QLF85141.1; QVQ57083.1; WAK45806.1; XAI95724.1	NA	9	9	270	phage body	Tail	central spike protein	1
P026	A-1-L000028; A-1-L000029; A-Alj1000076; A-Hlh1000031; A-Lfl4000076; AND75514.1; QLF85140.1; QVQ57082.1; WAK45805.1; XAI95723.1	the gene is split into two ORFs in A1	10	9	139	NA	NA	hypothetical protein
P028	A-1-L000030; QLF85139.1; WAK45804.1	NA	3	3	72	NA	NA	hypothetical protein
P029	A-1-L000031; A-Alj1000075; A-Hlh1000032; A-Lfl4000075; AND75515.1; QLF85137.1; QVQ57081.1; WAK45803.1; XAI95722.1	Putative signal peptide	9	9	109	NA	NA	hypothetical protein
P030	A-1-L000032; A-Alj1000074; A-Hlh1000033; A-Lfl4000074; AND75516.1; QLF85136.1; QVQ57080.1; WAK45802.1; XAI95721.1	NA	9	9	113	phage body	Tail	Sheath initiator protein	1
P031	A-1-L000033; A-Alj1000073; A-Hlh1000034; A-Lfl4000073; AND75517.1; QLF85135.1; QVQ57079.1; WAK45801.1; XAI95719.1	NA	9	9	384	phage body	Tail	baseplate wedge protein	1
P032	A-1-L000034; A-Alj1000072; A-Hlh1000035; A-Lfl4000072; AND75518.1; QLF85134.1; QVQ57078.1; WAK45800.1; XAI95718.1	NA	9	9	191	phage body	Tail	baseplate wedge protein	1
P033	A-1-L000035; A-Alj1000071; A-Hlh1000036; A-Lfl4000071; AND75519.1; QLF85133.1; QVQ57077.1; WAK45799.1; XAI95717.1	NA	9	9	452	phage body	Tail	Short tail fiber [STF]	1
P034	A-1-L000036; A-Alj1000070; A-Hlh1000037; A-Lfl4000070; AND75520.1; QLF85132.1; QVQ57076.1; WAK45798.1; XAI95716.1	NA	9	9	379	phage body	Tail	Long tail fiber [LTF]	1
P035	A-1-L000038; A-Alj1000067; A-Hlh1000040; A-Lfl4000067; WAK45796.1; XAI95713.1	Similar N-terminal (50 nt) to P059	6	6	123	NA	NA	hypothetical protein
P036	A-1-L000039	NA	1	1	102	regulator	regulator transcription factor	Transcription elongation factor SPT5	1
P037	A-1-L000041; A-Alj1000065; A-Hlh1000041; A-Lfl4000066; AND75521.1; QLF85130.1; QVQ57074.1; WAK45794.1; XAI95712.1	similar to Alr7572	9	9	650	replication	replication	DNA polymerase delta catalytic subunit	1
P038	A-1-L000042; A-Alj1000064; A-Hlh1000042; A-Lfl4000065; QLF85129.1; WAK45793.1	NA	6	6	61	NA	NA	hypothetical protein
P039	A-1-L000043; A-Alj1000063; A-Hlh1000043; A-Lfl4000064; WAK45792.1	potential Acr candidate	5	5	70	regulator	regulator transcription factor	tTranscriptional co-activator	1
P040	A-1-L000044; A-Alj1000062; A-Hlh1000044; A-Lfl4000063; AND75523.1; QLF85128.1; WAK45790.1; XAI95711.1	NA	8	8	68	NA	NA	hypothetical protein
P041	A-1-L000045; A-Alj1000061; A-Hlh1000045; A-Lfl4000062; AND75525.1; QLF85127.1; QVQ57070.1; WAK45789.1; XAI95709.1	similar to alr7157	9	9	470	replication	helicase	ATP-dependent DNA helicase; Type III restriction enzyme, DEAD-box helicase	1, 2
P042	A-1-L000046; A-Alj1000060; A-Hlh1000046; A-Lfl4000061; AND75526.1; AND75527.1; QLF85126.1; QVQ57069.1; WAK45788.1	NA	9	8	71	NA	NA	hypothetical protein
P043	A-1-L000047; A-Alj1000058; A-Lfl4000059; AND75528.1; QLF85125.1; QVQ57067.1; WAK45787.1; XAI95708.1	NA	8	8	105	host infection	NA	PVL ORF-50-like family protein	1
P044	A-1-L000049; A-Alj1000055; A-Hlh1000050; A-Lfl4000056; AND75529.1; QLF85124.1; QVQ57065.1; WAK45784.1; XAI95707.1	NA	9	9	361	NA	NA	hypothetical protein
P045	A-1-L000050; A-Alj1000054; A-Hlh1000051; A-Lfl4000055; AND75530.1; QLF85123.1; QVQ57063.1; WAK45783.1; XAI95706.1	NA	9	9	527	Tmhelix-containing protein	DNA translocase FtsK	transmembrane-domain-containing protein	5
P046	A-1-L000051; A-Alj1000052; A-Hlh1000053; A-Lfl4000053; AND75531.1; QLF85122.1; QVQ57062.1; WAK45781.1; XAI95704.1	NA	9	9	90	Tmhelix-containing protein	NA	transmembrane-domain-containing protein	5
P047	A-1-L000052; A-Alj1000051; A-Hlh1000054; A-Lfl4000052; Dfl-JY23_e050; QLF85121.1; WAK45780.1	NA	7	7	63	NA	NA	hypothetical protein
P048	A-1-L000053; A-Alj1000050; A-Hlh1000055; A-Lfl4000051; AND75533.1; QLF85119.1; QVQ57057.1; WAK45779.1; XAI95703.1	NA	9	9	150	NA	NA	hypothetical protein
P049	A-1-L000054; A-Alj1000049; A-Hlh1000056; A-Lfl4000050; AND75534.1; QLF85118.1; QVQ57056.1; WAK45778.1; XAI95702.1	NA	9	9	85	Tmhelix-containing protein	NA	transmembrane-domain-containing protein	5
P050	A-1-L000055; A-Alj1000047; A-Hlh1000058; A-Lfl4000048; AND75535.1; QLF85117.1; QVQ57055.1; WAK45777.1; XAI95701.1	structural similarity to Apolipoprotein A-IV helical domain	9	9	196	NA	NA	hypothetical protein
P051	A-1-L000056; A-Alj1000046; A-Hlh1000059; A-Lfl4000047; AND75536.1; QLF85116.1; QVQ57054.1; WAK45776.1; XAI95700.1	NA	9	9	170	regulator	regulator	Calcium-dependent protein kinase 2	1
P052	A-1-L000057	NA	1	1	296	regulator	regulator	antirepressor	1, 2
P053	A-1-L000058	NA	1	1	47	regulator	regulator transcription factor	DNA binding protein	1
P054	A-1-L000059	Putative signal peptide	1	1	78	Tmhelix-containing protein	NA	transmembrane-domain-containing protein	5
P055	A-1-L000060; A-Alj1000044; A-Hlh1000061; A-Lfl4000045; N1_e058; QVQ57050.1; WAK45774.1; YongM_e058	NA	8	8	84	Tmhelix-containing protein	NA	transmembrane-domain-containing protein	5
P056	A-1-L000061; A-Alj1000043; A-Hlh1000062; A-Lfl4000044; AND75538.1; QVQ57049.1; XAI95698.1; QLF85114.1; WAK45773.1	NA	9	9	84	Tmhelix-containing protein	NA	transmembrane-domain-containing protein	5
P057	A-1-L000062; A-Alj1000042; A-Hlh1000063; A-Lfl4000043; AND75539.1; QLF85113.1; QVQ57048.1; WAK45772.1; XAI95697.1	similar to DNA N-6-adenine-methyltransferase in Nostoc sp. [WP_189523432]	9	9	205	replication	replication	DNA N-6-adenine-methyltransferase	1, 2
P058	A-1-L000064; QLF85111.1; WAK45770.1; XAI95695.1	NA	4	4	92	NA	NA	hypothetical protein
P059	A-1-L000065; A-Alj1000039; A-Hlh1000066; A-Lfl4000040; AND75540.1; QLF85110.1; QVQ57045.1; WAK45769.1; XAI95694.1	similar N-terminal (50 nt) to P035	9	9	278	NA	NA	hypothetical protein
P060	A-1-L000066; A-Alj1000038; A-Hlh1000067; A-Lfl4000039; QLF85109.1; WAK45767.1; XAI95693.1	NA	7	7	82	NA	NA	hypothetical protein
P061	A-1-L000067; QLF85108.1; WAK45766.1	NA	3	3	75	NA	NA	hypothetical protein
P062	A-1-L000068; A-Alj1000037; A-Hlh1000068; A-Lfl4000038; AND75542.1; QLF85106.1; QVQ57043.1; WAK45764.1; XAI95691.1	NA	9	9	178	NA	NA	hypothetical protein
P063	A-1-L000069; A-Alj1000035; A-Hlh1000070; A-Lfl4000036; N1_e067; QLF85105.1; QVQ57041.1; WAK45763.1; XAI95690.1	NA	9	9	139	NA	NA	hypothetical protein
P064	A-1-L000070; A-Alj1000034; A-Hlh1000071; A-Lfl4000035; AND75543.1; QLF85104.1; QVQ57040.1; WAK45762.1; XAI95688.1	NA	9	9	79	regulator	regulator transcription factor	ASCH domain protein; RNA-binding protein	1, 2
P065	A-1-L000071; A-Alj1000033; A-Hlh1000072; A-Lfl4000034; AND75545.1; QLF85103.1; QVQ57039.1; WAK45761.1; XAI95687.1	QLF85103.1 has limited similarity to others	9	9	125	NA	NA	hypothetical protein
P066	A-1-L000072; A-Alj1000032; A-Hlh1000073; A-Lfl4000033; N1_e070; QLF85102.1; QVQ57038.1; WAK45760.1; XAI95686.1	sequence similarity to P125	9	9	187	host degradation	nuclease	HNH endonuclease	1
P067	A-1-L000073; A-Alj1000031; A-Hlh1000074; A-Lfl4000032; AND75547.1; QLF85101.1; QVQ57037.1; WAK45759.1; XAI95685.1	no homologs beyond these phages	9	9	131	regulator	regulator transcription factor	DNA-binding domain(AP2)/Transcriptional Regulator	1
P068	A-1-L000074; A-Alj1000030; A-Hlh1000075; A-Lfl4000031; AND75548.1; QLF85100.1; QVQ57036.1; WAK45758.1; XAI95684.1	NA	9	9	1011	replication	Primase	DNA primase; virulence-associated protein E	1
P069	A-1-L000075; A-Alj1000029; A-Hlh1000076; A-Lfl4000030; QVQ57034.1	low conservation between genes	5	5	159	regulator	regulator	antirepressor; KilAC domain protein	2
P070	A-1-L000076	sequence identical to Alr4104/All3986; directly next to RE possible transposon	1	1	402	recombinase	transposase TnpB	transposase	1
P071	A-1-L000079; A-Alj1000078; A-Hlh1000077; A-Lfl4000080; AND75549.1; QLF85051.1; QVQ57085.1; WAK45701.1; XAI95725.1	similar to all4708	9	9	212	replication	Thymidylate kinase	thymidylate kinase	1
P072	A-1-L000080; A-Alj1000080; A-Hlh1000079; A-Lfl4000082; AND75550.1; QLF85053.1; QVQ57086.1; WAK45703.1; XAI95726.1; QVQ57087.1	two ORFs in Elbi phage, Putative signal peptide	10	9	133	host infection	Surface-adhesin protein E	Surface-adhesin protein E	1.3
P073	A-1-L000081; A-Alj1000081; A-Hlh1000080; A-Lfl4000083; N1_e078; QLF85054.1; QVQ57088.1; WAK45704.1; XAI95727.1	NA	9	9	144	host degradation	nuclease	HNH endonuclease	1
P074	A-1-L000082; A-Alj1000083; A-Hlh1000082; A-Lfl4000085; AND75552.1; WAK45706.1; XAI95728.1	NA	7	7	119	NA	NA	hypothetical protein
P075	A-1-L000083; A-Alj1000085; A-Hlh1000084; A-Lfl4000087; AND75555.1; QLF85055.1; QVQ57093.1; WAK45707.1; XAI95729.1	similar to alr2276; best hit outside these phages: WP_180665407 in Herbaspirillum	9	9	348	expression	cytosine-specific methyltransferase	DNA-cytosine methyltransferase	1
P076	A-1-L000084; A-Alj1000086; A-Hlh1000085; A-Lfl4000088; AND75556.1; QLF85056.1; QVQ57094.1; WAK45708.1; XAI95730.1	NA	9	9	137	NA	NA	hypothetical protein
P077	A-1-L000085; A-Alj1000087; A-Hlh1000086; A-Lfl4000089; AND75557.1; QLF85057.1; QVQ57095.1; WAK45709.1; XAI95731.1	NA	9	9	52	NA	NA	hypothetical protein
P078	A-1-L000086; A-Alj1000088; A-Hlh1000087; A-Lfl4000090; AND75558.1; QLF85058.1; QVQ57096.1; WAK45710.1; XAI95732.1	NA	9	9	70	Tmhelix-containing protein	NA	transmembrane-domain-containing protein	5
P079	A-1-L000087; A-Alj1000089; A-Hlh1000088; A-Lfl4000091; AND75560.1; QLF85059.1; QVQ57097.1; WAK45712.1; XAI95734.1	NA	9	9	138	NA	NA	hypothetical protein
P080	A-1-L000088; A-Alj1000090; A-Hlh1000089; A-Lfl4000092; QLF85060.1; QVQ57098.1	NA	6	6	200	phage body	neck fiber	neck fiber protein	1
P081	A-1-L000089; A-Alj1000091; A-Alj1000093; A-Hlh1000090; A-Hlh1000092; A-Lfl4000093; A-Lfl4000095; AND75563.1; QLF85061.1; QLF85063.1; QVQ57099.1; QVQ57101.1; WAK45715.1; XAI95737.1	NA	14	9	176	phage body	neck fiber	neck fiber protein	1
P082	A-1-L000090; A-Alj1000094; A-Hlh1000093; A-Lfl4000096; AND75564.1; QLF85064.1; QVQ57102.1; WAK45716.1; XAI95739.1	NA	9	9	250	phage body	neck fiber	neck fiber protein	1
P083	A-1-L000091; A-Alj1000095; A-Hlh1000094; A-Lfl4000097; AND75565.1; QVQ57103.1; WAK45717.1; XAI95740.1; YongM_e088	NA	9	9	95	Tmhelix-containing protein	Cell division protein FtsB	Cell division protein FtsB; transmembrane-domain-containing protein	1, 3, 5
P084	A-1-L000092; A-Alj1000096; A-Hlh1000095; A-Lfl4000098; AND75566.1; QLF85065.1; QVQ57104.1; WAK45718.1; XAI95741.1	similar to all0066	9	9	193	expression	Cytosine-specific methyltransferase	dCTP deaminase; deoxycytidine triphosphate deaminase; dUTPase superfamily	1, 2
P085	A-1-L000093; A-Alj1000097; A-Hlh1000096; A-Lfl4000099; AND75567.1; QLF85066.1; QVQ57105.1; WAK45719.1; XAI95742.1	NA	9	9	415	cell division	Stage 0 sporulation protein J/ParB family protein2	ParB-like partition protein; stage 0 sporulation protein J	1, 2
P086	A-1-L000094; A-Alj1000098; A-Hlh1000097; A-Lfl4000100; AND75568.1; QLF85067.1; QVQ57106.1; WAK45720.1; XAI95743.1	NA	9	9	153	NA	NA	hypothetical protein
P087	A-1-L000095; A-Alj1000099; A-Hlh1000098; A-Lfl4000101; QLF85068.1; WAK45721.1; XAI95744.1	sequence similar to WP_165093855 Paenibacillus apii	7	7	295	expression	cytosine-specific methyltransferase	DNA methylase; S-adenosyl-L-methionine-dependent methyltransferase	1, 2
P088	A-1-L000096; A-Alj1000100; A-Hlh1000099; A-Lfl4000102; AND75569.1; QLF85069.1; QVQ57107.1; WAK45722.1; XAI95745.1	NA	9	9	140	replication	replication	endodeoxyribonuclease RusA	1, 2
P089	A-1-L000097; A-Alj1000101; A-Hlh1000100; A-Lfl4000103; AND75570.1; QLF85070.1; QVQ57108.1; WAK45723.1; XAI95746.1	NA	9	9	113	NA	NA	hypothetical protein
P090	A-1-L000099; A-Alj1000103; A-Hlh1000102; A-Lfl4000105; AND75572.1; QLF85071.1; QVQ57110.1; WAK45725.1; XAI95748.1	NA	9	9	259	replication	Thymidylate synthase	thymidylate synthase	1
P091	A-1-L000100; A-Alj1000104; A-Hlh1000103; A-Lfl4000106; AND75573.1; QLF85072.1; QVQ57111.1; WAK45726.1; XAI95749.1	NA	9	9	103	NA	NA	hypothetical protein
P092	A-1-L000101; A-Alj1000105; A-Hlh1000104; A-Lfl4000107; AND75574.1; QLF85073.1; QVQ57112.1; WAK45727.1; XAI95750.1	NA	9	9	210	regulator	regulator transcription factor	transcription factor	1
P093	A-1-L000102; A-Alj1000106; A-Hlh1000105; A-Lfl4000108; AND75575.1; QLF85074.1; QVQ57113.1; WAK45728.1; XAI95751.1	NA	9	9	68	NA	NA	hypothetical protein
P094	A-1-L000103; A-Alj1000107; A-Hlh1000106; A-Lfl4000109; AND75576.1; QLF85075.1; QVQ57006.1; WAK45729.1; XAI95752.1	NA	9	9	126	NA	NA	hypothetical protein
P095	A-1-L000104; A-Alj1000108; A-Hlh1000107; A-Lfl4000110; N1_e101; QLF85076.1; QVQ57007.1; WAK45730.1; XAI95753.1	NA	9	9	161	phage body	terminase	terminase small subunit; TerS	1
P096	A-1-L000013; A-Alj1000013; A-Hlh1000013; A-Lfl4000014; QLF85089.1; QVQ57021.1	Putative signal peptide	6	6	41	NA	NA	hypothetical protein
P097	A-1-L000021; A-Alj1000024; A-Hlh1000024; A-Lfl4000024; QLF85096.1; WAK45753.1; XAI95774.1	Putative signal peptide	7	7	44	NA	NA	hypothetical protein
P098	A-1-L000026; A-1-L000078	NA	2	1	77	NA	NA	hypothetical protein
P099	A-1-L000037; WAK45797.1	NA	2	2	64	NA	NA	hypothetical protein
P100	A-1-L000040; A-Alj1000066; QLF85131.1; WAK45795.1	NA	4	4	54	NA	NA	hypothetical protein
P101	A-1-L000048	NA	1	1	38	Tmhelix-containing protein	NA	transmembrane-domain-containing protein	5
P102	A-1-L000063	NA	1	1	39	NA	NA	hypothetical protein
P103	A-1-L000077	NA	1	1	54	NA	NA	hypothetical protein
P104	A-1-L000098; A-Alj1000102; A-Hlh1000101; A-Lfl4000104; AND75571.1; QVQ57109.1; XAI95747.1; YongM_e095; YongM2_e095	NA	9	9	55	Tmhelix-containing protein	NA	transmembrane-domain-containing protein	5
P105	A-Alj1000019	NA	1	1	46	NA	NA	hypothetical protein
P106	A-Alj1000020; A-Hlh1000020; A-Lfl4000020	NA	3	3	100	NA	NA	hypothetical protein
P107	A-Alj1000022; A-Hlh1000022; A-Lfl4000022; WAK45751.1	NA	4	4	52	regulator	regulator transcription factor	DNA binding protein	3
P108	A-Alj1000025; A-Hlh1000025; A-Lfl4000025	NA	3	3	86	regulator	regulator transcription factor	hypothetical protein
P109	A-Alj1000027; A-Hlh1000027; A-Lfl4000027	NA	3	3	108	NA	NA	hypothetical protein
P110	A-Alj1000036; A-Hlh1000069; A-Lfl4000037	NA	3	3	72	NA	NA	hypothetical protein
P111	A-Alj1000040; A-Hlh1000065; A-Lfl4000041; XAI95696.1	NA	4	4	72	NA	NA	hypothetical protein
P112	A-Alj1000041; A-Hlh1000064; A-Lfl4000042; QLF85112.1; WAK45771.1	NA	5	5	127	NA	NA	hypothetical protein
P113	A-Alj1000045; A-Hlh1000060; A-Lfl4000046	NA	3	3	55	NA	NA	hypothetical protein
P114	A-Alj1000048; A-Hlh1000057; A-Lfl4000049; A1_e112; Dfl-JY23_e112; Elbi_e112; YongM_e112; YongM2_e112	NA	8	8	63	Tmhelix-containing protein	NA	transmembrane-domain-containing protein	5
P115	A-Alj1000053; A-Hlh1000052; A-Lfl4000054; QVQ57060.1; WAK45782.1; XAI95705.1	NA	6	6	65	NA	NA	hypothetical protein
P116	A-Alj1000056; A-Hlh1000049; A-Lfl4000057; WAK45785.1	NA	4	4	56	NA	NA	hypothetical protein
P117	A-Alj1000057; A-Hlh1000048; A-Lfl4000058; QVQ57066.1; WAK45786.1	NA	5	5	112	NA	NA	hypothetical protein
P118	A-Alj1000059; A-Hlh1000047; A-Lfl4000060; QVQ57068.1	NA	4	4	67	regulator	regulator transcription factor	hypothetical protein
P119	A-Alj1000068; A-Hlh1000039; A-Lfl4000068; QVQ57075.1	NA	4	4	86	NA	NA	hypothetical protein
P120	A-Alj1000069; A-Hlh1000038; A-Lfl4000069; XAI95714.1	NA	4	4	49	NA	NA	hypothetical protein
P121	A-Alj1000079; A-Hlh1000078; A-Lfl4000081; QLF85052.1; WAK45702.1	potential Acr candidate	5	5	92	NA	NA	hypothetical protein
P122	A-Alj1000082; A-Hlh1000081; A-Lfl4000084; AND75551.1; QVQ57089.1	NA	5	5	36	NA	NA	hypothetical protein
P123	A-Alj1000084; A-Hlh1000083; A-Lfl4000086	NA	3	3	93	NA	NA	hypothetical protein
P124	A-Alj1000092; A-Hlh1000091; A-Lfl4000094; QLF85062.1; QVQ57100.1; XAI95738.1	NA	6	6	649	alkaline phosphatase	alkaline phosphatase PhoD	alkaline phosphatase D	2, 3
P125	A-Hlh1000016; A-Lfl4000016	sequence similarity to P066	2	2	387	expression	ribosome associated	DUF4379 domain-containing protein	3
P126	A-Hlh1000030; A-Lfl4000077	signal peptide	2	2	45	NA	NA	hypothetical protein
P127	A-Lfl4000029; A-Lfl4000079	NA	2	1	41	NA	NA	hypothetical protein
P128	AND75501.1; QLF85090.1; WAK45744.1	NA	3	3	85	NA	NA	hypothetical protein
P129	AND75504.1; QVQ57025.1	NA	2	2	97	NA	NA	hypothetical protein
P130	AND75507.1	NA	1	1	74	NA	NA	hypothetical protein
P131	AND75508.1; QVQ57030.1	NA	2	2	71	NA	NA	hypothetical protein
P132	AND75513.1	NA	1	1	78	NA	NA	hypothetical protein
P133	AND75522.1	NA	1	1	67	NA	NA	hypothetical protein
P134	AND75524.1; QVQ57071.1	NA	2	2	73	NA	NA	hypothetical protein
P135	AND75532.1; QVQ57058.1	NA	2	2	59	NA	NA	hypothetical protein
P136	AND75537.1; QVQ57051.1	NA	2	2	157	NA	NA	hypothetical protein
P137	AND75541.1; QVQ57044.1	NA	2	2	91	NA	NA	hypothetical protein
P138	AND75544.1	NA	1	1	68	regulator	regulator transcription factor	DNA binding protein	3
P139	AND75546.1	NA	1	1	128	NA	NA	hypothetical protein
P140	AND75553.1; QVQ57091.1	NA	2	2	79	NA	NA	hypothetical protein
P141	AND75554.1	NA	1	1	79	NA	NA	hypothetical protein
P142	AND75559.1; WAK45711.1; XAI95733.1	high structural similarity to cyanophage A-4 cement protein [AGR48552.1; 9JWB_Z]. They show low sequencial similarity to P143 and P144. According to (Hou, et al., 2025), the cement protein in A4 forms a trimeric surface structer. It is unknown if the three cement proteins form independent surface structures or that they form heterotrimeric structures. Putative signal peptide	3	3	204	phage body	cement protein	cement protein	3, 4
P143	AND75561.1; WAK45713.1; XAI95735.1	high structural similarity to cyanophage A-4 cement protein [AGR48552.1; 9JWB_Z]. They show low sequencial similarity to P142 and P144. According to (Hou, et al., 2025), the cement protein in A4 forms a trimeric surface structer. It is unknown if the three cement proteins form independent surface structures or that they form heterotrimeric structures. Putative signal peptide	3	3	192	phage body	cement protein	cement protein	3, 4
P144	AND75562.1; WAK45714.1; XAI95736.1	high structural similarity to cyanophage A-4 cement protein [AGR48552.1; 9JWB_Z]. They show low sequencial similarity to P142 and P143. According to (Hou, et al., 2025), the cement protein in A4 forms a trimeric surface structer. It is unknown if the three cement proteins form independent surface structures or that they form heterotrimeric structures.	3	3	191	phage body	cement protein	cement protein	3, 4
P145	XAI95689.1	NA	1	1	82	NA	NA	hypothetical protein
P146	XAI95692.1	NA	1	1	75	NA	NA	hypothetical protein
P147	XAI95699.1	NA	1	1	74	Tmhelix-containing protein	NA	transmembrane-domain-containing protein	5
P148	XAI95710.1	NA	1	1	85	NA	NA	hypothetical protein
P149	XAI95715.1	NA	1	1	511	NA	NA	hypothetical protein
P150	XAI95720.1	NA	1	1	141	NA	NA	WDGH domain-containing protein	2
P151	XAI95771.1	NA	1	1	84	NA	NA	hypothetical protein
P152	WAK45754.1; XAI95775.1	NA	2	2	145	NA	NA	hypothetical protein
P153	XAI95776.1	NA	1	1	74	NA	NA	hypothetical protein
P154	QVQ57022.1	NA	1	1	79	NA	NA	hypothetical protein
P155	QVQ57031.1	NA	1	1	82	NA	NA	hypothetical protein
P156	QVQ57035.1; QVQ57084.1	NA	2	1	43	NA	NA	hypothetical protein
P157	QVQ57042.1	NA	1	1	108	NA	NA	hypothetical protein
P158	QVQ57046.1	NA	1	1	78	NA	NA	hypothetical protein
P159	QVQ57047.1	NA	1	1	59	NA	NA	hypothetical protein
P160	QVQ57052.1	potential Acr candidate	1	1	84	NA	NA	hypothetical protein
P161	QVQ57053.1	NA	1	1	90	NA	NA	hypothetical protein
P162	QVQ57059.1	NA	1	1	69	NA	NA	hypothetical protein
P163	QVQ57061.1	NA	1	1	71	NA	NA	hypothetical protein
P164	QVQ57064.1	NA	1	1	38	NA	NA	hypothetical protein
P165	QVQ57072.1	NA	1	1	70	NA	NA	hypothetical protein
P166	QVQ57073.1	NA	1	1	61	NA	NA	hypothetical protein
P168	QVQ57090.1	NA	1	1	69	NA	NA	hypothetical protein
P169	QVQ57092.1	NA	1	1	57	NA	NA	hypothetical protein
P170	QLF85099.1; QLF85143.1	NA	2	1	64	NA	NA	hypothetical protein
P171	QLF85107.1; WAK45765.1	NA	2	2	75	NA	NA	hypothetical protein
P173	QLF85115.1	NA	1	1	52	NA	NA	hypothetical protein
P174	QLF85120.1	Putative signal peptide	1	1	38	NA	NA	hypothetical protein
P175	QLF85138.1	NA	1	1	54	NA	NA	hypothetical protein
P176	QLF85142.1	NA	1	1	49	NA	NA	hypothetical protein
P177	WAK45705.1	NA	1	1	78	NA	NA	hypothetical protein
P178	WAK45724.1	Putative signal peptide	1	1	44	NA	NA	hypothetical protein
P179	WAK45749.1	NA	1	1	43	NA	NA	hypothetical protein
P180	WAK45756.1	NA	1	1	69	regulator	regulator transcription factor	transcription factor	3
P181	WAK45768.1	NA	1	1	40	NA	NA	hypothetical protein
P182	WAK45775.1	NA	1	1	61	NA	NA	hypothetical protein
P183	WAK45791.1	NA	1	1	71	NA	NA	hypothetical protein
P184	WAK45807.1	Putative signal peptide	1	1	38	NA	NA	hypothetical protein
P070e	A1_070e	associated with cluster P070	1	1	347	NA	NA	hypothetical protein

## Sheet: Table S7
Supplementary Table S7. Information of all functional ORFs of in cyanophages
ID	start	end	strand	product	translation	nuc	sequence_nt	Cluster	nt_length	Predictions	norm_strand	norm_start	norm_end
A-1-L000001	1	1605	1	hypothetical protein	MLYTDSLNYKQLSTVSDDMQSYLPVAKEIAKIAQGGHELDPEDYLLIRDEESPGVTKKRIEKFAPENYLGAAIRLQRVLQKSGVLEIKSDSLPGDLTVWESFFNKVDKRNSSLKDFVIDVFTEALVNKYCYVQVELSKLDFDTVTEAEAEGILSTRKPYYFKIPLQSIMVEKCDGDTIQWIKYKRLDKIDNPFDKTIYNMSYVLIDDQHITTWTYYDIIVSDSGGISKIWDQSLNYGKGAYRSIDKEKDKADPVSFAHNRGSCPVVRYRMDESLYMADQVYLAQRMIYGLSMNLFHTAANAGFVQKWIRPYIAGNDTRISKESGGASYIPLPKEALNEIIKKYAESLGDESVIMADFFTFEELAGTSVEMQIGLIERLRNYIFTAILFNNAKFEQSTSD…	A-1(L)	ATGTTATATACAGATTCTTTAAATTACAAACAGCTTTCGACAGTTTCGGACGATATGCAAAGCTACTTACCAGTAGCTAAAGAGATTGCGAAAATTGCTCAGGGTGGACACGAGTTAGATCCTGAAGATTATTTATTAATACGTGATGAAGAATCCCCCGGAGTCACTAAAAAGCGTATAGAAAAATTTGCGCCTGAAAATTACTTAGGTGCTGCAATTCGACTGCAAAGAGTTTTACAAAAATCTGGAGTATTGGAAATCAAATCTGACTCCCTTCCTGGTGATTTAACAGTTTGGGAAAGCTTTTTTAATAAAGTTGATAAGCGTAATTCATCGTTAAAAGATTTTGTTATCGATGTATTTACCGAAGCGTTGGTCAACAAATATTGTTATGTTCAG…	P002	1605	NA	1	2238	3842
A-1-L000002	1759	2490	1	outer membrane protein	LPELITGGNAMSDNKEGLTDDQSNDQQDAPENSGSDIDAKLEAKFKAFEDKINQALNGVVKKVEKRFSTEKPPESKKGTDSSESDSKKPELDTIQALKAEMEKSRKELEEQLEAERQERAKDKRQVFLSSVESKISTAIAGQKFDDPEAALTVFKSMYGLDNWHPGTSGYVIYKTSEEDEGKTLESLVKDWAKSPVGKRFFNKNLPNGTGLDTPDNARQTSDKAKTLFEKRKQAKESGFKIKM	A-1(L)	TTGCCGGAACTTATAACCGGGGGAAATGCTATGAGCGATAACAAAGAAGGTTTAACAGATGATCAATCCAATGATCAACAGGATGCACCAGAGAATTCTGGTAGTGACATTGACGCTAAATTAGAAGCTAAATTTAAAGCTTTTGAAGATAAAATAAATCAAGCGCTTAATGGTGTGGTCAAGAAAGTTGAAAAACGATTTTCAACCGAAAAACCCCCGGAGTCAAAAAAAGGAACTGACAGTTCTGAGAGTGACTCTAAAAAACCCGAATTAGACACCATACAAGCTTTAAAAGCTGAGATGGAGAAAAGTCGGAAAGAGTTAGAAGAACAATTAGAAGCTGAAAGACAAGAAAGAGCAAAAGACAAGCGCCAAGTATTTTTGTCAAGCGTTGAAAGT…	P003	732	NA	1	3996	4727
A-1-L000003	2496	3593	1	Chain A, Putative major capsid protein	MPLTNLTPTELLANKAVDYLANSFLVETPMLGLLANRVINQKQKAIEWGAKVAQGVVGGRTRTGALANDTQGTIKGASLSVPDYYIKHQFDVGKDEIVNSDATGKISAVRDPVGTAIADAFDVLSKKINSVLYTASGVADATNYGIFGLDAAAGTTVANSATGTYAGISKVTFPRWRSIIQGGAVPGTNEALTIARMTAMLRARRTAGVTYKGNQNQRLVILTSDNIENDVLRPLYGTVVDNQNVDFTRLDKDLLPYVNYMVKGIPVVSDIDCPANKMYLLNLDKLAIYSFDQSDADQSNGKITYIPLRYVDETGDTPSESTLWVRLADVSDEHPDLLKFELSVALQLVAFDLIDSISVIRDITQ	A-1(L)	ATGCCTTTAACTAATCTAACCCCGACCGAATTATTAGCAAATAAAGCCGTTGATTATTTGGCTAATAGTTTCTTGGTTGAAACTCCTATGTTAGGATTACTAGCAAATCGAGTTATTAATCAGAAACAAAAAGCTATTGAATGGGGTGCTAAAGTCGCCCAAGGTGTTGTGGGTGGAAGAACTCGCACTGGCGCATTAGCTAACGATACACAAGGAACCATTAAAGGTGCTTCTTTATCCGTACCAGATTACTACATCAAACACCAATTTGATGTGGGTAAAGACGAGATCGTTAATTCTGATGCCACAGGTAAAATATCCGCCGTTCGTGACCCTGTAGGAACTGCGATCGCCGATGCTTTTGATGTTTTATCTAAAAAGATTAACAGCGTTTTGTAT…	P004	1098	NA	1	4733	5830
A-1-L000004	3732	4220	1	hypothetical protein	VTPGAILVTHPLESYYNQFLDGLPTSELEELEIEFVAMCIGFPRSQNNFVNALLDLSTIEVYTIRTSVKEILRLDKLNKESIENRQVTKVEDITMNMNYIGDIKDELVTEVKKLARILKLPVLDNLYVSYDDVEGRIGANGLLEPLNRGSGFGSYLTGYTVR	A-1(L)	GTGACTCCGGGGGCAATACTTGTGACACATCCGTTAGAAAGCTATTACAACCAATTTTTAGATGGTTTGCCAACTTCCGAATTGGAAGAATTAGAAATAGAATTCGTTGCAATGTGTATCGGTTTCCCCCGGAGTCAAAACAACTTTGTAAACGCTTTGTTAGACTTATCAACAATAGAAGTTTACACAATCCGAACATCTGTTAAAGAAATATTAAGACTTGACAAACTCAATAAAGAATCTATTGAAAATCGTCAAGTAACTAAAGTTGAAGATATCACAATGAACATGAATTATATCGGTGATATCAAAGATGAGTTAGTGACAGAAGTTAAAAAGCTGGCAAGAATTTTAAAATTGCCCGTACTAGATAATCTTTATGTCAGCTATGACGATGTG…	P005	489	NA	1	5969	6457
A-1-L000005	4217	4543	1	hypothetical protein	MIIKQGFLFNDFDTRQVLQSAVDDTTAISVDIVGSRTPVRTGNLLSRWDSEDVFDFADSITSNVFNDTHYAEYVELGTSRFSGRFYLLRSLPEIEESFIETVIDKLGE	A-1(L)	ATGATAATCAAACAGGGTTTTCTATTTAACGATTTTGATACGCGTCAAGTGTTGCAAAGCGCTGTCGATGATACAACAGCAATTAGTGTTGATATTGTCGGATCACGTACTCCTGTTAGAACTGGCAACCTGTTGAGTCGTTGGGACAGTGAAGACGTTTTTGATTTTGCCGATTCGATAACATCCAATGTTTTTAATGATACACATTACGCTGAATATGTAGAATTAGGCACGTCTCGTTTTAGTGGTAGGTTTTATCTTTTGCGATCGCTACCAGAAATTGAAGAAAGTTTTATAGAAACTGTCATTGATAAATTAGGTGAATAA	P006	327	NA	1	6454	6780
A-1-L000006	4543	4941	1	hypothetical protein	MLYSNLINVKQKVISIREKLGDPRLKSLVFEYPAGQLFRVTPKLKVSMVPKNMIGLPLDSKSNITISADDYYITDVSRNVPEAAFRTRAWLDPVINDSGVIVSGINCRCHVINDKSGLSYDLILRKEREVRV	A-1(L)	ATGCTTTACTCTAATCTGATAAATGTTAAACAAAAAGTAATATCTATTAGAGAAAAGCTAGGTGATCCACGTTTAAAATCACTTGTTTTTGAGTACCCTGCTGGGCAACTTTTTAGAGTCACTCCAAAATTAAAAGTGTCAATGGTTCCCAAAAACATGATAGGTTTGCCGTTAGACAGCAAATCAAATATAACGATAAGCGCCGATGATTACTATATAACTGATGTTAGTCGTAACGTGCCTGAAGCGGCGTTTAGAACACGCGCATGGCTTGACCCTGTGATCAATGACTCCGGGGTGATAGTGTCTGGTATTAACTGCCGTTGCCATGTCATCAATGATAAATCCGGATTAAGTTATGATTTGATATTGAGAAAAGAGAGGGAAGTTAGAGTATGA	P007	399	NA	1	6780	7178
A-1-L000007	4938	5660	1	hypothetical protein	MTKPSLISAKILQHINSIVWLQSKGIQEPLKPDVIVNNVAYPPNVIAEKPVTNIEVITNSSMIENTGGVRQFLCKAVFEYTIVWVFSREVYKTYHQIPRSQIQDLLVFCQQFVISAYQGIDPDITNIDLKPSQVLVKPTEDVNSDVSNSSSWSVVADLRFMIEFLTSLDEFLPIDFNKIQPPTWELLDDLDPIVPEQPFTLNGLIISLNKSELPKVRADESDTYQLEEILYIPPTIEDQI	A-1(L)	ATGACAAAACCCTCTTTAATCTCTGCAAAGATTTTACAGCACATAAACAGTATTGTATGGTTGCAATCGAAAGGTATACAGGAACCTTTAAAACCTGACGTAATTGTGAATAATGTTGCTTATCCTCCTAACGTTATCGCTGAAAAACCTGTGACAAATATTGAAGTGATAACAAACTCTTCAATGATTGAAAATACAGGAGGGGTAAGACAATTTTTGTGTAAAGCTGTTTTTGAATATACAATAGTATGGGTTTTCAGTCGGGAAGTTTACAAAACTTATCATCAGATCCCCCGGAGTCAAATACAAGACTTGTTAGTTTTTTGTCAACAGTTTGTTATATCTGCATATCAAGGAATTGACCCGGACATAACAAACATTGATTTAAAACCATCGCAA…	P008	723	NA	1	7175	7897
A-1-L000008	5692	7212	1	tail sheath protein	MTNFLNGVNIGTPGAYAFYQTTQSRPINVEPFRTCYMVGFASNGVNKNVPTRISNLTDFTNVYGTSASTNSVDLFFKNSQGFGNLYFVNVAIPTRYQIVVTAATAGSYSVTVNGVTKAITVVGGATTTTIAADVISAINNDTVLNKEVLATVGGTSSTVVITSKKPTNTTTAAVTGVIFTLTTTTGTSPSVADYVYTINNTFDPALEAGFVIAPEAFSTFTKSDRLSIQVALENLCSAYRYQWAALIDSGAMSEISNTDRAIAEAATYNSVQGHCSYYYPYLINLDDQQVPPSAAVAGMALYRFVIDGFAEPPAGVNFPLKGVKNVAYKVTWEEQNVANPEGVNCILNKENYGIVVWGARTLSADPNIVFISTRIILNIVINTLNRGYDFDIFNSVGGT…	A-1(L)	ATGACTAATTTTCTAAATGGTGTTAATATTGGAACCCCCGGTGCTTATGCGTTTTATCAAACTACGCAAAGTAGACCGATCAATGTTGAACCTTTCCGTACTTGTTACATGGTAGGTTTTGCGTCTAACGGTGTTAACAAAAATGTGCCAACACGGATCAGCAACTTAACAGATTTCACAAATGTTTATGGCACTTCTGCCAGTACAAACAGCGTTGATTTATTTTTCAAAAACTCTCAAGGTTTTGGAAATCTTTATTTTGTTAACGTCGCAATTCCTACACGTTATCAAATTGTTGTAACTGCTGCTACGGCTGGAAGTTACTCGGTAACAGTTAACGGTGTTACAAAAGCTATAACCGTTGTAGGTGGCGCTACGACTACGACAATAGCAGCCGAT…	P009	1521	NA	1	7929	9449
A-1-L000009	7269	7772	1	tail tube protein	MAVSKRPFSINSFAVNLNIGNFVDARYWSKCSKIEKTYNTGEYSDGQSNIIYTLPGAIKYPEVVLSKAFSPGDEELINRLIAVNSDPIAWVTVFIQPMYRDGYYNVPQGGKIILEFCTVARATPINEIDTIGSNAAMFECALNPSRIRSDGGNINWWSEPAAQVAEF	A-1(L)	ATGGCAGTTTCTAAAAGACCGTTTAGTATTAATAGTTTTGCAGTAAATTTAAATATTGGAAATTTTGTTGACGCTAGATATTGGTCAAAATGTAGCAAAATTGAAAAGACTTACAACACCGGCGAATATAGCGATGGACAAAGCAATATTATTTACACGCTTCCTGGTGCTATAAAATATCCTGAAGTAGTGCTTAGTAAAGCTTTTTCACCCGGAGATGAAGAACTAATCAACAGATTGATAGCCGTCAATAGTGACCCTATCGCATGGGTGACAGTGTTTATACAACCGATGTACAGGGACGGATATTATAATGTACCGCAAGGTGGTAAAATTATATTAGAGTTTTGTACAGTGGCTAGAGCTACTCCAATAAACGAAATTGACACCATAGGTTCA…	P010	504	NA	1	9506	10009
A-1-L000010	7784	8224	1	hypothetical protein	MKIQPVNEPVNFKMPDDVPEEAIQEQKSVAKDKSDVSESTGVIVEEVVTPSGKDAIAFESPVTGVRVVVLVPDTLEILAIEREIVKKHRESGAFEQSIVFLSHLIVEYGDKKGHRIFTFENLLKLSRRELTAINMIATEFFRLGEI	A-1(L)	ATGAAAATACAACCAGTTAATGAACCCGTAAATTTTAAAATGCCCGATGATGTTCCTGAAGAAGCTATACAGGAACAAAAATCAGTCGCAAAAGATAAAAGCGATGTGTCAGAATCTACAGGTGTAATAGTTGAAGAAGTTGTTACACCAAGCGGTAAAGATGCAATCGCTTTTGAATCTCCTGTAACCGGTGTAAGAGTAGTTGTACTTGTACCAGATACCCTAGAAATATTAGCAATTGAAAGAGAAATTGTTAAAAAACATCGTGAATCCGGAGCATTTGAACAATCTATTGTATTCTTATCACATTTGATAGTTGAATACGGCGATAAAAAAGGTCATAGGATTTTCACTTTTGAAAATTTGCTCAAACTTAGCCGCAGGGAGTTAACGGCCATT…	P011	441	NA	1	10021	10461
A-1-L000011	8214	8426	1	hypothetical protein	VKFDFDENILYYAGNEFDEKQIKKAILSACGGKITETYFKMLEMPIIKLFDLLHIYVEYQQEQEKLIKSK	A-1(L)	GTGAAATTTGATTTTGATGAAAATATTCTCTATTACGCTGGTAACGAATTTGACGAAAAACAAATCAAAAAAGCAATTTTAAGCGCTTGTGGCGGTAAAATCACGGAAACATATTTTAAAATGCTGGAAATGCCTATAATAAAGCTTTTTGATTTGTTGCACATTTACGTCGAATACCAGCAAGAACAAGAAAAACTTATCAAATCAAAATAG	P011	213	NA	1	10451	10663
A-1-L000012	8496	10565	1	tail protein	MANRQHVISVDLRLLTGNFDSSLNYIQGRLNGVFGVVSDNATNSFFGNGGFLSSYLWNQAFNAIQMAGIAAFRAIGNEVKRAISYQDNLISMATSYKGLLNLTTKEAFGLARESNIIFQQRNVGLPTFGNFGTQLRAQYGDDFLSAFYDQNNMKGSLERTADMIGRTTVLLGSISGVTNYQRTSFLSNFLSDDFKKLQRLEVFRNSPQLQRAFNSQVDSIGGEQGFNALTRKDRLLLLENIAAIAVDDDIIKAYKDSLGGVLSRLGQELFGDIGIFSFTRDLIFGLPNTSILNSITFFMKEVFAPDGVFGLIKPALQGIVDTVLIGTKFILDRTSFIFMGLNALARVLQPIAPLIYATSSALTVLAAVGLANTIKSAVQGYLISSGAAMLGGRMGMAAM…	A-1(L)	ATGGCAAATAGACAGCACGTAATATCAGTAGATTTGAGACTGCTTACAGGTAACTTTGACTCATCTTTAAATTACATTCAAGGACGTTTAAACGGTGTTTTTGGTGTAGTTTCAGATAACGCTACAAACAGCTTTTTTGGTAATGGCGGTTTCTTATCTTCTTATCTGTGGAATCAAGCATTTAACGCCATACAAATGGCAGGTATAGCAGCTTTCCGCGCAATAGGTAATGAAGTGAAACGAGCCATATCTTATCAAGACAACTTGATAAGTATGGCCACCAGTTACAAAGGATTATTAAATTTAACAACCAAGGAAGCGTTTGGACTGGCTAGAGAATCTAATATCATTTTTCAACAACGTAACGTGGGTTTACCCACTTTCGGTAATTTTGGTACA…	P013	2070	NA	1	10733	12802
A-1-L000013	10558	10686	1	hypothetical protein	MRKTDVIGWTIITILSIYFLMVSWYEYENSNDSGGDQYERIK	A-1(L)	ATGCGTAAAACGGATGTAATAGGATGGACAATAATTACAATATTGTCTATTTACTTTTTAATGGTTTCATGGTATGAATATGAGAATTCTAATGACTCCGGGGGTGATCAGTATGAACGTATAAAATAA	P096	129	Signal peptide	1	12795	12923
A-1-L000014	11158	11505	1	hypothetical protein	MYLTAPATTRIAQSRQIRSFMSGEYSEYYQAWIDSLELQLDQMDAKIQKEMEDADPETPVTYSTVRNRETGEEVTIHITKKNTLYIHFDIDANQTTTKHPVTTMEKAREYAKTLL	A-1(L)	ATGTACTTGACAGCACCAGCAACCACCCGGATCGCTCAATCTCGTCAGATTCGCTCTTTTATGAGTGGTGAGTACAGCGAATACTACCAAGCGTGGATCGATTCGTTAGAACTCCAATTAGATCAAATGGATGCTAAAATCCAAAAAGAGATGGAAGACGCTGATCCCGAAACACCAGTTACTTACAGCACCGTAAGAAACCGTGAAACAGGTGAAGAGGTTACAATCCACATCACCAAGAAAAACACACTTTACATCCACTTTGACATCGACGCAAACCAAACCACAACAAAACACCCAGTAACCACGATGGAAAAAGCTAGAGAATACGCCAAAACCCTTTTATAG	P014	348	NA	1	13395	13742
A-1-L000015	11591	14290	-1	valine-glycine repeat protein G1	MQDPIIKILIGNDTFLLGQEIIDLDFQIGEGKKQNNINFTIFDKDGFFADKYISTSYAQGGIDLPIDFLENPDDAKDTNSASTATEVDSVGNGTVSRSGVFTPKIRAFLDTIASKETAPGTALNIEGYRSVSGSSTLFDESEMVAGGFPRSQGSKNIGRYQFTVIDYNHARSKYPNINNYSPQNQDLLAYFKLQHRNVLPYLLRDDLDNAIDKASYEWASFPGIGKPQGQFNQVQSGTTIASLKSYYETRLAYYRSLEAGSDFQASAPKDTTNNQYAGKEYKTIRTLSNSTTASFYGYNDGFDSSDLTANGERFNPEGITAAHESLPFGTLVKVTWAVNNKSVVVRINDRGAFVRLGRQIDLSYGAAKALSSPGNDAIAAGLLTVKLEVVELRTPIGEN…	A-1(L)	ATGCAAGATCCAATAATTAAAATATTGATAGGTAACGATACATTTTTGTTAGGTCAGGAAATCATCGATCTCGACTTTCAAATAGGAGAGGGCAAAAAACAGAATAATATTAACTTCACAATATTTGACAAAGACGGTTTTTTTGCAGATAAGTACATTAGTACCAGCTATGCCCAAGGTGGGATCGATCTGCCGATTGACTTCCTTGAAAATCCCGATGACGCTAAAGACACTAACAGCGCTTCTACAGCAACCGAAGTTGACTCCGTGGGAAATGGCACGGTAAGCCGTTCCGGGGTCTTCACGCCTAAAATCCGAGCATTTCTAGACACGATCGCAAGTAAAGAGACAGCACCGGGAACCGCTTTAAACATTGAAGGGTATAGAAGTGTGTCCGGT…	P015	2700	NA	-1	13828	16527
A-1-L000016	14314	14781	-1	hypothetical protein	MTTQEFLSKNKTIESELLDLLIKPNTDDSILTRNKQAIADRDLFDIEWEPGQSLNKLATEYLGDSFAWQIIADANGIDPTKEIDIGAGLKVPDQKALENSIKKFIVNSPTGKQLISDAKQSILNLIGVGDSNTEFSKTLKDCIGKVVNFSFDNTQ	A-1(L)	ATGACTACCCAAGAATTTCTAAGTAAAAATAAAACTATCGAATCTGAATTACTTGATTTACTTATCAAGCCAAATACAGATGATAGCATATTGACAAGAAATAAGCAAGCGATAGCGGATCGTGATTTGTTTGATATTGAATGGGAACCGGGGCAAAGTTTGAATAAGTTGGCAACTGAATATTTGGGTGATAGTTTTGCTTGGCAAATTATAGCAGATGCAAATGGGATTGACCCGACCAAAGAAATTGATATAGGTGCAGGATTGAAAGTGCCAGACCAAAAAGCACTGGAAAATTCTATCAAAAAATTTATAGTGAATTCTCCCACCGGAAAGCAACTGATCAGCGACGCAAAACAATCAATTTTGAATTTAATCGGTGTGGGTGACAGTAACACT…	P016	468	NA	-1	16551	17018
A-1-L000017	14780	15061	1	hypothetical protein	MEKSELLEKVYSGHETVKQLITENDYKFTWVGREFYIEVEGFDRMYWKLELYDPETDQYYATKRSDNPSMFMTSWIDAKILRKLVIHEKAFIV	A-1(L)	ATGGAAAAATCAGAATTATTGGAAAAAGTTTATAGTGGTCATGAAACTGTAAAACAACTGATAACAGAAAACGACTATAAGTTTACGTGGGTCGGTCGTGAATTCTATATAGAAGTTGAGGGATTTGATAGAATGTACTGGAAATTAGAACTTTACGATCCTGAAACAGATCAGTATTATGCAACTAAACGAAGTGATAATCCTTCAATGTTTATGACATCATGGATCGACGCTAAAATATTAAGAAAATTGGTGATTCACGAAAAAGCTTTTATTGTCTAG	P017	282	NA	1	17017	17298
A-1-L000018	15051	15899	-1	hypothetical protein	MSKFLKNRAVVNGLPVIKNPGKYQHCYLIEYEDSTNVKQTPTENKNKQQQGFPVYLFMMNPENITYNLPINYQEIAIPFTAKNQLNYSNGGNIVMTMSNLILDTMDEKRSLQPLIDRLIALREPTVKKGLKSHPKILAFKWGSNTFAPCVLTNISFDVTRWIDGYPTKARVNMSLKEIQKPSSDSKALEEAKKKVKVETVQNGNLKKTLSEKQLIDGVKRVTEYLKKNISFQPRTIQNILSDPKSVIKIDKDTGQVSLFNGNGEFAALVGTYNGDIFSPSRQ	A-1(L)	ATGTCCAAATTTTTAAAAAACCGTGCGGTTGTCAACGGATTGCCAGTAATTAAAAATCCTGGTAAATACCAACATTGCTATCTGATAGAATACGAAGACTCTACGAACGTAAAACAAACCCCCACGGAAAACAAAAATAAGCAGCAACAAGGTTTTCCCGTGTATTTGTTTATGATGAATCCTGAAAATATCACTTACAATCTTCCCATCAATTATCAAGAAATTGCTATTCCTTTTACCGCCAAAAATCAATTAAATTATAGCAACGGCGGTAACATCGTTATGACTATGAGCAATTTGATACTTGATACTATGGATGAAAAGCGATCGTTACAACCGTTAATTGATCGTTTAATTGCTTTGCGGGAACCGACAGTTAAAAAGGGTTTAAAATCTCAT…	P018	849	NA	-1	17288	18136
A-1-L000019	16266	16463	1	hypothetical protein	MKHAQVIIILIVALIVVATTIYNGFAPYIKQAIAYGKERYYYRKLAAKNSKEFWNAMTRKNFMGA	A-1(L)	ATGAAACACGCTCAAGTAATTATCATTCTAATTGTCGCTTTAATCGTCGTTGCAACCACTATTTACAACGGTTTTGCACCTTACATCAAGCAAGCGATCGCATACGGTAAAGAGCGATATTATTACCGCAAATTAGCTGCAAAAAACAGTAAAGAGTTTTGGAACGCTATGACACGTAAAAATTTCATGGGAGCTTAA	P019	198	1 TMP; Signal peptide	1	18503	18700
A-1-L000020	16466	16645	1	hypothetical protein	MKPTPRNIQRVRKALLEHQFQLAKTVEGYAATFNDHVIFDGVNLQEISDKLNLYNMGQL	A-1(L)	ATGAAACCGACACCACGCAACATTCAACGTGTACGTAAAGCGTTGTTAGAGCATCAGTTTCAGCTAGCAAAAACGGTAGAAGGTTACGCCGCAACTTTTAATGATCATGTTATTTTTGACGGAGTAAATCTGCAAGAAATTTCAGACAAGCTTAATCTATACAACATGGGTCAATTATGA	P020	180	NA	1	18703	18882
A-1-L000021	16642	16776	1	hypothetical protein	MINRYTLTFFFVACFLIGLLSGRVTNEAPKVWSDFDHRLQQENE	A-1(L)	ATGATCAACCGTTACACACTTACATTCTTTTTTGTCGCTTGTTTTTTGATCGGTTTACTGTCCGGTAGAGTAACTAACGAAGCGCCTAAAGTTTGGTCAGACTTTGACCACCGACTACAGCAGGAAAACGAATAG	P097	135	Signal peptide	1	18879	19013
A-1-L000022	16875	17015	1	hypothetical protein	MTKKITFVYKKMRLSKMDQEQQEVIDMLKKQQECCNFENRVYMIEK	A-1(L)	ATGACTAAAAAAATAACTTTTGTGTACAAAAAAATGAGACTTTCAAAAATGGATCAAGAGCAACAAGAGGTTATAGATATGTTGAAAAAACAACAAGAATGTTGCAACTTTGAAAATCGTGTTTATATGATAGAAAAATAA	P021	141	NA	1	19112	19252
A-1-L000023	17148	18038	-1	exonuclease RNAse T and DNA polymerase	MITNIGKYNEAIATLTDLSISGQCVFLDTETIGDFSTPVLVQLAVVDVEKRPVFDSYIHPWYTPDTIKLNNGCDWTEIEKAYDFESHYEVIKSALADRDILIYNKSFDIRVIKEVCEFYELPLPFDPDRVYCLMSLRSAIVGDKLPLEGKHTALEDCIVMVDLFRELCKYEPIDAIAGDNLAEICIKYDQVCAEIKQLESLKSEYAAFIKSKILSDVTPGDSTTIEIKHGKKQIKVSGRVDTIAKVDDPSLVPEKYFKQQFDRFAAAKDFKESGELAPGVTYERSEILGKIVIADK	A-1(L)	ATGATAACCAACATTGGAAAGTACAACGAAGCGATCGCAACACTGACAGATTTGTCTATTTCCGGGCAATGTGTTTTTTTGGACACAGAAACTATTGGGGATTTTTCTACACCTGTGTTAGTGCAACTGGCCGTTGTAGACGTTGAAAAACGTCCGGTGTTTGACAGTTACATTCATCCGTGGTATACACCGGACACGATCAAGTTAAATAATGGTTGTGACTGGACAGAGATTGAAAAAGCTTACGATTTTGAAAGTCACTACGAAGTGATTAAAAGCGCTTTAGCAGATCGTGACATATTGATATACAATAAATCTTTTGACATCCGAGTGATCAAGGAAGTATGCGAATTTTACGAATTACCGCTACCATTTGACCCTGACCGGGTTTATTGTCTT…	P022	891	NA	-1	19385	20275
A-1-L000024	18112	18549	-1	hypothetical protein	MNHSIDYFKEGSGIVTLCGSTKFFHEFTEANRILTFNNWVVLSCGSWGHSYHKYSIELDKDYTTIKKLHLKKIMMSNCIVVVSDKTFYIGDSTKLEIAFANDHGLPIFYYDGENFTGTSNKKPPNVLDKIEDKIDYWIEKRKAIL	A-1(L)	ATGAACCACTCGATTGATTACTTTAAAGAAGGTTCCGGTATTGTTACGCTTTGCGGTTCCACTAAATTTTTCCATGAATTCACAGAAGCTAATAGGATATTGACTTTTAATAACTGGGTAGTATTATCTTGCGGTTCATGGGGTCATAGTTATCACAAATATTCCATAGAGTTAGACAAAGACTATACAACTATCAAAAAATTACATTTGAAAAAAATTATGATGAGTAATTGTATAGTGGTTGTTTCTGATAAAACTTTTTATATAGGTGATTCTACAAAGTTAGAAATAGCTTTTGCAAATGATCACGGTTTACCAATCTTTTACTATGATGGTGAAAATTTCACAGGAACTTCAAACAAAAAACCCCCAAACGTTTTAGATAAAATTGAAGATAAG…	P023	438	NA	-1	20349	20786
A-1-L000025	18676	19080	1	NarL/FixJ family transcription factor	MNELPPKIDLKHCLSDLEIEVLNEICKGLRKREIAEKLHKSVGAINHVTQVLYSKLNCKNYIDLFKVSHGFLPVPEKIIESNNKGVEKIIELFENGLKPRQIAERTGRTVNHIYAVTGAYKAIKKAERNKTYDE	A-1(L)	ATGAACGAATTACCACCGAAAATCGATTTAAAGCATTGTTTAAGCGATTTGGAGATAGAAGTACTAAACGAGATTTGTAAAGGTTTACGCAAGCGGGAAATAGCGGAAAAGTTGCATAAATCCGTAGGTGCAATAAACCATGTGACACAAGTTTTATATTCTAAACTTAATTGCAAAAATTACATAGATTTGTTTAAAGTGTCGCATGGATTTTTACCCGTTCCTGAGAAAATTATAGAGTCTAACAATAAAGGTGTTGAAAAAATCATAGAACTGTTTGAAAACGGTCTGAAACCGCGACAAATAGCAGAAAGAACCGGTCGCACTGTAAACCATATTTACGCCGTTACTGGTGCGTACAAAGCCATAAAGAAGGCTGAAAGAAATAAAACATACGAT…	P024	405	NA	1	20913	21317
A-1-L000026	19406	19639	-1	hypothetical protein	VYGENYKNYQFFKCLKLLLHSFSTLSTLQNFYRYKVTKKCNACNAVTVRFTAIALQNYVVTSFKIHRNENSFLYLVY	A-1(L)	GTGTACGGAGAAAACTACAAAAATTACCAATTTTTTAAGTGCTTAAAGTTACTGTTACATTCTTTCAGTACACTTTCCACGTTACAAAATTTTTACCGTTACAAAGTTACGAAAAAATGTAACGCGTGTAACGCAGTCACAGTAAGGTTTACAGCGATCGCGTTACAAAATTACGTTGTTACGTCGTTCAAAATTCATAGAAACGAAAATTCATTTTTGTACTTAGTGTACTGA	P098	234	NA	-1	21643	21876
A-1-L000027	20109	20921	1	valine-glycine repeat protein G1	MIVDEFSSVYECLLYCYKMVKRSEQLNGRRVFPILSVVTNNNDPEGRRRVKIADPLFGNLIESNWIRPIRVSQNQDNPLPQINQMVIVWFVDGDSEKGYYLPIINDANPSREKDDPVNDSAVRIEGNNTIRIDKNDSETVGGNQTVAIAGEQNINVDGNLIENIGGDIDQNVTGKIEVRSESTILIDADGTIIIKNDSGAFISLGGNGEVLIQDSQGRKIRLGGAFNSTWDLNGLPMAFINATSVTIAGKQIATVGAVDTRGDTIVNKGW	A-1(L)	ATGATAGTTGATGAATTTTCCAGTGTTTACGAATGCTTATTGTATTGTTACAAAATGGTAAAGCGTTCAGAGCAACTGAACGGCCGTCGAGTGTTTCCTATTTTGTCAGTGGTTACAAATAACAACGATCCAGAAGGAAGAAGGAGAGTTAAAATCGCTGACCCTCTTTTCGGTAATTTGATCGAATCGAACTGGATAAGACCGATTAGAGTAAGCCAAAATCAAGATAATCCTTTGCCACAAATTAATCAAATGGTTATCGTTTGGTTTGTCGATGGGGACAGTGAAAAAGGTTATTATTTACCGATTATTAACGATGCCAATCCTTCACGGGAAAAAGATGATCCGGTCAATGATAGCGCTGTCAGAATTGAAGGTAATAACACCATTCGCATTGAT…	P025	813	NA	1	22346	23158
A-1-L000028	20977	21084	-1	hypothetical protein	MMHWEEKPKEEKPKRYKKEWQLGDDGMMYEVDVEY	A-1(L)	ATGATGCACTGGGAAGAAAAACCAAAAGAGGAAAAACCAAAACGATACAAAAAGGAATGGCAATTAGGCGACGATGGGATGATGTATGAAGTTGATGTAGAATATTAA	P026	108	NA	-1	23214	23321
A-1-L000029	21096	21470	-1	hypothetical protein	MVKNGFQALWEMFSGGDDDSDSYYDPANYPNSQMPGETSAEFQARMTEKAENDAHSRKRTNAQLNDPQHGLTQANLEQAKREGLISEEQYKKGLSDLRKKKWEETGIDKVLEEKSKKKVKENIN	A-1(L)	ATGGTTAAAAACGGATTTCAAGCGCTTTGGGAAATGTTCAGTGGTGGTGACGATGATTCTGATTCATATTATGATCCCGCCAACTATCCAAACTCGCAAATGCCTGGAGAAACTTCAGCAGAATTTCAAGCAAGGATGACAGAAAAAGCTGAAAATGATGCTCACAGTCGTAAACGCACTAACGCGCAGTTAAACGATCCCCAACATGGACTAACACAAGCTAATCTAGAACAAGCGAAACGGGAAGGGTTAATTAGTGAAGAACAATACAAAAAAGGATTGTCAGATTTGAGAAAGAAAAAATGGGAAGAAACAGGGATTGACAAAGTTTTGGAAGAAAAATCCAAAAAAAAGGTGAAGGAGAATATAAATTAG	P026	375	NA	-1	23333	23707
A-1-L000030	21537	21755	-1	hypothetical protein	MIDNFYNLFHRTRGITDPLLSGTFDIWKSDKTVFYSGIYSKSKDEYYVMVWIEEDKKVVYRCKQYFYTLKSF	A-1(L)	ATGATAGATAATTTTTATAATCTTTTTCATAGAACTAGAGGTATAACTGATCCGCTATTATCAGGCACTTTTGATATTTGGAAAAGCGATAAAACAGTTTTTTATTCTGGCATTTATTCAAAATCTAAAGATGAGTATTATGTGATGGTTTGGATAGAAGAAGATAAAAAAGTGGTTTATAGATGTAAACAATATTTTTATACACTAAAAAGTTTTTGA	P028	219	NA	-1	23774	23992
A-1-L000031	21903	22232	-1	hypothetical protein	MFSLTINIYNGDQASAIAEINTKLDGVVNKMSELSDKISTLEQLSQAEIAEFQLVVTKITDLRSTVEAQTAEIARLNELLAAGGVVTAEDLARLDQLIANVSGIVNPEV	A-1(L)	ATGTTTTCACTCACCATTAATATTTACAATGGTGATCAAGCTTCTGCGATCGCAGAGATTAACACCAAACTAGACGGAGTAGTAAATAAAATGTCTGAATTATCTGATAAAATTTCAACGCTAGAACAACTTTCTCAAGCTGAAATTGCTGAATTTCAATTAGTAGTTACTAAAATTACTGATCTTCGTTCTACCGTTGAAGCCCAAACCGCAGAAATTGCACGTTTAAACGAGTTGTTGGCGGCCGGCGGCGTTGTAACTGCTGAAGATTTGGCACGATTAGATCAACTTATTGCCAACGTTTCAGGCATTGTCAACCCTGAAGTTTAA	P029	330	Signal peptide	-1	24140	24469
A-1-L000032	22328	22672	1	hypothetical protein	MYVYPPRIINGTLYKSTDLAEYTRGKILQTLSIVRGELVADPFFGVPLRLFSNINDYQSDVSKIQIILEEEITEAQFIVTGDLKNNGIVSLTVYWAYLGTENIENFEIDTSNIF	A-1(L)	ATGTATGTTTATCCCCCTAGAATAATAAACGGTACTTTGTATAAATCTACGGATTTAGCAGAATACACGCGTGGTAAAATTTTACAAACTTTATCTATTGTGCGTGGTGAGTTAGTAGCTGATCCGTTTTTTGGTGTACCATTGCGTTTATTTTCTAATATAAATGATTATCAATCTGATGTTTCAAAAATACAAATAATTTTAGAAGAAGAGATAACAGAAGCTCAATTTATTGTAACCGGTGATTTAAAAAATAATGGTATAGTCTCTTTGACAGTTTATTGGGCATACTTAGGAACCGAGAATATAGAAAATTTTGAAATAGATACAAGTAATATTTTTTAG	P030	345	NA	1	24565	24909
A-1-L000033	22695	23867	1	baseplate wedge protein	MTTDLNAPQLVVDDYEQLIIDSLVHTNVVSNGEFTDLDASGFMRPFAGTMAYAGSELLYKANLASIAAAKSFFKNVLGVPEDTGTKATTTLQFGLSASLSTDFIVPINFQVSDLSGTLRFYTIGNLVIPAGATFGTIEAIAEDIGEKYNVSANFIDQYSTPLTYLQYVTNIRPATNGRSGETIDNLIERCAQIIRIRNPVSALDFEQLAELTMGEGSRCKAIGLLGINKIVTDPQPGVVHLFLLDVNGNPADPVTISTVGATLQPRIMLGTRLLISPMEVLNIELELIALSDSSKTFQQLADDILEALKVFFNPANLTPGEPVLIEEVKFAIRSVGGLSISYLQMNDNAINIPMPNQWTIPRFSYIGFELTDSEGTVYRDNVVTVTNPEE	A-1(L)	ATGACCACTGATTTAAATGCTCCTCAATTAGTTGTAGATGATTATGAACAACTTATTATTGACTCGTTAGTGCATACTAATGTGGTAAGTAACGGTGAGTTTACCGATTTAGACGCTTCTGGTTTTATGCGTCCATTTGCAGGAACGATGGCTTATGCTGGCAGTGAATTATTATATAAAGCTAATTTAGCTTCTATAGCGGCTGCAAAGTCGTTTTTTAAAAATGTGTTAGGTGTACCTGAAGATACAGGTACTAAAGCAACAACAACATTACAATTCGGTTTATCAGCTTCATTGTCTACAGATTTTATAGTACCTATAAACTTTCAAGTTTCGGATTTGTCTGGCACTTTAAGATTTTACACAATTGGAAATTTAGTAATTCCTGCCGGTGCAACT…	P031	1173	NA	1	24932	26104
A-1-L000034	23867	24442	1	tail collar protein	MSKDAFTAWNVDRRPIYSRMPKEQVGTSYHDYIATDWLTAYWDKIFIECYDKLEDLPRQFDPLQCDEEYLDFLAPLCGWTAPYWSGDYPPESKRVLLANSYSLIWRDKGSLTVLSFVLNALFINHRIFVPGSFILGQSQVSEDTLGAAGWEFEILLPRDYAENGYEFRLTLKIASLFSPLWCKYRVRYDNL	A-1(L)	ATGAGTAAAGACGCTTTTACGGCTTGGAATGTTGACAGGCGGCCTATTTACTCTCGAATGCCTAAAGAGCAAGTAGGAACAAGTTATCATGATTATATTGCTACCGATTGGTTGACAGCTTATTGGGATAAAATCTTCATAGAGTGCTATGACAAACTTGAAGACTTGCCAAGACAGTTTGACCCTTTGCAGTGTGATGAAGAATACTTAGACTTTCTTGCACCGTTGTGTGGATGGACAGCGCCGTATTGGTCAGGAGATTACCCCCCGGAGTCAAAACGAGTTTTATTAGCTAATTCTTATTCTTTGATCTGGCGTGATAAAGGCAGTTTAACAGTGCTTTCCTTTGTGCTTAATGCTTTGTTTATCAATCATAGAATTTTTGTACCGGGATCTTTT…	P032	576	NA	1	26104	26679
A-1-L000035	24464	25852	1	hypothetical protein	MTNIVGRIGFLTTGKLGIKLRGVLIDESTTPNTTYLPGIESFFNITANVLTSVSYPETETQNVTATFSIYSVDGSSNPVFPALLSFDAIVPNVASVEFDVLAPTGVVNNQLDTSALRIAKIIANDPALAQKVAGAPYPRGAYSATETYLYGEMVSYFGKNYISKSLSPIINILPTVTDSWYELVITLPESVSVIATGSDTAYGTGWNGSLLVPTQNAVYDKIVTVDAAIATANTNITNLGTAKADLSYVNTQLSADQVVLDALSSGKADLSYVNTQLNSKANLNGAVLVNATTATPPISDNDTSLATTQHVRSFNHSRLAFNAFRGGQQGVPSLSYVTTTAQFNSSSVRSGWGDNFSSNRWLVGEGGTYLITVTTRFATVGGTPPTYFDALLFVGLSGS…	A-1(L)	ATGACTAATATTGTAGGAAGAATAGGTTTTTTGACCACTGGTAAATTAGGTATAAAACTTCGTGGTGTGTTAATTGATGAATCTACCACACCCAATACTACATATTTACCAGGAATTGAAAGCTTTTTTAACATTACTGCAAACGTTCTTACCAGTGTTTCTTATCCTGAAACAGAAACACAAAACGTTACAGCAACTTTCAGTATTTACAGTGTTGACGGATCATCTAACCCTGTATTCCCTGCTTTGTTGTCTTTTGATGCCATAGTTCCAAACGTTGCATCCGTTGAATTTGACGTGTTAGCTCCCACTGGAGTAGTTAACAATCAATTAGACACATCGGCTTTACGTATAGCAAAAATAATTGCTAACGACCCTGCTTTGGCTCAAAAAGTTGCA…	P033	1389	NA	1	26701	28089
A-1-L000036	25868	27007	1	tail collar protein	MVRKVFNDGDILYAEDVNIIGQPFVDGQDLLGHGLKVDDNSLSDEPQNIKTRFYAWYNRFRVTVQSGLTLSVTQGSISVSGNIISFPPQTINAIDNANSFVWIGKTDADPAIALRVSQTLPNVCIPLARVIAASGSVTSVTDLRDVSVDILPPSIPDAVPVGSTIISLIPPTAPIPAGYLELLNSSQNVSRTTYSALFALWGTYYGNGDGSTTFGVPGTGGRFLRLGGSGLSVGDIGGSNQITIPTNALPSHQHGIPANTHTHSVNDGGHGHTINQTPHSHSISDPGHAHGVPFGAAVDNGNNAFDTGGSPYNNGIGTTQNQTGISVNTANANLSINTSSTGISIQSASTGLTVTSNAGNGQAFQHDQPYLVFRVFVKV	A-1(L)	ATGGTACGTAAAGTTTTTAATGATGGTGATATTCTTTACGCGGAAGATGTAAATATTATAGGTCAACCGTTTGTTGACGGACAGGATTTATTAGGGCATGGTCTGAAAGTTGATGATAACTCATTATCGGATGAACCTCAAAATATTAAAACTCGTTTTTACGCGTGGTATAATCGCTTTCGAGTAACTGTACAAAGCGGTTTAACACTTTCGGTCACTCAGGGTAGTATCAGTGTTTCAGGAAACATTATAAGCTTTCCTCCACAAACTATAAACGCCATAGATAACGCAAACAGTTTTGTCTGGATAGGCAAAACCGATGCAGATCCGGCGATCGCATTAAGAGTTTCACAAACTTTGCCAAACGTTTGCATACCGTTAGCCCGTGTCATTGCTGCA…	P034	1140	NA	1	28105	29244
A-1-L000037	27072	27266	-1	hypothetical protein	MKILSIHCEERLIRFEELANDPTYGVERAIKGLESWKSTQKYRLTDIDNKHIDSYIKRYKSRKK	A-1(L)	ATGAAAATTTTATCTATCCACTGTGAAGAAAGATTAATAAGATTTGAAGAATTGGCGAACGATCCAACATACGGAGTAGAAAGAGCTATAAAAGGTTTAGAAAGTTGGAAATCCACTCAAAAGTACAGATTAACAGATATAGATAACAAACACATAGATTCTTATATAAAAAGATATAAGAGTCGTAAAAAATAA	P099	195	NA	-1	29309	29503
A-1-L000038	27277	27705	-1	hypothetical protein	MTRLTFAQVSEEFQSMGYELKREKKGYSCEVSNKFKNLKDAQEWLYNQVSSAKVEKSEIEENEELQSVIYVFGVRNCQEKHVEKIIETMKHDISEESVTINEDGTISALVYELDPDNGDNQSLYISEWVDKFPCIALVKTIY	A-1(L)	ATGACACGCTTAACATTTGCTCAAGTTTCAGAAGAATTTCAATCGATGGGATATGAATTGAAAAGAGAAAAAAAAGGGTACAGTTGCGAAGTGTCTAATAAATTTAAAAATCTAAAAGATGCTCAAGAGTGGTTATATAATCAAGTGTCTTCAGCAAAAGTAGAAAAATCCGAGATTGAAGAGAATGAAGAATTACAATCAGTAATTTACGTGTTTGGTGTTAGAAATTGTCAAGAAAAGCACGTTGAAAAAATAATAGAGACTATGAAACATGACATAAGTGAAGAATCTGTAACTATAAATGAAGATGGAACAATAAGCGCTCTTGTATATGAATTAGATCCAGATAACGGCGACAACCAAAGTTTATACATATCAGAATGGGTTGATAAATTTCCA…	P035	429	NA	-1	29514	29942
A-1-L000039	27899	28207	-1	hypothetical protein	MTAINSENREAWQVLATTLSNQNPGVGKNVKIVDGRKHKGKTGKVIKHQRDRYSDAFRYGDSATHHLREIKGRYGYVCLIKDDTGSTFWVKAEYTEVVEKEN	A-1(L)	ATGACCGCAATAAATTCAGAAAACAGAGAAGCTTGGCAAGTGTTAGCTACAACATTATCAAATCAAAACCCCGGTGTGGGTAAGAATGTAAAAATAGTTGATGGTAGAAAACATAAAGGTAAAACAGGAAAAGTTATCAAACATCAAAGAGATCGATATTCAGACGCTTTTAGATATGGTGATAGTGCTACTCATCATTTAAGAGAAATAAAAGGAAGATACGGTTATGTATGTCTGATCAAAGACGACACAGGTTCAACATTTTGGGTAAAAGCTGAATATACTGAAGTTGTTGAAAAAGAAAATTAA	P036	309	NA	-1	30136	30444
A-1-L000040	28330	28497	-1	hypothetical protein	MNKSNKYTQLKIKADKLSKTLFRLRLALKTPQLIEMENDNDELRHCLYLLSLESL	A-1(L)	ATGAACAAATCGAATAAATATACACAACTGAAAATAAAAGCCGACAAGCTAAGTAAAACATTGTTTAGACTCCGGTTAGCTTTAAAGACTCCACAGTTAATAGAGATGGAAAACGATAACGATGAATTACGACACTGTTTGTATTTGTTATCGTTAGAGTCACTCTAA	P100	168	NA	-1	30567	30734
A-1-L000041	28481	30418	-1	DNA polymerase	MKSFEYKIENGTITIDENSLDLFSYHEEPIPDWEPTGDIKPFNELTRLGIDIETTGLNPENNRIMLIGIYNESGKYHVFHDEDERKMLIAFIGVLNRKKPDILEGFNHIEFDLKFIIKRCQKLRIPHPFTIAQKETTIRTAQQFGKPFTFFHIWLKYEDAPRSQHTAVIDLYPAVLQWDFVKRKLTKYTLKQSVLQMGLRKEARTELTYSQMMEEWENREENNLSLLKEYLQFDLEDTKLLADFLLPAIYYQKLFIPDWKLQSIATAGFGSKWNDILKREYSHEPLPVSDTRKHFEGGLTDSIYGFFKNVIKIDVASLYPSIMLTYGVCSSKDHRKVTLSILKYMKNKRLQAKAIANDSGASEQQKLEAENMSGAMKLFLNSKYGALGTQGIEFNDYVA…	A-1(L)	ATGAAATCATTTGAATATAAAATTGAAAATGGTACTATCACCATTGATGAGAACTCATTAGACCTTTTTAGCTACCATGAAGAACCAATCCCCGACTGGGAACCTACAGGAGATATAAAACCTTTTAACGAGCTTACACGGTTAGGAATAGACATTGAAACCACCGGATTAAATCCTGAGAACAATCGCATCATGTTGATCGGGATTTATAACGAATCAGGGAAATATCACGTTTTCCATGATGAAGATGAAAGAAAGATGTTAATAGCTTTCATCGGGGTGTTAAACCGTAAAAAACCCGACATTCTTGAAGGTTTTAACCATATTGAGTTCGACTTAAAATTTATTATCAAGCGCTGTCAAAAACTGAGAATTCCTCACCCGTTCACAATTGCCCAG…	P037	1938	NA	-1	30718	32655
A-1-L000042	30514	30705	-1	hypothetical protein	MTKNYEVMTKIEESLEYLLMSVEALGDVEGDNRTLTSIYNQQIILLNALQSQLNIYKDAHENE	A-1(L)	ATGACTAAAAACTATGAAGTGATGACCAAAATTGAAGAATCTTTAGAATATCTTTTGATGTCTGTAGAAGCGTTAGGAGATGTTGAAGGGGACAACAGAACATTAACAAGCATTTACAATCAACAGATAATACTGCTAAACGCTTTACAATCCCAACTCAACATTTATAAAGATGCTCACGAAAACGAATAA	P038	192	NA	-1	32751	32942
A-1-L000043	30708	30920	-1	hypothetical protein	MSISDIDIEIYGEWENDTSKFWNWCDHCDRITTVICTVDPYIDELYKDDEIDNTESNWCRVCYCKRKEEI	A-1(L)	ATGTCAATAAGCGATATAGATATCGAAATTTATGGAGAATGGGAAAACGATACTTCAAAATTTTGGAATTGGTGCGATCATTGCGATCGGATAACCACGGTTATTTGCACAGTCGATCCTTACATTGATGAGCTTTACAAAGATGATGAGATAGATAATACAGAATCTAACTGGTGTAGGGTTTGTTATTGTAAACGTAAAGAAGAGATATAA	P039	213	NA	-1	32945	33157
A-1-L000044	30920	31126	-1	hypothetical protein	MKMNKVAPLSIRRELIEKLVIYNIDAKEALKNGKVPESNFNIVKKIIARNNMTVAKFIEDVTFVSELN	A-1(L)	ATGAAAATGAATAAAGTTGCACCGCTTTCAATTCGGCGAGAACTAATTGAAAAACTTGTGATTTATAACATAGATGCCAAAGAAGCTTTAAAAAATGGCAAAGTGCCTGAAAGCAACTTTAACATTGTTAAAAAGATAATTGCCCGTAACAATATGACAGTTGCAAAGTTTATTGAAGACGTAACGTTTGTAAGTGAGTTAAATTGA	P040	207	NA	-1	33157	33363
A-1-L000045	31113	32528	-1	helicase	MIELREYQYEQLNKLNSATVNTCIQSPTGTGKSVVIKSFTERVNDSGGKVAIIAPNRELVQNIAGYFPAIATTAYTGVKPDLSKSIFVSTYKSYAKYFKAFDHDLMLVDEGYHLPSPTIKRIMEQSKGLTHCLTATPNRLDGAGLFPQMRDLHLSPQISWFINEGFLSDYQLITSECPLFKSSDGSDDLGSQSKLFGSTPECFKTVQMYHEQCYEERAIIFVSGQDHGQKLVNMFNDSGVYAEFVTSKTDKDHRDRCLELFKTGHLKVLININLFTEGVNIPQCENVFLCRFTYSTALYLQMVGRLLRVAPGVSKKLFDLASNVWYHGTPKSTFEWSIHGQPWREADNRSSVNFKCEKCDTDLINKKFVKHAATVCCIECGHENYLEPPQEKDAKQRFL…	A-1(L)	ATGATAGAACTTAGAGAATATCAATACGAACAGTTAAACAAGTTAAATTCAGCAACCGTCAATACCTGTATACAATCGCCAACGGGAACAGGTAAAAGCGTCGTTATAAAGTCGTTTACAGAGCGTGTAAATGACTCCGGGGGTAAAGTTGCTATCATCGCTCCTAACCGTGAATTGGTGCAAAATATCGCCGGATACTTTCCAGCGATCGCAACCACCGCATACACCGGAGTCAAACCAGATTTGTCAAAAAGTATTTTTGTTTCAACATACAAAAGTTATGCAAAATACTTTAAAGCTTTTGACCATGATTTGATGTTAGTTGATGAGGGTTATCATCTACCATCACCGACAATCAAGCGGATAATGGAACAGTCTAAAGGATTGACCCATTGCTTG…	P041	1416	NA	-1	33350	34765
A-1-L000046	32525	32755	-1	hypothetical protein	MKKVDMDIIFFETDCIYCFYSDYETLCNLGKVLESVNLDPSWYETEALNVQSEKVLQPLINAYCDLMNIKPHWNKR	A-1(L)	ATGAAAAAGGTTGACATGGACATCATATTTTTTGAAACTGATTGTATTTATTGTTTTTACTCAGACTATGAAACGTTGTGCAACCTTGGCAAAGTTTTAGAATCTGTTAATCTTGATCCGTCGTGGTATGAGACGGAAGCGTTAAACGTTCAATCTGAAAAAGTTTTGCAACCACTGATAAACGCTTATTGTGATTTGATGAACATTAAACCTCATTGGAACAAAAGATGA	P042	231	NA	-1	34762	34992
A-1-L000047	32752	33069	-1	hypothetical protein	MRNTYTYNGFTGTKKQWSERLGIGYQSMLRRFDKHWPDRPEKVFSVVYLTPGANMPGETCKAAKKRSDESMKKQYRYCQLLAVRKSVKQQLATVEKQIKDNGFGR	A-1(L)	ATGAGAAATACATACACTTACAATGGATTCACAGGCACTAAAAAGCAATGGTCAGAGCGTTTAGGTATCGGTTATCAATCAATGTTGCGAAGATTTGATAAACACTGGCCTGATAGACCGGAAAAAGTATTTTCAGTGGTTTATCTGACTCCGGGGGCAAATATGCCGGGGGAAACCTGTAAAGCTGCTAAAAAGCGTTCTGACGAGTCGATGAAAAAACAATACAGATATTGTCAATTGTTAGCAGTGCGGAAAAGCGTTAAACAGCAATTAGCAACCGTTGAAAAGCAAATTAAGGATAACGGATTTGGAAGATGA	P043	318	NA	-1	34989	35306
A-1-L000048	33066	33179	-1	hypothetical protein	MSILQLFLSLAITTVVCFVFACMIFGLIMMIGEFFIK	A-1(L)	ATGAGTATTTTGCAATTGTTTTTAAGTTTAGCAATAACAACTGTGGTCTGTTTTGTTTTTGCTTGTATGATATTCGGTTTAATAATGATGATAGGGGAGTTCTTTATAAAATGA	P101	114	1 TMP	-1	35303	35416
A-1-L000049	33346	34434	-1	hypothetical protein	MQTVFLGTCWDSVKSIDILAQAGYNIEKETKGIIKLENLLPEEQEIFKGLCVLLDLKYGEDVTNVGLSIFNDDWQYVYFTYPCVGIGEKDQLGLMIGCGNSTEKAAFLPMVYTPGKDDESGDYHLVTPKGKKVKVGLTSIPGSDNKTRHYLMIKNKSFIFNIPFKSASDDLSTGFVNSAFDDGTFHECCKSFLKAGVKFSTMFKKAFLDGYFPEGGVILVLAKGKISESEQYGRSSIWEVVSSSHPDLIVLDSAKETPGEMELKDAGTIFCSNACAASKHLFAGKSGQDPFIIWVKARNPNNINHLPQHDGYQIALVPPKFKAKFPAMLEQAKQIALGNFQSNMKQLNTNNAMVDDPALADF	A-1(L)	ATGCAAACAGTATTTTTAGGCACTTGTTGGGATTCTGTAAAATCTATTGACATTCTGGCTCAAGCTGGATACAACATCGAAAAAGAAACAAAAGGTATCATAAAGCTTGAAAATTTGTTGCCAGAAGAACAAGAAATTTTTAAGGGTCTTTGTGTTTTACTCGATTTGAAATATGGGGAAGACGTGACAAACGTAGGTTTGTCAATTTTCAACGATGATTGGCAATATGTTTATTTTACCTACCCATGTGTAGGTATAGGTGAAAAAGACCAATTAGGTTTAATGATTGGTTGTGGAAATTCGACTGAAAAAGCAGCATTTTTACCGATGGTTTACACTCCGGGTAAAGATGATGAAAGCGGTGATTATCATTTAGTTACACCTAAAGGTAAAAAAGTT…	P044	1089	NA	-1	35583	36671
A-1-L000050	34585	36177	-1	hypothetical protein	MKKPLGNFLKSEIDDKYVEAKKKLLLIKTLGIVSVGLFASAVANPKQPKYDLVGQLGLSSLFSLVAAYVCKENTDLFAQYDTFVKMNREHKKDELRLNFGKAMVINEVANEIDLASRLQNLPASAQVRYINKYQLQGLLNPVVETDVESYLISEKNDQYSLSLSSDLRELERKTEVDLSWIDSDFINSSKIVVGAKGSGKSIYLRYEAARWLIENPTGYLLIIDPHYDRRLESKHWLKNLDQRLVMKMFLCKFKDTKNHGESNEWKGYLYHIRNCWVELQSRINDLGDFDDEDNPPVYTKVKVIIDELENIKNSCTELEYKEILKFIECVQNEGRKFNFEITIGMHGLKKETTGLDSTTVAQMNWFLFEKACYDSATKFPADFDSREIKEISKQISNNL…	A-1(L)	ATGAAAAAACCACTAGGCAATTTTTTAAAGTCGGAAATTGATGATAAGTATGTGGAAGCTAAAAAAAAGCTTTTGCTTATCAAAACGTTGGGTATAGTGTCTGTCGGTCTGTTTGCATCAGCCGTGGCAAACCCAAAACAACCAAAATATGATTTGGTAGGTCAATTGGGATTAAGTAGCTTATTCTCGCTTGTAGCTGCTTACGTGTGTAAAGAGAACACGGATCTTTTTGCTCAATATGATACGTTTGTAAAAATGAATCGTGAGCATAAAAAAGACGAATTGCGTTTAAACTTCGGAAAAGCAATGGTAATTAACGAAGTGGCAAACGAGATCGATTTAGCATCAAGACTGCAAAATTTACCAGCATCAGCACAAGTAAGATATATCAATAAATAT…	P045	1593	2 TMP	-1	36822	38414
A-1-L000051	36217	36474	-1	hypothetical protein	MGTYTAISATTLLGIINPQFRLICGVLVFGYLLYAGSDTYKIAIEHYEEHRRYYKDSFIYAISRNALDIGCFVLSLTVAVFLAIA	A-1(L)	ATGGGAACATACACAGCGATATCCGCAACTACTTTACTAGGGATAATCAATCCACAATTTAGATTGATTTGCGGTGTGTTAGTTTTTGGTTATCTTTTATACGCTGGTAGTGATACTTACAAAATTGCTATTGAACACTATGAAGAACATCGACGGTACTATAAAGATTCTTTCATTTACGCAATCTCGCGTAATGCTTTAGACATCGGATGTTTTGTTTTGTCGTTGACGGTTGCTGTTTTTTTAGCGATCGCTTGA	P046	258	2 TMP; Signal peptide	-1	38454	38711
A-1-L000052	36492	36686	-1	hypothetical protein	MYHYHVDFTCGKIRNYGKISIKRKILVSTYEVCMMEIHNQIRTAYNADFDQNIIIHNFQLLEHN	A-1(L)	ATGTATCATTATCACGTTGACTTCACTTGCGGAAAAATTAGAAATTACGGGAAAATCTCGATAAAACGTAAAATACTGGTCAGCACTTACGAAGTTTGCATGATGGAAATACACAACCAAATAAGAACGGCTTATAATGCTGATTTTGATCAAAACATTATTATTCATAACTTTCAATTATTGGAGCATAATTGA	P047	195	NA	-1	38729	38923
A-1-L000053	36802	37254	-1	hypothetical protein	MFGDNHSHNASNTSGSAIIKSGYDVTSLAGDTELLKPTFQNALKIGSLKDATEKSIYQAAKDAGTMRGLGVMFKNYSREKLNVAKAALGLKNAAMAHQKQAANLELQWEQGTARHLQGMSETLLQLGITQENHTGFTTYCDTADKLLKGL	A-1(L)	ATGTTCGGTGATAATCATTCTCACAACGCTTCAAATACAAGCGGTTCGGCAATTATCAAATCTGGTTATGATGTAACATCGTTAGCCGGTGATACCGAATTACTAAAGCCCACTTTTCAAAATGCTTTAAAAATTGGTAGTTTGAAAGATGCCACAGAAAAAAGCATTTATCAAGCTGCAAAAGACGCGGGAACAATGCGCGGTTTAGGTGTAATGTTCAAAAATTACAGCCGTGAAAAACTCAACGTTGCTAAAGCTGCTTTAGGTCTAAAAAATGCTGCTATGGCACATCAGAAACAGGCCGCCAACTTAGAGTTACAATGGGAACAAGGAACCGCAAGACATTTGCAAGGAATGTCGGAAACTTTGTTGCAGCTTGGTATCACTCAAGAAAACCAT…	P048	453	NA	-1	39039	39491
A-1-L000054	37244	37528	-1	hypothetical protein	MEDKEQIKIQMDTKGFLKIEGKISPQSKEIISQAMQQAEYYRLKTAQENKSVDDQTTVIVVSFMLLLTFMIWSVSNKIGNSFKQQNTTEINYVR	A-1(L)	ATGGAGGACAAAGAACAGATAAAAATACAAATGGACACGAAAGGATTTTTGAAGATAGAGGGGAAAATCTCCCCTCAATCTAAGGAAATCATTTCTCAAGCGATGCAACAGGCTGAATATTACCGTTTAAAGACTGCCCAAGAGAATAAAAGCGTTGATGATCAAACAACTGTCATAGTGGTTTCATTCATGCTTTTACTCACTTTTATGATTTGGTCTGTAAGTAATAAAATCGGCAACAGTTTTAAACAACAAAACACCACGGAGATCAATTATGTTCGGTGA	P049	285	1 TMP	-1	39481	39765
A-1-L000055	37624	38208	-1	hypothetical protein	MKNSNIPLIRTRLHRKGVTGLSADEIKTALENNNDDIDATVSELLSKYQTAIATTENDSVEPPESEEDFKALLKINSNNDDQTVAMIKSEAQGMGLTIPVNHLNDIAVSVKQSRTFQSDKLKAIKSALIAYIDWQHEQSSNEAEETIREVKQHATNKAVEFNNQMVGELSEFFRTQQESTDEFTNELIKALSVG	A-1(L)	ATGAAAAATTCAAACATTCCTTTAATACGGACTAGACTTCACCGCAAAGGCGTTACAGGATTATCAGCAGACGAGATCAAAACAGCGTTAGAAAACAACAATGATGATATTGACGCTACAGTATCAGAATTGCTTTCCAAATACCAAACGGCGATCGCAACTACTGAAAATGACTCCGTTGAACCCCCGGAGTCAGAAGAAGATTTTAAAGCGTTGTTAAAAATAAATAGCAACAACGATGATCAAACCGTTGCGATGATCAAATCGGAAGCGCAAGGAATGGGTTTAACCATACCCGTAAACCATCTTAATGACATTGCGGTCAGTGTTAAACAGTCTCGCACATTCCAAAGCGACAAGCTGAAAGCGATTAAAAGCGCTTTAATTGCATACATCGAT…	P050	585	NA	-1	39861	40445
A-1-L000056	38343	38858	-1	hypothetical protein	MAITFRNKHPKNPRADKKITPMRERIENWINNNQDMFNGEPKLQLHQIKRIESELTANYGDPVNITNEVLENYFKLKLYFPRTPYIKTLIDKAVKITKQLDKDRDGMIDAETLYSTITKISEFADSTIYAWFKRLNANFCTIGVYHINTVVMVVYLALVKDAKDSKKLPMV	A-1(L)	ATGGCTATCACATTCAGAAACAAACATCCCAAAAATCCCCGTGCCGACAAAAAAATTACGCCGATGCGGGAACGTATTGAAAACTGGATAAACAACAATCAAGATATGTTTAACGGTGAACCTAAATTACAACTTCATCAGATAAAACGTATTGAAAGTGAATTAACAGCAAATTACGGCGATCCTGTAAATATCACAAACGAAGTGCTAGAAAACTATTTCAAATTGAAATTGTATTTTCCCCGTACACCATACATCAAAACTTTGATAGACAAAGCTGTAAAAATTACTAAACAGCTAGATAAAGATCGAGACGGTATGATCGATGCGGAAACGTTGTACAGCACTATTACAAAAATTTCAGAATTTGCCGATTCAACCATATACGCATGGTTCAAA…	P051	516	NA	-1	40580	41095
A-1-L000057	39277	40167	-1	antirepressor	MSNFDLSIASNLYNSTEQYPVDFDQAWEWLGYSRKNNAKQAFLNFGFVQNVDYLLLIDQQSVNHEGFSAQEKAVNARKETIKLTCECLKVWGMMANTDKGKEVRQYFLECERIAKSKWQQAESVERVGKLFNDAVFHYKALEKLSPAYTTHFLDVVGIRPISPQTSENDLKASLVANRLGLAFNKQIKAFETLSDALSPEAFDNLKQAYYKLAEDYAELLKIAKPRTAYIEKIIEVPVEKVTIKTEYVEIERDREETVLKVHLLERELEALKQRHEELKREYAVQANNNIKRLTGN	A-1(L)	ATGTCTAATTTTGATTTGTCGATCGCTTCCAATCTCTATAACTCCACCGAACAGTATCCGGTAGATTTTGATCAGGCTTGGGAATGGTTGGGATACTCTAGAAAAAACAACGCAAAACAAGCGTTTTTAAATTTTGGATTTGTTCAAAATGTTGATTATTTACTGCTGATTGATCAGCAATCTGTCAACCATGAGGGTTTCAGCGCTCAAGAGAAAGCAGTTAACGCAAGAAAGGAAACAATTAAACTCACTTGCGAGTGTTTGAAAGTTTGGGGAATGATGGCAAACACTGATAAAGGTAAAGAAGTCAGACAATATTTTCTAGAATGTGAACGTATAGCCAAAAGCAAATGGCAACAAGCTGAATCAGTCGAACGAGTTGGAAAGTTGTTCAACGAC…	P052	891	NA	-1	41514	42404
A-1-L000058	40181	40324	-1	hypothetical protein	MGANKVPMFGLRIPPKLRNELEVYAKDKEKNLTAVILDAIRFYLDNQ	A-1(L)	ATGGGAGCCAACAAAGTACCGATGTTCGGTTTGCGTATACCACCAAAACTAAGAAACGAATTAGAAGTATACGCGAAAGACAAAGAAAAAAACCTGACAGCAGTCATACTTGATGCCATCAGATTCTATCTCGATAACCAATAA	P053	144	NA	-1	42418	42561
A-1-L000059	40467	40703	-1	hypothetical protein	MIDLISLFTNIFIGYILIATVINLFLIFYYIIDGFYLNCYTGNRKLDEIISLINRDTTTIFFVSFLWIGVLLHLFEKE	A-1(L)	ATGATTGACCTAATTTCACTTTTCACCAACATTTTTATCGGTTACATATTGATAGCAACGGTTATCAATCTCTTTCTAATTTTTTACTACATCATCGACGGTTTTTATTTAAACTGTTATACCGGAAACAGAAAATTAGATGAGATTATATCACTGATAAATCGAGACACGACTACAATTTTTTTTGTCAGCTTTTTATGGATAGGTGTTTTGTTACATCTGTTTGAAAAAGAATAG	P054	237	2 TMP; Signal peptide	-1	42704	42940
A-1-L000060	40700	40954	-1	hypothetical protein	MIQFLINAFLFYVSIAFLIFLVYTYFEFQNTFPLFTFFIFPKMKEEYKEIIRQMNRDYDLQKKSIILCWPIYLTLFAFFGIVMR	A-1(L)	ATGATTCAGTTTCTGATAAACGCTTTTTTGTTCTATGTGTCTATCGCTTTTTTGATATTTCTCGTATATACTTACTTTGAATTTCAAAACACTTTCCCCCTATTTACTTTTTTCATCTTTCCGAAAATGAAAGAAGAATATAAAGAGATAATACGGCAAATGAATAGAGATTATGATCTCCAAAAAAAGAGTATAATTCTCTGTTGGCCTATATATCTAACGTTGTTTGCTTTTTTTGGAATAGTAATGAGATGA	P055	255	2 TMP	-1	42937	43191
A-1-L000061	40951	41193	-1	hypothetical protein	MIDFLSDVLKVLFSIYMAVFLSVFVLIESLFITIGDDLDLTTEQREFAKRWNNHRKHWEAFKIACQWPKILINAMMDGEL	A-1(L)	ATGATAGATTTTCTTTCTGATGTTTTAAAAGTGCTTTTCAGTATTTACATGGCTGTTTTTCTGTCGGTGTTTGTTCTGATTGAATCTCTTTTCATTACTATAGGAGACGATCTTGATTTGACCACAGAACAGCGAGAATTTGCCAAACGATGGAACAATCATAGAAAGCACTGGGAAGCGTTTAAAATCGCTTGTCAATGGCCTAAAATACTAATCAACGCAATGATGGACGGTGAATTATGA	P056	243	NA	-1	43188	43430
A-1-L000062	41300	41893	-1	DNA N-6 adenine methyltransferase	LKNEHYTPRAIFDYIHCVSGEIDLDVASDEIGNRAARAKKYFTKDDDGFTKDWEANVVFCNPPGRTKESMHLPGQTEWFNKMCFEHRARSFTEGWFIGYSIELLCKVGYNAFKYCLCVPQPGKQTGNSHFVSGMGRVMFDAYDPVTDERVKQKSPMHGNVIIYFPPMNYKFSNVQIPKFEKVFKNVGAIHLSTDYQK	A-1(L)	TTGAAAAATGAACATTACACGCCACGGGCTATTTTCGATTACATACATTGTGTAAGTGGTGAAATAGATTTAGATGTTGCCAGCGACGAAATCGGTAATCGTGCAGCCAGAGCTAAAAAATATTTTACAAAGGATGACGATGGATTTACAAAAGATTGGGAAGCAAATGTAGTGTTTTGTAATCCCCCCGGACGAACAAAAGAATCGATGCACTTACCCGGACAAACGGAGTGGTTTAACAAAATGTGCTTTGAACATCGTGCTAGGAGTTTTACAGAGGGATGGTTTATTGGTTACAGTATTGAGTTGCTCTGCAAAGTGGGATACAACGCTTTTAAATACTGTTTATGTGTTCCTCAGCCCGGAAAACAAACAGGAAACAGTCATTTTGTTTCAGGT…	P057	594	NA	-1	43537	44130
A-1-L000063	41883	42002	-1	hypothetical protein	VTPGDSKNPGVTNQHLTAINILEGIETNNGVTSRIMFEK	A-1(L)	GTGACTCCGGGTGACTCTAAAAACCCCGGAGTCACCAATCAACACTTAACAGCGATAAACATTTTAGAAGGGATTGAAACTAACAATGGTGTCACATCACGGATCATGTTTGAAAAATGA	P102	120	NA	-1	44120	44239
A-1-L000064	42011	42301	-1	hypothetical protein	MNLKPGFYKITQVIDEYGKTHKMENNMIDSNVKTIKLITGATYKFLINDDLKMIVNAVFKEIEIDENVIKYTFQIDGNDYKLTEGILRKFLKLPMK	A-1(L)	ATGAATCTCAAACCAGGATTTTACAAAATTACTCAAGTTATAGATGAGTACGGAAAAACACACAAAATGGAAAACAACATGATCGACTCAAATGTAAAAACAATAAAACTAATCACCGGTGCAACTTACAAATTCTTGATAAATGACGATTTGAAAATGATTGTAAATGCTGTTTTCAAAGAAATAGAAATAGATGAAAACGTCATCAAATATACTTTTCAAATTGACGGAAACGACTACAAACTAACAGAAGGTATACTTAGAAAGTTTTTAAAACTGCCGATGAAATAA	P058	291	NA	-1	44248	44538
A-1-L000065	42350	43186	-1	hypothetical protein	MTRLTVKSVTEYAQTHGYELEVRNSTKDKYHIRVAGESPETKIFETTYRTLNDIMLCINEGHLLDGQSESVEFEIDEQRLSNSELKASKQYHDFVATGNTESYLNDSGEHPTFEEVATAIAPYGYELHRNNGQFFTESKAPYIYFKSGQSEYALHVTYFLDTILDNVQEFESFMVNNQRYQQIAFELFNMNDVCPDDYSYMALSNRLKMLEKRLINAVEQRRLNVRQICSEIGQMVREWSSGQGFGNTVKRVSRKVARHAKRFYTMLTERVAPKYTVQ	A-1(L)	ATGACACGCTTAACAGTCAAATCAGTTACAGAATACGCTCAAACCCACGGATACGAATTAGAAGTAAGAAACAGCACAAAAGATAAATATCATATTCGTGTTGCTGGTGAATCTCCTGAGACAAAAATCTTTGAAACTACTTACAGAACGCTTAATGATATCATGCTTTGCATCAATGAAGGTCATTTACTTGATGGTCAAAGCGAATCGGTGGAATTTGAAATTGATGAACAACGATTGTCAAATTCAGAATTAAAAGCTAGTAAACAGTATCATGATTTTGTTGCTACTGGTAATACCGAATCTTATCTCAATGACTCCGGGGAACACCCCACTTTTGAAGAAGTCGCCACAGCGATCGCTCCTTACGGTTATGAGTTACACCGCAACAACGGCCAG…	P059	837	NA	-1	44587	45423
A-1-L000066	43349	43672	-1	hypothetical protein	MKNDEAVNDHSVELISGCWYSTMVKSAMKNIENSKSTESDSQHSVELISGCWYSAMIDSKFKIEYKLRFYSVTITETKSLRYLFFDVDEQGHVLDTSEIRQYRLKLI	A-1(L)	ATGAAAAACGATGAAGCTGTGAATGATCACTCTGTAGAACTAATTAGCGGTTGTTGGTACAGCACAATGGTAAAATCAGCAATGAAAAATATTGAAAACTCCAAATCCACTGAAAGCGATTCTCAGCACTCTGTAGAACTAATTAGCGGTTGTTGGTACAGCGCAATGATTGATAGTAAATTTAAAATAGAATACAAACTCAGATTTTACTCTGTGACTATAACAGAAACCAAAAGCTTGAGATATCTTTTCTTTGATGTTGATGAACAAGGACACGTCTTAGACACTAGTGAAATCAGGCAATACAGATTAAAATTAATTTAG	P060	324	NA	-1	45586	45909
A-1-L000067	43659	43874	-1	hypothetical protein	MEDFSLTLRKDDYYLFEVDVLDVQIICKFLQIDLFIDQVIFVFQKSDYELIFLSHKDLIRYNVKRCNDEKR	A-1(L)	ATGGAAGATTTTTCTTTAACTTTGCGAAAAGACGATTATTATTTATTTGAGGTTGATGTTTTGGATGTGCAAATAATTTGTAAATTTTTACAAATCGATTTGTTTATAGATCAAGTAATCTTTGTTTTTCAAAAATCAGATTATGAACTGATATTTTTGTCTCACAAAGATTTAATCAGATACAACGTTAAAAGGTGTAACGATGAAAAACGATGA	P061	216	NA	-1	45896	46111
A-1-L000068	43874	44410	-1	hypothetical protein	MKTTFIFNDVQVDLTDAFKKRIRLFAQMVYKLDYCPTIRQLEKLLGLKLVKPRGIGANLRQYHLNWMTAYKTIETDLEISEENQYQFANRMDIELKKAIVKYELTGSGKLTTSIDYRFDVYARNDKGFMVCVGYFHADHINKRLTISFSANGVKHPIANIGNGCHKLIAIFKKQPVGV	A-1(L)	ATGAAAACCACATTTATTTTTAACGATGTTCAAGTAGATTTGACCGACGCTTTCAAAAAAAGAATTAGACTATTTGCTCAAATGGTTTACAAATTAGATTACTGTCCGACCATTAGACAGCTTGAAAAGTTACTCGGTTTAAAATTAGTTAAACCACGGGGAATCGGTGCTAATTTGCGTCAATATCACCTAAATTGGATGACCGCATACAAAACAATTGAAACTGATTTAGAAATATCGGAAGAAAATCAATATCAATTTGCCAACCGTATGGATATAGAATTGAAAAAAGCGATCGTCAAATACGAATTAACCGGTAGCGGTAAATTAACTACAAGCATTGATTATCGTTTTGATGTTTATGCTAGAAACGACAAAGGATTTATGGTCTGTGTCGGT…	P062	537	NA	-1	46111	46647
A-1-L000069	44510	44944	-1	hypothetical protein	MKIDVKDFKKIVDEWNCDLVVNRNNTRSHKYFVIDRKTTEILASTSTLEDAEKTFTTVCDRWKKTFIDSGCLSRIVNGDQYYSSYVLIAGKKIKIYYDIFSNEWYCTEIPRHFTSFISAYKYALDMFNDSSSEENMNSVQKALV	A-1(L)	ATGAAAATCGACGTTAAAGACTTTAAAAAAATTGTTGATGAGTGGAACTGTGATTTGGTTGTTAACCGAAACAATACTAGAAGCCACAAATATTTTGTTATTGACCGAAAAACAACAGAAATACTTGCCAGCACTTCCACGCTTGAAGATGCTGAAAAAACATTTACAACCGTGTGCGATCGCTGGAAAAAAACTTTCATTGATTCAGGGTGCTTAAGCAGAATTGTGAACGGTGATCAATATTACAGTAGCTACGTGTTGATAGCTGGTAAAAAGATAAAAATTTATTACGATATTTTTAGTAATGAATGGTATTGTACAGAGATTCCCCGACACTTCACATCGTTTATAAGCGCTTATAAATACGCTTTAGATATGTTTAATGATTCATCTTCCGAA…	P063	435	NA	-1	46747	47181
A-1-L000070	45076	45312	-1	ASCH domain protein	MRHELKTVNPWFTDIIEGRRDFDVRKNDRGYSVGDLLVLREWTGSNYTARKVEKVVKYILRGEDFSEGVKPGYVVLGF	A-1(L)	ATGAGACACGAATTAAAAACTGTAAATCCTTGGTTCACCGATATCATAGAGGGACGTAGAGATTTTGATGTAAGGAAAAACGATAGAGGTTATTCAGTCGGTGATCTGTTAGTGTTGCGAGAGTGGACAGGAAGCAATTACACAGCTAGAAAAGTCGAGAAAGTCGTAAAATATATTTTACGTGGTGAAGACTTCTCAGAAGGTGTAAAACCTGGTTACGTTGTTCTAGGTTTTTGA	P064	237	NA	-1	47313	47549
A-1-L000071	45320	45670	-1	hypothetical protein	MNEPMDTIKIRDDIINRFESCIKKFPHVKERLIKNYFEQCFLHEENARILKLIVTIEKNGIMDFEVYSTVVKEYVDFLPGLEDAMNHSLMNNRVPILISFFPNENYELAFPVSIES	A-1(L)	ATGAATGAACCAATGGACACGATTAAAATACGTGATGATATCATCAATCGATTTGAAAGTTGTATTAAAAAGTTTCCTCATGTTAAAGAACGTTTAATCAAAAATTACTTTGAACAATGTTTTTTGCATGAAGAGAACGCGAGAATACTAAAATTGATTGTCACCATTGAGAAAAATGGTATTATGGATTTTGAAGTGTATTCAACAGTAGTAAAAGAATATGTCGATTTTTTACCAGGATTGGAAGATGCTATGAATCACTCTTTGATGAATAATCGTGTTCCGATACTGATCAGCTTTTTCCCGAATGAAAATTATGAGTTAGCTTTTCCTGTAAGCATAGAGAGTTAG	P065	351	NA	-1	47557	47907
A-1-L000072	45667	46230	-1	hypothetical protein	MIDKYLYYSTGSIKKINPDWVVEQLANEGYTMLSTYESINKPFKFICPNGHKNKITLNNWNQSKRCSMCSHNNVYRNDGAKSFFEKFGYTIIEGEYKNNRSPMKYVCSKGHINTVTLSALKHYNSTCPYCKGTRTSIEDVRKFLSDRGCELLRPLIDFKQEYKVVYKNAKGEIKEKYWRTIKTTKKL	A-1(L)	ATGATTGATAAATATTTGTATTACTCAACAGGCTCGATTAAAAAAATTAATCCTGATTGGGTAGTGGAACAGTTAGCGAATGAAGGTTATACAATGCTTTCAACTTATGAAAGCATTAATAAACCTTTTAAATTCATCTGTCCTAACGGACACAAAAACAAAATTACGCTCAACAATTGGAATCAAAGCAAACGTTGTTCGATGTGTTCACATAACAACGTTTACAGAAACGATGGAGCAAAATCTTTTTTTGAAAAATTCGGATACACAATAATAGAAGGAGAATATAAAAATAATCGTTCTCCGATGAAATATGTGTGCAGTAAAGGTCATATAAACACTGTCACACTTTCAGCGTTAAAACATTATAATTCTACTTGTCCATATTGCAAAGGAACT…	P066	564	NA	-1	47904	48467
A-1-L000073	46264	46668	-1	hypothetical protein	MGKGIGQSGYRGVRKHYTLWKAVLPDETVLGLYATPLDAAIVRERFLHEHRDEFKEVERYLNHVDLAPGVIINTYRKPKKVKPQKRQPRYGKYVYRNRHHNSFFVRIGNYQSKCFPFVSYAIAHRDEYLQNNRK	A-1(L)	ATGGGTAAAGGTATAGGACAATCAGGTTATAGGGGTGTAAGAAAGCATTACACCCTATGGAAAGCGGTTTTGCCGGATGAAACAGTTTTAGGTTTATATGCCACGCCTTTAGACGCTGCAATAGTTCGTGAAAGATTTTTACATGAACATCGTGATGAATTCAAAGAAGTCGAAAGATATCTTAATCATGTTGATCTTGCCCCCGGAGTCATAATCAACACTTACAGAAAACCTAAGAAAGTCAAGCCCCAAAAGCGTCAACCGCGTTACGGAAAGTATGTCTATCGCAATCGACACCATAATAGTTTTTTCGTAAGAATTGGTAATTACCAATCAAAATGTTTTCCGTTTGTCAGCTATGCGATCGCTCACAGGGATGAATATTTACAAAACAATCGA…	P067	405	NA	-1	48501	48905
A-1-L000074	46690	49755	-1	DNA primase	MARQKKESGADNTGNQKQRKEQSIEVDTIINNPENFVNFLFLQHAVALAPGVTKDGLRSAFKMNRNDWKRRKGLENFISAVESGYIHQAEVTIDGDKQYHFGVIDFDFWNKAIAAPIDHAISIEQIKQLPSVKKHFYGLQPSISYRDNAQNCHGYVVFDQPIQSKEEFQKCLKALVEIIRQDIAKVVGLTYSKDLELGVDGCTANNPAQVTFASLEPVTVMGAIASVETLLKLSALFEVKVAKSAVNPPESKTPIQRDDSVSGRLTVTERVLKHLHDNLFLTIFNSDAGLLYSLHDENQRWTPRTDLETGEVCRLEGNNPFSGTNNSGSSFMVIYAENELPRFWDKSGSFERVLKDGYSSNHGTFLDYYFHIYREEFPGVELENGQFPAGFFRVLVNHV…	A-1(L)	ATGGCTAGACAAAAAAAAGAATCCGGCGCTGACAACACCGGAAACCAAAAACAAAGAAAAGAACAGTCAATCGAAGTTGATACAATAATAAACAATCCTGAGAATTTTGTCAACTTTTTATTTTTACAACACGCTGTAGCGCTTGCCCCCGGAGTCACCAAAGACGGTTTGAGAAGTGCTTTCAAGATGAATCGGAACGATTGGAAGCGACGGAAAGGGCTGGAAAATTTTATCAGTGCTGTAGAGTCGGGTTACATCCATCAAGCTGAAGTTACGATTGACGGAGACAAACAGTACCATTTTGGTGTAATTGACTTTGATTTTTGGAACAAAGCGATCGCTGCACCGATTGACCACGCTATCAGCATTGAGCAAATTAAACAACTTCCCAGTGTTAAA…	P068	3066	NA	-1	48927	51992
A-1-L000075	49989	50252	-1	hypothetical protein	LLYSNIKVFEHLLNNRLDRKNIDYPDLCNLIEANFRIYLTGGECRRVIEKLKVVAKGSPTRNDLLKSVEIAYPRKYQEIINRNPMVV	A-1(L)	TTGCTTTACAGCAATATAAAAGTGTTTGAACATTTGTTAAATAATCGTTTGGACAGAAAAAACATTGATTATCCTGATCTTTGCAATCTTATTGAAGCTAATTTTAGAATATACCTGACCGGTGGGGAATGTAGGAGAGTGATTGAAAAATTAAAAGTGGTTGCCAAAGGTTCACCGACCAGAAACGATTTGTTAAAGTCGGTTGAAATCGCGTATCCAAGAAAATACCAAGAAATAATCAACCGTAATCCGATGGTTGTTTAA	P069	264	NA	-1	52226	52489
A-1-L000076	50389	51597	1	transposase	MLVFETKLEGTNEQYQLLDEAIKTARFVRNACLRYWMDNQNIGRYDLSAYCAVLAANENFPFVAKLNSMARQASAERAWSAIARFFDNCKQNKTGKKGYPRFKKEQTHGSVEYKTSGWKLSSDRRYVTFSDGFKAGTFKLWGTRDLHFYQLKQFKRVRVVRRADGYYAQFCIDQERVERREPTLKTIGLDVGLNHFLTDSEGNTVENPRHLRKSEKSLKRLQRRLSKTKKGSNNRVKARNRLSRKHLKVSRQRKDFAVKLARCVVQSSDLVAYEDLQVRNMVRNRHLAKSISDAAWTQFRQWVEYFGKVFGVVTVAVPPHHTSQNCSNCGEVVKKSLSTRTHACPHCGHIQDRDWNAARNILELGLRTVGHTGSQVSGDIDLCLGEVTPPNKSSRGKRK…	A-1(L)	ATGCTAGTATTTGAGACAAAACTTGAAGGAACAAACGAGCAGTATCAATTGCTGGATGAGGCGATTAAAACTGCTCGTTTTGTCCGCAATGCTTGCCTCCGGTACTGGATGGACAACCAAAACATCGGCAGGTATGATTTGAGTGCTTATTGCGCTGTCCTTGCTGCCAATGAAAACTTTCCGTTCGTTGCCAAACTCAACTCTATGGCTCGACAAGCTTCTGCTGAAAGAGCGTGGAGTGCAATTGCTCGGTTTTTTGACAATTGCAAGCAAAACAAAACCGGGAAGAAAGGTTATCCACGCTTTAAAAAAGAACAGACGCATGGGAGTGTTGAGTATAAAACTAGCGGCTGGAAGCTTAGTAGTGACCGTCGTTATGTCACTTTTAGCGACGGATTT…	P070	1209	NA	1	52626	53834
A-1-L000077	51618	51782	-1	hypothetical protein	MSALSNFSNKDFQSLTIWKDEKGREYYRAIDICSNLRHSNPTQALNRHLTSSPV	A-1(L)	ATGAGTGCTTTGAGCAATTTTTCAAATAAAGATTTTCAATCTCTCACTATTTGGAAAGACGAAAAAGGTAGGGAATATTATAGAGCCATCGATATTTGTTCAAATTTAAGACATAGCAATCCTACACAAGCTTTAAACCGTCATTTGACATCCTCCCCCGTTTAG	P103	165	NA	-1	53855	54019
A-1-L000078	51938	52171	1	hypothetical protein	VYGENYKNYQFFKCLKLLLHSFSTLSTLQNFYRYKVTKKCNACNAVTVRFTAIALQNYVVTSFKIHRNENSFLYLVY	A-1(L)	GTGTACGGAGAAAACTACAAAAATTACCAATTTTTTAAGTGCTTAAAGTTACTGTTACATTCTTTCAGTACACTTTCCACGTTACAAAATTTTTACCGTTACAAAGTTACGAAAAAATGTAACGCGTGTAACGCAGTCACAGTAAGGTTTACAGCGATCGCGTTACAAAATTACGTTGTTACGTCGTTCAAAATTCATAGAAACGAAAATTCATTTTTGTACTTAGTGTACTGA	P098	234	NA	1	54175	54408
A-1-L000079	52494	53132	1	thymidylate kinase	MNTRQEKPYAGTFIVFEGIDGAGKTTQANKAYEYLSGLKIPTILTCEPGGTQFGSNLRAWLKSDVQLTPRLQFLGMILDRLEHVNNVIRPQLLQGTVVLCDRFTWSTIAYQGALGLHRDIIDTMNRFATTDGCNVDPDLILLYDTELQIARERMKSDDRYEKMDDKFYTEVIKTYNQLGYYWDNCHVIDGGQTEDKVWETTKKWLDKILQLC	A-1(L)	ATGAACACCAGACAAGAAAAACCCTATGCAGGTACTTTCATCGTTTTTGAAGGGATAGACGGTGCTGGTAAGACCACACAGGCGAACAAAGCCTATGAGTATTTATCAGGGTTGAAAATTCCTACTATCCTCACCTGTGAACCGGGTGGAACACAATTCGGCTCCAATTTAAGAGCGTGGTTAAAAAGCGATGTGCAACTTACACCCCGATTGCAGTTTTTAGGAATGATACTTGACCGATTAGAACACGTTAATAATGTAATCCGTCCTCAGTTGTTACAAGGAACTGTTGTACTATGCGATCGCTTTACGTGGTCTACAATCGCTTATCAGGGTGCGTTGGGACTGCACCGGGACATCATCGACACTATGAATCGATTTGCAACAACTGACGGTTGT…	P071	639	NA	1	54731	55369
A-1-L000080	53369	53743	1	hypothetical protein	MKLSKVLLSTAIAFTTISAALPAIAQRPYIVSVPGKTNDGSTLKYDATSLDNYRGDAVKFTYYIIDTTSDLRQNRAITFCTNRNGWLVETINGGAFWVDATSNASNNMLNSVCNRVFPNWNVRR	A-1(L)	ATGAAATTATCGAAAGTTCTGTTAAGCACGGCAATTGCTTTTACAACGATATCCGCCGCATTGCCAGCGATCGCTCAAAGACCATACATCGTTTCTGTGCCAGGAAAAACTAACGATGGTTCGACACTGAAATATGACGCAACATCTTTAGATAATTATAGAGGGGATGCTGTAAAGTTCACATATTACATCATCGATACAACATCTGATTTACGACAAAACAGAGCAATAACTTTTTGCACTAATAGAAACGGATGGTTAGTAGAGACAATTAACGGTGGCGCTTTTTGGGTGGATGCAACGTCTAACGCTTCTAACAATATGCTTAACAGTGTTTGTAACCGTGTTTTTCCTAATTGGAATGTAAGACGATGA	P072	375	Signal peptide	1	55606	55980
A-1-L000081	53740	54156	1	hypothetical protein	MKKTARQIGIDKQRYGDRNNPEYVDLCYRTHKSCGDRCVICTKKSVEIHHAYYLGYKNDKPGVNVFAICRHCHTSQCHRYNTWLPDYDEPMKSRNTEEFITYLRQRFLFVSQAFNGIKGVMSYYGIPKNKRRNSKTKK	A-1(L)	ATGAAAAAAACTGCAAGACAGATAGGAATTGATAAACAGCGTTATGGTGATCGAAACAATCCTGAGTATGTGGATTTGTGTTATCGCACACATAAAAGCTGTGGTGATAGGTGTGTAATCTGTACAAAAAAAAGTGTAGAAATTCACCATGCCTATTATCTAGGTTACAAAAATGACAAACCCGGAGTCAATGTTTTTGCTATATGTCGTCATTGTCATACTTCACAGTGTCATAGGTATAATACTTGGTTGCCTGACTATGATGAACCAATGAAAAGCCGTAACACTGAGGAATTTATAACATATTTGCGTCAAAGATTTTTGTTTGTTAGTCAAGCGTTCAACGGTATAAAAGGGGTGATGAGTTACTATGGAATACCAAAAAACAAACGTAGAAAT…	P073	417	NA	1	55977	56393
A-1-L000082	54166	54525	1	hypothetical protein	MIINGVNYHEKYLNRLLQIGTFPQRFDKLLTKPVRYYVGLKKRPKAIAKLKFLITYPLPTDFLVCSKQFEFLVLRSTTKQKIEIVGHYENRLKRICQLIEKLELPLTKKEKQILKELQE	A-1(L)	ATGATAATCAACGGTGTAAACTATCACGAAAAATATCTCAATCGGTTGTTACAAATTGGTACGTTTCCGCAACGTTTTGATAAATTATTGACAAAACCTGTTCGGTATTATGTGGGGTTAAAAAAACGACCGAAAGCGATTGCTAAACTAAAGTTTTTGATCACTTATCCTTTGCCAACTGATTTTTTAGTCTGTTCTAAACAATTTGAATTTTTGGTACTTCGCAGTACCACAAAACAAAAAATAGAAATAGTTGGACATTATGAAAACAGATTAAAAAGAATTTGTCAACTGATTGAAAAATTAGAATTACCATTGACGAAAAAAGAAAAACAGATTTTGAAAGAATTACAAGAATGA	P074	360	NA	1	56403	56762
A-1-L000083	54522	55565	1	DNA-cytosine methyltransferase	MKPIAISLFTGVGGFDLGVERAGFNVVAANEIDVKTASTYSKNFKTPIIDDVRRLSGNVLRDSGGIGNRDVDLVFGGSPCQGFSQAGCRNESDSRNLLIFEYQRIVLDIYPKYFIFENVSELLNRRNESLLNRFISGFNAEGYRIALKVLDASNYGIPQSRKRVFMLGCRYDRNAPQYPPESEQRFTLHDAIADLKFANGYEKLKYVDRVPEFVYDEPSNYVKNYHKLLGSNIDFTKVIRPITASKFTRHDYQTIKDFSSYSQGYREKFGRRLKPIYNDVCPTVVTKQRLIHPIYPRYLTVRECARVQSFPDDFNFYTTIEQGQKEVGNAVPPLLGFQLAKEVLKVL	A-1(L)	ATGAAACCTATTGCTATTAGCTTGTTTACTGGTGTAGGTGGATTTGATCTTGGTGTAGAACGTGCGGGTTTTAACGTCGTTGCAGCAAATGAAATAGACGTTAAAACCGCTTCTACATACTCTAAAAACTTTAAAACGCCTATTATTGATGATGTCCGTAGATTGTCTGGAAACGTTCTACGTGACTCCGGGGGCATTGGGAATCGTGATGTTGATCTGGTTTTTGGCGGTTCACCTTGTCAAGGTTTCAGCCAAGCCGGATGCAGAAATGAGAGTGACTCTAGAAACTTGTTAATTTTTGAATATCAACGGATAGTGTTGGACATTTACCCAAAGTATTTCATTTTTGAAAACGTTTCAGAGTTGCTCAACAGACGTAATGAATCGCTGTTAAATCGC…	P075	1044	NA	1	56759	57802
A-1-L000084	55597	56010	1	hypothetical protein	MKNYTIFDVLQFLDFESGNIKYEELPEKIKNMRDEFWQTSILLNVWWKLRKLSPNMNNIDWFFSRFLGGHITIGRLTVFGCNAMMYMFCWHGKTGTWCFRPPCFNTHWEIWKWGCLYFSPNGTRGHEEAVIVWDDKY	A-1(L)	ATGAAGAACTACACAATTTTTGATGTTCTACAGTTTTTAGATTTTGAATCAGGTAATATTAAATATGAAGAATTGCCGGAAAAAATTAAAAATATGAGAGATGAGTTTTGGCAAACTTCCATACTGTTAAATGTTTGGTGGAAATTGAGAAAACTTTCACCAAATATGAATAACATTGATTGGTTTTTCAGTCGCTTTTTAGGTGGTCACATCACTATCGGACGCTTAACAGTGTTTGGATGCAATGCTATGATGTATATGTTTTGCTGGCATGGTAAAACAGGTACATGGTGTTTTAGACCACCATGTTTTAACACGCATTGGGAAATCTGGAAATGGGGGTGTTTATACTTTTCACCGAACGGTACACGCGGACACGAAGAAGCTGTTATAGTTTGG…	P076	414	NA	1	57834	58247
A-1-L000085	56010	56177	1	hypothetical protein	MENVCKIEFTYQQLKAVSKALHAAKNDQHIGLLPQGCTALKKIDTAIASNTNYLA	A-1(L)	ATGGAAAACGTTTGTAAGATTGAATTCACTTACCAGCAATTAAAAGCTGTTTCTAAAGCTTTACACGCTGCAAAAAATGATCAGCATATTGGGTTACTACCACAAGGTTGTACAGCGCTAAAAAAGATTGACACGGCGATCGCTAGTAATACCAATTACTTAGCGTGA	P077	168	NA	1	58247	58414
A-1-L000086	56209	56424	1	hypothetical protein	MNFEWLKTHFVKNWKTTLIGFVSAFAGFVAFAPEQFPKPLVMLAQYINAGGAIGLGIYAYDSKRKAIENRQ	A-1(L)	ATGAATTTTGAATGGTTAAAAACTCACTTTGTTAAAAACTGGAAAACCACGTTAATCGGTTTTGTTTCTGCTTTTGCTGGTTTTGTTGCTTTTGCTCCGGAACAATTCCCAAAACCTTTAGTAATGCTTGCACAATATATTAACGCAGGGGGTGCAATTGGTTTAGGTATTTACGCATATGACAGTAAAAGAAAAGCTATTGAAAACAGACAATAG	P078	216	2 TMP	1	58446	58661
A-1-L000087	56488	56898	-1	hypothetical protein	MLQECYSRTGWTSTNGEQKTTYRRVMAGLVDFIQEDFTFLEKMPENWEPLPTDLFIYELPGNQNFVDLIGYTRNTVTKIINGVRTYTTEYYRGLINRTVTQQFTVEYYEEMPEDWEPIPGTHLILWEDVTDPTVYE	A-1(L)	ATGTTACAAGAGTGTTATTCAAGAACAGGTTGGACTAGCACCAACGGAGAACAAAAAACAACTTACAGACGCGTCATGGCCGGTTTAGTTGATTTTATTCAAGAAGATTTTACATTTCTTGAAAAGATGCCAGAAAATTGGGAACCTTTACCAACAGACTTATTTATCTACGAACTACCAGGAAACCAAAATTTTGTAGATTTGATAGGATACACCAGAAACACTGTCACTAAAATAATAAACGGTGTAAGAACTTATACAACTGAATATTACAGAGGATTGATCAATCGAACTGTAACACAACAATTCACTGTAGAATACTATGAAGAGATGCCAGAAGATTGGGAACCAATACCAGGAACACATCTAATACTTTGGGAAGATGTAACAGATCCTACA…	P079	411	NA	-1	58725	59135
A-1-L000088	56912	57517	-1	hypothetical protein	MRELKLNDNGRISAEYAKNRLVGGLNRWYSFDNGMLDLIGNTTNNGGNIRYFPIVIPRPVLIDSATMNVSTALTGGTFRIGIYDNAVVDNKSVPNNRIIDMGEQPLTAGIKTFPISPFAINDGFYWVAVAPSGNTGFSGVVTKATGYKVLGTSTFVTNADLCLTETFTYASMVNGELPLIANPNAFDTRYMLTLFRVINFL	A-1(L)	ATGAGAGAATTAAAATTAAACGATAATGGTAGAATCTCAGCCGAATATGCAAAAAACAGATTGGTAGGAGGTTTAAATAGGTGGTATAGTTTTGATAATGGAATGCTGGATCTTATCGGAAACACAACCAACAATGGTGGAAATATAAGATATTTTCCAATAGTGATACCCAGACCGGTATTAATAGATAGCGCTACAATGAATGTTAGTACAGCACTGACAGGAGGAACGTTCAGAATAGGTATATATGATAATGCTGTTGTTGACAATAAAAGTGTTCCTAACAACCGTATTATAGACATGGGAGAACAACCTTTGACAGCAGGGATAAAAACATTTCCCATCTCTCCTTTTGCAATAAATGACGGTTTTTACTGGGTAGCGGTAGCACCTAGTGGA…	P080	606	Signal peptide	-1	59149	59754
A-1-L000089	57570	58076	-1	hypothetical protein	MSSNKFIGILNGIQTLFTAIASSSGVGDASKIIMTDSSGKIDSTLMPSGIGAATKSILASEALVAGDFVNIFNNAGTLNVRKADNSNNRPANGFVLSAFSSAANATVYLQGENTGRTGLTPGSIYFLGTAGGVTTTAPTASGTIIQQLGYSTGATSINFEYNDSISIA	A-1(L)	ATGTCTTCAAATAAGTTTATTGGTATTTTAAACGGTATTCAAACACTATTTACAGCAATTGCATCTTCTAGTGGTGTGGGCGACGCTTCTAAAATTATCATGACCGATAGCTCTGGAAAAATTGACTCTACTTTAATGCCTTCTGGTATCGGTGCAGCAACAAAAAGTATTTTAGCTTCTGAAGCGTTAGTAGCAGGCGACTTCGTAAATATCTTTAATAATGCCGGAACACTAAACGTTAGAAAAGCTGATAATAGCAACAATAGACCGGCTAACGGTTTTGTGTTATCTGCATTCTCCAGCGCTGCAAATGCCACAGTATATTTACAGGGTGAAAACACTGGACGCACTGGTTTGACTCCGGGGAGTATATATTTTCTAGGAACGGCCGGAGGAGTC…	P081	507	NA	-1	59807	60313
A-1-L000090	58089	58814	-1	hypothetical protein	MRRLKGTIRHLDDQPWINVSLFLTLINGTFNSANQYPIDTKHAKTDQNGEFVFNVVPNVGIDQSYYILTTPDNKKHSFTVPDGTSDIEFSVVREAGIIATDPEYTNVLNYLEDYIDDAIANIQASSVIAEIFTCGQTISALKALRFDSSTGKVFYASSSDATHLNKCVGVSSQSGVLNDNIQVVTSGYLSDQSWNWTIGSPIFFDSGGTLTHTPGSSYYQVIGIPVTTNKVLISVEQPIKL	A-1(L)	ATGAGGAGATTGAAAGGCACTATCAGACATTTAGATGATCAACCGTGGATCAATGTTTCACTATTTTTAACATTGATCAACGGTACTTTTAACAGTGCTAATCAATACCCGATAGACACCAAACACGCAAAAACTGATCAAAACGGCGAGTTTGTTTTCAATGTTGTTCCTAATGTTGGAATAGACCAAAGTTACTATATACTCACTACACCTGACAATAAAAAACATTCTTTTACCGTTCCGGATGGAACAAGCGATATAGAATTTAGCGTGGTTCGGGAAGCTGGCATCATAGCAACTGACCCCGAATACACAAACGTTTTAAATTATTTAGAAGATTATATTGATGATGCGATCGCAAACATACAAGCATCGTCGGTAATAGCAGAAATTTTTACC…	P082	726	NA	-1	60326	61051
A-1-L000091	58876	59178	1	hypothetical protein	MQNNPDLSKLLERIDERLEELEKPKQWSISDVIPLASLLITLIAGFTSTVFISVSKITTLEIRNQYLTENVLELKREVTEIKNRLTDYNDTKRQTNNKPM	A-1(L)	ATGCAAAACAATCCAGATTTGTCTAAATTGCTGGAACGCATAGATGAACGCTTGGAAGAATTAGAAAAACCTAAACAATGGAGTATATCGGATGTCATTCCTTTGGCATCTCTTTTAATCACTCTGATTGCTGGATTCACTTCTACAGTGTTTATAAGCGTTTCCAAAATTACAACGCTTGAAATTAGAAACCAGTATTTAACTGAAAATGTGCTAGAGTTAAAAAGAGAGGTAACAGAAATTAAAAACAGATTAACAGACTACAATGATACTAAACGACAAACGAATAATAAACCTATGTGA	P083	303	1 TMP	1	61113	61415
A-1-L000092	59189	59740	1	dCTP deaminase	MIQPYERSLIRFITEEDLKHSKIISYGLSSFGYDIRLSSKEFFTFRHVPGTIVDPKNFNVTNLTPGDLFHDENGSYFVIPANSYGLGVAIERLNLPRNITAVCVGKSTYARCGIIANITPAESGWSGHLTLEFSNSSSADCRIYANEGVVQLLFLEGQECETSYEDRNGKYQNQQETVVLSRV	A-1(L)	ATGATACAACCTTATGAGCGATCGCTCATAAGGTTTATTACTGAAGAAGATTTAAAACATTCAAAAATTATTAGTTACGGATTGTCTAGCTTCGGTTATGACATTAGATTGTCGTCAAAAGAGTTTTTTACTTTTCGCCATGTCCCTGGTACTATAGTAGATCCTAAAAACTTTAACGTTACAAATCTGACTCCGGGTGATTTGTTCCATGATGAAAACGGATCGTATTTTGTCATTCCAGCAAATAGTTATGGTTTGGGTGTAGCTATAGAACGCTTAAATTTGCCTAGAAACATTACTGCTGTTTGTGTTGGAAAATCGACTTATGCCCGTTGCGGAATTATAGCAAACATCACCCCCGCCGAGTCTGGATGGTCTGGACATCTTACTTTAGAGTTT…	P084	552	NA	1	61426	61977
A-1-L000093	59827	61125	1	hypothetical protein	LENRVILNESAKNNVKRKKMITFSDVKQISVESLQENFLSGLFAWCEPEVYVRGGVSQDDVDEKKLQLTFEDDGKKYVEVLEPLTFYKRDGVLYLLNGNNRVNALFQMINSSDTKDYDYRLVPYRVLESDPSLAVLEELQVVSNDTTSAHTPQQLAKRVAASSARLEAEYKAKDPKIKKNALSSKVLESLCTIYKRQHHYIRNLLRVAEQPEAVQQLLEAEKVSANTVVEISKKLPKDASAEYIEEAYGELAAIAGEGKITEKTLNEWLESKKPTPTNNSDNGNSNDDDDKNPPPTVTIEEFTTAAIDRFNKLSVIEKGRIVPALKPQVSTVVKTGLSLLAGTFDIFSDDESLELLEDVRALIFNRLGNIDHLVSRAETAGEEIPNIAKKFNSFNKAID…	A-1(L)	TTGGAAAACCGAGTTATATTAAATGAGTCGGCAAAAAACAATGTAAAGAGAAAAAAAATGATCACTTTTTCAGACGTAAAACAAATCTCAGTTGAATCATTACAAGAAAACTTTTTATCAGGTTTGTTTGCTTGGTGTGAACCTGAAGTTTATGTGCGTGGCGGAGTTTCACAAGACGATGTTGATGAGAAAAAACTTCAATTGACTTTTGAAGATGATGGTAAAAAGTACGTTGAAGTTTTAGAACCTTTAACTTTTTACAAACGTGATGGTGTTCTATATCTGTTAAACGGCAATAATCGCGTAAATGCTTTGTTCCAGATGATTAATTCTTCTGACACAAAAGATTATGATTATAGACTAGTACCTTACCGTGTTTTAGAATCTGATCCGTCTTTG…	P085	1299	NA	1	62064	63362
A-1-L000094	61264	61710	1	hypothetical protein	MKKTAKKYSLTSFKLWKNINGKWCFYNAIFDHSDKSSLSYMSACKLINRGWTPYPIAGKPGITSPLNLELVDTKPLDEYLKEKDPVSFVAGECIKEFLNKPVRKYTDVFTPESTNVADLALQKAIEDYKNGKYVLPHLLKKVLEHYAK	A-1(L)	ATGAAAAAAACTGCTAAAAAATACTCTTTAACTTCTTTCAAATTGTGGAAAAATATAAACGGTAAATGGTGTTTTTATAATGCCATTTTCGATCATTCTGATAAAAGTTCGTTATCCTATATGAGCGCTTGTAAATTGATAAATAGAGGATGGACACCTTACCCAATTGCCGGAAAACCTGGAATAACATCACCCTTAAATTTAGAGTTGGTTGACACAAAACCATTAGACGAATATCTAAAGGAAAAAGATCCTGTGTCGTTTGTCGCTGGTGAATGTATCAAAGAGTTTTTAAATAAACCTGTCAGAAAATATACAGATGTTTTCACCCCGGAGTCAACAAACGTTGCTGATTTGGCTCTACAAAAGGCAATAGAGGACTATAAAAACGGTAAGTAT…	P086	447	NA	1	63501	63947
A-1-L000095	61700	62587	1	DNA methylase	MLNKIHLGDCVQIMKSFPSAFIDLTVTSPPYDDLRNYYGFSFDLETLISELYRCTKIGGVVVWVVADQTINGGESGNSFRQALDFMKHGFKLNDTMIYKKLHPKPEVTGYRYQPAFEYMFVFAKGTPKTFNPLKEPCKNAGQSYTKSTKTLKDGSKVGYNSPYIRDTKIKSNIWEYSIGYMQSSKDTIAFEHPAIFPEQLAEDHILSWSDSGETVFDPFMGSGTVAKVAFQLGRSYIGCEISEEYLAIAEKRLSMLTPPESINVADLALQKAREDYKNGRYVLPHLLKKVLENDN	A-1(L)	ATGCTAAATAAAATACATCTTGGTGATTGTGTACAAATAATGAAAAGCTTTCCCAGCGCTTTTATAGATTTAACAGTGACTTCACCACCTTATGATGATTTACGAAACTATTACGGATTTTCTTTTGATTTGGAAACGCTAATAAGTGAGTTATATCGTTGTACAAAAATCGGGGGTGTGGTAGTCTGGGTAGTTGCTGATCAAACGATAAACGGTGGTGAAAGTGGGAACAGTTTCCGTCAAGCGCTTGATTTCATGAAACACGGTTTCAAGTTAAACGACACAATGATATATAAAAAACTTCATCCTAAACCTGAAGTCACAGGATATCGATATCAACCCGCTTTCGAGTATATGTTCGTGTTTGCCAAAGGAACGCCCAAAACCTTCAATCCTTTA…	P087	888	NA	1	63937	64824
A-1-L000096	62577	63008	1	RusA	MIIKYAFPFAAFPKPRGGIGRYGNMTHSSKGYRQWQQKFLESLSNYHSSEKSFPIDFHCLIFFFYIKPKRGQPPDLENLQGAIQDTLKKAGCITDDNYKILGRYYTDHMVVKDTSHFDLYLVSNHQEKIYVIDKLLPKIDTKI	A-1(L)	ATGATAATTAAGTATGCTTTTCCTTTTGCAGCTTTCCCCAAACCACGCGGGGGAATCGGTCGTTATGGAAACATGACTCATAGTTCCAAAGGTTACAGACAATGGCAACAAAAATTTTTAGAGTCACTCTCAAATTATCATAGTTCTGAAAAGTCGTTTCCCATTGATTTCCATTGTTTGATATTCTTTTTTTATATCAAACCTAAACGCGGTCAACCCCCGGATTTAGAAAATTTACAAGGTGCTATACAGGACACTTTAAAAAAAGCGGGATGTATAACTGATGACAATTACAAAATACTTGGCAGATATTACACAGATCATATGGTTGTGAAAGATACATCACATTTCGATCTGTATCTTGTCTCAAATCATCAAGAAAAGATTTACGTCATTGAT…	P088	432	NA	1	64814	65245
A-1-L000097	63058	63402	1	hypothetical protein	MINKERRLKVVYKTDKNGLIIVSPVVSSIDPEALEIAIKVLDGKINIDSLINNGVDVIDDGESYIEAPDRFWKACKEVKPIIKTTEDTFFHKNGVSIYERNMIIVKRKNEKTKS	A-1(L)	ATGATTAACAAAGAACGACGTTTAAAAGTTGTTTATAAAACTGATAAAAACGGTTTAATTATTGTTTCGCCTGTTGTGTCAAGCATCGACCCTGAAGCACTGGAAATCGCAATTAAAGTTCTTGATGGTAAAATAAATATAGATTCACTCATAAACAATGGTGTGGACGTTATAGACGATGGAGAAAGCTATATAGAAGCGCCTGATCGTTTTTGGAAAGCTTGTAAAGAAGTCAAACCGATTATTAAAACCACAGAAGACACGTTTTTTCATAAAAACGGTGTATCTATATACGAAAGAAACATGATAATAGTGAAAAGAAAAAATGAAAAAACAAAATCTTGA	P089	345	NA	1	65295	65639
A-1-L000098	63383	63553	1	hypothetical protein	MKKQNLDNVMYVCLPISTLCLLFLVCQIALMNPQTKRFYDGFWQGFWSNIGLRITP	A-1(L)	ATGAAAAAACAAAATCTTGACAATGTGATGTATGTTTGTTTACCAATCTCAACTTTGTGTTTATTATTTCTCGTCTGCCAAATAGCTTTGATGAATCCGCAGACTAAAAGGTTTTATGATGGTTTTTGGCAGGGTTTTTGGTCTAACATAGGATTAAGAATCACACCATAA	P104	171	1 TMP	1	65620	65790
A-1-L000099	63627	64406	-1	thymidylate synthase	MQVRLIARTTGVENTEYHGKTIDEIITGIARISSSREVNNLFEEPHKLLRHCIINGHWSVFTESNLIFEIVTSRAIGRELLRHWSIRPQEFSQRYAEITKFEEVEIRKQSKNNRQSSTEIFDPIIVSNERLDIQIKASDLINDVLELCENNYKLLLNAGVARESARYILPETTETRLIMNGTIREWITTLNQRLHQTAQKECRMIAEAIRDFLLVECPIISKALYNFEDAYDIHILDRVTLEKFGVYEMVKANNFKKIK	A-1(L)	ATGCAAGTAAGATTGATTGCACGGACTACTGGAGTAGAAAACACTGAATATCACGGCAAAACAATTGATGAAATTATCACAGGGATTGCCAGAATTAGCAGCAGTCGAGAAGTCAATAATCTCTTTGAAGAACCTCACAAACTGTTAAGACATTGCATCATTAACGGTCACTGGTCAGTTTTCACAGAATCAAATCTGATATTTGAAATTGTTACCAGTCGTGCGATCGGAAGAGAGTTGTTAAGACATTGGAGCATACGACCACAAGAATTTAGCCAACGGTATGCGGAGATAACAAAATTTGAAGAGGTTGAAATTAGAAAACAATCTAAAAATAATAGACAATCTTCCACAGAAATTTTTGACCCTATAATAGTTTCAAATGAGCGATTAGATATA…	P090	780	NA	-1	65864	66643
A-1-L000100	64450	64764	1	hypothetical protein	MEERQNYFIEVIGNGGVTMQILQVYTMFIGFIFDSIEAIKSDANNLPIALQSLENIIFDSGTIHPDLFVYLSNDKPKFEELLKSFVKPPESKKATAKTAIAKDE	A-1(L)	ATGGAAGAAAGACAAAATTACTTTATAGAAGTTATAGGGAACGGTGGTGTAACTATGCAAATTTTGCAAGTTTATACAATGTTTATTGGTTTTATTTTTGATTCGATAGAAGCGATTAAAAGTGATGCCAACAACTTACCAATCGCTTTACAATCGCTTGAAAATATAATTTTTGATTCTGGTACAATTCACCCAGATTTATTCGTTTATTTGTCAAACGATAAACCGAAATTTGAAGAACTGTTAAAAAGCTTTGTAAAACCCCCGGAGTCAAAAAAAGCGACCGCTAAAACAGCGATCGCCAAAGATGAATAA	P091	315	NA	1	66687	67001
A-1-L000101	64767	65408	-1	hypothetical protein	MSALVNLFNRYSYSTVDFCDKCRKFTGVRKDAYNLICRSCDSGGESLLEIKIEPNKVLEKIVKNTESVKAELLTTKKGGNRKLVKKDVLSYVNSLNEPISLKELASAFEVSPQAVRKFFRRDCTAWEFSAQYDPKKREHAIGKYDPDDNLLLIITGLWIIFPSRINIQGLHLLTKLDKKKIQKICQESEKIGKEKENGSWRYWLINAHNLYLK	A-1(L)	ATGTCAGCACTAGTAAACTTGTTCAATAGATACAGTTATTCAACTGTGGATTTTTGCGATAAATGTAGAAAGTTCACCGGAGTCAGAAAAGACGCTTATAATCTTATATGCCGTAGCTGTGACTCCGGGGGAGAATCGCTATTAGAAATTAAAATAGAACCGAACAAAGTTTTGGAAAAGATAGTCAAAAACACTGAATCGGTAAAAGCGGAATTGTTGACTACCAAAAAAGGAGGCAACCGTAAGCTGGTCAAAAAAGACGTTTTAAGCTATGTAAATTCTTTGAACGAACCGATATCATTAAAAGAACTGGCAAGCGCTTTTGAAGTCTCTCCGCAAGCTGTTAGAAAGTTTTTTAGGCGCGACTGCACAGCTTGGGAATTTAGCGCGCAATACGAC…	P092	642	NA	-1	67004	67645
A-1-L000102	65413	65613	-1	hypothetical protein	MEVWESIKNYLENGTDLKELLTQIEDDENIIYVLYGMLKYIDDNAFLEDHQEYLMNYLEHQYNLQY	A-1(L)	ATGGAAGTTTGGGAAAGTATTAAAAATTACTTAGAAAACGGAACAGATTTAAAAGAGTTGTTGACACAGATTGAAGATGATGAAAATATCATATATGTGTTGTACGGAATGTTAAAATATATCGATGACAACGCATTTTTAGAAGATCATCAAGAATACTTGATGAACTATTTAGAACATCAATACAATTTACAATACTAA	P093	201	NA	-1	67650	67850
A-1-L000103	65647	66030	1	hypothetical protein	MYYNAFQQIIVKNKLKTILGLIRLINVDSLCYHDLVLLNKFILKSLFIFRLTPLKKTVIKLILESLYKTVESLIDKKIDSCYIEFSKKLDKLIFILKMISLKLYDSDLNLVEMDKNKITINDRYKHY	A-1(L)	ATGTATTATAATGCTTTTCAACAAATTATAGTTAAAAATAAATTAAAAACTATCTTAGGGTTGATAAGACTGATCAATGTTGATAGTCTTTGTTATCACGATTTAGTTTTGTTAAACAAATTTATATTAAAATCGTTGTTTATCTTTCGATTGACTCCGTTGAAAAAAACAGTCATAAAATTAATTTTAGAGTCACTCTATAAAACTGTGGAATCTTTGATAGACAAAAAAATAGATTCATGTTACATAGAGTTTTCTAAAAAACTTGACAAATTGATATTTATTTTAAAAATGATAAGTTTGAAATTATATGACAGTGATTTAAATTTAGTGGAAATGGATAAAAATAAGATAACGATAAATGATAGATACAAACACTATTGA	P094	384	NA	1	1	384
A-1-L000104	66008	66496	1	hypothetical protein	MIDTNTIDIIKEVLEKSGDINAACIAASITRHTFEKWLQIYPTFKDIVKEAKEFYKNCLISDWDIDAIAYTNKLLKGEIVTRSVVRRFVLPKPDLEDDETFTPESSELVELYREEREQTVQPPKWLLERYLPKENVEPIKVQINFADMPNVEEDDPEAKEVE	A-1(L)	ATGATAGATACAAACACTATTGATATTATAAAAGAGGTGTTAGAAAAAAGTGGCGATATTAACGCCGCTTGTATTGCAGCGTCTATAACTCGCCACACATTTGAAAAGTGGTTGCAAATTTATCCAACTTTCAAAGATATTGTCAAAGAAGCTAAAGAATTTTATAAAAATTGTTTAATATCTGATTGGGACATCGACGCGATCGCATACACTAACAAGCTACTTAAAGGTGAAATAGTGACTCGTTCGGTTGTCCGTAGGTTTGTACTACCAAAACCGGATTTAGAAGATGATGAAACTTTCACACCGGAGTCATCAGAATTAGTTGAATTGTACCGTGAAGAACGAGAACAAACGGTACAACCGCCAAAATGGTTGTTAGAAAGATATCTACCTAAA…	P095	489	NA	1	362	850
A-1-L000105	66496	67854	1	large subunit terminase	MSSFPIVDSYHPKQGNIVARGIAGTQNSILVCGRGFGKSIAGRGIIYTTAIDYRGMIPPQGKTKLFNVIAMPHLNQAKKIHWPPLEYLFTETELSRLVKNINRSEGTIELIGSLPGIALSGLNDDNGNKIRGWSIPRLVIDEMQDVKPGIWASIKPAVDRCLGRVFVSGTPKGKGTHFHRFCKEMTAQGWKYYHYFTEDNPFLPDIDRVLAEARQALTEREFNAEYRASWEDFPGQIFDQLQPYHVLPPDSFPNNFDSIVMGIDWGDIHPAIAIVGIRDFPYKYYLIDYWQGNSDGTSNSISMDLFVETCGKYCEKYNVHSTYPDVFQPGNINNIYEFRNSEWSGMRNIVDPDSGDYQRMRTLKVMPSLSMMNRLFSKNRLFIHKGIEDQFRTIVRKQD…	A-1(L)	ATGTCAAGTTTCCCTATAGTTGATTCATATCACCCAAAGCAAGGAAACATCGTAGCTCGTGGCATCGCTGGCACTCAGAACAGTATTTTGGTGTGCGGCCGTGGTTTTGGAAAATCAATTGCTGGTAGAGGAATAATCTACACCACTGCGATAGATTATCGTGGCATGATACCCCCGCAAGGCAAAACAAAGCTATTCAACGTAATAGCGATGCCACATCTAAATCAAGCTAAAAAAATCCATTGGCCGCCGCTTGAATATCTTTTCACAGAAACAGAATTATCAAGATTAGTAAAAAATATCAATCGAAGTGAAGGCACTATTGAGTTAATTGGTTCACTTCCGGGTATAGCGTTGTCTGGACTAAATGACGATAACGGAAACAAGATAAGAGGGTGG…	P001	1359	NA	1	850	2208
A-Alj1000001	1	1551	1	hypothetical protein	MKSYLPVAKEIEKVAQGGHHLNPEDFLLIRDEESPGVTKKRIEKFAPENYLGAAIRLQRILQKSGVLEIKSESLPGDVIVWENFFNKVDKRNSSLKDFVIDVFTEALINKYCYVQIELNRLDFDTVTEAEADNILANRKPYYFKIPLQSIMVEKCDGDTIEWIKYKRLDKVDDPFGKTIYNMTYVLIDNTHITTWTYYDIILSDSGEISKIWDQRLNYGKGAYRYIDKEKDKADPVSFAHNRGSCPVVRYRMDDSLYMADQVYLAQRMIYGLSMNLFHTAANAGFVQKWIRPYIAGNDTRISKESGGASYIPLPKEALNEIIKKYAESLGDESIIMADFFTFEELAGTSVEMQIGLIERLRNYIFTAILFNNAKFEQSTSDTQSGAAKEIDFYVQNLAL…	A-Alj1	ATGAAAAGCTACTTACCAGTAGCTAAAGAAATAGAGAAAGTTGCTCAAGGTGGACATCACTTAAATCCTGAAGATTTTTTATTGATTCGGGATGAAGAATCCCCCGGAGTCACTAAAAAGCGTATAGAAAAATTCGCGCCAGAAAACTATTTAGGCGCTGCGATTCGGTTGCAAAGGATTTTACAAAAATCCGGAGTATTGGAAATAAAATCCGAATCGTTGCCCGGAGATGTAATAGTCTGGGAAAATTTTTTTAATAAAGTTGACAAACGTAATTCATCGTTGAAAGACTTTGTTATTGATGTTTTCACAGAAGCGCTGATAAACAAATATTGTTATGTGCAAATCGAATTAAATCGTTTAGATTTTGATACTGTTACAGAAGCAGAAGCCGATAAT…	P002	1551	NA	1	2280	3830
A-Alj1000002	1735	2433	1	outer membrane protein	MSDNKEGLTDDQTNQDAPENAGAENIDAKLEARFKAFEDKINQALNGVVKKVEKRLTTDKPPESKKPSDSSESDSKKPELDTIQALKSEMEKSRKELEEQLEAERQERAKDKRQVFLSSVDSKISTAIASQKFDDPEAALTVFKSMYGLDNWHPGSSGYVIYKTSEEDEGKTLESLVKDWAKSPVGKRFFNKNLPNGTGLDTPDKTNQTSSKAKTLFEKRKEAKESGFNIKM	A-Alj1	ATGAGCGATAACAAAGAAGGTTTAACAGACGATCAGACCAATCAGGATGCACCGGAAAACGCTGGTGCTGAGAACATCGACGCTAAATTAGAAGCTAGATTTAAAGCTTTTGAAGACAAGATAAATCAAGCGCTTAACGGTGTGGTCAAGAAAGTTGAAAAGCGATTAACAACCGACAAACCCCCGGAGTCAAAAAAACCTTCTGACAGTTCTGAGAGTGACTCTAAAAAACCCGAACTCGATACCATTCAGGCTTTAAAATCTGAAATGGAAAAAAGCCGGAAAGAGTTAGAAGAACAATTAGAAGCTGAAAGACAGGAAAGAGCAAAAGACAAGCGCCAAGTATTTTTGTCAAGCGTTGACAGCAAAATCAGTACGGCGATCGCTTCACAGAAATTT…	P003	699	NA	1	4014	4712
A-Alj1000003	2440	3537	1	Chain A, Putative major capsid protein	MPLTNLTPTELLANKAVDYLANSFLVETPMLGLLANRVVNQKQKAIEWGAKVAQGVVGGRTRTGALANDTQGTLKGAALSVPDYYIKHQFDVGKDEIVNSDATGKISAVRDPVATAISDAFDVLAKKINSVLYTASGVADTTNFGIFGLDAAAGTTVANSATGTYAGISKVTFPRWRSIIQGGAVAGTNEALTINRMTAMLRARRTAGVSYKGNQNQRLIIVTTDQIENDVLRPLYGTVVDNQNVDFTRLDKDLLPYVNYMVKGIPVISDIDCPSNKMYLLNLDKLAIYSFDQSDADQSDGKITYIPLRYVDETGDAPSESTLWVRLANVSDEHPDVLKFELSVALQLVAFDLIDSISVIRDITQ	A-Alj1	ATGCCTTTAACGAATTTAACGCCTACCGAACTATTAGCAAATAAAGCTGTTGATTATTTAGCAAATAGCTTTTTAGTTGAAACGCCTATGTTAGGTTTGTTAGCTAACAGGGTAGTTAATCAGAAACAAAAAGCTATTGAATGGGGAGCCAAAGTTGCTCAAGGTGTAGTAGGTGGACGTACCAGAACGGGAGCGCTTGCCAATGACACACAAGGAACTTTAAAAGGTGCTGCTCTATCCGTTCCTGATTATTACATCAAACATCAGTTTGATGTTGGTAAAGATGAGATCGTCAACTCTGATGCTACTGGTAAAATCTCAGCAGTACGTGATCCCGTTGCGACCGCTATCAGTGACGCTTTTGATGTATTAGCTAAAAAGATCAACAGCGTTTTATAT…	P004	1098	NA	1	4719	5816
A-Alj1000004	3682	4161	1	hypothetical protein	VTPGETVTHPLETYYNQFLDGLPISELEEMEIEFIAMCIGFPRSQNNFVNALLDLTTMEIYTIRLSVKEILRLDKLNKESIENRQVTKVEEITMNMNYTGDIKDELVTEVKKLARLLRLPVLDNLYVSYDDVEGQIGANGLLQPLNRSFGGYLTGYTVR	A-Alj1	GTGACTCCGGGGGAAACTGTGACTCATCCGTTAGAAACATATTACAACCAGTTTTTAGACGGTTTGCCTATTTCCGAACTTGAAGAAATGGAAATAGAATTTATTGCTATGTGTATCGGTTTCCCCCGGAGTCAAAACAATTTTGTAAACGCGTTGTTAGACTTGACAACGATGGAAATTTATACTATACGTTTATCGGTTAAAGAAATTTTGCGACTTGATAAACTCAATAAAGAATCTATCGAAAATCGTCAAGTGACCAAAGTTGAAGAAATCACAATGAATATGAATTATACGGGTGATATCAAAGATGAACTGGTAACAGAAGTAAAAAAACTTGCCAGACTGTTAAGATTGCCTGTTTTGGACAATCTTTATGTTAGCTATGATGATGTCGAA…	P005	480	NA	1	5961	6440
A-Alj1000005	4158	4481	1	hypothetical protein	MIIKSGYLFNDFDTRQVLQNAVDDATAIGVDIVGSRTPVRTGNLLSRWDSEDYLDFDAVSSSIFNDTHYAHFVEVGTSRFSGRFYLLRSLSEIEENFIETVIDKLGD	A-Alj1	ATGATCATTAAATCCGGTTACTTATTTAATGATTTTGATACCCGTCAAGTGTTACAAAACGCTGTTGATGATGCAACAGCAATCGGTGTGGACATCGTAGGATCACGTACTCCTGTTAGAACCGGAAACCTGTTGAGTCGTTGGGACAGTGAAGATTATTTAGATTTTGATGCGGTATCATCAAGCATTTTTAATGATACACATTATGCACATTTTGTAGAAGTAGGTACATCACGTTTTAGCGGTCGTTTTTATTTGTTGCGATCGCTTTCGGAAATTGAAGAGAATTTTATAGAAACTGTCATAGATAAATTAGGTGATTAA	P006	324	NA	1	6437	6760
A-Alj1000006	4481	4879	1	hypothetical protein	MLYSNLINVKQKVISIREKLGDPRLKTLVFEYPVGQLFRVTPKLKVSMVPKNMIGLPLDSKANIMISADDYYVKDVSRNVPEGALRTRVWLDPVINDSGEIISGINCRCHVISDKSGLSWDLILRKEREVRI	A-Alj1	ATGCTTTACTCTAATTTGATAAACGTTAAACAAAAAGTAATATCTATTAGAGAAAAGCTCGGTGATCCGCGTTTAAAAACTCTTGTTTTTGAATATCCTGTCGGTCAACTTTTTAGAGTCACTCCAAAATTGAAAGTGTCGATGGTTCCCAAAAACATGATAGGTTTGCCGTTAGACAGCAAAGCTAACATAATGATCAGTGCAGATGATTACTATGTAAAAGATGTCAGTCGTAATGTGCCAGAGGGAGCGCTTAGAACACGCGTCTGGTTAGATCCGGTAATAAATGACTCCGGGGAGATCATATCCGGTATTAACTGCCGTTGCCATGTAATCAGCGATAAATCCGGTTTATCGTGGGATTTGATTTTGCGTAAGGAAAGAGAGGTAAGAATATGA	P007	399	NA	1	6760	7158
A-Alj1000007	4876	5592	1	hypothetical protein	MTKPSLIRQSLLQHINSVVWLQTRGIQEPLKPDVVVNNVAYPPNIVVEKPMNNIEVGFKSQQINDTGDVRQFICECVFDYSLVWVFSRETYKTYHQIPRSQIEDLIVFCQQFVMTSRVDEDITNITVKPSQIIVKPTEDVNSDVSNSSSWSVIANLLFIVEFLSSLDEFSPIDFNKIQPPTWELLDDLDPIVPEQPFTLNGVIISLNKSELPSVRTDEPDTYQLEEIIYIPPSIEEQI	A-Alj1	ATGACAAAGCCCTCTTTAATACGGCAAAGTCTTTTACAACATATTAACAGTGTTGTTTGGTTGCAAACACGGGGAATACAAGAACCTTTAAAACCTGATGTTGTTGTCAACAATGTTGCTTATCCTCCTAACATTGTTGTAGAAAAACCGATGAACAACATTGAAGTCGGTTTTAAATCACAGCAAATAAACGATACAGGCGACGTAAGACAATTTATTTGTGAATGCGTTTTTGATTACTCTTTGGTATGGGTATTTAGCAGAGAAACATATAAAACTTATCATCAAATCCCCCGGAGTCAAATTGAAGATTTGATAGTTTTTTGTCAACAATTTGTTATGACTTCCAGAGTCGATGAAGACATTACAAACATTACCGTAAAACCTTCACAAATAATT…	P008	717	NA	1	7155	7871
A-Alj1000008	5617	7137	1	tail sheath protein	MTNFLNGVNIGTPGAYAFYQTTQSRPINVEPFRTCYMVGFASNGANKNVPTRVSSLVDFNNVFVNSESAKSVDLFFKNSQSFGNLYFINVAIPTRFQIVVNAATSGSYSVTINGVTKNLTVTGGATTQTIAADVISAINTDTVLNKEVLAAVGGTSSTVVITSKKPTNTTTAAVTGVIFTLTTTTGTVPTAADYVYTINNTFDPALEAGFIIAPEAFSTFNKNDRLSVQVAMENLASAYRYQWAALIDSGAMSEISNTDRAIAEAATYNSVQGHCSYYYPYLINLEDQQVPPSAAVAGIALYRYVIDGFAEPPAGVNFPLKGVKNVAYKVTWEEQNVANPEGVNCILNKENYGIVIWGARTLSADPNIVFISTRVILNIIINTLNRGYDFDIFNAVGGA…	A-Alj1	ATGACTAACTTTTTAAACGGCGTAAATATTGGAACACCCGGAGCTTACGCGTTTTACCAAACCACGCAAAGCAGGCCGATAAATGTTGAACCTTTCCGTACTTGTTACATGGTGGGTTTTGCTTCTAACGGTGCTAATAAAAATGTGCCTACTCGCGTTAGCAGTTTGGTAGATTTTAACAATGTTTTTGTGAACTCTGAAAGCGCGAAAAGCGTCGATCTGTTCTTCAAAAACTCTCAAAGCTTTGGTAATCTGTATTTTATCAATGTTGCAATCCCTACACGTTTTCAAATTGTTGTAAATGCTGCCACGTCTGGTAGTTACTCTGTCACAATAAACGGTGTGACAAAGAATTTAACCGTCACAGGAGGAGCCACAACACAAACAATTGCGGCTGAT…	P009	1521	NA	1	7896	9416
A-Alj1000009	7196	7702	1	tail tube protein	MAVSKRPFSINGFAVNLTIGQFIDARYWSKCTKIEKMYNSGEYSDGQSNIIFDLPGAIKYSEVTLSKALSPGDEELINKLIAVNSDPIAYVSVFIQPVYRDGYYTVPQGGKIVLEFCTVSRVTPINEIDTMGSNPAMFELAVKPSRIRSDGGNINWWVEPSFELASGQ	A-Alj1	ATGGCAGTTTCTAAAAGACCGTTTTCTATTAACGGGTTTGCTGTGAATTTGACAATCGGACAATTCATTGATGCCCGTTATTGGTCGAAGTGTACCAAAATAGAAAAGATGTATAACAGTGGTGAATACAGCGACGGACAGAGCAATATTATATTTGATCTTCCCGGTGCTATCAAATACTCTGAAGTGACTTTATCTAAAGCGCTTTCACCCGGAGATGAAGAACTGATAAACAAATTGATTGCTGTTAACAGCGATCCTATTGCTTACGTGTCTGTTTTTATTCAACCTGTTTACCGTGATGGATATTATACAGTACCTCAAGGTGGTAAAATAGTATTAGAGTTTTGCACAGTTTCAAGAGTTACACCTATTAATGAAATTGACACTATGGGTAGT…	P010	507	NA	1	9475	9981
A-Alj1000010	7718	8158	1	hypothetical protein	MKIQKIEEPINFIMPDDVPEDAIQEQKSVSKDKSDVSESTGVIVDEVVTPSGKDAIAFNSPVTGLRVVVLVPDTLEILAIEREIVKKHRESGAFEQSIVFLSHLIVEYGDQKGHRLFSFEKLLKFSRKELTVINMIATEFFRLGEI	A-Alj1	ATGAAAATTCAAAAAATAGAAGAACCTATCAATTTTATCATGCCTGATGATGTTCCTGAAGATGCTATACAGGAACAAAAATCAGTTTCAAAAGATAAAAGCGATGTGTCAGAATCCACGGGTGTGATAGTTGATGAAGTTGTTACACCAAGCGGTAAAGACGCGATCGCTTTTAATTCTCCGGTGACAGGTTTACGAGTAGTTGTACTAGTGCCTGACACACTGGAAATTTTGGCAATCGAAAGAGAGATTGTTAAAAAACATCGTGAAAGCGGTGCGTTTGAACAATCTATAGTGTTTCTATCTCATTTGATTGTTGAATACGGCGATCAAAAAGGTCATAGACTTTTTAGCTTTGAAAAGTTATTAAAATTTAGCCGAAAGGAGTTAACGGTTATT…	P011	441	NA	1	9997	10437
A-Alj1000011	8148	8360	1	hypothetical protein	VRFDFDENILYYAGYEFDEKQIKKAILSACGGNFTETYFKMLEIPVIKLFEMLNLFVEYQQEQEKLIKSK	A-Alj1	GTGAGATTTGATTTTGATGAAAACATTTTGTATTATGCTGGATATGAATTTGACGAAAAACAGATCAAAAAAGCGATTTTAAGCGCTTGCGGGGGCAATTTCACAGAGACATATTTTAAAATGTTGGAAATTCCCGTAATAAAGCTTTTTGAAATGTTAAACTTGTTTGTTGAATACCAGCAAGAACAAGAAAAACTTATCAAATCGAAATAG	P011	213	NA	1	10427	10639
A-Alj1000012	8430	10499	1	tail protein	MANRQHVISVDLRLLTGNFDSSLNYIQGRLNGVFGVVSDNATNSFFGNGGFLSSYLWNQAFNAIQTAGMAAFRAIGNEVKRSIAFQNDLISMATSYKGLLSLSTKEAFGLARQSNIIFQQRNVGLPTFGNFGTQLRSQYGDDFLGAFYDQNNVKASLERTADMIGRTTVLLGSISGVTNYQRTSFLSNFLSDDFKKLSRLEVFRNSPQLQRAFTQQTDAIGGEQGFNALTRKDRLLLLENIAAIAVDDDIIKAYKNSLGGVLSRLGQELFGDIGIFSFTRDLIFGLPNTSILSSITFFMKEIFAPDGVFGLIKPALQGIVDTVLIGTKFILDRTSFIFMGLNALAKVLQPIAPLIYATSSALTVLAAVGLANTIKSAIQGYLISSGAAMLGGKMGAAAM…	A-Alj1	ATGGCTAATAGACAGCACGTTATTTCAGTAGATTTAAGATTGCTTACAGGAAACTTTGACTCATCTTTAAATTATATTCAAGGACGTTTAAACGGCGTTTTTGGTGTGGTGTCAGATAACGCTACTAACAGCTTTTTTGGTAATGGCGGTTTCTTATCCTCTTATCTATGGAACCAAGCTTTTAACGCCATACAAACGGCAGGTATGGCAGCTTTTCGGGCAATTGGAAATGAGGTAAAGCGTTCTATAGCTTTTCAAAATGATTTAATAAGCATGGCAACATCCTATAAAGGATTGTTGAGTCTATCAACCAAGGAAGCTTTTGGACTGGCTAGACAGTCTAACATCATTTTTCAACAGCGTAACGTCGGATTGCCCACTTTCGGCAATTTTGGTACG…	P013	2070	NA	1	10709	12778
A-Alj1000013	10492	10617	1	hypothetical protein	MRKSDIIGWTLIIILSIYFLSVSWYEQNKNDSGGDQYERIK	A-Alj1	ATGCGTAAAAGCGATATCATAGGATGGACATTGATTATAATTTTGTCTATTTACTTTTTATCGGTTTCATGGTATGAACAAAATAAAAATGACTCCGGGGGTGATCAGTATGAACGTATAAAATAA	P096	126	Signal peptide	1	12771	12896
A-Alj1000014	11171	11518	1	hypothetical protein	MYLTAPATTRIAQSRQIRSFLVGEYGEYYQAWIDSLELQLDQMDKKIQKEMEDADPETPVTYSTVRNRETGEEVTIHITKKNTIYIHFDIDANQTTTKQPVTTMENAREYAKTLL	A-Alj1	ATGTACTTGACAGCACCAGCAACCACTCGGATCGCTCAATCCCGTCAAATTCGCTCTTTTCTGGTTGGTGAGTACGGCGAATATTACCAAGCATGGATCGATTCGCTAGAACTGCAACTAGACCAAATGGACAAAAAAATCCAAAAAGAAATGGAAGACGCTGATCCGGAAACACCAGTTACTTACAGCACTGTAAGAAATCGTGAAACAGGTGAAGAGGTTACAATTCACATCACCAAGAAAAACACGATTTATATACATTTCGATATCGACGCTAACCAAACAACTACAAAACAACCTGTAACCACAATGGAAAACGCCAGAGAATACGCTAAAACACTTTTATAG	P014	348	NA	1	13450	13797
A-Alj1000015	11603	14302	-1	valine-glycine repeat protein G1	MQDPIIKVLIGNDTFLLGQDIIDLDFQIGEGKKQNNINFTIFDKDGFYADKYISTSYAQGGIDLPIDFLENPDDAKDTNSASSATEIDSGGNGTVSRGGVFTPKIRAFLDTIASKETAPGTALNIDGYRSVSGSSTLFDESEMVSGGFPRSQGSKNIGRYQFTVIDYNHARSKYPSINNYSPQNQDLLAYFKLQHRNVLPYLLRDDLDNAIDKASYEWASFPGIGKPQGQFNQVQSGTTIASLKSYYESRLAYYRSLEAGSDFQASAPKDTTNNQYQGKEYKTIRTLSNSTTASFYGYNDGFDSSDLTANGERFNPEGITAAHESLPFGTLVKVTWAVNNKSVVVRINDRGAFVRLGRQIDLSYGAAKALSSPGNDAIAAGLLTVKLEVVELRTPIGDN…	A-Alj1	ATGCAAGATCCGATAATCAAAGTTTTAATAGGCAATGACACATTTTTACTTGGTCAAGACATAATTGATCTTGATTTTCAGATCGGTGAAGGGAAAAAACAGAATAATATCAACTTTACAATATTTGACAAAGACGGATTTTATGCTGACAAATACATAAGTACCAGCTATGCCCAAGGTGGGATCGATTTGCCGATTGACTTCCTAGAAAATCCCGATGACGCAAAAGACACTAACAGCGCATCGTCAGCAACGGAAATTGATTCCGGGGGAAATGGCACGGTAAGCCGTGGGGGAGTCTTCACGCCTAAAATTCGGGCATTTCTGGACACGATTGCAAGTAAAGAGACAGCACCGGGAACCGCTTTAAATATTGATGGTTATAGAAGTGTTTCAGGT…	P015	2700	NA	-1	13882	16581
A-Alj1000016	14335	14802	-1	hypothetical protein	MTTQEFVSKNKTIESELLDLLIKPNTDDSILTRNRQAIADRDLFDIEWEPGQSLNKLATEYLGNSFAWQIIADANGIDPTKEIDIGAGLKVPDQKSLENSIKKYIVNSPQGKQLISDAKQSILNLIGVGDSNTEFSKTLKDCIGKVVNFSFDNTQ	A-Alj1	ATGACTACACAAGAATTTGTAAGTAAAAACAAAACTATCGAATCTGAATTACTTGATCTTTTGATCAAGCCAAATACAGATGATAGCATATTGACAAGAAACCGTCAAGCGATCGCTGATCGTGATTTGTTCGATATTGAATGGGAACCGGGACAAAGTTTAAATAAATTGGCAACCGAATATCTAGGTAACAGTTTTGCATGGCAGATCATCGCTGATGCGAACGGCATAGACCCGACAAAAGAAATTGATATAGGTGCAGGTTTAAAAGTGCCTGACCAAAAAAGTTTAGAAAATTCTATCAAGAAATATATCGTAAATTCACCGCAAGGAAAGCAACTTATCAGCGATGCCAAGCAATCTATTTTAAATTTAATTGGTGTAGGCGATTCTAACACA…	P016	468	NA	-1	16614	17081
A-Alj1000017	14801	15082	1	hypothetical protein	MEKSELFERIYNSHDTAKQMITENDYEFTWVGREFYIKVDGYEKIYFKLELYDPETDQYYATKRSDNPSMFVTSWIDARILRALVIDKHAFIV	A-Alj1	ATGGAAAAATCAGAATTGTTTGAAAGAATTTACAACAGCCATGATACGGCGAAACAAATGATAACGGAAAATGATTATGAGTTTACATGGGTAGGACGTGAATTTTACATAAAAGTTGACGGATATGAAAAGATATACTTTAAATTGGAATTGTACGATCCTGAAACAGATCAATATTATGCTACTAAACGAAGTGACAATCCCTCAATGTTTGTTACTTCATGGATCGATGCCAGAATATTACGTGCTTTGGTAATAGATAAACACGCTTTTATTGTCTAG	P017	282	NA	1	17080	17361
A-Alj1000018	15072	15920	-1	hypothetical protein	MSRFLKNRAVINGLPEIKNPGKYQHCYLIEYTDKNNVKQSATENKNKQKQGFPVYLFMMNPENISYTLPINYQEIAIPFTSKNHVNYSNGGNIVMSMSNLILDTMDEKKSLQPLIDRLIALREPTVKTGLKSHPKILAFKWGSNTFAPCVLTNISFDITRWVDGYPTKARMSMTLKEVQAPSSDSKALAEAKKKVKVETVQNGNLKKGLTEKQLIDGSKVATEYLKKNISFQPRSIQNILSDPKSVIKIDKDTGQVSLFNGAGEFAALVGTYNGDIFTPTRQ	A-Alj1	ATGTCCAGATTTTTAAAAAATCGTGCTGTTATCAATGGATTGCCAGAGATCAAAAATCCCGGTAAGTATCAACATTGTTATTTAATAGAATATACGGATAAAAATAATGTAAAACAATCGGCAACGGAAAACAAAAATAAACAAAAACAGGGCTTTCCGGTGTACTTATTCATGATGAATCCGGAGAACATCAGTTACACATTACCAATAAATTATCAAGAAATTGCCATCCCTTTTACGTCTAAAAATCATGTGAATTACTCTAACGGCGGTAACATCGTTATGAGTATGTCAAATCTGATACTTGATACGATGGATGAGAAAAAGTCTTTACAACCGCTTATAGATCGTTTAATCGCTTTGCGGGAACCAACAGTTAAAACAGGTTTAAAATCTCAT…	P018	849	NA	-1	17351	18199
A-Alj1000019	16212	16352	1	hypothetical protein	VYATVVELTDYQPSKIGNFKPPRSIKLDNPGVLLLGSSGINFLESL	A-Alj1	GTGTACGCTACTGTGGTAGAATTAACCGATTACCAACCTAGCAAAATCGGCAATTTCAAACCCCCGCGATCTATTAAATTAGACAATCCGGGGGTTTTATTGTTGGGATCGTCGGGGATCAATTTTTTAGAGTCACTCTAA	P105	141	NA	1	18491	18631
A-Alj1000020	16429	16731	1	hypothetical protein	MIIDVKVKTVKKPVVKINLNNLNEIIGIYDDPEKASKHAKRMYEKHGYKKELITCKWETIENIKNSLEKQIEIGLEYQKKFNSREGEQEIKMMRDFIKNY	A-Alj1	ATGATCATAGATGTTAAAGTAAAAACCGTTAAAAAACCTGTTGTAAAAATAAATCTAAACAATTTAAATGAAATCATAGGTATTTACGATGATCCTGAAAAAGCATCCAAACACGCAAAAAGAATGTATGAAAAACACGGATACAAAAAAGAGTTGATTACTTGTAAATGGGAAACAATAGAAAACATTAAAAATTCATTGGAAAAACAAATAGAAATAGGTTTAGAATACCAGAAAAAATTTAATAGTAGAGAAGGAGAGCAAGAAATAAAAATGATGAGAGATTTTATAAAAAACTATTGA	P106	303	NA	1	18708	19010
A-Alj1000021	16979	17176	1	hypothetical protein	MKHAQVLIILIVAVMVVTTTIYNGFAPYIKKAIAYGKERYYYRKLAAKNRKEFWQAMTRKNFMGA	A-Alj1	ATGAAACACGCTCAAGTACTTATCATTCTAATTGTCGCTGTTATGGTCGTTACAACCACTATTTACAACGGCTTCGCGCCATACATCAAGAAAGCGATCGCGTACGGTAAAGAGCGTTATTATTACCGTAAATTAGCGGCAAAAAATAGAAAAGAGTTTTGGCAAGCTATGACACGTAAAAACTTTATGGGGGCATGA	P019	198	1 TMP; Signal peptide	1	19258	19455
A-Alj1000022	17176	17328	1	hypothetical protein	MHIGNTKTVTFPVTKKDFNRLKLLAKSQNISVSQLVEKWVKDKTDETHTT	A-Alj1	ATGCACATAGGCAACACAAAAACCGTTACTTTCCCAGTAACCAAAAAAGATTTTAATAGACTAAAGTTACTGGCAAAGTCTCAAAATATTTCAGTTTCTCAATTAGTAGAAAAATGGGTGAAAGACAAAACAGATGAAACCCACACCACGTAA	P107	153	NA	1	19455	19607
A-Alj1000023	17309	17485	1	hypothetical protein	MKPTPRNIQRIRKALSEHQMALNSVESGYTATFNGYVILSGSTLQEISDQLNLYNMGK	A-Alj1	ATGAAACCCACACCACGTAACATTCAACGGATACGCAAAGCATTATCAGAACATCAAATGGCACTGAACAGCGTTGAAAGTGGTTATACAGCCACTTTTAACGGATACGTTATTTTAAGCGGTTCCACGTTGCAAGAAATCAGTGATCAACTCAATTTATACAACATGGGAAAATGA	P020	177	NA	1	19588	19764
A-Alj1000024	17482	17616	1	hypothetical protein	MINRYTLTFFFVACFLIGLLAGQVTNEVPKVWSDFDVMLQQENE	A-Alj1	ATGATAAACCGTTACACACTTACTTTCTTTTTTGTCGCTTGTTTTTTGATCGGTCTGCTGGCCGGTCAAGTCACTAACGAAGTGCCAAAAGTTTGGTCAGATTTTGACGTGATGTTACAACAGGAAAACGAATAG	P097	135	Signal peptide	1	19761	19895
A-Alj1000025	17719	17979	1	hypothetical protein	MTKRYKATQHINGVSPVTNVKRNKSLEPAKMYKISQMDAYKIMQQNFLNDSGEYYTMLDCIRRWRSEEEKGSESFNSFLDLLQALR	A-Alj1	ATGACTAAACGTTATAAAGCAACACAACACATAAACGGTGTTTCGCCTGTCACAAATGTTAAAAGAAATAAAAGTTTAGAACCTGCAAAAATGTATAAAATTTCTCAAATGGACGCATATAAAATAATGCAACAAAACTTTTTAAATGATTCAGGTGAGTATTACACGATGTTAGATTGTATAAGACGTTGGAGATCAGAAGAGGAGAAAGGATCAGAAAGTTTTAACAGCTTTTTAGATTTACTACAAGCGTTAAGATAA	P108	261	NA	1	19998	20258
A-Alj1000026	18108	18998	-1	exonuclease RNAse T and DNA polymerase	MITNIKTYNEAIATLADLSISGSCVFLDTETIGGFAVPVMVELAVTDLQKRQLFNSYIQPWYMPDHIELKNNCDWEEIIVADTFEQHYDAIKSALADRDILIYNKSFDIRVIREVCEFYAVPLPFDLERVYCLMSLRSAIVGEKLPLEGKHTAYDDVCVMVDLFKELCKHEPIDAIGGDNLAEIIIKYDQVCAEIKQLESLKSEYAAFIKSKLLSDVATGDKTSVEIAHNKKLIKLSGRVDAIAKVDDPSLVPEKYFKSTFDRFAAAKDFKDSGEIAPGVTYERSEILGKIVISDK	A-Alj1	ATGATAACCAACATCAAAACATACAACGAAGCGATCGCAACTTTGGCGGATCTGTCAATATCTGGGAGTTGTGTTTTTTTGGACACGGAAACCATAGGCGGTTTTGCCGTTCCTGTGATGGTTGAATTAGCTGTTACAGATTTACAGAAACGTCAATTGTTTAACAGCTATATCCAACCGTGGTATATGCCCGATCACATCGAGTTAAAAAATAACTGTGATTGGGAAGAGATCATCGTTGCTGACACGTTTGAACAACATTACGACGCGATTAAAAGCGCTTTAGCAGATCGTGACATTTTGATATACAATAAATCTTTTGATATCCGAGTGATTCGGGAAGTATGTGAATTTTACGCCGTACCGCTACCATTTGACCTTGAACGTGTGTATTGTCTG…	P022	891	NA	-1	20387	21277
A-Alj1000027	19090	19416	-1	hypothetical protein	MNTIQILESWLKAEKEIDYLKDVIEEIKRSKMTNDLEEEYKKVLAHNRELRSELASHKKAIEEWCSNYYQLQVEKDYLTQTIDKKNEQCEHLLKLNKELTERLAKFQS	A-Alj1	ATGAACACTATACAAATACTTGAATCTTGGTTAAAGGCCGAAAAAGAAATAGATTATTTGAAAGACGTTATCGAAGAGATTAAACGATCAAAAATGACTAACGATTTAGAGGAGGAATATAAAAAAGTTTTGGCACATAATAGAGAATTACGATCAGAATTAGCATCACATAAAAAAGCTATTGAGGAGTGGTGTTCCAATTATTACCAGTTACAAGTAGAAAAAGACTATCTGACGCAAACCATCGATAAAAAAAATGAACAATGTGAACATCTTTTAAAATTAAATAAAGAACTCACAGAAAGACTTGCGAAATTTCAATCGTAA	P109	327	NA	-1	21369	21695
A-Alj1000028	19529	19933	1	hypothetical protein	MNELPPKIDLSYCLSDFQLEILNDICNGLRVRQMAEKHYKSIGSINHAIQSIYAKLDCNNYIGLFKILYGFSPAPDRLEINPQANGIGEIIRLHIKGLKASQISQRTGNSRNYIYNVINSYKAIKKLESDIGEN	A-Alj1	ATGAACGAATTGCCCCCAAAAATCGATTTAAGCTATTGTTTGTCTGATTTCCAGTTAGAGATACTTAACGACATTTGCAACGGTCTGAGAGTAAGGCAGATGGCTGAAAAGCACTATAAATCTATTGGATCGATCAATCATGCCATACAGTCCATTTATGCAAAATTGGACTGCAATAATTACATCGGTTTATTCAAAATATTGTATGGTTTCTCTCCTGCACCAGATAGGCTTGAAATTAACCCACAAGCCAACGGTATCGGTGAAATAATACGATTGCATATAAAAGGTCTGAAAGCTTCTCAAATCAGCCAGCGAACGGGAAACAGCCGGAATTATATATACAACGTGATCAACAGTTACAAAGCCATAAAAAAACTTGAAAGTGATATCGGTGAA…	P024	405	NA	1	21808	22212
A-Alj1000029	20610	20957	1	MAG: antirepressor protein KilAC domain protein	MLLETKKELPDIIRLFPGLEEREYFQHTETKEFWFHASNVCKVLGFTNTSSALSLHCDEDEKLQKILNGKATWFVSESGIYGLAMGAKTEKAKEFKRWLKHDVLLRSLIQKNTKK	A-Alj1	ATGCTTCTTGAAACCAAAAAAGAACTACCGGATATAATTAGACTTTTTCCGGGTTTGGAAGAAAGAGAATATTTTCAACACACTGAAACCAAAGAGTTTTGGTTTCACGCTTCCAATGTATGCAAAGTATTAGGTTTTACTAATACTAGCAGCGCTTTATCTTTACATTGTGATGAAGATGAAAAGTTACAAAAAATTTTAAACGGTAAAGCGACATGGTTTGTTTCAGAATCAGGAATATATGGTTTAGCAATGGGAGCTAAAACGGAAAAAGCTAAAGAATTTAAAAGATGGTTAAAACATGATGTACTACTAAGATCGCTTATCCAAAAAAATACCAAGAAATAA	P069	348	NA	-1	52887	53234
A-Alj1000030	21208	24261	1	DNA primase	MSRQKKESGADNTGKQKNEQSIEVDIIINNSENFVNFLYLQHAVKLAPGVTKDGLRSAFKMNRNDWKRRKGLENFIESVQSGYIHQAEVTINGEKQYHFGVIDFDFWNKAIAAPIEHTISIEQIKELPSVKKYFYAIQKSISYRENAQNCHGYVVFDQPIQSKEEFQKCLKALVEIVKQDIAKLLGLEYNTKLELGVDGCTANNPSQVTFASLEPVTVMDAIASVETLLKLSALFEIKVSRSSSVAPESLPDGKNDSVSGRLTVTERVLKHIHDNLFLTVFNGDAGLLYSLHDENQRWTPRTDLEVGEVCRLEGNNPFSGTNNSGSSFMVIYSENELPRFWDKSGSFERLLKDGYSSNHGTFLDYYFHIYREEFPGVELENGQFPSGFFRVLVNHVCDH…	A-Alj1	ATGAGCAGACAAAAAAAAGAATCCGGCGCTGACAACACCGGAAAACAAAAAAACGAACAGTCAATCGAAGTTGATATAATAATAAACAATTCTGAAAATTTTGTCAACTTTTTATATTTACAACACGCTGTAAAGCTTGCCCCCGGAGTCACAAAAGATGGTTTGCGTTCGGCGTTTAAGATGAACCGCAACGATTGGAAACGCCGGAAAGGATTGGAAAACTTTATAGAGTCTGTACAGTCGGGATATATTCACCAAGCGGAAGTTACGATCAACGGTGAGAAACAGTATCATTTCGGCGTAATAGATTTTGATTTTTGGAACAAAGCGATCGCTGCACCGATTGAACATACGATCAGCATTGAACAAATTAAAGAATTACCCAGTGTTAAAAAGTAT…	P068	3054	NA	-1	49583	52636
A-Alj1000031	24285	24689	1	hypothetical protein	MGKGIGLSGYRGVRKHYTLWKSVLPDETILGLYSTPLEAAIVRERFLHEHRDEFKEVERYLNGVDLTPGVTINTYRKPKKVKPQKHQPRYGKYVYRNRHHNSFFVRIGKYQSKCFPFHSYAIAHRDEYLQNNLK	A-Alj1	ATGGGTAAAGGTATCGGACTATCAGGTTATAGAGGCGTAAGGAAGCATTACACCTTATGGAAATCTGTTTTACCAGATGAAACCATATTGGGTTTGTATTCAACACCATTAGAAGCGGCCATAGTCAGAGAACGTTTTTTACATGAACATCGTGATGAATTTAAAGAAGTTGAGAGATATTTAAACGGAGTTGATCTCACCCCCGGAGTCACGATTAATACTTACAGAAAACCTAAAAAAGTCAAACCTCAAAAGCATCAACCGCGTTACGGCAAGTATGTTTATCGTAACCGACATCATAATAGTTTTTTTGTAAGGATTGGGAAATATCAATCAAAATGCTTCCCTTTTCATTCTTATGCAATTGCTCACAGAGATGAATATTTGCAAAACAATTTA…	P067	405	NA	-1	49155	49559
A-Alj1000032	24724	25287	1	hypothetical protein	MTDKYLYYSTGSIKKINPHWVSEQLAAEGYTMLSTYESINKFFKILCPNGHHNKISFNNWNQGKRCSKCSHNNVYRNDGAKSFFAKYGYTIIGGDYKNNRTPMKYVCGKGHINTVTLSALKHYGSTCPYCKGTRTSIEDVRKFLSDRGCELLRPLIEFKHEYKVVYKNPNGEIKQKYWRTIKTTKKL	A-Alj1	ATGACTGACAAATATTTATATTATTCGACAGGATCGATCAAAAAAATCAATCCTCACTGGGTATCCGAACAGTTAGCGGCCGAAGGTTATACAATGCTTTCAACTTATGAAAGCATTAATAAATTTTTTAAAATTCTTTGTCCGAATGGACATCACAACAAAATAAGTTTTAACAATTGGAATCAGGGAAAACGTTGTTCAAAGTGTTCCCACAACAATGTTTATAGGAACGATGGGGCAAAATCTTTTTTTGCAAAATACGGTTATACGATAATCGGAGGAGATTATAAAAATAACCGTACTCCGATGAAATATGTATGTGGGAAAGGACATATCAATACTGTCACTCTTTCAGCTTTGAAACATTACGGATCGACTTGTCCGTACTGTAAAGGAACA…	P066	564	NA	-1	48557	49120
A-Alj1000033	25284	25631	1	hypothetical protein	MSEPMDTIAIRDDIINRFEKTLEDFPHVRKRLIKNYFEQCYRHEENARILKVIVTVEKNVMDFQVYSTVVKEYVDFLPGLEDIMNHSLLNNRVPILISFFPNENYELAFPVSIEV	A-Alj1	ATGAGTGAACCGATGGACACGATTGCAATACGTGACGATATTATTAATCGATTTGAAAAAACTTTAGAAGATTTTCCTCATGTTAGAAAACGATTGATAAAAAATTATTTTGAACAATGTTATCGGCATGAAGAAAACGCAAGAATACTAAAAGTAATTGTCACCGTTGAAAAAAACGTGATGGATTTTCAAGTTTACTCGACCGTAGTAAAAGAATACGTCGATTTTTTACCGGGACTAGAAGATATTATGAATCATTCGTTGTTGAACAACCGTGTTCCAATACTGATCAGCTTTTTCCCGAATGAGAATTATGAGTTAGCTTTTCCTGTAAGTATAGAGGTTTAA	P065	348	NA	-1	48213	48560
A-Alj1000034	25642	25878	1	ASCH domain protein	MRHELKTVNPWFTDVIEGRKDFEVRKNDRGYSVGDLLVLREWTGNNYTARKVEKVVKYVLRGEDFPEGVKPGYVVLGF	A-Alj1	ATGAGACACGAATTAAAAACGGTAAATCCTTGGTTTACTGACGTGATTGAAGGACGTAAAGATTTTGAAGTAAGGAAAAATGATAGGGGTTATTCGGTAGGCGATCTGTTAGTATTACGGGAGTGGACAGGAAACAACTACACAGCGAGAAAAGTCGAGAAAGTTGTAAAATATGTTTTACGTGGTGAAGACTTCCCAGAAGGTGTAAAACCTGGATACGTTGTGTTAGGTTTCTGA	P064	237	NA	-1	47966	48202
A-Alj1000035	26011	26442	1	hypothetical protein	MKIDVEDFRKIVDEWNCDLVVNKNHTRSHKYFVIDRKTTEILVSTSVLEDAQRRFTTVCDRWKKKYIDSARLTDIKDGGFSYSGNVVINGKDVTIYYNLFSDEWYCLEIPRRFTSFMSAYKYALDMFDKSTTEENMNSIKQTA	A-Alj1	ATGAAAATCGACGTTGAAGACTTTAGAAAAATTGTTGATGAGTGGAACTGCGATTTAGTTGTCAATAAAAACCATACTAGAAGTCACAAATATTTTGTGATAGATCGTAAAACCACAGAAATACTTGTCAGCACTTCCGTACTTGAAGACGCTCAAAGACGGTTTACAACCGTGTGCGATCGCTGGAAAAAGAAATACATAGATTCAGCACGTTTGACAGATATTAAAGATGGGGGATTTAGTTATAGTGGAAACGTTGTAATAAACGGTAAAGATGTTACCATCTATTACAATTTGTTTAGTGATGAATGGTACTGTTTAGAGATTCCCCGTCGCTTTACATCGTTTATGAGTGCTTATAAATATGCTTTGGATATGTTCGATAAATCGACAACAGAA…	P063	432	NA	-1	47402	47833
A-Alj1000036	26462	26680	1	hypothetical protein	MVSTYFAIYIDDQNIADYDYQIVNSCIQLNIGDKIEIKTKKLTMRVEVFEIENIIDIWEVDSFERCYKCKPV	A-Alj1	ATGGTTTCAACGTATTTTGCTATTTACATAGATGATCAAAATATCGCAGATTATGATTATCAAATTGTAAATTCTTGCATACAGTTAAATATTGGAGATAAAATCGAAATAAAAACTAAAAAATTAACAATGCGTGTTGAAGTGTTTGAAATTGAAAACATAATAGATATTTGGGAAGTAGATTCTTTTGAAAGATGCTACAAGTGTAAACCTGTGTAA	P110	219	NA	-1	47164	47382
A-Alj1000037	26794	27330	1	hypothetical protein	MKTTFIFNDVQVNLTDAFKKRIRLFAQMVYKLDYCPTIRQLEKLFGLKLVKPRGIGANLRQYHLNWMTAYKTIETDLEVSEENQYQFATRMDVELKAAIAKYNLSGSGKLTSSTEYRFDVYSRNAKGLLVCIGYFHSDFLNKKLAISFTSNGKRQAIVNVGQACHKMIGVFQKQPVGV	A-Alj1	ATGAAAACCACATTTATTTTTAACGATGTTCAAGTAAATTTGACGGACGCTTTCAAAAAAAGAATCAGATTATTTGCACAAATGGTTTACAAATTAGATTACTGTCCGACAATTAGACAACTTGAAAAATTGTTCGGTCTGAAATTGGTTAAACCGCGTGGGATCGGTGCTAATTTGCGCCAATACCATTTAAATTGGATGACAGCTTATAAAACGATTGAAACCGATTTAGAAGTGTCTGAAGAAAACCAATATCAATTTGCCACACGTATGGATGTTGAATTAAAAGCGGCTATCGCTAAATATAATTTGTCTGGTAGCGGTAAACTTACCAGTAGCACCGAATATCGTTTTGACGTTTATAGCAGAAATGCTAAAGGTTTGCTGGTTTGTATAGGA…	P062	537	NA	-1	46514	47050
A-Alj1000038	27332	27568	1	hypothetical protein	MKNIKDLPSVNNEYSIELISGCLYNAVIDSKFNVTIKLRFYSLTITETKSLVYLFFDEKEEGYFLNTNEIKQYKLKLI	A-Alj1	ATGAAAAACATTAAAGATTTGCCATCAGTGAATAATGAGTACTCTATAGAACTCATTAGCGGTTGTTTGTACAACGCAGTAATTGACAGTAAATTCAACGTGACCATCAAGCTTAGATTCTATTCTTTGACCATCACAGAAACCAAAAGTTTGGTGTATCTTTTCTTCGATGAAAAAGAGGAGGGATATTTTTTAAATACGAATGAGATCAAACAATACAAACTAAAGTTGATTTAG	P060	237	NA	-1	46276	46512
A-Alj1000039	27729	28607	1	hypothetical protein	MTRLTVKSVTEYAQAKGYELEVRNGTKDKYHIRVAGECPETTMFSATYRTLNEIMLCINEGYLLDGQSEPVEFDLQNYTDGYFFEGEATIDIYENSCLQSTEKLFVIHQFEESYLNDSGELPTFQEVATAIAPYGYELHRNNGQFFTESKAPYVYFKDGESEYALHVTYFLDRIVESVEENYYFKINNQRFQQISSELSKIGDHSGENLTGNETLSDRLSMLEKRLINAVEQRRANVRQICSEIGQMVRNWSSGQGFGNTVKRVTRKVARHAKRFYTILTERVSPKGHVGIF	A-Alj1	ATGACACGCTTAACAGTCAAATCGGTTACAGAATACGCTCAAGCTAAAGGATACGAATTAGAAGTAAGAAACGGTACAAAAGATAAATATCATATTCGTGTTGCTGGTGAGTGTCCAGAGACAACAATGTTTTCAGCTACTTACAGAACGCTTAATGAGATCATGCTTTGCATCAACGAAGGTTATTTACTCGACGGTCAAAGCGAACCAGTAGAATTTGATCTTCAGAATTATACTGACGGTTACTTTTTTGAAGGTGAGGCAACTATTGACATTTATGAAAATAGCTGCTTGCAATCCACTGAAAAGCTTTTTGTCATCCATCAGTTTGAAGAAAGTTATCTCAATGACTCCGGGGAACTACCAACATTTCAAGAAGTCGCAACGGCGATCGCTCCT…	P059	879	NA	-1	45237	46115
A-Alj1000040	28662	28871	1	hypothetical protein	MNLITDTEYTVTVNAELDLTLTFKFVSVEIDEKEICFVFERDGKTYKFVENQVRQLLNLPKNPITRRGF	A-Alj1	ATGAATTTGATCACCGATACAGAATACACGGTTACGGTAAATGCTGAACTGGACTTAACTTTAACTTTCAAGTTTGTGTCAGTGGAAATAGACGAAAAAGAAATATGTTTTGTTTTTGAAAGAGACGGAAAAACATACAAATTTGTCGAAAACCAAGTAAGACAGTTGTTGAATTTGCCAAAAAATCCAATAACTAGAAGAGGTTTTTAA	P111	210	NA	-1	44973	45182
A-Alj1000041	28935	29318	1	hypothetical protein	MNTVEKLYILADAIKNETDKIQKRGMSDDAAIALLGAKIQDDQNYIIEMLSERLNDRLSVVKNVLKRITLTLKYVQLIENLKKEWAVLVDQAGNIALDKNFKSTNPDETFDTAMRKICISHIEKEGF	A-Alj1	ATGAACACTGTAGAAAAGCTTTACATATTAGCCGATGCTATAAAGAACGAAACGGACAAAATACAAAAACGTGGAATGTCGGACGATGCGGCGATCGCGTTGTTAGGAGCGAAAATACAAGACGATCAAAATTACATCATAGAAATGTTGAGCGAAAGATTAAATGATCGTTTATCGGTCGTTAAAAATGTTTTGAAGCGGATCACGTTGACCTTAAAATATGTTCAATTGATTGAGAATCTAAAAAAAGAATGGGCAGTTTTAGTCGATCAAGCTGGTAATATAGCGCTGGACAAAAACTTTAAATCTACCAACCCAGACGAAACATTCGATACAGCAATGAGAAAGATTTGCATAAGTCATATTGAAAAAGAAGGTTTTTAA	P112	384	NA	-1	44526	44909
A-Alj1000042	29357	29974	1	DNA N-6-adenine-methyltransferase	MVSHHGSCLKNEHYTPRAIFDYIHCVSGEIDLDVASDEIGNRAARAKKYFTKDDDGYTKNWEGNIVFCNPPGRTKDTMHLPGQSEWFLKMVNQHRAGNFVEGWFIGYSIELLCKVGYNAFDYCLCVPQPGKLTGNTHMVSGMGRIMFDAYDPETDERVRQKSPMHGNVIIYLPPMNHKFSNVQIVKFLNVFKKLGAVHISTDYQK	A-Alj1	ATGGTTTCACATCACGGATCATGTCTCAAAAATGAACATTACACACCACGAGCTATTTTTGATTATATACACTGTGTAAGTGGTGAAATAGATTTAGACGTGGCAAGCGATGAAATAGGCAACAGAGCGGCCAGAGCTAAAAAGTATTTTACGAAAGATGATGACGGATATACAAAAAACTGGGAAGGTAATATTGTATTCTGCAATCCGCCGGGAAGAACTAAAGACACGATGCACTTACCAGGACAATCCGAGTGGTTTTTAAAAATGGTTAATCAACATCGTGCCGGGAATTTTGTTGAAGGATGGTTTATCGGTTACAGTATTGAATTGTTGTGTAAAGTTGGTTACAACGCTTTTGATTATTGTTTATGTGTTCCACAACCAGGAAAATTGACA…	P057	618	NA	-1	43870	44487
A-Alj1000043	29985	30323	1	hypothetical protein	LSTAFGYNVFASSYPYFSNVFTSRFPYLGIYKMIDFLLDVLKVLFIIYMVVFVTTFVMIESIFVIIGDDFDLTPEQRKYAKRWDNHRKHWEAFKIACKWPKILINAMMDGEL	A-Alj1	TTGTCTACTGCTTTTGGTTATAATGTTTTTGCTTCATCCTACCCTTATTTCAGCAACGTTTTTACTAGTCGGTTTCCTTATCTGGGTATTTACAAAATGATTGATTTTCTTTTGGATGTTTTAAAAGTGCTTTTCATCATTTATATGGTGGTTTTTGTAACAACATTTGTTATGATTGAATCGATTTTCGTGATTATTGGCGATGATTTCGATTTGACCCCAGAACAGCGAAAATATGCTAAACGATGGGACAATCATAGAAAGCACTGGGAAGCGTTTAAAATCGCTTGCAAGTGGCCTAAAATACTAATAAATGCGATGATGGATGGTGAATTATGA	P056	339	1 TMP	-1	43521	43859
A-Alj1000044	30320	30574	1	hypothetical protein	MIQFLINAFLFYVTVAFLIFLVYTYFEFQNSFPLFTFYIYPKMREDFKEMIREMNRDYDLQKRSIIFFWPLYLTLFAFFGIANR	A-Alj1	ATGATTCAATTTCTGATAAACGCTTTTTTGTTTTACGTGACTGTTGCTTTTTTGATATTTCTTGTGTACACATACTTTGAATTTCAGAACAGTTTTCCTCTTTTCACCTTTTACATTTATCCAAAAATGAGAGAAGATTTTAAAGAGATGATACGAGAAATGAATAGAGACTATGATCTACAAAAAAGAAGCATAATCTTTTTCTGGCCTTTATATTTGACTCTATTTGCATTTTTTGGAATAGCAAATAGATAG	P055	255	2 TMP	-1	43270	43524
A-Alj1000045	30741	30908	1	hypothetical protein	MEDLSKEIKALKDSIMSLEKELSEKKQKLSELKNQQKIYITELVQELPQVIYDPE	A-Alj1	ATGGAAGATTTATCCAAAGAAATAAAAGCATTAAAAGATAGCATTATGTCTCTTGAAAAAGAGTTGTCAGAGAAAAAACAAAAATTATCAGAGTTGAAAAACCAACAGAAAATTTACATCACTGAATTAGTACAAGAATTGCCCCAAGTAATTTATGATCCAGAATAA	P113	168	NA	-1	42936	43103
A-Alj1000046	31333	31848	1	hypothetical protein	MTITFRNKHAKNPRADKKVTPMRERIENWINNNQSMFNGEPKLQLHQIKRIESELLANYGDVSNITDEVLENYFKLKLYFPRTPYVKILIDKAIKLTKQLDEDKDDMIDAETLYSTITKISEFADSTIYAWFKRLNANFCTIGVYHTNTVVMVVYLALVKDAKDSKKLPMV	A-Alj1	ATGACTATCACATTCAGAAACAAACACGCCAAAAACCCCCGTGCGGATAAAAAAGTTACGCCGATGCGGGAAAGGATTGAAAATTGGATCAACAACAATCAGTCCATGTTTAACGGTGAACCAAAATTACAGTTGCATCAAATCAAAAGGATTGAAAGCGAATTATTAGCCAATTACGGCGATGTATCAAATATTACCGATGAAGTGTTAGAAAACTATTTCAAATTGAAATTGTATTTTCCCCGTACACCATACGTTAAAATTTTGATCGATAAAGCTATAAAACTCACTAAACAGCTAGATGAAGACAAAGACGATATGATCGATGCTGAAACACTGTACAGTACCATCACAAAAATTTCAGAATTTGCCGATTCAACTATATACGCATGGTTCAAA…	P051	516	NA	-1	41996	42511
A-Alj1000047	31983	32564	1	hypothetical protein	MKNSNVPLIRTRLHRKGVTGLSADEIKTALDNNNDDIDATVSELFSKHQTAIATTESDSGVSPESEEDFKSLLKINNNDDETVAMIKSEAGSMGLTIPVNHINDIATSVKQSRTYQSDKLKAIKSALIAYIDWQHEQSSNEAVETIKEVKEHATNKAVEFNNKMVGELSEFFRQSEQNSAEFADELIKALSVG	A-Alj1	ATGAAAAACTCAAACGTTCCTTTAATTCGTACCAGACTGCACCGTAAAGGTGTAACAGGATTGTCGGCGGACGAGATTAAAACAGCTTTAGATAACAACAATGATGACATTGACGCTACAGTGTCAGAATTGTTTTCCAAGCATCAGACAGCGATCGCAACTACCGAAAGTGACTCCGGTGTTTCCCCGGAGTCAGAAGAGGATTTTAAATCGTTGTTAAAAATTAACAATAACGATGATGAAACCGTTGCAATGATTAAATCAGAAGCGGGATCGATGGGTCTAACTATCCCCGTCAATCACATCAATGATATTGCAACTTCTGTCAAACAGTCTCGTACATACCAAAGCGACAAATTAAAAGCGATTAAAAGCGCTTTAATAGCTTACATAGATTGG…	P050	582	NA	-1	41280	41861
A-Alj1000048	32557	32748	1	hypothetical protein	LVEKNIKKDRDNAIAILCYTVITVMIFYTIGIIVYGGQRTGTDKNTNGYERIFEDRGENLPSI	A-Alj1	TTGGTTGAAAAAAATATCAAAAAAGATCGTGATAACGCGATCGCTATTCTTTGTTACACGGTTATCACGGTCATGATTTTTTATACAATAGGGATTATCGTTTATGGAGGACAAAGAACAGGAACAGATAAAAATACAAATGGATACGAAAGGATTTTTGAAGATAGAGGGGAGAATCTCCCCTCAATCTAA	P114	192	1 TMP	-1	41096	41287
A-Alj1000049	32768	32950	1	hypothetical protein	MQQAEYYRLKASQETKSVDEQTTVIVVSFMLLLTFMILSVSNKIGNSFKQQNTTEIIYVR	A-Alj1	ATGCAACAGGCTGAATATTACAGATTAAAAGCCAGCCAAGAAACAAAAAGCGTTGATGAACAAACAACGGTAATAGTAGTTTCGTTCATGCTTTTACTCACTTTTATGATTTTGTCTGTAAGTAACAAAATTGGTAACAGTTTCAAACAACAAAACACCACGGAGATCATTTATGTTCGGTGA	P049	183	1 TMP	-1	40894	41076
A-Alj1000050	32940	33392	1	hypothetical protein	MFGDNHSYNGSNTNGSAIIKSGYDVAALAGDTEKLKPTFQNALNIGSLKDANEKGIYQAAKDAGTLRGLGVMFKNYSREKLNTAKAALSLRNAALNHQKQAAGLELQWQQGSARHLQGMSETLMQLGIVQENHAGFTTYCDTADRLLKGL	A-Alj1	ATGTTCGGTGACAATCATTCTTACAACGGATCAAACACAAACGGTTCGGCAATTATCAAATCCGGTTATGATGTTGCCGCGCTTGCAGGTGACACGGAAAAGCTCAAGCCAACTTTCCAAAACGCTTTAAACATTGGCAGTTTGAAAGATGCGAACGAAAAGGGTATATACCAAGCAGCCAAAGACGCTGGAACGTTACGCGGTTTGGGGGTAATGTTCAAAAATTACAGCCGTGAAAAACTTAACACGGCCAAAGCCGCTTTAAGTCTGAGAAATGCAGCGTTAAACCATCAAAAACAAGCGGCCGGCTTAGAGTTGCAATGGCAACAAGGATCGGCAAGACATTTACAGGGAATGTCAGAGACTTTAATGCAGCTTGGTATCGTCCAAGAAAACCAC…	P048	453	NA	-1	40452	40904
A-Alj1000051	33509	33703	1	hypothetical protein	MYHYHVDFTCGKIKNYARFTLKRKILVGTYDVCMMEIRNRIKAAYKAGFDEIVIIHSFQLLEHN	A-Alj1	ATGTATCATTATCACGTTGACTTTACTTGTGGAAAAATCAAAAATTACGCAAGATTCACATTAAAGCGTAAGATACTTGTCGGTACTTACGATGTTTGTATGATGGAAATACGCAACCGAATAAAAGCAGCTTATAAAGCTGGTTTTGATGAAATTGTTATCATTCACAGTTTTCAATTATTGGAGCATAACTGA	P047	195	NA	-1	40141	40335
A-Alj1000052	33703	33978	1	hypothetical protein	MKYFLRFGTYTAIATTTLLGVINPQFRLICGVFVAGYLLYAGSDTYKIAIEHYEEHRRYYKDSFIYAISRNALDIGCFCLSLAVAVFLAIA	A-Alj1	ATGAAATACTTTTTACGCTTTGGTACATATACGGCGATCGCTACAACCACTTTACTCGGTGTAATCAATCCACAATTCAGATTGATTTGTGGTGTGTTTGTTGCAGGTTATCTTTTATACGCTGGTAGCGATACGTATAAAATTGCTATAGAACATTACGAAGAACATCGACGTTACTATAAAGATTCGTTCATCTATGCGATTTCTCGCAATGCTTTAGATATTGGATGCTTTTGTCTGTCGTTGGCGGTTGCTGTTTTTTTGGCGATCGCTTGA	P046	276	3 TMP	-1	39866	40141
A-Alj1000053	34020	34211	1	hypothetical protein	MYYYHVAFQSYDQGEHIGREMLFLTEKITSSNYDNCLKVMETVLKNKYGYESVITHFQLLEDV	A-Alj1	ATGTATTACTATCACGTAGCTTTCCAAAGTTATGATCAGGGTGAACATATTGGAAGAGAAATGTTATTTTTGACTGAAAAAATAACATCATCCAATTACGATAATTGTTTGAAAGTGATGGAAACGGTTTTAAAAAATAAATATGGTTACGAATCTGTTATAACTCATTTTCAATTATTGGAGGACGTATGA	P115	192	NA	-1	39633	39824
A-Alj1000054	34208	35791	1	hypothetical protein	MKKPLGGFLKSEIDNKYIEARKKLLLIKTLGIVSVGLFTAAVANPKQPKYDLVGQLGFSSLFSLVAAYICKENDDLFTQYDTFVKMNREHKKNEISLNFGKAMIVNEVANEIDLASRLQNLPAPAQIRYINKYALQGLLTPVIDPPESSYSAFSADENGKYGISLDSDLRELERKTEIDLSWIDSAFVNSSKIVVGAKGSGKSVYLRYEAARWLIENPSGYLLIVDPHYDRRVESKHWLCDLDQKIVMKKFLAKSKETRNHGEENEWRGYLYHLGNAWIELQRRIDDSGDDFDDDTIPDYRPVKIIIDELENIKSTCNEAEFKQILKLIDCIQNEGRKYRYEITVGMHGLKKETTGLDSTTVAQMNWFLFEKACYDPTTKFPADFDSREIKEISKTIST…	A-Alj1	ATGAAAAAACCGCTAGGGGGTTTCTTAAAATCGGAAATCGATAATAAATATATAGAAGCTCGTAAAAAGCTTTTACTCATCAAAACTCTGGGTATAGTGTCTGTCGGTTTATTCACGGCGGCGGTAGCCAACCCAAAACAACCAAAATATGATTTAGTCGGTCAACTTGGATTTAGTTCTTTGTTTTCTCTGGTAGCTGCATATATTTGTAAAGAAAATGACGATCTCTTTACACAATATGACACGTTTGTAAAAATGAATCGTGAGCATAAGAAAAACGAAATATCGCTTAATTTCGGTAAAGCGATGATAGTAAACGAAGTGGCAAACGAGATTGATTTGGCATCAAGGTTGCAAAATTTGCCAGCACCAGCACAAATACGTTATATCAATAAATAT…	P045	1584	2 TMP	-1	38053	39636
A-Alj1000055	35941	37023	1	hypothetical protein	MQTVFLGTCWDSVKSIDILAQAGYNIEKETKGIIKLEHLLPEEQNIFNGLISLLDLKYGEDVTNVGLSIFNEDWQYVYFTYPAVGIGDKDQLGLMIGCSNATEKSAFLPMVFTPGKDDESGDYHLVTPKGKKVKVGLTSIPGSDNKTRHYLMIKNKSFIFNIPFKSASDDLSTGFVNSAFDDGTFHECCKSFMKSGVKFSTMFKKSFLDGYFPENGVILVLGKGKISESEQYGRSSIWEVINSSHPDLVVLDATKETPGEMELKDAGTIFCSSACSASKHLFAGKSGQDPYIIWVKARNPNNINHLPLHDGYQIALVPPKFKAKFPDMLEKAKQIALGNFSANMKAISGSVVEDPALADF	A-Alj1	ATGCAAACAGTATTTTTGGGTACTTGTTGGGATTCCGTGAAATCTATTGACATTTTAGCTCAAGCGGGATACAACATCGAAAAAGAAACCAAAGGTATTATAAAGCTTGAACATCTGTTGCCAGAGGAACAAAACATTTTTAACGGTTTAATATCTTTACTTGATTTAAAATATGGTGAAGACGTGACAAACGTAGGTTTGTCAATTTTTAATGAAGATTGGCAGTATGTGTATTTCACTTATCCTGCCGTTGGTATAGGCGACAAAGATCAGCTAGGATTAATGATCGGTTGTTCCAACGCTACCGAAAAATCTGCATTTCTACCGATGGTTTTTACTCCCGGTAAAGATGATGAAAGCGGTGATTATCATTTAGTTACACCTAAAGGCAAAAAAGTC…	P044	1083	NA	-1	36821	37903
A-Alj1000056	37152	37322	1	hypothetical protein	MKDQYLGKQFTWNQTTYTVKRMMGDNNKAYVCKPLKGSADTRERWFMIDELNELIK	A-Alj1	ATGAAAGATCAGTATTTAGGCAAACAGTTCACATGGAATCAAACCACATACACGGTTAAACGTATGATGGGTGATAACAACAAAGCTTATGTTTGCAAACCCTTGAAAGGTTCCGCAGACACCAGAGAACGATGGTTTATGATCGATGAATTGAACGAGCTTATCAAGTAA	P116	171	NA	-1	36522	36692
A-Alj1000057	37381	37719	1	hypothetical protein	MWIEETRKFINSFTNFEELINALHDLVKCYDPDPKNKGFRIFATLEESYDFNGGLFVSTGDISGFLIDVSNEKGVIIVRFRETGRVGLRHAESKKIKTHGWIEPWTNETVNI	A-Alj1	ATGTGGATCGAAGAAACTAGAAAATTTATCAACTCTTTCACTAACTTTGAAGAACTGATCAATGCTTTACATGACTTAGTAAAGTGTTATGATCCAGATCCTAAAAACAAAGGTTTCAGAATTTTTGCAACATTGGAAGAATCTTATGATTTTAATGGTGGTTTATTTGTTAGCACTGGGGATATATCTGGATTTTTAATCGATGTCAGTAATGAAAAAGGTGTTATTATTGTACGCTTTCGTGAAACTGGTCGTGTGGGTTTAAGACACGCTGAATCGAAAAAAATCAAAACGCACGGATGGATCGAACCTTGGACAAATGAAACGGTGAATATTTAA	P117	339	NA	-1	36125	36463
A-Alj1000058	37733	38050	1	hypothetical protein	VKRTYTYDGFTGTKKQWSERLGIGYQSMLRRFEKHWPDRPEKVFSTVYLTPGANMLNETCKDAKKRSDESMKKQYKYCQLLAIRKHLKQQLTSVEKQIKDNGFGR	A-Alj1	GTGAAACGGACATACACTTACGATGGATTCACAGGCACTAAAAAACAATGGTCAGAACGTTTAGGTATTGGTTATCAGTCAATGTTAAGAAGGTTTGAAAAACATTGGCCTGATAGACCGGAGAAAGTCTTTTCAACCGTTTATCTGACTCCGGGGGCAAATATGCTAAACGAAACTTGTAAAGATGCTAAAAAACGTTCTGACGAGTCGATGAAAAAGCAATACAAATATTGTCAATTACTAGCCATAAGGAAACACCTTAAACAGCAATTGACAAGCGTTGAAAAGCAAATTAAGGATAACGGGTTTGGAAGATGA	P043	318	NA	-1	35794	36111
A-Alj1000059	38047	38250	1	hypothetical protein	MKEHIIRKYRQSNIKQQVKELTAQNYVVVVAHFRDGERFQIMSKHETKGQAWRTIGSKRNCFIVERG	A-Alj1	ATGAAAGAACACATAATTAGAAAATACAGACAGTCAAACATCAAACAGCAAGTAAAGGAATTGACCGCGCAAAACTATGTTGTTGTTGTGGCTCATTTTAGGGACGGTGAACGCTTTCAAATCATGTCAAAACATGAAACAAAGGGGCAAGCTTGGCGAACAATCGGAAGCAAAAGAAACTGTTTCATAGTTGAAAGGGGTTAA	P118	204	NA	-1	35594	35797
A-Alj1000060	38252	38467	1	hypothetical protein	MDIIFFETDCVYCFYSDYETLCNLGNFLESVNLDPSWHETEALNVQSEKDLQALINAYCDLMNIEPNWNKK	A-Alj1	ATGGACATCATATTTTTTGAAACTGATTGTGTTTATTGTTTTTACTCGGATTATGAAACACTGTGTAACCTTGGCAATTTTTTAGAATCTGTTAATCTTGATCCGTCATGGCATGAAACGGAAGCGTTAAACGTCCAATCTGAAAAAGACTTACAAGCGCTGATAAACGCTTATTGTGATTTGATGAACATTGAACCTAATTGGAACAAAAAATGA	P042	216	NA	-1	35377	35592
A-Alj1000061	38464	39879	1	helicase	MIELREYQREQANKLNSATVNTCIQSPTGTGKSVVIKVFTERVNDSGGKVAIIAPNRELVQNIAGYFPAIATTAYTGVKPDLSKSIFVSTYKSYAKYFKAFDHDLMLVDEGYHLPSPTIKRIMEQSKGLTHCLTATPNRLDGAGLFPQMRDLHLSPQVSWFINQGFLSDYELITSECPLFKSSDGSDDLSSQSKLFGSTPECFKTVQMYHEQCYNQRAIVFVSGQEHGQKLVNMFNDSGVYAEFVTAKTDKKHRDRCLELFKLGHLKVLININLFTEGVNVPECENVFLCRFTYSTALYLQMVGRLLRVAPGVNKKLFDLASNVWYHGTPKSTFEWSIHGQPWREADNRSSVNFKCEKCDTDLINKKFVKHSTTVCCLECGHVNYLEPPEEKDTKHRFL…	A-Alj1	ATGATAGAACTCAGAGAATATCAACGAGAACAAGCCAACAAACTAAATTCAGCAACCGTCAATACCTGCATTCAATCCCCTACGGGAACGGGTAAGAGCGTCGTTATAAAGGTATTTACAGAGCGTGTAAATGACTCCGGGGGTAAAGTTGCTATAATCGCTCCTAACCGCGAATTGGTGCAAAATATAGCCGGATACTTTCCAGCGATTGCGACAACAGCTTACACCGGAGTCAAACCGGATTTATCAAAAAGTATTTTTGTTTCGACATATAAAAGTTATGCAAAATACTTTAAAGCTTTTGACCATGACTTGATGTTAGTTGATGAAGGTTATCACCTACCATCACCGACGATTAAACGTATTATGGAACAGTCCAAAGGATTGACCCATTGTCTG…	P041	1416	NA	-1	33965	35380
A-Alj1000062	39872	40072	1	hypothetical protein	MNKVTALSIRRESIEKLVYYNRDAKRALENGKVPESNVNIVRKKIARNNVIVAKFIEDVIFASELN	A-Alj1	ATGAATAAAGTTACAGCGCTTTCAATCCGTCGAGAATCAATAGAAAAGCTTGTGTATTACAATAGAGACGCTAAAAGAGCATTAGAAAATGGTAAAGTACCTGAAAGCAACGTTAACATTGTTAGAAAAAAAATAGCTCGTAACAATGTTATAGTTGCCAAGTTTATCGAAGATGTGATATTTGCCAGTGAGTTAAATTGA	P040	201	NA	-1	33772	33972
A-Alj1000063	40106	40321	1	hypothetical protein	MSTSDIDIEIYGEWENDPSKFWNWCDHCDRITTVISATDPYIDELYKDDDEMDNTESNWCRVCYCKRKEEI	A-Alj1	ATGTCAACAAGCGATATAGATATCGAAATTTACGGAGAATGGGAAAACGATCCATCAAAATTTTGGAATTGGTGCGATCATTGCGATCGCATCACCACGGTTATTTCCGCCACCGATCCTTACATCGATGAGCTTTACAAAGATGACGACGAGATGGATAATACAGAATCTAACTGGTGTAGGGTTTGTTATTGTAAACGTAAAGAAGAGATATAA	P039	216	NA	-1	33523	33738
A-Alj1000064	40334	40522	1	hypothetical protein	MGNYETMKKLDQAIDYLESAINNLESIENTNRTLEVISDQMLVQLNALQHQQKIYRDAWENE	A-Alj1	ATGGGAAATTACGAAACAATGAAAAAGCTTGACCAAGCTATTGACTATCTAGAATCAGCTATAAATAATTTAGAGTCAATAGAAAACACTAACAGAACTTTGGAAGTAATATCCGATCAAATGTTAGTACAATTGAACGCATTACAACACCAACAAAAGATTTATAGGGACGCTTGGGAAAACGAATGA	P038	189	NA	-1	33322	33510
A-Alj1000065	40549	42555	1	DNA polymerase	MTPGKLGVFYDIIIVVHLLQIYPMKLFEYKIENGTITIDESSLDLFSYYEEPIPDWEPTADIKPFNELTRLGVDIETTGLNPENNRIMLIGIYNESGKYHIFHDEDERKMLISFIGVLNRKKPDILEGFNHIEFDLKFIIKRCEKLRIPHPFTIAQKETTIRTAQQFGKPFTFFHIWLKYEDAPRSQHTAVIDLYPAVLQWDFVKRKLTKYTLKQNVLQMGLRKEARTELSYSQMMEEWENREENNLTLLKEYLQFDLEDTKLLGDFLIPAIYYQKLFIPDWKLQSIATAGFGSKWNDILKREYCLEPLPVSDTRKHFEGGLTDSIYGFFENVIKIDVASLYPSIMLTYGVCSSKDHRKVMLSILKYLKTQRIKAKAIANDVKAEPKIKLDAEHKSGSD…	A-Alj1	ATGACTCCGGGGAAACTCGGAGTTTTTTATGATATAATCATTGTTGTACATCTATTGCAGATATACCCCATGAAATTATTTGAATACAAAATTGAGAATGGAACCATCACCATTGATGAAAGTTCTTTAGATTTGTTCTCGTATTATGAGGAACCGATCCCAGACTGGGAACCAACAGCAGATATAAAACCTTTCAACGAGCTTACACGTCTAGGTGTAGACATCGAAACCACTGGATTAAATCCTGAAAACAATCGCATCATGTTAATCGGGATTTATAACGAATCAGGGAAATATCACATTTTCCATGATGAAGATGAAAGAAAAATGTTAATATCTTTCATCGGCGTGTTAAATCGTAAAAAACCTGACATTCTTGAAGGTTTCAATCATATTGAA…	P037	2007	NA	-1	31289	33295
A-Alj1000066	42539	42706	1	hypothetical protein	MIRLNKYRQLKTKADKLSKTLFRLRLALNTPELIEMENDNDKLRHCLYLLSLESL	A-Alj1	ATGATCCGATTGAATAAATATAGACAACTGAAAACAAAAGCTGACAAGTTAAGTAAAACATTGTTTAGACTGCGGTTAGCTTTAAACACGCCAGAGTTAATAGAAATGGAAAACGACAACGATAAACTACGACACTGTTTGTATTTATTATCGTTAGAGTCACTCTAA	P100	168	NA	-1	31138	31305
A-Alj1000067	42828	43250	1	hypothetical protein	MTRLTFAKVSEEFQSMGYTLKKEKRGYSCEVSDKFQNLKDAQEWLYNQVSLAKESEIEENEEFQPVIYVFSVRNCREEHVKKIIDTMSTDIGEECVKQDEYGLIQALVYELDPENGDNQSLYISEWVDKFPCIALVKTIY	A-Alj1	ATGACACGCTTAACATTCGCTAAAGTTTCAGAAGAATTTCAATCAATGGGATACACTCTCAAAAAAGAAAAAAGAGGTTACAGTTGTGAAGTATCTGATAAATTTCAAAATTTAAAAGATGCTCAAGAGTGGTTATACAATCAAGTGTCTTTGGCAAAAGAATCTGAGATTGAAGAAAATGAAGAGTTTCAACCAGTGATTTATGTATTTAGCGTGAGAAATTGTCGAGAAGAACACGTCAAAAAGATAATTGATACCATGAGTACGGATATAGGCGAAGAATGTGTAAAACAGGATGAATACGGACTAATACAGGCTTTAGTATACGAATTAGATCCAGAAAACGGGGATAATCAAAGCTTATACATATCGGAGTGGGTTGATAAATTCCCATGTATA…	P035	423	NA	-1	30594	31016
A-Alj1000068	43415	43675	1	hypothetical protein	MKSKLETLSSIKQSSYSLCQRKFKINKEDVKEFTKWMIKLCVSDDPDCSTTDLKYREPWARGYYTLLNTEQDGRANFVKKILKIKY	A-Alj1	ATGAAAAGCAAACTAGAAACACTTAGCAGCATCAAACAATCCTCATATTCTTTATGCCAACGTAAATTCAAAATAAACAAAGAAGATGTTAAAGAGTTTACAAAATGGATGATAAAGCTTTGTGTCAGCGACGATCCGGACTGCTCAACAACGGATCTCAAGTATAGGGAACCTTGGGCTAGAGGTTATTACACACTGTTAAACACCGAACAGGATGGTAGAGCGAATTTTGTCAAAAAGATTTTGAAGATTAAGTATTAA	P119	261	NA	-1	30169	30429
A-Alj1000069	43698	43844	1	hypothetical protein	MKQYKVVWIENAKIRQYSTNNQNKALMLAEYLDLMCVWCRFYDNDQII	A-Alj1	ATGAAACAATACAAGGTTGTGTGGATAGAAAACGCCAAAATAAGGCAGTACAGCACAAACAATCAAAACAAAGCTTTGATGTTAGCTGAATACTTGGATCTCATGTGTGTATGGTGCAGATTTTACGACAATGATCAAATAATATAA	P120	147	NA	-1	30000	30146
A-Alj1000070	43892	45034	-1	tail collar protein	MVRKVFNDGDILYAEDVNIIGQPFVDGQDLLGHGVKVDDNSLDDSPDQIKARFYAWYNRFRVTIQSGLTLSVTQGSISVSGNIISFPPQTINAINNSNSFVWIGKTDVDPAIALRVSQTLPEVCIPLARIIAASGSITSVTDLRDVSVDVLPPSIPDAVPVGSTIISLIPPTSPAPAGYLELLNTPQNVSRITYSALFAEWGTYYGAGDGSTTFGVPGTGGRYLRLVGTGLEVGSIGGNNQITIPANALPTHQHGIPATTHTHGVNQTPHGHGVSQVPHGHTIEDFGHSHAIPFSALLDQGSGGAFDYGSSPFDGGVKTTHSQTGITINGSNANIGIEGSNANISIQSASTGLTATGNAGNGAAFQHDQPYLIFRVFVKV	A-Alj1	ATGGTACGTAAAGTTTTTAATGACGGTGATATTTTATATGCTGAAGATGTCAACATTATCGGTCAACCGTTTGTTGATGGTCAGGATCTATTAGGTCATGGTGTAAAAGTTGATGATAACAGCTTAGACGATTCGCCGGATCAAATAAAAGCTCGCTTTTATGCGTGGTATAATCGCTTTCGAGTGACTATACAAAGCGGTTTAACGCTTTCAGTCACACAAGGTAGTATCAGCGTTTCAGGTAACATTATAAGCTTTCCGCCTCAAACCATCAACGCCATAAACAATTCTAATAGTTTTGTTTGGATAGGTAAAACTGATGTAGATCCAGCGATCGCTTTAAGAGTTTCACAAACTTTACCAGAAGTCTGTATACCATTGGCGCGGATAATCGCCGCA…	P034	1143	NA	1	28810	29952
A-Alj1000071	45069	46460	-1	tail fiber	MTNIVGRIGFLTTGKLGIKLRGVLIDESTTPNTTYLPGIETFFDITSNLLTSASYPETETQNITATFSIYAVDGVDPVFPALLSFDAIVPNVASVEFDVLAPTGVVNNQLDTSALRIAKVIANDPALAQKVAGAPYPRGAYSASETYLYGEMVSYFGKNYISKSLSPIINILPTVTDSWYELVITLPPEVSVIATGSDTAYGVGWNGSLLVPTQNAVYDKIVTVDAAIATANTNIVTLGSAKADLSYVNSELSADQALINALSSDKADLSYVNTQLGSKANLNSPAFTGNPTAPTPPTSDSDTSLATTAYVKANLLDYPTNATLTNGLNAKANLNSPALVGVPTTPTPGLNSNNSSIVNSAWVQALLNAAQDDQGRFYVRVGFGIAVKFGSTVVTTAGE…	A-Alj1	ATGACTAACATTGTAGGACGGATAGGTTTTTTGACCACTGGTAAATTAGGTATAAAATTACGTGGTGTTTTGATAGACGAAAGCACCACACCAAACACCACTTATCTACCGGGTATTGAGACTTTTTTTGATATTACATCCAACCTGTTAACAAGCGCTTCTTATCCTGAAACGGAAACGCAGAACATAACAGCGACTTTCAGTATTTACGCGGTTGACGGTGTTGATCCGGTTTTCCCTGCTTTGCTTTCTTTTGACGCGATCGTGCCGAATGTTGCGTCAGTAGAATTTGACGTTTTAGCTCCCACCGGAGTAGTTAACAATCAATTAGATACTTCAGCTTTAAGGATCGCTAAAGTAATAGCCAACGATCCGGCATTAGCTCAAAAAGTCGCTGGC…	P033	1392	NA	1	27384	28775
A-Alj1000072	46463	47038	-1	tail collar protein	MSKDAFVAWNVDRRPIYSRMPKEQVGTSYHDYIATDWLTAYWDKIFVECYDKLEDLPRQFNPLECDEEYLDFLAPLCGWTAPYWSGDYPPESKRVLLANSYSLIWKDKGSLTVLSFVLNALFINHRIFVPGSFILGISQVSEDTLGAAGWEFEILLPRNYPENGYEFRLTRKIAELFSPLWCRYQIRYENI	A-Alj1	ATGAGTAAAGACGCTTTTGTGGCTTGGAACGTTGACAGACGGCCTATTTATTCCCGTATGCCTAAAGAGCAAGTGGGAACCTCTTATCATGACTATATAGCTACTGATTGGTTAACGGCATACTGGGATAAAATTTTTGTAGAGTGCTACGACAAACTTGAAGACTTACCGCGCCAATTTAATCCATTAGAATGTGATGAAGAGTATTTAGACTTTCTTGCACCGTTGTGTGGATGGACTGCGCCTTATTGGTCAGGGGATTATCCCCCGGAGTCAAAACGGGTTTTATTAGCTAATTCTTATTCGCTGATATGGAAAGATAAAGGCAGTTTAACCGTACTGTCATTCGTTTTAAATGCGTTGTTTATTAATCATAGAATATTTGTTCCGGGATCGTTC…	P032	576	NA	1	26806	27381
A-Alj1000073	47038	48210	-1	baseplate wedge protein	MTTDLNAPQLVIDDYEGLIIDSLVHTNIVSNGEFTDLDPSGFMRPFAGTMAYAGSELLYKANLASIAAAKSFFKNVLGVPEDAGTKATTTLQFGLSASLSTDFIVPINFQVSDLSGTLRFYTVGNLVIPAGATFGTVEAIAEDIGEKYNVSANFIDQYSTPLTYLQYVTNIRPASNGRSGETIDNLIERCAQIIRIRNPVSALDFEQLAQLTMGDGSRCKAIGLLGINKIVTDPQPGVVHLFLLDVNGNPADPVLISTVGATLQPRIMLGTRLLISPMEVLNIELELIALSDSSKTFQQLANDVLSALEIFFDPVNLTPGEPVLIEEVKFAIRSVGGLSISYLQMNDNAINVPMPNQWTIPRFSYIGFELTDSEGTVYRDNVITVTNPEE	A-Alj1	ATGACAACTGATTTAAACGCGCCACAATTAGTTATAGACGATTATGAAGGACTGATCATCGATTCTTTGGTACATACCAATATTGTAAGCAATGGTGAATTTACTGATCTAGATCCTTCCGGTTTCATGAGACCTTTTGCTGGGACAATGGCCTATGCGGGATCTGAACTGTTATACAAAGCAAATTTAGCATCAATAGCGGCTGCAAAGTCTTTTTTTAAGAATGTTCTGGGAGTACCCGAAGACGCTGGAACCAAAGCCACAACCACTTTACAGTTTGGTTTATCCGCCTCATTATCCACAGATTTTATAGTGCCTATAAATTTTCAGGTTTCCGATTTATCAGGCACTTTAAGATTTTACACCGTTGGTAATTTGGTTATCCCTGCCGGGGCAACT…	P031	1173	NA	1	25634	26806
A-Alj1000074	48252	48590	-1	hypothetical protein	MYVYPPRIINGTLYKSSDLAEYTRGKILQTLSIVRGELVADPFFGVPLRLFSSVKDYQSDVAKIEVILKEEIPEADFIVTGDISNNGLVTLTVYWAYLGTENIETFEIDINF	A-Alj1	ATGTATGTATATCCGCCTAGAATAATAAACGGTACTTTATATAAATCTTCAGATTTAGCAGAATATACACGCGGTAAGATTTTGCAAACGCTGTCAATAGTTCGGGGTGAGTTAGTAGCCGATCCGTTTTTTGGCGTTCCTTTGCGGTTGTTTTCCAGTGTCAAAGATTATCAATCAGACGTTGCAAAAATCGAAGTTATTTTAAAAGAAGAAATACCAGAAGCTGATTTTATTGTGACTGGCGACATTTCAAATAATGGGCTAGTAACACTAACGGTTTATTGGGCTTATCTGGGAACTGAAAATATTGAAACTTTTGAAATTGATATAAATTTTTAA	P030	339	NA	1	25254	25592
A-Alj1000075	48661	48990	1	hypothetical protein	MFSLTINIYNGDQGSATAEINTKLDGVINKMSELGDKLTQLEELTQVEVQEFQTIILKIGDLRSTVEAQTAEIARLNELVASGGAVTPEELQRLDNLIASVSAIVNPDV	A-Alj1	ATGTTTTCACTCACCATTAACATTTACAATGGTGATCAAGGTTCTGCAACAGCAGAGATCAACACCAAACTAGACGGAGTAATAAATAAAATGTCTGAATTAGGCGATAAGCTTACTCAATTGGAAGAACTTACTCAAGTAGAAGTACAAGAATTTCAAACTATCATCCTGAAAATCGGTGATCTTCGTTCTACCGTAGAAGCTCAAACGGCAGAGATCGCACGATTAAACGAATTGGTTGCTTCCGGTGGTGCTGTTACTCCTGAAGAATTACAACGTCTGGACAATTTAATCGCCAGCGTTTCAGCTATCGTCAATCCTGACGTATAA	P029	330	Signal peptide	-1	24854	25183
A-Alj1000076	49181	49642	1	hypothetical protein	MVKNVWQALCDAIAGNSDVNDDGWTDYQMSTESSEEYQARILAKAESDSHLRKRTNAQLNDPDDGLTQANIEQARREGLISKEEYNRELKKLRKDKWNNTGIDNNYVLCEDGIHRKPSEILQQNQEKKEEPKRTRKVWRMGDDHCMHEVEEEY	A-Alj1	ATGGTCAAAAATGTATGGCAAGCGCTTTGTGATGCTATTGCAGGTAACAGTGATGTGAATGATGACGGATGGACAGATTACCAAATGTCTACAGAGTCATCAGAAGAGTATCAAGCAAGAATTTTGGCGAAAGCTGAGAGTGACTCTCATCTGAGAAAACGCACCAACGCACAATTAAACGATCCTGATGATGGATTGACACAAGCGAACATTGAACAAGCCAGAAGAGAGGGACTGATAAGTAAAGAAGAATACAATAGAGAACTGAAAAAATTGCGAAAAGACAAATGGAATAATACAGGAATTGATAATAATTACGTGCTGTGTGAGGACGGTATACACAGGAAACCATCGGAAATATTACAGCAAAATCAAGAAAAGAAGGAAGAACCAAAAAGA…	P026	462	NA	-1	24202	24663
A-Alj1000077	49871	50683	-1	valine-glycine repeat protein G1	MIVDEFSSVYECLLYCYRMVKRSEQLNGRRVFPILSVVTNNNDPEGRRRIKIADPLFSNLIESNWIRPIRVSQNQDNPLPQIDQMVIVWFVDGDSEKGYYLPIINDANPSRDKDDPVNDSAVRIEGNNTLTVDKNDSLSIGGNQTVAIAGEQNTNVDGNLIENIGGDIDQNVTGKIEVRSESTILIEADGTIIIKNDSGAFISLGGNGEVLIQDSQGRKIRLGGAFNSTWDLNGLPMQFINATSITIANKQIATVGAVDSRGDTIVSKGW	A-Alj1	ATGATAGTTGATGAATTTTCTAGTGTTTATGAATGTTTGTTGTATTGTTATCGGATGGTCAAGCGGTCAGAACAATTAAACGGTCGCAGAGTTTTTCCTATCCTTTCGGTTGTAACAAACAACAACGATCCAGAAGGACGTAGACGCATTAAAATCGCTGATCCGTTGTTCAGCAACTTGATAGAATCAAATTGGATACGACCGATCAGAGTTTCTCAAAACCAAGATAATCCGTTACCACAAATCGATCAAATGGTTATCGTCTGGTTTGTTGACGGTGATAGCGAGAAAGGTTATTACCTGCCTATCATCAACGATGCCAACCCCTCACGCGATAAAGATGATCCGGTGAATGATAGTGCTGTAAGGATTGAAGGTAATAACACACTGACAGTTGAT…	P025	813	NA	1	23161	23973
A-Alj1000078	51633	52274	1	thymidylate kinase	MNAFHNEKPYAGTFIVFEGVDGAGKTTQANKAYEYLTGLKIPAILTCQPGGTQFGANLRAWLKSDVELTPRLQFLGMILDRLEHVNNVIRPKLLEGFVVLCDRFTWSTIAYQGALGLHRDIIDTMNLFATSDGCNIDPDLILLYDTELQIARERMKSDDRYEKMDDKFYTEVVKTYNRLGYYWDNCRVIDGRNSIDQVWEKTKNHIDKTLKLC	A-Alj1	ATGAACGCTTTTCACAATGAAAAACCTTACGCTGGCACTTTTATAGTTTTTGAAGGTGTAGACGGTGCAGGGAAGACCACACAAGCTAACAAAGCTTATGAATATCTGACAGGATTGAAAATCCCTGCTATCCTTACTTGTCAGCCGGGAGGAACACAGTTTGGAGCTAATTTAAGAGCGTGGTTAAAGTCTGATGTGGAACTTACACCACGTTTGCAGTTTTTAGGGATGATTCTGGACAGACTAGAACACGTTAATAATGTAATCCGTCCAAAGTTGCTAGAAGGCTTTGTGGTACTGTGCGATCGCTTTACATGGTCTACAATCGCTTATCAAGGTGCTTTAGGACTACATCGTGACATCATCGACACTATGAATCTATTTGCGACTTCTGACGGT…	P071	642	NA	1	53912	54553
A-Alj1000079	52500	52778	1	hypothetical protein	MEVKKIVTDFFQINILNGNDYTFQIGHGNVIDREEYKADNDVWHSYDPYSKTECLLEHISTEFFSQGNTDDIEPLLESLVYQVEEYFTPESL	A-Alj1	ATGGAAGTAAAAAAGATAGTAACCGATTTTTTCCAAATAAACATACTTAACGGCAATGATTATACTTTTCAAATTGGTCACGGTAACGTAATCGATAGAGAAGAATATAAAGCTGATAATGATGTTTGGCATTCATACGATCCCTACTCAAAAACTGAATGCTTGTTAGAACATATTTCGACAGAATTTTTCAGTCAAGGCAACACTGACGATATCGAACCTTTGTTAGAATCGCTCGTTTATCAAGTTGAAGAATATTTTACACCGGAGTCACTATGA	P121	279	NA	1	54779	55057
A-Alj1000080	52775	53149	1	hypothetical protein	MKLSKVLLSAAIAFTALTSALPAIAQRPYIVSVQGKTNDGSTLKYDLTSLSNDRGDAVSFTYYIIDKTGDLRQNRGTTFCANRNGWLVPTIDGRGFWVDATSNASNNMLESICRNVFPNWYYRR	A-Alj1	ATGAAATTATCGAAAGTTTTGTTAAGTGCTGCAATTGCTTTTACAGCGTTGACAAGCGCATTACCAGCGATCGCACAAAGACCGTATATTGTTTCAGTGCAAGGAAAAACTAACGATGGTTCGACATTAAAATATGATTTAACATCGTTGAGTAATGATAGAGGTGACGCTGTAAGTTTCACTTATTACATCATAGATAAAACAGGAGATTTGCGACAAAACAGAGGAACAACTTTTTGCGCTAATAGAAACGGTTGGTTAGTGCCTACAATCGACGGTAGGGGTTTTTGGGTCGATGCAACGTCTAACGCTTCCAACAATATGCTTGAAAGCATTTGTCGTAATGTTTTCCCTAACTGGTATTACAGACGATGA	P072	375	Signal peptide	1	55054	55428
A-Alj1000081	53146	53583	1	hypothetical protein	MKKTARRIEIDRQRYGDRNNPEYIDLCHRVHKSCGDRCVICTKKSTEIHHAYYLGYKKDSPGVNVFAVCRKCHLSQCHRYNTWLPNHDEPMKSRNTEEFITYLHQRFLFVSQAFNGIKGVMSYYGMPKNKRGNTRSHRVSDKTKK	A-Alj1	ATGAAAAAAACTGCAAGACGAATTGAAATAGATCGACAACGATACGGAGATCGTAACAATCCTGAATATATCGATTTGTGTCACCGTGTGCATAAAAGTTGTGGCGATCGCTGTGTTATTTGCACAAAAAAATCTACAGAAATACATCACGCTTATTATCTGGGATACAAAAAAGATTCCCCCGGAGTCAATGTGTTTGCTGTATGTAGAAAATGTCATCTTTCACAGTGTCACCGATATAATACTTGGTTGCCAAATCATGATGAACCGATGAAAAGCCGTAATACGGAGGAATTTATAACTTATTTACATCAAAGATTTTTGTTTGTTAGTCAAGCTTTTAACGGGATAAAAGGAGTAATGAGTTACTATGGAATGCCAAAAAACAAACGCGGAAAT…	P073	438	NA	1	55425	55862
A-Alj1000082	53585	53677	1	hypothetical protein	LDHYPGTLVQKSAVKRGVDTAIFWLEVLQK	A-Alj1	TTGGATCATTATCCTGGTACACTGGTACAAAAAAGCGCTGTTAAACGTGGTGTGGACACCGCAATATTTTGGTTGGAGGTTTTACAAAAATGA	P122	93	NA	1	55864	55956
A-Alj1000083	53674	54033	1	hypothetical protein	MIIGGKNYSEKYLNRLLQIGTFSQHFDKLLTKPDQYYEVLKSKPKAIAKLKQLILFPLPSDFLVCCKEFDFLVLRATSKQKIDIVVHYEHRLNRICSLIEKFQLSLTENEKQILKKLGR	A-Alj1	ATGATCATCGGTGGTAAAAATTACAGCGAAAAATATCTTAATCGGTTGTTGCAAATCGGTACGTTTTCACAACATTTTGACAAATTATTGACAAAACCTGATCAATACTATGAAGTGTTGAAAAGCAAACCGAAAGCTATCGCTAAACTGAAACAATTGATTTTGTTTCCTTTGCCGTCAGATTTTCTTGTATGCTGTAAAGAATTTGATTTTTTGGTGTTACGTGCAACATCAAAACAAAAAATTGACATCGTTGTACATTATGAACATAGATTAAATAGAATCTGTTCATTGATTGAAAAATTTCAATTATCATTGACCGAAAACGAAAAACAAATCCTAAAGAAACTGGGAAGATGA	P074	360	NA	1	55953	56312
A-Alj1000084	54030	54311	1	hypothetical protein	MSKALRDYQRSSYDMFLTNIIEKVLNAKESHFNFKVYAKSNRQLVKQSFIRCLKKRLIPFTVDGFIFQFMQKTVKITYVYKNPMDRIVYVFSH	A-Alj1	ATGAGCAAAGCTTTGAGAGATTATCAACGAAGTTCCTATGATATGTTTTTGACAAATATCATAGAGAAAGTGTTAAACGCTAAAGAGTCGCATTTCAATTTTAAAGTTTATGCAAAATCTAATAGACAATTAGTAAAACAGTCTTTTATTAGATGTCTCAAAAAACGTTTAATACCTTTTACAGTTGACGGTTTTATTTTTCAATTCATGCAGAAAACTGTAAAAATAACGTATGTTTATAAAAATCCTATGGATCGGATCGTTTATGTCTTTAGCCATTAG	P123	282	NA	1	56309	56590
A-Alj1000085	54295	55341	1	DNA-cytosine methyltransferase	MSLAISLFTGVGGFDLGVERAGFKVAVANEIDVKTASTYAQNFKTPMIVEDVRNLTSRKLRESGGIGQRDVDLVFGGSPCQGFSQAGCRNESDSRNFLIFEYQRIVLDIYPKYFIFENVSELLNKRNETLLNSFISGFEEEGYRIVPIRVLNASSHDIPQSRKRVFMLGYRYDRKAPQYPPESKQRFTLHDAIADLKFTNGYEKLKYVDRVPELVYDEPSNYVKNYHKLLGSNIDFTEVIRPITASKFTRHDYQTTKNFLSYPQGYFEKFGRRIKPLYNDVCNTIVTKQRLIHPIYPRYLTVRECARIQSFPDDFNFYPTIEQGQKEVGNAVPPLLGFQLASEILKVL	A-Alj1	ATGTCTTTAGCCATTAGTTTGTTTACAGGTGTCGGAGGTTTTGATCTTGGTGTGGAACGAGCAGGTTTTAAAGTCGCCGTGGCAAATGAAATAGACGTTAAAACCGCTTCCACATACGCGCAAAACTTTAAAACGCCGATGATCGTTGAAGATGTTAGAAATTTAACATCAAGAAAATTACGTGAGTCCGGGGGGATCGGTCAACGTGATGTTGATCTGGTTTTTGGTGGTTCACCCTGCCAGGGATTCAGCCAAGCCGGATGCAGAAATGAGAGTGACTCTAGAAATTTTTTGATTTTTGAATATCAACGGATAGTACTTGATATCTATCCAAAGTATTTTATCTTTGAGAACGTTTCAGAGTTGCTTAATAAACGTAATGAAACGCTGTTAAATAGC…	P075	1047	NA	1	56574	57620
A-Alj1000086	55338	55751	1	hypothetical protein	MKNYTIFDVLQFLEFESGNIDFYDLPKRIRELRYEFWQTSKLLKFWWKLRKLSPNMTNIDMFLTHFLGGHISIGRLTIFGCNAMMYMITCRSKTGTWCFRPPCFNTHWEIWTWGCLYFSPNGTPGHEDAVILWDDKY	A-Alj1	ATGAAGAATTACACAATTTTTGATGTTTTACAGTTTTTAGAATTTGAATCAGGTAACATTGATTTTTACGATTTGCCCAAAAGAATTAGAGAATTGAGGTATGAATTTTGGCAAACTTCCAAGCTGTTAAAATTTTGGTGGAAACTTAGAAAACTTTCACCGAATATGACAAACATTGATATGTTTCTGACTCATTTTTTAGGTGGCCATATCTCTATCGGACGTTTGACGATTTTCGGATGTAACGCAATGATGTATATGATCACTTGTAGAAGTAAAACAGGTACATGGTGTTTTAGGCCGCCATGTTTTAATACACATTGGGAGATTTGGACATGGGGATGTCTTTATTTTTCACCAAACGGTACACCCGGACATGAAGACGCTGTTATACTTTGG…	P076	414	NA	1	57617	58030
A-Alj1000087	55751	55906	1	hypothetical protein	MVIEFTLEQLKAVSKALHAAKNDQHIGLLPQGCTALKKIDKAIANNTSYLA	A-Alj1	ATGGTAATAGAATTTACTTTGGAACAATTAAAAGCTGTTTCTAAAGCTTTACACGCTGCAAAAAATGATCAGCATATTGGGTTACTGCCCCAAGGATGCACCGCATTGAAAAAGATTGACAAAGCGATCGCGAATAATACAAGTTATTTGGCGTGA	P077	156	NA	1	58030	58185
A-Alj1000088	55937	56149	1	hypothetical protein	MSLDWLKNHVVNNWKTTLIGLISAFAGFVAFAPDQFPKPLVMLAQYINAGGAVGLGIYAYDSKRKALETR	A-Alj1	ATGAGTCTTGATTGGTTAAAAAATCATGTGGTTAATAATTGGAAAACCACGTTAATCGGTTTAATATCCGCTTTCGCCGGGTTTGTAGCTTTTGCACCGGATCAGTTTCCTAAACCTCTTGTGATGCTTGCACAATATATTAATGCTGGTGGCGCTGTCGGTTTGGGTATTTACGCTTATGATAGCAAACGAAAAGCTTTAGAAACTAGATAG	P078	213	2 TMP	1	58216	58428
A-Alj1000089	56209	56628	-1	hypothetical protein	MLTECYSRSSETVKIDGVWREINTYRRCMAGMVENHTYGFMYMGTMPNGWEPSPTDLVMHDVPGNDNFDDTLGYVRFGESSIVNGTVTFFNVYFFGMLNRTVTRSFNVDEFEFMPDGWEPVPGVHKILWEDVKDENVYE	A-Alj1	ATGTTAACAGAATGTTACTCAAGATCATCAGAGACCGTTAAAATTGACGGAGTTTGGCGAGAGATAAACACGTACAGAAGATGTATGGCCGGTATGGTTGAAAATCATACATACGGATTTATGTATATGGGTACTATGCCTAATGGATGGGAACCATCACCGACTGATTTAGTCATGCACGATGTACCGGGGAACGATAATTTTGATGATACTCTGGGATATGTAAGGTTTGGAGAATCTTCAATCGTTAACGGTACTGTGACATTTTTTAATGTTTACTTTTTCGGTATGCTAAACCGTACAGTAACCAGAAGTTTTAATGTTGATGAATTTGAGTTCATGCCTGATGGATGGGAACCTGTACCCGGAGTACATAAAATACTTTGGGAAGATGTAAAA…	P079	420	NA	-1	58488	58907
A-Alj1000090	56628	57218	-1	hypothetical protein	MRRLQLNDNGDIEASYERKLIGGLNRWYNFDNNYLKIAIGGGASTANIIRYYHLRVPRPVQINNAAISISTSVTGNFRFGLYDNIVIDNAFTPGNLILDFGEQSTSGTGFKTFPISTFDLPDGDYFGATVSSANTGYMGIVNTSAMGDVFGLPTPGNNATACYTQSFTYGALPLVAAPSGEDTRYPSILFRVVGFL	A-Alj1	ATGAGAAGATTACAATTAAACGACAACGGTGATATAGAAGCCAGTTACGAAAGAAAATTGATAGGAGGATTAAATCGTTGGTACAACTTTGATAATAATTATTTAAAAATCGCGATCGGCGGCGGAGCATCTACAGCCAACATAATAAGATATTATCATTTGAGAGTACCACGCCCAGTTCAAATAAACAACGCAGCGATATCTATTTCAACCAGCGTCACCGGAAATTTTAGATTCGGATTGTATGACAATATAGTGATTGATAATGCTTTCACACCCGGTAACCTGATTTTAGATTTTGGTGAACAGTCAACAAGCGGAACAGGATTTAAAACATTTCCAATATCCACGTTTGATCTGCCAGACGGTGATTATTTTGGGGCTACGGTTTCCAGTGCA…	P080	591	NA	-1	58907	59497
A-Alj1000091	57272	57778	-1	hypothetical protein	MSSNRFIGIANGIQTLFTALSASSGAGDASKIVMTDSSGKIDPTLMPSGIGAATKSVLASEALVAGDFVNIYNNTGTLNVRKADSSNNRPANGFVLAPFASSANATVYLQGENTGRTGLTPGSIYFLSTAGGVTTTAPTASGNIIQQLGYSTGATAINFEYNDPIVIA	A-Alj1	ATGTCTTCCAATAGATTCATCGGCATTGCAAACGGGATTCAAACACTATTTACAGCGTTGAGCGCTTCAAGTGGTGCAGGTGACGCTAGTAAAATTGTGATGACTGACAGTTCAGGTAAAATTGATCCAACTCTAATGCCGTCCGGTATCGGTGCAGCAACAAAAAGCGTTTTAGCGTCTGAAGCGTTAGTTGCTGGCGATTTTGTAAACATTTACAATAACACAGGTACGCTAAACGTGCGAAAAGCTGACAGTAGTAACAATAGACCCGCCAACGGGTTTGTTTTGGCTCCTTTCGCTAGTTCGGCAAACGCTACAGTCTATTTACAGGGTGAAAACACTGGTAGAACGGGATTGACTCCGGGGAGTATTTATTTTCTAAGCACAGCCGGGGGAGTG…	P081	507	NA	-1	59551	60057
A-Alj1000092	57790	59760	-1	alkaline phosphatase PhoD	MGTIAATVKITGTVTSARLAVSTSPTMSPRFFSSNIIPDSNNLCKFIVSGLADNTLYYIQTEVNGNLKGNIGKAKTPPTTATSFKFCLASCARDNSNHPIFDAIRGFNPDFFLHTGDIHYEDINVNNVALYHAAYDLVFSLTKQEQLYREFPMFYMWDDHDYADDNSDSTNVSRPAAIQAYRERVPFSNLLIDTSTATSPVYYKFNYGRCVFLVCDSRSQKSPSSDADTSSKTVLGSSQKAWLINEFNNNPNKFIFVIFSFGWMGSASATQDYWAGYHTERVEIANAIKAAGIANRMMILSGDMHGCAYDSGANSDYATGGGAGIRVVQAAPLDQTTSVKGSGWSSGAFSSFQQQFGQIEVIDTGNADIQVNVSLHRYNVSEPSLTTLLFSANNTITIG…	A-Alj1	ATGGGTACAATAGCGGCTACTGTAAAAATAACGGGAACGGTGACAAGCGCTAGACTGGCTGTGTCAACCAGTCCCACGATGTCGCCTAGATTTTTTTCCAGCAACATAATACCCGATAGCAACAATCTTTGTAAATTTATCGTGTCTGGACTGGCCGATAACACATTATATTATATACAAACAGAAGTTAACGGCAACTTAAAAGGTAATATAGGCAAAGCTAAAACACCACCTACAACCGCTACAAGCTTTAAATTTTGTTTAGCATCATGCGCGAGAGATAACAGCAATCATCCAATATTTGATGCTATACGCGGTTTTAATCCCGATTTTTTCTTACATACCGGAGATATACATTACGAAGATATAAACGTCAACAATGTAGCATTGTATCATGCT…	P124	1971	NA	-1	60069	62039
A-Alj1000093	59762	60325	-1	capsid fiber protein	MSVQKFLGFENDVKLFTALSASSGAGDASKILCTNSLGIIDTSFLPSVDAGQIVVTGLATDDLIAGDFINFYNSGGNINVRKADNNTGKIANGFVLETFLNSDIATVYVQGENNLRSGLIPGTIYFLSSEGSVTLTAPNGSGKFVQKLGIAIDENTINFEYNRPVYISDLIGNVDDTTVVSMWTSVY	A-Alj1	ATGTCTGTTCAGAAATTTTTAGGATTTGAAAACGATGTAAAATTATTCACGGCGTTGAGTGCTTCAAGTGGTGCAGGTGACGCTAGTAAAATTTTATGCACAAACTCATTGGGCATAATCGATACAAGTTTTTTACCGTCTGTTGATGCTGGACAAATCGTTGTAACAGGTTTGGCAACTGACGATCTTATAGCTGGTGATTTTATCAATTTTTATAATAGCGGCGGAAACATAAATGTTAGAAAAGCTGATAATAACACCGGGAAAATAGCAAACGGTTTTGTATTAGAAACTTTTCTCAATTCGGACATCGCAACGGTTTATGTGCAAGGTGAAAATAATTTAAGATCAGGTTTAATACCAGGAACAATATATTTTTTATCAAGTGAAGGATCTGTA…	P081	564	Signal peptide	-1	62041	62604
A-Alj1000094	60327	61052	-1	hypothetical protein	MRRLRGTIKHFDDQPWINVSVYLTLINGTFNSVNQYPIDTQQKKTDENGEFIFNVIPNVGVEQSYYILTTPDRKKHAFTIPDGTSDIEFSVVRETGIIATDPEYTNVLNYLEDYIDDAIANIQASSVIAEVFSCGQTISALKAVRYDPVTGKVFYVSSSDETHLNKCVGVSSQSGVLNDNIQVVTSGYLTDQSWNWSVGSPIFFDSGGTLTHTPGSNYYQVIAIPVTNNKILISVEQPIKL	A-Alj1	ATGAGGAGATTGAGAGGCACTATTAAACACTTTGACGATCAACCGTGGATCAATGTTTCCGTTTATCTGACATTGATTAATGGAACGTTTAATAGTGTCAATCAATATCCGATAGACACACAACAAAAAAAGACAGATGAAAACGGTGAATTTATTTTTAATGTCATTCCTAACGTTGGAGTAGAACAAAGTTACTACATACTCACCACACCGGACAGGAAAAAACACGCTTTTACTATACCAGATGGAACAAGCGACATTGAATTTAGTGTGGTTCGAGAAACCGGGATCATAGCAACTGATCCAGAATATACAAACGTTTTAAATTATTTGGAAGATTATATCGATGATGCGATCGCAAATATACAAGCATCATCGGTAATAGCTGAAGTTTTTAGC…	P082	726	NA	-1	62606	63331
A-Alj1000095	61115	61393	1	hypothetical protein	MDNRDLLQSLKNISERLEELEKPPEKMTFSNSIALIGLIITIIAGFSSVMFIGVSKVTTLELRLQNTYEEMIELKNEIREIKNNDTQRRSNN	A-Alj1	ATGGATAATAGAGATTTGTTACAGTCGCTCAAAAACATATCAGAGCGATTAGAAGAGCTTGAGAAACCACCAGAAAAAATGACTTTTTCTAATTCGATAGCTTTGATAGGTCTGATAATTACTATCATCGCTGGATTTTCTTCTGTAATGTTTATCGGTGTGAGTAAAGTTACAACTTTAGAATTAAGATTGCAAAATACTTATGAGGAAATGATAGAATTGAAAAATGAAATTAGAGAAATAAAAAACAATGATACTCAACGACGATCAAATAATTGA	P083	279	1 TMP	1	63394	63672
A-Alj1000096	61365	61964	1	dCTP deaminase	MILNDDQIIELCETQKMIEPYERSLIRFITEEDLKQSKVISYGLSSFGYDIRLSAKEFYTFRHVPGTIVDPKKFNTTNLTPGELFYDENGSYFVIPANSYGLGVAIERLNLPRNITAVCVGKSTYARCGIIANITPAEAGWHGHLTLEFSNSSSADCRIYADEGVVQLLFLEGERCKTSYSDRQGKYQNQPESVVIPRL	A-Alj1	ATGATACTCAACGACGATCAAATAATTGAGCTTTGCGAAACTCAAAAAATGATAGAACCTTATGAGCGATCGCTCATAAGGTTTATTACTGAAGAGGATTTAAAGCAGTCGAAAGTCATCAGCTATGGGTTATCGAGCTTTGGGTACGACATTCGATTGTCGGCAAAAGAGTTTTATACTTTTCGTCATGTTCCAGGTACTATAGTAGATCCTAAAAAATTTAATACTACAAATTTGACTCCGGGGGAATTATTTTATGATGAAAACGGATCGTATTTTGTCATACCTGCTAATAGTTACGGTTTGGGTGTTGCTATTGAGCGCTTAAATTTGCCTAGAAACATTACTGCTGTTTGTGTCGGGAAATCGACCTATGCACGTTGTGGGATAATCGCAAAT…	P084	600	NA	1	63644	64243
A-Alj1000097	62107	63333	1	hypothetical protein	MITFSDVKEISIESLQENFLSGSFAFCEPEVYVRGSVNQDEVEEKKIQLTFEDDGKKYVEVLEPLTFYQRDGVLYLLNGNNRVNALFQMINTTETKVYEYKLVPYRVLESEPSLEVLEELQVVANDTTNAHSALQLAKRVAATSARLEKIYKEADPKIKKTALNGKVLESLCTIYKRQHHYIRNLLRINEQPETVQNLLENELVSVNTVVEIAKKMPKDASDEYIEEVYGELSAIANGGKITEKTLNEWLNSKKPTPPTTENTENEENNTPAPAITIEDFTTSAIDRFNKLSIIEKQHITPALKPQVSSVVKSGLSLLAGTFDIFTDDESLELLEDIRSLIFNRLGDVDHLVKRAEIAGEEIPNIAKKFNSFNKSVDKLYKAYIEPEQETTVTVIATDD…	A-Alj1	ATGATTACATTTTCAGACGTTAAAGAAATCTCAATCGAATCATTGCAAGAAAATTTCCTATCAGGATCATTTGCTTTTTGCGAACCTGAAGTTTATGTACGTGGTTCCGTCAATCAGGATGAAGTCGAAGAGAAAAAGATTCAATTAACTTTTGAAGATGACGGAAAAAAATATGTAGAAGTTTTAGAACCTCTCACATTTTATCAGCGTGACGGTGTTTTATATCTGTTAAATGGTAACAATCGTGTAAACGCGTTGTTTCAAATGATTAACACGACTGAAACAAAAGTTTATGAATACAAATTAGTACCTTATCGCGTTTTAGAGTCCGAACCATCACTTGAAGTTTTGGAAGAATTACAAGTGGTTGCGAACGATACAACTAACGCACACAGCGCT…	P085	1227	NA	1	64386	65612
A-Alj1000098	63441	63908	1	hypothetical protein	LHQLTDKPMKKTAKYSLTSFKLWKNANGKWHFYNAVFDHADKSSLSYMSACKLIQRGWTPYAIAAKPGISSPLQLEMVDTQPLDDYLREKDPVSFVAGECIKEFLNKPVRKYTETFTPESITASDLALQKAIQDYKDGKYVLPHLLKKVLEHHAK	A-Alj1	TTGCATCAGTTGACAGATAAACCGATGAAAAAAACTGCAAAGTATTCTTTAACCTCTTTCAAATTGTGGAAAAACGCTAACGGTAAATGGCATTTCTATAATGCTGTTTTTGACCACGCTGATAAAAGTTCTTTGTCTTACATGAGCGCTTGTAAGCTAATACAAAGAGGTTGGACACCATACGCGATCGCCGCAAAACCTGGAATCTCTTCACCGTTGCAATTAGAAATGGTTGATACTCAACCTTTAGATGATTATCTAAGAGAAAAAGATCCCGTGTCGTTTGTGGCTGGCGAATGTATCAAAGAGTTCTTAAACAAACCTGTCAGAAAATATACTGAAACTTTCACACCGGAGTCAATAACAGCGTCCGATTTGGCGTTACAAAAAGCCATACAA…	P086	468	NA	1	65720	66187
A-Alj1000099	63898	64785	1	DNA methylase	MLNKIHLGDCVQIMKSFPNAFMDLTVTSPPYDNLRDYKGYAFDLKALIRELYRCTKIGGVIVWVVGDQTLNGSESGESFRQALSFMEYGFKLNDTMIYKKHHPKPEITGYRYQPTFEYMFVFSKGTPKTFNPLREPCKNAGQSYTSSTKTLKDGSKIGYNSPFIRDTKIKSNIWEYSVGYMQSSKDAIAFEHPAIFPEQLAEDHILSWSDSGETVFDPFMGSGTVAKVAFRLGRNYIGCEISEEYLAIAEKRLSILSPPESINAGDLALQKAREDYKNGRYVLPHLLKKVLENDN	A-Alj1	ATGCTAAATAAAATACATCTTGGCGACTGCGTACAAATAATGAAAAGCTTTCCCAATGCTTTTATGGATTTGACAGTGACTTCACCCCCTTATGATAATTTGAGAGACTACAAAGGATATGCTTTTGATTTAAAAGCTCTTATACGCGAGTTATATCGCTGTACAAAAATCGGTGGTGTGATAGTCTGGGTAGTAGGCGATCAAACATTGAACGGATCAGAAAGCGGTGAAAGTTTCCGTCAAGCGCTTTCGTTCATGGAATACGGTTTCAAGTTGAATGACACGATGATATATAAAAAACATCATCCCAAACCGGAGATCACAGGATACCGATATCAACCAACTTTTGAGTATATGTTTGTGTTTTCCAAAGGAACACCCAAAACTTTCAATCCATTA…	P087	888	NA	1	66177	67064
A-Alj1000100	64775	65206	1	RusA	MIIKYAFPFPAFPKPRGGIGRYGNMTHSSKGYRQWQKIFLESLSNYHSSGKLFPSDFHCLIFFFYIKPKRGQPPDLENLQGGIQDTLKKAGCITEDNYKIISRYYTDHIVVKDQSRFDLYVVNNHQEKIYVIDKLLPKIDTNN	A-Alj1	ATGATAATTAAATACGCTTTCCCGTTCCCGGCTTTCCCCAAACCACGCGGGGGAATAGGACGTTATGGCAACATGACGCATAGTAGCAAAGGTTACAGACAATGGCAAAAAATCTTTTTAGAGTCACTCTCAAATTATCATAGCTCTGGAAAGTTGTTTCCTAGTGATTTTCATTGTTTGATATTCTTTTTTTACATAAAACCTAAGCGCGGCCAACCCCCGGATCTGGAAAATCTTCAAGGTGGTATACAAGACACTTTGAAAAAAGCCGGATGTATAACAGAGGACAATTACAAAATAATTAGCAGATATTACACGGATCACATAGTTGTAAAAGATCAATCACGTTTTGATCTGTATGTGGTTAACAATCACCAAGAAAAGATTTATGTGATTGAT…	P088	432	NA	1	67054	67485
A-Alj1000101	65245	65595	1	hypothetical protein	MKTVINKERRLKVTYKTVGDKLVLVSPTSYIDPETLEIAVKVLDGKINIDALITNGVDVIDDGESYIEAPDRFWKACGEVKAIVKATEDTFFHKNGTSIYNKNMIIVKRKNEKTKS	A-Alj1	ATGAAAACTGTGATCAATAAAGAACGTCGCTTAAAAGTCACTTACAAAACGGTGGGTGATAAATTGGTTTTGGTGTCACCGACGAGTTATATTGACCCTGAAACGCTGGAAATTGCGGTAAAGGTTCTTGATGGTAAAATAAATATAGATGCTTTGATTACAAACGGCGTAGACGTTATAGACGATGGGGAAAGCTATATAGAAGCGCCAGATCGTTTTTGGAAAGCTTGCGGAGAGGTAAAAGCCATTGTCAAAGCAACCGAAGACACGTTTTTTCATAAAAACGGTACATCGATATACAACAAAAACATGATAATAGTAAAGAGGAAAAATGAAAAAACAAAATCTTGA	P089	351	NA	1	67524	67874
A-Alj1000102	65576	65746	1	hypothetical protein	MKKQNLDNVMYICLPVSTLCLLFLVCQISLMNPGVKKFYDGFWQGFWSNIHFKLTP	A-Alj1	ATGAAAAAACAAAATCTTGACAACGTGATGTATATTTGTTTACCTGTTTCCACGTTATGTTTATTGTTTTTGGTTTGTCAAATATCTCTGATGAATCCCGGCGTAAAAAAATTTTATGATGGTTTCTGGCAAGGTTTTTGGTCAAACATACACTTCAAATTGACACCATAA	P104	171	1 TMP	1	67855	68025
A-Alj1000103	65815	66594	-1	thymidylate synthase	MQVRLIARTTGVENTEYQGKSIDEIITGIARISSSREINDLFEEPHKLLRHCIVNGHWSVFTESNLIFEIVTSRAIGRELLRHWSIRPQEFSQRYAEITKFEEIEIRKQSKNNRQSSTEVFDPVIVSNDRLDIQIRASDLINDALELCENNYKLLLNAGVARESARFISPEATETRLIMNGTIREWITTCNQRLHHTAQKECRLIAEAIRDFLLVECPIISKALYNFEDAYNIHILDRVTLEKFGVYQLVKNNDFKKLK	A-Alj1	ATGCAAGTAAGATTGATAGCACGTACCACCGGAGTAGAAAACACGGAGTATCAAGGTAAAAGCATTGATGAGATTATCACAGGCATTGCACGTATTAGCAGCAGTCGAGAGATTAACGATCTTTTTGAAGAACCTCACAAACTGTTAAGACATTGTATTGTTAATGGTCATTGGTCAGTTTTCACAGAATCAAATTTGATATTTGAAATTGTCACAAGTCGCGCAATTGGAAGAGAATTATTAAGACATTGGAGCATTCGGCCGCAAGAATTTAGCCAACGTTACGCAGAGATAACAAAATTTGAAGAGATTGAAATTAGAAAACAATCTAAAAATAATAGACAGTCATCAACAGAGGTTTTCGATCCTGTAATAGTCTCAAATGACAGATTGGACATA…	P090	780	NA	-1	68094	68873
A-Alj1000104	66638	66955	1	hypothetical protein	MEERQNYFIEVVGNGGITMQILQVYTMFIGFIFESIELIKSDANNLPIALQSLENIIFDAGSIHPDLFVYLNNDKQKFDDLLKSFAKLPETKKTTAKTAIAKDEI	A-Alj1	ATGGAAGAAAGACAAAATTACTTTATAGAAGTTGTCGGGAACGGTGGGATCACTATGCAGATTTTGCAAGTTTATACCATGTTTATCGGTTTCATTTTTGAATCCATAGAATTGATTAAAAGTGATGCCAACAACTTACCAATTGCTTTACAGTCACTTGAAAATATAATTTTTGATGCTGGTTCTATTCATCCTGATTTGTTTGTTTATTTGAACAATGACAAACAAAAATTTGATGATTTGTTAAAAAGTTTTGCAAAATTACCGGAAACAAAAAAAACGACCGCTAAAACAGCGATCGCTAAAGATGAAATTTGA	P091	318	NA	1	68917	69234
A-Alj1000105	66956	67597	-1	hypothetical protein	MSPLSNLLNRYSYPTVDFCDKCRKFTGVRKDGHDLVCRSCDSGVESLLEIKIEPNKAFEKIVKNTESIKAELLTTKKGGNRKLIKKDVLSFVNSLDEPISLKELASFFGVSPQAVRKFFRRDCTAWEFSAQYDPQKREHAIGKHDPDNKLLIILTGLWIIFPSRINIQGLYLLTKLDKKEIVKICQNSEKIGKEKEKGSWRYWLINAHNLYLK	A-Alj1	ATGTCACCATTATCAAACTTGCTCAATCGATACAGTTATCCCACAGTGGATTTTTGTGATAAGTGCAGAAAGTTCACCGGAGTCAGAAAAGACGGCCATGATCTTGTATGCCGTAGTTGTGACTCCGGAGTAGAATCACTATTAGAAATTAAAATAGAACCTAACAAAGCTTTTGAAAAGATAGTAAAAAACACCGAATCAATAAAAGCTGAATTATTGACTACCAAGAAAGGTGGCAACCGCAAATTGATTAAAAAAGACGTTTTAAGCTTTGTAAATTCTTTGGATGAACCGATATCATTAAAAGAATTGGCAAGCTTTTTTGGTGTGTCACCACAGGCAGTCAGAAAGTTTTTTAGACGAGACTGCACCGCATGGGAATTCAGCGCTCAATATGAT…	P092	642	NA	-1	69235	69876
A-Alj1000106	67600	67800	-1	hypothetical protein	MEVWESIKNYLENGADLKDLLIQIEGDENVIYILYGMLKYIDMTGFLEDHQEYLMNYLERQYNLQY	A-Alj1	ATGGAAGTATGGGAAAGTATTAAAAATTACTTGGAAAACGGTGCAGATTTGAAAGATTTGTTGATACAAATAGAAGGAGATGAAAACGTTATCTATATTTTGTATGGAATGTTAAAATATATTGATATGACTGGATTTTTGGAAGATCATCAAGAATACTTGATGAACTATTTGGAACGTCAATACAATTTGCAATACTAA	P093	201	NA	-1	69879	70079
A-Alj1000107	67834	68208	1	hypothetical protein	MYYNAFQQIIVKNKLKTILRLIKSINVDSLCYHDLVLLNKFILKSLFIFKLTPLSKTVIKLLLESLYKTVESLIVKKIDDNTSSKLDRLILILKMINLKLYENDTNLVKIDKNKITIDDRYKHY	A-Alj1	ATGTATTATAATGCTTTTCAACAAATTATAGTTAAAAATAAATTAAAAACTATCTTACGACTGATAAAGTCGATCAATGTTGATAGTCTTTGTTATCATGATTTGGTTTTGTTGAATAAATTCATTTTAAAATCGCTTTTCATTTTTAAATTGACTCCGTTGAGTAAAACGGTTATCAAATTATTATTAGAGTCACTCTATAAAACTGTTGAGTCTTTGATAGTTAAAAAAATAGATGATAACACATCATCGAAACTTGATAGGTTGATATTGATTTTAAAAATGATTAATTTGAAATTGTATGAAAATGATACAAATTTGGTAAAAATAGACAAAAACAAAATAACGATTGATGATAGATACAAACACTATTGA	P094	375	NA	1	1	375
A-Alj1000108	68186	68674	1	hypothetical protein	MIDTNTIDIIKEVLEKSGDINAACIAASITRHTFEKWLQLYPTFKDIVTESKEFYKNCLVSDWDIDAIAYTNNLLKGRVVTRSVVKRFVLPKQDLEDDESFSPESLELVELYREEREQTVQPPKWLLERYLPKENVEPIKVQINFADMPNVDEDDPEAKEVE	A-Alj1	ATGATAGATACAAACACTATTGATATTATTAAGGAAGTGTTAGAGAAAAGCGGCGATATAAACGCCGCTTGTATCGCCGCGTCTATCACTCGTCATACGTTTGAAAAATGGTTGCAATTATATCCAACTTTTAAAGATATTGTTACAGAATCTAAAGAGTTTTACAAAAACTGTTTAGTATCTGATTGGGACATCGACGCGATCGCATACACAAACAATCTTTTAAAAGGTCGAGTGGTAACACGTAGCGTTGTTAAACGCTTTGTATTGCCTAAACAGGATTTAGAAGATGATGAAAGCTTTTCCCCGGAGTCATTAGAACTCGTTGAGCTTTACAGAGAAGAACGGGAACAAACCGTACAACCGCCAAAATGGTTGTTAGAAAGATATCTACCTAAA…	P095	489	NA	1	353	841
A-Alj1000109	68674	70032	1	large subunit terminase	MSNFTIVDSYHPKQGNIVARGIAGTQNSILVCGRGFGKSIAGRGIIYTTAIDYRGMIPPQGKTKLFNVIAMPHLNQAKKIHWPPLEYLFTETELSRLVKNINRSEGTIELIGSLPGIALAGLNDDNGNKIRGWSIPRLVIDEMQDVKPGIWASIKPAVDRCLGRVFVSGTPKGKGTPFHRFCKEMTAQGWKYYHYFTEHNPFLPDIDRVLAEARQALTEREFNAEYRASWEDFPGQIFDQLESHHVLPPESFPNNFDSIVMGIDWGDIHPAIAIVGIRDFPYKYYLIDFWQGNPDDTSNSISMDLFIKTCGEYCDKYGIHSTYPDVFQPGNINNIYEFRNSEWPGMRNIVDPDSGDYQRMRTLKVMPSLSMLNRLFSKNRFFIHKDIEDQFRTIVRKQD…	A-Alj1	ATGTCAAATTTTACTATAGTTGACTCATATCACCCAAAACAAGGAAACATTGTGGCAAGGGGCATTGCCGGCACACAAAATAGTATTTTGGTGTGTGGTAGAGGTTTTGGCAAATCAATTGCTGGTAGGGGCATAATCTATACAACAGCAATTGATTACAGAGGCATGATACCGCCTCAAGGAAAAACAAAGCTGTTCAATGTGATCGCAATGCCTCACCTGAATCAAGCTAAAAAGATTCATTGGCCGCCGCTTGAGTATCTTTTCACAGAAACAGAATTGTCCAGACTGGTAAAAAATATCAATCGGAGTGAAGGCACTATAGAGTTAATCGGTTCACTTCCTGGTATCGCTTTGGCTGGATTAAATGATGATAACGGTAATAAGATCAGAGGTTGG…	P001	1359	NA	1	841	2199
A-Hlh1000001	1	1551	1	hypothetical protein	MKSYLPVAKEIEKVAQGGHHLNPEDFLLIRDEESPGVTKKRIEKFAPENYLGAAIRLQRILQKSGVLEIKSESLPGDVIVWENFFNKVDKRNSSLKDFVIDVFTEALINKYCYVQIELNRLDFDTVTEAEADNILANRKPYYFKIPLQSIMVEKCDGDTIEWIKYKRLDKVDDPFGKTIYNMTYVLIDNTHITTWTYYDIILSDSGEISKIWDQRLNYGKGAYRYIDKEKDKADPVSFAHNRGSCPVVRYRMDDSLYMADQVYLAQRMIYGLSMNLFHTAANAGFVQKWIRPYIAGNDTRISKESGGASYIPLPKEALNEIIKKYAESLGDESIIMADFFTFEELAGTSVEMQIGLIERLRNYIFTAILFNNAKFEQSTSDTQSGAAKEIDFYVQNLAL…	A-Hlh1	ATGAAAAGCTACTTACCAGTAGCTAAAGAAATAGAGAAAGTTGCTCAAGGTGGACATCATTTAAATCCTGAAGATTTTTTATTGATTCGGGATGAAGAATCCCCCGGAGTCACTAAAAAGCGTATAGAAAAATTCGCGCCAGAAAACTATTTAGGCGCTGCGATTCGGTTGCAAAGGATTTTACAAAAATCCGGAGTATTGGAAATAAAATCCGAATCGTTGCCCGGAGATGTGATAGTCTGGGAAAATTTTTTTAATAAAGTTGACAAACGTAATTCATCGTTGAAAGACTTTGTTATTGATGTTTTCACAGAAGCGCTGATAAACAAATATTGTTATGTGCAAATCGAATTAAATCGTTTAGATTTTGATACTGTTACAGAAGCGGAAGCTGATAAT…	P002	1551	NA	1	2280	3830
A-Hlh1000002	1735	2433	1	outer membrane protein	MSDNKEGLTDDQTNQDAPENAGAENIDAKLEARFKAFEDKINQALNGVVKKVEKRLTTDKPPESKKPSDSSESDSKKPELDTIQALKSEMEKSRKELEEQLEAERQERAKDKRQVFLSSVDSKISTAIASQKFDDPEAALTVFKSMYGLDNWHPGSSGYVIYKTSEEDEGKTLESLVKDWAKSPVGKRFFNKNLPNGTGLDTPDKTNQTSSKAKTLFEKRKEAKESGFNIKM	A-Hlh1	ATGAGCGATAACAAAGAAGGTTTAACAGACGATCAGACCAATCAGGATGCACCGGAAAACGCTGGTGCTGAGAACATCGACGCTAAATTAGAAGCTAGATTTAAAGCTTTTGAAGACAAGATAAATCAAGCGCTTAACGGTGTGGTCAAGAAAGTTGAAAAGCGATTAACAACCGACAAACCCCCGGAGTCAAAAAAACCTTCTGACAGTTCTGAGAGTGACTCTAAAAAACCCGAACTTGATACCATTCAGGCTTTAAAATCTGAAATGGAAAAAAGCCGGAAAGAGTTAGAAGAACAATTAGAAGCTGAAAGACAGGAAAGAGCAAAAGACAAGCGCCAAGTATTTTTGTCAAGCGTTGACAGCAAAATCAGTACAGCGATCGCTTCACAGAAATTT…	P003	699	NA	1	4014	4712
A-Hlh1000003	2440	3537	1	Chain A, Putative major capsid protein	MPLTNLTPTELLANKAVDYLANSFLVETPMLGLLANRVVNQKQKAIEWGAKVAQGVVGGRTRTGALANDTQGTLKGAALSVPDYYIKHQFDVGKDEIVNSDATGKISAVRDPVATAISDAFDVLAKKINSVLYTASGVADTTNFGIFGLDAAAGTTVANSATGTYAGISKTTFPRWRSIIQGGAVAGTNEALTVNRMTAMLRARRTAGVSYKGNQNQRLIIVTTDQIENDVLRPLYGTVVDNQNVDFTRLDKDLLPYVNYMVKGIPVISDIDCPSNKMYLLNLDKLAIYSFDQSDADQSDGKITYIPLRYVDETGDAPSESTLWVRLANVSDEHPDVLKFELSVALQLVAFDLIDSISVIRDITQ	A-Hlh1	ATGCCTTTAACGAATTTAACGCCTACCGAACTATTAGCAAATAAAGCTGTTGATTATTTAGCAAATAGCTTTTTAGTTGAAACGCCTATGTTAGGTTTGTTAGCTAACAGGGTAGTTAATCAGAAACAAAAAGCTATTGAATGGGGAGCCAAAGTTGCTCAAGGTGTAGTAGGTGGACGTACCAGAACGGGAGCGCTTGCCAATGACACACAAGGAACTTTAAAAGGTGCTGCTCTATCCGTTCCTGATTATTACATCAAACATCAGTTTGATGTTGGTAAAGATGAGATCGTCAACTCTGATGCTACTGGTAAAATCTCAGCAGTACGTGATCCCGTTGCGACCGCTATCTCTGATGCTTTTGATGTATTAGCTAAAAAGATCAACAGCGTTTTATAT…	P004	1098	NA	1	4719	5816
A-Hlh1000004	3682	4161	1	hypothetical protein	VTPGETVTHPLETYYNQFLDGLPISELEEMEIEFIAMCIGFPRSQNNFVNALLDLTTMEIYTIRLSVKEILRLDKLNKESIENRQVTKVEDITMNMNYTSDIKDELVTEVKKLARLLRLPVLDNLYVSYDDVEGQIGANGLLQPLNRSIGSYLTGYTVR	A-Hlh1	GTGACTCCGGGGGAAACTGTGACTCATCCGTTAGAAACATATTACAACCAGTTTTTAGACGGTTTGCCTATTTCCGAACTTGAAGAAATGGAAATAGAATTTATTGCTATGTGTATCGGTTTCCCCCGGAGTCAAAACAATTTTGTAAACGCGTTGTTAGACTTGACAACGATGGAAATTTATACTATACGTTTATCGGTTAAAGAAATTTTGCGACTTGATAAACTCAATAAAGAATCTATCGAAAATCGTCAAGTGACCAAAGTTGAAGATATCACAATGAATATGAATTATACGAGTGATATCAAAGATGAACTGGTAACAGAAGTAAAAAAACTTGCCAGACTGTTAAGATTGCCTGTTTTGGACAATCTTTATGTTAGCTATGATGATGTAGAA…	P005	480	NA	1	5961	6440
A-Hlh1000005	4158	4481	1	hypothetical protein	MIIKSGYLFNDFDTRQVLQNAVDDATAIGVDIVGSRTPVRTGNLLSRWDSEDYLDFDAVSSSIFNDTHYAHFVEVGTSRFSGRFYLLRSLSEIEENFIETVIDKLGD	A-Hlh1	ATGATCATTAAATCCGGTTACTTATTTAATGATTTTGATACCCGTCAAGTGTTACAAAACGCTGTTGATGATGCAACAGCAATCGGTGTGGACATCGTAGGATCACGTACTCCTGTTAGAACCGGAAACCTGTTGAGTCGTTGGGACAGTGAAGATTATTTAGATTTTGATGCGGTATCATCAAGCATTTTTAATGATACACATTATGCACATTTTGTAGAAGTAGGTACATCACGTTTTAGCGGTCGTTTTTATTTGTTGCGATCGCTTTCGGAAATTGAAGAGAATTTTATAGAAACTGTCATAGATAAATTAGGTGATTAA	P006	324	NA	1	6437	6760
A-Hlh1000006	4481	4879	1	hypothetical protein	MLYSNLINVKQKVISIREKLGDPRLKTLVFEYPVGQLFRVTPKLKVSMVPKNMIGLPLDSKANIMISADDYYVKDVSRNVPEGALRTRVWLDPVINDSGEIISGINCRCHVISDKSGLSWDLILRKEREVRI	A-Hlh1	ATGCTTTACTCTAATTTGATAAACGTTAAACAAAAAGTAATATCTATTAGAGAAAAGCTCGGTGATCCGCGTTTAAAAACTCTTGTTTTTGAATATCCTGTCGGTCAACTTTTTAGAGTCACTCCAAAATTGAAAGTGTCGATGGTTCCCAAAAACATGATAGGTTTGCCGTTAGACAGCAAAGCTAACATAATGATCAGTGCAGATGATTACTATGTAAAAGATGTCAGTCGTAACGTACCAGAGGGAGCGCTTAGAACACGCGTATGGTTAGATCCGGTAATAAATGACTCCGGGGAGATCATATCCGGTATTAACTGCCGTTGCCATGTAATCAGCGATAAATCCGGTTTATCGTGGGATTTGATTTTGCGTAAGGAAAGAGAGGTAAGAATATGA	P007	399	NA	1	6760	7158
A-Hlh1000007	4876	5592	1	hypothetical protein	MTKPSLIRQSLLQHINSVVWLQTRGIQEPLKPDVVVNNVAYPPNIVVEKPMNNIEVGFKSQQINDTGDVRQFICECVFDYSLVWVFSRETYKTYHQIPRSQIEDLIVFCQQFVMTSRVDEDITNITVKPSQIIVKPTEDVNSDVSNSSSWSVIANLLFIVEFLSSLDEFSPIDFNKIQPPTWELLDDLDPIVPEQPFTLNGVIISLNKSELPNVRTDEPDTYQLEEIIYIPPSIEEQI	A-Hlh1	ATGACAAAGCCCTCTTTAATACGGCAAAGTCTTTTACAACATATTAACAGTGTTGTTTGGTTGCAAACACGGGGAATACAAGAACCTTTAAAACCTGACGTTGTTGTCAACAATGTTGCTTATCCTCCTAACATTGTTGTAGAAAAACCGATGAACAACATTGAAGTCGGTTTCAAATCACAGCAAATAAACGATACAGGCGACGTAAGACAATTTATTTGCGAATGTGTTTTTGATTACTCTTTGGTATGGGTATTTAGCAGAGAAACATATAAAACTTATCATCAAATCCCCCGGAGTCAAATTGAAGATTTGATAGTTTTTTGTCAACAATTTGTTATGACTTCCAGAGTCGATGAAGACATTACAAACATCACCGTAAAACCTTCACAAATAATT…	P008	717	NA	1	7155	7871
A-Hlh1000008	5617	7137	1	tail sheath protein	MTNFLNGVNIGTPGAYAFYQTTQSRPINVEPFRTCYMVGFASNGANKNVPTRVSSLVDFNNVFVNSESAKSVDLFFKNSQSFGNLYFINVAIPTRFQIVVNAATSGSYSVTINGVTKNLTVTGGATTQTIAADVISAINTDTVLNKEVLAAVGGTSSTVVITSKKPTNTTTAAVTGVIFTLTTITGTVPTAADYVYTINNTFDPALEAGFIIAPEAFSTFNKNDRLSVQVAMENLASAYRYQWAALIDSGAMSEISNTDRAIAEAATYNSVQGHCSYYYPYLINLEDQQVPPSAAVAGIALYRYVIDGFAEPPAGVNFPLKGVKNVAYKVTWEEQNVANPEGVNCILNKENYGIVIWGARTLSADPNIVFISTRVILNIIINTLNRGYDFDIFNAVGGA…	A-Hlh1	ATGACTAACTTTTTAAACGGCGTAAATATTGGAACACCCGGAGCTTACGCGTTTTACCAAACCACGCAAAGCAGGCCGATAAATGTTGAACCTTTCCGTACTTGTTACATGGTAGGTTTTGCTTCTAACGGTGCTAATAAAAATGTGCCTACTCGCGTTAGCAGTTTGGTAGATTTTAACAATGTTTTTGTGAATTCTGAAAGCGCGAAAAGCGTCGATCTGTTCTTCAAAAACTCTCAAAGCTTTGGTAATCTGTATTTTATCAATGTTGCAATCCCTACACGTTTTCAAATTGTTGTAAATGCTGCTACGTCTGGTAGTTACTCTGTCACAATAAACGGTGTGACAAAGAATTTAACCGTCACAGGAGGAGCCACAACACAAACAATTGCGGCTGAT…	P009	1521	NA	1	7896	9416
A-Hlh1000009	7196	7702	1	tail tube protein	MAVSKRPFSINGFAVNLTIGQFIDARYWSKCTKIEKMYNSGEYSDGQSNIIFDLPGAIKYSEVTLSKALSPGDEELINKLIAVNSDPIAYVSVFIQPVYRDGYYTVPQGGKIVLEFCTVSRVTPINEIDTMGSNPAMFELAVKPSRIRSDGGNINWWVEPSFQLASGQ	A-Hlh1	ATGGCAGTTTCTAAAAGACCGTTTTCTATTAACGGGTTTGCTGTAAATTTGACAATCGGACAATTCATTGATGCCCGTTATTGGTCAAAGTGTACCAAAATAGAAAAGATGTACAACAGTGGTGAATACAGCGACGGACAGAGCAATATTATATTCGATCTTCCCGGTGCTATCAAATATTCTGAAGTGACTTTATCTAAAGCGCTTTCACCCGGAGATGAAGAACTGATAAACAAATTGATTGCTGTTAACAGTGATCCTATTGCTTACGTGTCGGTTTTTATTCAACCTGTTTACCGTGATGGATATTATACAGTACCTCAAGGTGGTAAAATAGTATTAGAGTTTTGCACAGTTTCAAGAGTTACTCCTATTAATGAAATTGACACTATGGGTAGT…	P010	507	NA	1	9475	9981
A-Hlh1000010	7718	8158	1	hypothetical protein	MKIQKIEEPINFIMPDDVPEDAIQEQKSVSKDKSDVSESTGVIVDEVVTPSGKDAIAFNSPVTGLRVVVLVPDTLEILAIEREIVKKHPQSGAFEQSIVFLSHLIVEYGDQKGHRLFSFEKLLKFSRKELTVINMIATEFFRLGEI	A-Hlh1	ATGAAAATTCAAAAAATAGAAGAACCTATCAATTTTATCATGCCTGATGATGTTCCTGAAGATGCTATACAGGAACAAAAATCAGTTTCAAAAGATAAAAGCGACGTGTCAGAATCCACGGGTGTGATAGTTGATGAAGTTGTCACACCAAGCGGTAAAGATGCGATCGCTTTTAATTCCCCGGTGACAGGTTTACGAGTAGTTGTACTAGTGCCTGACACACTGGAAATTTTGGCAATCGAAAGAGAGATTGTTAAAAAACATCCTCAAAGCGGTGCTTTTGAACAATCTATAGTGTTTCTATCTCATTTGATTGTTGAATACGGCGATCAAAAAGGTCATAGACTTTTTAGCTTTGAAAAGTTATTAAAATTTAGCCGAAAGGAGTTAACGGTTATT…	P011	441	NA	1	9997	10437
A-Hlh1000011	8148	8360	1	hypothetical protein	VRFDFDENILYYAGYEFDEKQIKKAILSACGGNFTETYFKMLEIPVIKLFEMLNLFVEYQQEQEKLIKSK	A-Hlh1	GTGAGATTTGATTTTGATGAAAACATTTTGTATTATGCTGGATATGAATTTGACGAAAAACAGATCAAAAAAGCGATTTTAAGCGCTTGCGGGGGCAATTTCACAGAGACATATTTTAAAATGTTGGAAATTCCCGTAATAAAGCTTTTTGAAATGTTAAACTTGTTTGTTGAATACCAGCAAGAACAAGAAAAACTTATCAAATCGAAATAG	P011	213	NA	1	10427	10639
A-Hlh1000012	8430	10499	1	tail protein	MANRQHVISVDLRLLTGNFDSSLNYIQGRLNGVFGVVSDNATNSFFGNGGFLSSYLWNQAFNAIQTAGMAAFRAIGNEVKRSIAFQNDLISMATSYKGLLSLSTKEAFGLARQSNIIFQQRNVGLPTFGNFGTQLRSQYGDDFLGAFYDQNNVKASLERTADMIGRTTVLLGSISGVTNYQRTSFLSNFLSDDFKKLSRLEVFRNSPQLQRAFTQQTDAIGGEQGFNALTRKDRLLLLENIAAIAVDDDIIKAYKNSLGGVLSRLGQELFGDIGIFSFTRDLIFGLPNTSILSSITFFMKEIFAPDGVFGLIKPALQGIVDTVLIGTKFILDRTSFIFMGLNALAKVLQPIAPLIYATSSALTVLAAVGLANTIKSAIQGYLISSGAAMLGGKMGAAAM…	A-Hlh1	ATGGCTAATAGACAGCACGTTATTTCAGTAGATTTAAGATTGCTTACAGGAAACTTTGACTCATCTTTAAATTATATTCAAGGACGTTTAAACGGTGTTTTTGGTGTGGTGTCAGATAACGCTACTAACAGCTTTTTTGGTAATGGCGGTTTCTTATCCTCTTATCTATGGAACCAAGCTTTTAACGCCATACAAACGGCAGGTATGGCAGCTTTTAGGGCAATTGGAAATGAGGTAAAGCGTTCTATAGCTTTTCAAAATGATTTAATAAGTATGGCAACATCCTATAAAGGATTGTTGAGTCTATCAACCAAGGAAGCTTTTGGACTGGCTAGACAGTCTAACATCATTTTTCAACAGCGTAACGTCGGATTGCCCACTTTCGGCAATTTTGGTACG…	P013	2070	NA	1	10709	12778
A-Hlh1000013	10492	10617	1	hypothetical protein	MRKSDIIGWTLIIILSIYFLSVSWYEQNKNDSGGDQYERIK	A-Hlh1	ATGCGTAAAAGCGATATCATAGGATGGACATTGATTATAATTTTGTCTATTTACTTTTTATCGGTTTCATGGTATGAACAAAATAAAAATGACTCCGGGGGTGATCAGTATGAACGTATAAAATAA	P096	126	Signal peptide	1	12771	12896
A-Hlh1000014	11171	11518	1	hypothetical protein	MYLTAPATTRIAQSRQIRSFLVGEYGEYYQAWIDSLELQLDQMDKKIQKEMEDADPETPVTYSTVRNRETGEEVTIHITKKNTIYIHFDIDANQTTTKQPVTTMENAREYAKTLL	A-Hlh1	ATGTACTTGACAGCACCAGCAACCACTCGGATCGCTCAATCCCGTCAAATTCGCTCTTTTCTGGTTGGTGAGTACGGCGAATATTACCAAGCATGGATCGATTCGCTAGAACTGCAACTAGACCAAATGGACAAAAAAATCCAAAAAGAAATGGAAGACGCTGATCCGGAAACACCAGTTACTTACAGCACTGTAAGAAATCGTGAAACAGGTGAAGAGGTTACAATTCACATCACCAAGAAAAACACGATTTATATACATTTCGATATCGACGCTAACCAAACAACTACAAAACAACCTGTAACCACAATGGAAAACGCCAGAGAATACGCTAAAACACTTTTATAG	P014	348	NA	1	13450	13797
A-Hlh1000015	11603	14302	-1	valine-glycine repeat protein G1	MQDPIIKVLIGNDTFLLGQDIIDLDFQIGEGKKQNNINFTIFDKDGYYADKYISTSYAQGGIDLPIDFLENPDDAKDTNSASTATEIDSGGNGTVSRSGVFTPRIRAFLDTIASKETAPGTALNIDGYRSVSGSSTLFDESEMVSGGFPRSQGSKNIGRYQFTVIDYNHARSKYPSINNYSPQNQDLLAYFKLQHRNVLPYLLRDDLDNAIDKASYEWASFPGIGKPQGQFNQVQSGTTIASLKSYYESRLAYYRSLEAGSDFQASAPKDTTNNQYQGKEYKTIRTLSNSTTASFYGYNDGFDSSDLTANGERFNPEGITAAHESLPFGTLVKVTWAVNNKSVVVRINDRGAFVRLGRQIDLSYGAAKALSSPGNDAIAAGLLTVKLEVVELRTPIGDN…	A-Hlh1	ATGCAAGATCCTATAATCAAAGTTTTAATAGGCAATGACACATTTTTACTTGGTCAAGACATAATTGATCTTGATTTCCAGATTGGTGAAGGCAAAAAACAGAATAATATCAACTTTACAATATTTGACAAAGACGGATACTATGCTGACAAATACATAAGTACCAGCTATGCTCAAGGCGGGATCGATTTGCCGATAGACTTCCTAGAAAATCCTGATGACGCTAAAGACACTAACAGCGCATCGACAGCGACGGAAATTGACTCCGGGGGAAATGGCACTGTAAGTCGTTCCGGTGTCTTTACGCCTAGAATCCGGGCATTTCTGGACACGATTGCATCAAAAGAGACAGCACCGGGAACCGCTTTAAATATTGATGGTTATAGAAGTGTTTCAGGT…	P015	2700	NA	-1	13882	16581
A-Hlh1000016	14424	15587	1	MAG TPA: restriction enzyme	MNSLLKLSGVYNTDELLKHQNCEESCCKTEHLDIVPEKYLKLVKGGGKLPLNPEYVYWFMGKEGFTALSKYVNNSTPLEFRCSVGHVHSMIFKNFQKGHRCKVCQYEKHGELLKHTHEYVDKYMSDRGYILLSKYVNNHKPIKFRCPVGHVHSMRFGHFQQGHRCKICQDGKRGESRKLTHEYVEKYFEKHGYTLLSKYVNNSTPLKFICPNGHIHSMTFGNFQSGQRCGKCFEETLKGCTNLTSYKIFDRTIQRGSTIPENELREFIEIEILPKIQKFYSSTPSGHHVDHVVPFSFFNHNDKDQIKACWSLYNLRYLPASENFSRNNRFNIDDIEKMPLDKVNHLIAIAVNASNTPKDYKEAIKHLMIFDSVESDYDDYWEEIVKA	A-Hlh1	ATGAATAGTTTATTGAAGTTATCCGGTGTTTATAACACTGACGAGTTACTAAAACATCAAAATTGTGAGGAAAGTTGTTGCAAAACTGAACATCTTGATATAGTGCCTGAGAAGTATTTAAAACTTGTTAAAGGTGGTGGAAAACTTCCATTAAATCCAGAATATGTTTACTGGTTTATGGGTAAAGAAGGTTTTACAGCGCTTTCAAAATATGTAAACAATTCAACGCCGTTAGAGTTTCGTTGTTCCGTGGGACACGTTCATAGCATGATTTTTAAGAATTTTCAAAAAGGTCACAGATGTAAAGTTTGTCAATATGAAAAGCACGGAGAATTACTAAAACATACCCATGAATATGTTGATAAATATATGTCCGATAGAGGATATATACTTTTATCA…	P125	1164	NA	1	16703	17866
A-Hlh1000017	15631	16098	-1	hypothetical protein	MTTQEFVSKNKTIESELLDLLINPNTDDSILTRNRQAIADRDLFDIEWEPGQSLNKLATEYLGDSFAWQIIADANGIDPTKEIDIGAGLKVPDQKALENSIKKYIVNSPQGKQLISDAKQSILNLIGVGDSNTEFSKTLKDCIGKVVNFSFDNTQ	A-Hlh1	ATGACTACACAAGAATTTGTAAGTAAAAACAAAACTATCGAATCTGAACTACTTGATTTGCTTATCAATCCGAATACAGATGATAGCATATTGACAAGAAACCGTCAAGCGATCGCTGACCGCGATTTATTTGATATCGAATGGGAACCGGGTCAAAGCCTTAATAAACTTGCCACAGAGTATCTTGGTGACAGCTTTGCATGGCAGATCATCGCTGACGCTAACGGCATAGATCCTACAAAAGAAATTGATATAGGTGCAGGTTTGAAAGTGCCTGACCAAAAAGCGCTGGAAAATTCTATCAAGAAATATATCGTAAATTCACCACAAGGAAAGCAACTTATCAGTGATGCCAAGCAAAGCATTTTGAATTTAATTGGTGTAGGTGATTCTAATACA…	P016	468	NA	-1	17910	18377
A-Hlh1000018	16097	16378	1	hypothetical protein	MEKSELFERIYNSHDTAKQMITENDYKFTWVGREFYIKVDGYEKIYFKLELYDPETDQYYATKRSDNPSMFVTSWIDARILRALVIDKHAFIV	A-Hlh1	ATGGAAAAATCAGAATTGTTTGAAAGAATTTACAACAGCCATGATACGGCGAAACAAATGATAACGGAAAATGATTATAAATTCACATGGGTAGGACGTGAATTTTACATAAAAGTTGACGGATATGAAAAGATATACTTTAAATTGGAATTGTACGATCCTGAAACAGATCAATATTATGCTACTAAAAGAAGTGACAATCCCTCTATGTTTGTTACTTCATGGATCGATGCTAGAATATTACGTGCTTTGGTAATAGATAAACACGCTTTTATTGTCTAG	P017	282	NA	1	18376	18657
A-Hlh1000019	16368	17216	-1	hypothetical protein	MSRFLKNRAVINGLPEIKNPGKYQHCYLIEYTDKNNVKQSATENKNKQKQGFPVYLFMMNPENISYTLPINYQEIAIPFTSKNHVNYSNGGNIVMSMSNLILDTMDEKRSLQPLIDRLIALREPTIQSGLKKHPKILAFKWGSNTFAPCVLTNISFDVIRWIDGFPTKARMSMTLKEVQAPSSDSKALAEAKKKVKVETVQNGNLKKGLTEKQLIDGSKVATEYLKKNISFQPRSIQNILSDPKSVIKIDKDTGQVSLFNGAGEFTALVGTYNGDIFTPTRQ	A-Hlh1	ATGTCCAGATTTTTAAAAAATCGTGCTGTTATCAATGGATTGCCAGAGATCAAAAATCCTGGTAAGTACCAACATTGTTATTTAATAGAATATACGGATAAAAATAATGTAAAACAATCGGCAACGGAAAACAAAAATAAACAAAAACAAGGCTTTCCGGTGTACTTATTCATGATGAATCCGGAGAACATCAGTTACACATTACCAATAAATTATCAAGAAATTGCCATCCCTTTTACGTCTAAAAATCATGTAAATTACTCTAACGGCGGTAACATCGTTATGAGTATGTCAAATCTGATACTTGATACGATGGATGAAAAGCGATCGCTACAGCCGCTTATAGATCGCCTAATTGCTTTGCGGGAACCAACAATACAAAGCGGTCTGAAAAAACAT…	P018	849	NA	-1	18647	19495
A-Hlh1000020	17725	18027	1	hypothetical protein	MIIDVKVKTVKKPVVKINLNNLNEIIGIYDDPEKASKHAKRMYEKHGYKKELITCKWETIENIKNSLEKQIEIGLEYQKKFNSREGEQEIKMMRDFIKNY	A-Hlh1	ATGATCATAGATGTTAAAGTAAAAACCGTTAAAAAACCTGTTGTAAAAATAAATCTAAACAATTTAAATGAAATCATAGGTATTTACGATGATCCTGAAAAAGCATCCAAACACGCAAAAAGAATGTATGAAAAACACGGATACAAAAAAGAGTTGATTACTTGTAAATGGGAAACAATAGAAAACATTAAAAATTCATTGGAAAAACAAATAGAAATAGGTTTAGAATACCAGAAAAAATTTAATAGTAGAGAAGGAGAGCAAGAAATAAAAATGATGAGAGATTTTATAAAAAACTATTGA	P106	303	NA	1	20004	20306
A-Hlh1000021	18276	18473	1	hypothetical protein	MKHAQVLIILIVAVMVVTTTIYNGFAPYIKKAIAYGKERYYYRKLAAKNRKEFWQAMTRKNFMGV	A-Hlh1	ATGAAACACGCTCAAGTACTTATCATTCTAATTGTCGCTGTTATGGTCGTTACAACCACTATTTACAACGGCTTCGCGCCATACATCAAGAAAGCGATCGCGTACGGTAAAGAGCGTTATTATTACCGTAAATTGGCGGCAAAAAATAGAAAAGAGTTTTGGCAAGCTATGACACGTAAAAACTTTATGGGGGTATGA	P019	198	1 TMP	1	20555	20752
A-Hlh1000022	18470	18625	1	hypothetical protein	MMHIGNTKTVTFPVTKKDFNRLKLLAKSQNISVSQLVEKWVKDKTDETYTT	A-Hlh1	ATGATGCACATAGGCAACACAAAAACCGTTACTTTCCCAGTAACCAAAAAAGATTTTAATAGACTAAAGTTACTGGCAAAGTCTCAAAATATTTCAGTTTCTCAATTAGTAGAAAAATGGGTGAAAGATAAAACAGATGAAACCTACACCACGTAA	P107	156	NA	1	20749	20904
A-Hlh1000023	18606	18782	1	hypothetical protein	MKPTPRNIQRICKALLEHQMALNSVESGYTATFNGYVILSGSTLQEISDQLNLYNMGK	A-Hlh1	ATGAAACCTACACCACGTAACATTCAACGGATATGCAAAGCATTGTTAGAACATCAAATGGCACTGAACAGCGTTGAAAGTGGTTATACAGCAACTTTTAACGGATACGTTATTTTAAGCGGTTCCACGTTGCAAGAAATCAGTGATCAACTCAATTTATACAACATGGGAAAATGA	P020	177	NA	1	20885	21061
A-Hlh1000024	18779	18913	1	hypothetical protein	MINRYTLTFFFVACFLIGLLAGRVTNEVPKVWSDFDVMLQQENE	A-Hlh1	ATGATAAACCGTTACACACTTACTTTCTTTTTTGTCGCTTGTTTTTTGATCGGTCTGCTGGCCGGTCGAGTCACTAACGAAGTGCCAAAAGTTTGGTCAGATTTTGACGTGATGTTACAACAGGAAAACGAGTAG	P097	135	Signal peptide	1	21058	21192
A-Hlh1000025	19015	19275	1	hypothetical protein	MVKRYKATQHINGVSPVTNVKRKKSLEPAKMYKISQMDAYKIMQQNFLNDSGEYYTMLDCIRRWRSEEEKGSESFNSFLDLLQALR	A-Hlh1	ATGGTTAAACGTTATAAAGCAACACAACACATAAACGGTGTTTCGCCTGTCACAAACGTTAAAAGAAAGAAAAGTTTAGAACCTGCAAAAATGTATAAAATTTCTCAAATGGACGCATATAAAATAATGCAACAAAACTTTTTAAATGATTCAGGTGAGTATTACACGATGTTAGATTGTATAAGACGTTGGAGATCAGAAGAGGAGAAAGGATCAGAAAGTTTTAACAGCTTTTTAGATTTGTTACAAGCGTTAAGATAA	P108	261	NA	1	21294	21554
A-Hlh1000026	19402	20292	-1	exonuclease RNAse T and DNA polymerase	MITNIKTYNEAIASLADLSISGSCVFLDTETIGSFAVPVMVELAVTDLQKRQLFNSYIQPWYMPDHIELKNNCDWEEIIVADTFEQHYDAIKSALADRDILIYNKSFDIRVIREVCEFYAVPLPFDLERVYCLMSLRSAIVGEKLPLEGKHTAYDDVCVMVDLFKELCKHEPIDAIGGDNLAEIIIKYDQVCAEIKHLESLKSEYAEHIKSKLLSDVATGDKTSVEIVHNKKLIKFSGRVDAIAKVDDPSLVPEKYFKSTFDRFAAAKDFKDSGEIAPGVTYERSEILGKIVISDK	A-Hlh1	ATGATAACCAACATCAAAACATACAACGAAGCGATTGCATCTTTGGCGGATCTGTCAATATCTGGGAGTTGTGTTTTTCTGGACACGGAAACTATCGGTAGTTTTGCCGTTCCTGTGATGGTTGAATTAGCTGTTACAGATTTACAGAAACGTCAATTGTTTAACAGCTATATCCAACCGTGGTATATGCCCGATCACATCGAGTTAAAAAATAACTGTGATTGGGAAGAGATCATCGTTGCTGACACGTTTGAACAACATTACGACGCGATTAAAAGCGCTTTGGCAGATCGTGACATTTTGATATACAATAAATCTTTTGACATCCGAGTGATTCGGGAAGTATGCGAATTTTACGCCGTACCGCTACCATTTGACCTTGAACGTGTGTATTGTCTG…	P022	891	NA	-1	21681	22571
A-Hlh1000027	20384	20710	-1	hypothetical protein	MNTIQILESWLKAEKEIDYLKDVIEEIKRSKMTNDLEEEYKKVLVHNRELRSELASHKKAIEEWCSNYYQLQVEKDYLTQTIDKKNEQCEHLLKLNKELTERLAKFQS	A-Hlh1	ATGAACACTATACAAATACTTGAATCTTGGTTAAAGGCCGAAAAAGAAATAGATTATTTGAAAGATGTTATCGAAGAGATTAAACGATCAAAAATGACTAACGATTTAGAGGAGGAATATAAAAAAGTTTTGGTACATAATAGAGAATTACGATCAGAATTAGCATCACATAAAAAAGCTATTGAGGAGTGGTGTTCCAATTATTACCAGTTACAAGTAGAAAAAGACTATCTGACGCAAACCATCGATAAAAAAAATGAACAATGTGAACATCTTTTAAAATTAAATAAAGAACTCACAGAAAGACTTGCGAAATTTCAATCGTAA	P109	327	NA	-1	22663	22989
A-Hlh1000028	20822	21226	1	hypothetical protein	MNELPPKIDLSYCLSDFQLEILNDICNGLRVRQMAEKHYKSIGSINHAIQSIYAKLDCNNYIGLFKILYGFSPAPDRLEINPQANGIGEIIRLHIKGLKASQISQRTGNSRNYIYNVINSYKAIKKLESDIGEN	A-Hlh1	ATGAACGAATTGCCCCCAAAAATCGATTTAAGCTATTGTTTGTCTGATTTCCAGTTAGAGATACTTAACGACATTTGCAACGGTCTGAGAGTAAGGCAGATGGCGGAAAAGCACTATAAATCTATTGGATCGATCAATCATGCCATACAGTCCATTTATGCAAAATTGGACTGCAATAATTACATCGGTTTATTCAAAATATTGTATGGTTTCTCTCCTGCACCAGATAGGCTTGAAATTAACCCACAAGCCAACGGTATCGGTGAAATAATACGATTGCATATAAAAGGTCTGAAAGCGTCTCAAATCAGCCAGCGAACGGGAAACAGTAGGAATTATATATACAACGTGATCAACAGTTACAAAGCCATAAAAAAACTTGAAAGTGATATCGGTGAA…	P024	405	NA	1	23101	23505
A-Hlh1000029	22175	22987	1	valine-glycine repeat protein G1	MIVDEFSSVYECLLYCYRMVKRSEQLNGRRVFPILSVVTNNNDPEGRRRIKIADPLFSNLIESNWIRPIRVSQNQDNPLPQIDQMVIVWFVDGDSEKGYYLPIINDANPSRDKDDPVNDSAVRIEGNNTLTVDKNDSLSIGGNQTVAIAGEQNTNVDGNLIENIGGDIDQNVTGKIEVRSESTILIEADGTIIIKNDSGAFISLGGNGEVLIQDSQGRKIRLGGAFNSTWDLNGLPMQFINATSITIANKQIATVGAVDSRGDTIVSKGW	A-Hlh1	ATGATAGTTGATGAATTTTCTAGTGTTTATGAATGTTTGTTGTATTGTTATCGGATGGTCAAGCGGTCAGAACAATTAAACGGCCGTCGCGTGTTTCCTATCCTTTCGGTTGTAACAAACAACAACGATCCAGAAGGACGTAGACGCATTAAAATCGCTGATCCGTTGTTCAGCAACTTAATAGAATCAAATTGGATACGACCGATCAGAGTTTCTCAAAACCAAGATAATCCGTTACCACAAATCGATCAAATGGTTATCGTCTGGTTTGTTGACGGTGATAGCGAGAAAGGTTATTACCTGCCTATCATCAACGATGCCAACCCCTCACGCGATAAAGATGATCCGGTGAATGATAGTGCTGTAAGGATTGAAGGTAATAACACACTGACAGTTGAT…	P025	813	NA	1	24454	25266
A-Hlh1000030	23033	23170	-1	hypothetical protein	MKENLLVLLMFCLLMVAGVGTFETIKDHIKQTVWSPNYPETEILK	A-Hlh1	ATGAAAGAAAATTTACTAGTTTTATTAATGTTCTGTCTTTTAATGGTTGCGGGAGTGGGAACATTTGAAACCATAAAAGACCACATAAAACAGACGGTTTGGTCGCCAAACTATCCAGAGACAGAAATACTAAAATAA	P126	138	Signal peptide	-1	25312	25449
A-Hlh1000031	23222	23683	-1	hypothetical protein	MVKNVWQALYDAIAGNNDVNDDGWTDYQMSTESSEEYQARILAKAESDSHLRKRTNNQLNDPDEGLKQANIEQARREGLISKEEYNRELKKLRKDKWNNTGIDDNYVLCEDGIHRKPSEILQQNQEKKEEPKRTRKVWRMGDDHCMHEVEEEY	A-Hlh1	ATGGTCAAAAATGTATGGCAAGCGCTTTATGATGCTATTGCAGGTAACAATGATGTGAATGATGACGGATGGACAGATTACCAAATGTCTACGGAGTCATCAGAAGAGTACCAAGCAAGAATCTTGGCGAAAGCTGAGAGTGACTCTCATCTGAGAAAACGTACCAACAATCAACTAAACGATCCCGATGAAGGACTGAAACAAGCAAACATTGAACAAGCCAGAAGAGAAGGACTGATAAGTAAAGAAGAATACAATAGAGAACTGAAAAAATTGCGAAAAGACAAATGGAATAATACAGGAATTGATGATAATTACGTGCTGTGTGAGGACGGCATACACAGGAAACCATCGGAAATATTACAGCAAAATCAAGAAAAGAAGGAAGAACCAAAAAGA…	P026	462	NA	-1	25501	25962
A-Hlh1000032	23874	24203	-1	hypothetical protein	MFSLTINIYNGDQGSATAEINTKLDGVINKMSELGDKLTQLEELTQVEVQEFQTIILKIGDLRSTVEAQTAEIARLNELVASGGAVTPEELQRLDNLIASVSAIVNPDV	A-Hlh1	ATGTTTTCACTCACCATTAACATTTACAATGGTGATCAAGGTTCTGCAACAGCAGAGATCAACACCAAACTAGACGGAGTAATAAATAAAATGTCTGAATTAGGCGATAAGCTTACTCAATTGGAAGAACTTACTCAAGTAGAAGTACAAGAGTTCCAAACTATCATCCTGAAAATTGGCGATCTTCGTTCTACCGTAGAAGCTCAAACGGCAGAGATCGCACGATTAAACGAATTGGTTGCTTCCGGTGGTGCTGTTACTCCTGAAGAATTACAACGTCTGGACAATTTAATCGCCAGCGTTTCAGCTATCGTCAATCCTGACGTATAA	P029	330	Signal peptide	-1	26153	26482
A-Hlh1000033	24274	24612	1	hypothetical protein	MYVYPPRIINGTLYKSSDLAEYTRGKILQTLSIVRGELVADPFFGVPLRLFSSVKDYQSDVAKIEVILKEEIPEADFIVTGDISNNGLVTLTVYWAYLGTENIETFEIDINF	A-Hlh1	ATGTATGTATATCCGCCTAGAATAATAAACGGTACTTTATATAAATCTTCAGATTTAGCAGAATATACACGCGGTAAGATTTTGCAAACGCTGTCAATAGTTCGGGGTGAGTTAGTAGCCGATCCGTTTTTTGGCGTTCCTTTGCGGTTGTTTTCCAGTGTCAAAGATTATCAATCAGACGTTGCAAAAATCGAAGTTATTTTAAAAGAAGAAATACCAGAAGCTGATTTTATTGTGACTGGCGACATTTCAAACAATGGGCTGGTAACACTAACGGTTTATTGGGCTTATCTGGGAACTGAAAATATTGAAACTTTTGAAATTGATATAAATTTTTAA	P030	339	NA	1	26553	26891
A-Hlh1000034	24655	25827	1	baseplate wedge protein	MTTDLNAPQLVIDDYEGLIIDSLVHTNIVSNGEFTDLDPSGFMRPFAGTMAYAGSELLYKANLASIAAAKSFFKNVLGVPEDAGTKATTTLQFGLSASLSTDFIVPINFQVSDLSGTLRFYTVGNLVIPAGATFGTVEAIAEDIGEKYNVSANFIDQYSTPLTYLQYVTNIRPASNGRSGETIDNLIERCAQIIRIRNPVSALDFEQLAQLTMGDGSRCKAVGLLGINKIVTDPQPGVVHLFLLDVNGNPADPVLISTVGATLQPRIMLGTRLLISPMEVLSIELELIALSDSSKTFQQLANDVLSALEIFFDPVNLTPGEPVLIEEVKFAIRSVGGLSISYLQMNDNAINVPMPNQWTIPRFSYIGFELTDSEGTVYRDNVITVTNPEE	A-Hlh1	ATGACAACTGATTTAAACGCGCCACAATTAGTTATAGACGATTATGAAGGACTGATCATCGATTCTTTGGTACACACCAATATTGTAAGCAATGGTGAATTTACTGATCTAGATCCTTCCGGTTTCATGAGACCTTTTGCTGGGACAATGGCCTATGCGGGATCTGAACTGTTATACAAAGCAAATTTAGCATCAATAGCGGCTGCAAAGTCTTTTTTTAAGAATGTTCTGGGAGTACCTGAAGACGCTGGAACCAAAGCCACAACCACTTTACAGTTTGGTTTATCCGCCTCATTGTCCACAGATTTTATAGTACCTATAAATTTTCAGGTTTCCGATTTATCAGGCACTTTAAGATTTTACACCGTTGGAAATTTGGTTATCCCTGCCGGGGCTACT…	P031	1173	NA	1	26934	28106
A-Hlh1000035	25827	26402	1	tail collar protein	MSKDAFVAWNVDRRPIYSRMPKEQVGTSYHDYIATDWLTAYWDKIFVECYDKLEDLPRQFNPLECDEEYLDFLAPLCGWTAPYWSGDYPPESKRILLANSYSLIWKDKGSLTVLSFVLNALFINHRIFVPGSFILGISQVSEDTLGAAGWEFEILLPRNYPENGYEFRLTRKIAELFSPLWCRYQIRYENI	A-Hlh1	ATGAGTAAAGACGCTTTTGTGGCTTGGAACGTTGACAGACGGCCTATTTATTCCCGTATGCCTAAAGAGCAAGTGGGAACCTCTTATCATGACTATATAGCTACTGATTGGTTAACGGCATACTGGGATAAAATTTTTGTAGAGTGCTACGACAAACTTGAAGACTTGCCGCGCCAATTTAATCCATTAGAATGTGATGAAGAGTATTTAGACTTTCTTGCGCCGTTGTGTGGATGGACTGCGCCTTATTGGTCAGGAGATTATCCCCCGGAGTCAAAACGGATTTTATTAGCTAATTCTTATTCGCTGATATGGAAAGATAAAGGCAGTTTAACCGTACTGTCATTCGTTTTAAATGCGTTGTTTATCAATCATAGAATATTTGTTCCGGGATCGTTC…	P032	576	NA	1	28106	28681
A-Hlh1000036	26405	27646	1	hypothetical protein	MTNIVGRIGFLTTGKLGIKLRGVLIDESTTPNTTYLPGIETFFDITSNLLTSVSYPQTETQNITATFSIYAVDGVDPVFPALLSFDAIVPNVASVEFDVLAPTGVVNNQLDTSALRIAKVIANDPALAQKVAGAPYPRGAYSASETYLYGEMVSYFGKNYISKSLSPIINILPTVTDSWYELVITLPPEVSVIATGSDTDYGSGWNGSLLVPTQNAVYDKIVTVDTAIATVNTNIATLGSAKADLSYVNSELSADQALINALSSGKADLSYVNTQLGSKANLNSPTFTGNPTAPTPPTNDSDTSLATTAFVNSLLSSRFTYVDLGGGRYRILFQGGFALAFGSHVVTPNGSSQATVPFNFTYATTLMVVCVNGDNTATTNHFTISNTNSSGFIVFTGGY…	A-Hlh1	ATGACTAACATTGTAGGACGGATAGGTTTTTTGACTACTGGTAAATTAGGTATAAAATTGCGTGGTGTTTTGATAGACGAAAGCACCACACCAAACACCACTTATTTACCTGGCATTGAGACTTTTTTTGATATTACATCTAACCTGCTAACAAGCGTTTCTTATCCCCAAACGGAAACGCAGAACATAACAGCGACTTTCAGTATTTACGCGGTTGATGGTGTTGATCCGGTTTTCCCTGCTTTGCTTTCTTTTGATGCGATCGTGCCAAATGTCGCATCAGTAGAATTTGACGTTTTAGCTCCCACCGGAGTAGTTAACAATCAATTAGATACTTCAGCTTTAAGGATCGCCAAAGTAATCGCCAACGATCCAGCATTAGCTCAAAAAGTTGCTGGC…	P033	1242	NA	1	28684	29925
A-Hlh1000037	27698	28837	1	tail collar protein	MVRKVFNDGDILYAEDVNTIGQPFVDGQDLLGHGLKVDDNSLDDSPNQIKARFYAWYNRFLVTIQSGLTLSVTQGSISVSGNIISFPPQTINAINNSNSFVWIGKTDVDPAIALRVSQTLPEVCIPLARIIAASGSITSVTDLRDVSVDVLPPSIPDAVPVGSTIISLIPPTSPAPAGYLELLNTPQNVSRITYSSLFAEWGTYYGAGDGSTTFGVPGTGGRYPRLVGTGLEVGSMGGNNQITIPANALPTHQHGIPATTHTHGVNQTPHGHGVSQVPHGHGMVDSGHSHGVPFGAASDSGSTAFDTGGNPYNNGIGTTQSQSNVSVSPGNANIGIEGSNANISIQSASTGLTATGNAGNGAAFQHDQPYLIFRVFVKV	A-Hlh1	ATGGTACGTAAAGTTTTTAATGACGGTGATATTTTATATGCTGAAGATGTCAACACTATCGGCCAACCGTTTGTTGATGGTCAGGATCTATTAGGCCATGGTCTAAAAGTTGATGATAACAGCTTAGACGATTCACCGAATCAGATAAAAGCTCGCTTTTATGCGTGGTATAATCGCTTTCTAGTGACTATACAAAGCGGTTTAACTCTTTCAGTCACACAAGGTAGTATCAGCGTTTCAGGTAACATTATAAGCTTTCCGCCTCAAACCATCAACGCCATAAACAATTCTAATAGTTTTGTTTGGATAGGTAAAACTGATGTAGATCCGGCGATCGCTTTAAGAGTTTCACAAACTTTACCGGAAGTCTGTATACCATTGGCGCGGATAATCGCCGCA…	P034	1140	NA	1	29977	31116
A-Hlh1000038	28885	29031	-1	hypothetical protein	MKQYKVVWIENAKIRQYSTNNQNKALMLAEYLDLMCVWCRFYDNDQII	A-Hlh1	ATGAAACAATACAAGGTTGTGTGGATAGAAAACGCCAAAATAAGGCAGTACAGCACAAACAATCAAAACAAAGCTTTGATGTTAGCTGAATACTTGGATCTCATGTGTGTATGGTGCAGATTTTACGACAATGATCAAATAATATAA	P120	147	NA	-1	31164	31310
A-Hlh1000039	29054	29314	-1	hypothetical protein	MKSKLETLSSIKQSSYSLCQRKFKINKEDVKEFTKWMIKLCVSDDPDCSTTDLKYREPWARGYYTLLNTEQDGRANFVKKILKIKY	A-Hlh1	ATGAAAAGCAAACTAGAAACACTTAGCAGCATCAAACAATCCTCATATTCTTTATGCCAACGTAAATTCAAAATAAACAAAGAAGATGTTAAAGAGTTTACAAAATGGATGATAAAGCTTTGTGTCAGCGACGATCCGGACTGCTCAACAACGGATCTCAAGTATAGGGAACCTTGGGCTAGAGGTTATTACACACTGTTAAACACCGAACAGGATGGTAGAGCGAATTTTGTCAAAAAGATTTTGAAGATTAAGTATTAA	P119	261	NA	-1	31333	31593
A-Hlh1000040	29479	29901	-1	hypothetical protein	MTRLTFAKVSEEFQSMGYTLKKEKRGYSCEVSDKFQNLKDAQEWLYNQVSLAKESEIEENEEFQPVIYVFSVRNCREEHVKKIIDTMSTDIGEECVKQDEYGLIQALVYELDPENGDNQSLYISEWVDKFPCIALVKTIY	A-Hlh1	ATGACACGCTTAACATTCGCTAAAGTTTCAGAAGAATTTCAATCAATGGGATACACTCTCAAAAAAGAAAAAAGAGGTTACAGTTGTGAAGTATCTGATAAATTTCAAAATTTAAAAGATGCTCAAGAGTGGTTATACAATCAAGTGTCTTTGGCAAAAGAATCTGAGATTGAAGAAAATGAAGAGTTTCAACCAGTGATTTATGTATTTAGCGTGAGAAATTGTCGAGAAGAACACGTCAAAAAGATAATTGATACCATGAGTACGGATATAGGCGAAGAATGTGTAAAACAGGATGAATACGGACTAATACAGGCTTTAGTATACGAATTAGATCCAGAAAACGGGGATAATCAAAGCTTATACATATCGGAGTGGGTTGATAAATTCCCATGTATA…	P035	423	NA	-1	31758	32180
A-Hlh1000041	30033	31970	-1	DNA polymerase	MKLFEYKIENGTITIDESSLDLFSYYEEPIPDWEPTADIKPFNELTRLGVDIETTGLNPENNRIMLIGIYNESGKYHIFHDEDERKMLISFIGVLNRKKPDILEGFNHIEFDLKFIIKRCEKLRIPHPFTIAQKETTIRTAQQFGKPFTFFHIWLKYEDAPRSQHTAVIDLYPAVLQWDFVKRKLTKYTLKQNVLQMGLRKEARTELSYSQMMEEWENREENNLTLLKEYLQFDLEDTKLLGDFLIPAIYYQKLFIPDWKLQSIATAGFGSKWNDILKREYCLEPLPVSDTRKHFEGGLTDSIYGFFENVIKIDVASLYPSIMLTYGVCSSKDHRKVMLSILKYLKTQRIKAKAIANDVKAEPKIKLDAEHKSGSDKLFLNAGYGFLSTQGVEFNDFVA…	A-Hlh1	ATGAAATTATTTGAATACAAGATAGAGAATGGAACCATCACCATTGATGAAAGTTCTTTAGATTTGTTCTCGTATTATGAGGAACCGATCCCAGACTGGGAACCAACAGCAGATATAAAACCTTTCAACGAGCTTACACGTCTAGGTGTAGACATCGAAACCACTGGATTAAATCCTGAAAACAATCGCATCATGTTAATCGGGATTTATAACGAATCAGGGAAATATCACATTTTCCATGATGAAGATGAAAGAAAAATGTTAATATCTTTCATCGGCGTGTTAAATCGTAAAAAACCTGACATTCTTGAAGGTTTCAATCATATTGAATTTGACTTAAAATTCATTATCAAGCGTTGTGAAAAACTGAGAATTCCTCACCCGTTCACAATTGCCCAA…	P037	1938	NA	-1	32312	34249
A-Hlh1000042	32066	32254	-1	hypothetical protein	MGNYETMKKLDQAIDYLESAINNLESIENTNRTLEVIADQMLVQLNALQHQQKIYKDAWENE	A-Hlh1	ATGGGAAATTACGAAACAATGAAAAAGCTTGACCAAGCTATTGACTATCTAGAATCAGCTATAAATAATTTAGAGTCAATAGAAAACACTAACAGAACTTTGGAAGTAATAGCCGATCAAATGTTGGTACAATTGAACGCATTACAACACCAACAAAAGATTTATAAGGACGCTTGGGAAAACGAATGA	P038	189	NA	-1	34345	34533
A-Hlh1000043	32267	32482	-1	hypothetical protein	MSTSDIDIEIYGEWENDPSKFWNWCDHCDRITTVISATDPYIDELYKDDDEIDNTESNWCRVCYCKRKEEI	A-Hlh1	ATGTCAACAAGCGATATAGATATCGAAATTTACGGAGAATGGGAAAACGATCCATCAAAATTTTGGAATTGGTGCGATCATTGCGATCGCATCACCACGGTTATTTCCGCCACCGATCCTTACATCGATGAGCTTTACAAAGATGACGACGAGATTGATAATACAGAATCTAACTGGTGTAGGGTTTGTTATTGTAAACGTAAAGAAGAGATATAA	P039	216	NA	-1	34546	34761
A-Hlh1000044	32516	32716	-1	hypothetical protein	MNKVTALSIRRESIEKLVYYNRDAKRALENGKVPESNVNIVRKKIARNNVIVAKFIEDVIFASELN	A-Hlh1	ATGAATAAAGTTACAGCGCTTTCAATCCGTCGAGAATCAATAGAAAAGCTTGTGTATTACAATAGAGACGCTAAAAGAGCATTAGAAAATGGTAAAGTACCTGAAAGCAACGTTAACATTGTTAGAAAAAAAATAGCTCGTAACAATGTTATAGTTGCCAAGTTTATCGAAGATGTGATATTTGCCAGTGAGTTAAATTGA	P040	201	NA	-1	34795	34995
A-Hlh1000045	32709	34124	-1	helicase	MIELREYQQEQVNKLNSATVNTCIQSPTGTGKSVVIKAFTERVSDSGGKVAIIAPNRELVQNIAGYFPAIATTAYTGVKPDLSKSIFVSTYKSYAKYFKAFDHDLMLVDEGYHLPSPTIKRIMEQSKGLTHCLTATPNRLDGAGLFPQMRDLHLSPQVSWFINQGFLSDYELITSECPLFKSSDGSDDLSSQSKLFGSTPECFKTVQMYHEQCYNQRAIVFVSGQEHGQKLVNMFNDSGVYAEFVTAKTDKKHRDCCLELFKLGHLKVLININLFTEGVNIPECENVFLCRFTYSTALYLQMVGRLLRVAPGVNKTLFDLSGNVWYHGTPKSTFEWSIHGQPWRESDNRSSVNFKCEKCDTDLINKKFVKHSTTVCCLECGHVNYLEPPEEKDTKHRFL…	A-Hlh1	ATGATAGAACTCAGAGAATATCAACAAGAACAAGTCAACAAACTAAATTCAGCAACCGTCAATACCTGCATTCAATCCCCGACGGGAACGGGTAAGAGCGTCGTTATAAAGGCATTCACAGAACGTGTAAGTGACTCCGGGGGTAAAGTTGCTATAATCGCTCCTAACCGCGAATTGGTGCAAAATATCGCCGGATACTTTCCAGCGATCGCGACAACAGCTTACACCGGAGTCAAACCGGATTTATCAAAAAGTATTTTTGTTTCGACATACAAAAGTTATGCAAAATACTTTAAAGCTTTTGACCATGACTTGATGTTAGTTGATGAAGGTTATCACCTGCCATCACCGACGATTAAACGTATTATGGAACAGTCCAAAGGATTGACCCATTGTCTG…	P041	1416	NA	-1	34988	36403
A-Hlh1000046	34121	34336	-1	hypothetical protein	MDIIFFETDCVYCFYSDYETLCNLGKVLESVNLDPSWYETEALNVQSEKDLQALINAYCDLMNIKPNWNKK	A-Hlh1	ATGGATATCATTTTTTTTGAAACTGATTGTGTTTATTGTTTTTACTCGGATTATGAAACACTGTGCAACCTTGGCAAAGTTTTAGAATCTGTTAATCTTGATCCGTCATGGTATGAAACGGAAGCGTTAAACGTCCAATCTGAAAAAGACTTACAAGCGCTGATAAACGCTTATTGTGATTTGATGAACATTAAACCTAATTGGAACAAAAAATGA	P042	216	NA	-1	36400	36615
A-Hlh1000047	34338	34541	-1	hypothetical protein	VKQYIFEKYKQSSVRQEVKQLTLQGLTVVVAYFRDGESFQIMSKHETKGQAWRTIGSKRNCFIVERG	A-Hlh1	GTGAAACAATATATATTTGAGAAATACAAACAGTCAAGTGTAAGACAAGAAGTAAAACAACTTACTTTGCAAGGTTTGACGGTGGTTGTAGCTTATTTTAGAGACGGTGAAAGCTTTCAAATCATGTCAAAACATGAAACAAAGGGGCAAGCTTGGCGAACAATCGGAAGCAAAAGAAACTGTTTCATAGTTGAAAGGGGTTAA	P118	204	NA	-1	36617	36820
A-Hlh1000048	34555	34893	-1	hypothetical protein	MWIEETRKFINSFTNFEELINALHDLEKCYDPDPKNKGFRIFATLEESYDFNGGLFVSNGDISGFLIDVRNEKGAIIVRFRESGRMGLRRTESKKIKTHGWIEPWTNETVNI	A-Hlh1	ATGTGGATCGAAGAAACTAGAAAATTTATCAACTCTTTCACTAACTTTGAAGAACTGATCAACGCTTTACATGACTTAGAAAAGTGTTATGATCCAGATCCTAAAAACAAAGGTTTTAGAATTTTTGCAACATTGGAAGAATCTTATGATTTTAATGGCGGTTTATTTGTTAGCAATGGGGATATATCAGGATTTTTAATCGATGTTCGTAATGAAAAAGGTGCTATTATTGTACGCTTTCGTGAAAGTGGGCGTATGGGTCTAAGACGCACTGAATCGAAAAAAATCAAAACGCACGGATGGATCGAACCTTGGACAAATGAAACGGTGAATATTTAA	P117	339	NA	-1	36834	37172
A-Hlh1000049	34952	35122	-1	hypothetical protein	MKDQYLGKQFTWNQTTYTVKRMMGDNNKAYVCKPLKGSADTRERWFMIDELNELIK	A-Hlh1	ATGAAAGATCAGTATTTAGGCAAACAGTTCACATGGAATCAAACCACATACACGGTTAAACGTATGATGGGTGATAACAACAAAGCTTATGTTTGCAAACCCTTGAAAGGTTCCGCAGACACCAGAGAACGATGGTTTATGATCGATGAATTGAACGAGCTTATCAAGTAA	P116	171	NA	-1	37231	37401
A-Hlh1000050	35251	36333	-1	hypothetical protein	MQTVFLGTCWDSVKSIDILAQAGYNIEKETKGIIKLEHLLPEEQNIFNGLISLLDLKYGEDVTNVGLSIFNEDWQYVYFTYPAVGIGDKDQLGLMIGCSNATEKSAFLPMVYTPGKDDESGDYHLVTPKGKKVKVGLTSIPGSDNKTRHYLMIKNKSFIFNIPFKSASDDLSTGFVNSAFDDGTFHECCKSFMKSGVKFSTMFKKSFLDGYFPENGVILVLGKGKISESEQYGRSSIWEVINSSHPDLVVLDATKETPGEMELKDAGTIFCSSACSASKHLFAGKSGQDPYIIWVKARNPNNINHLPLHDGYQIALVPPKFKAKFPDMLEKAKQIALGNFSANMKAISGSVVEDPALADF	A-Hlh1	ATGCAAACAGTATTTTTGGGTACTTGTTGGGATTCCGTGAAATCTATTGACATTTTAGCTCAAGCGGGATACAACATCGAAAAAGAAACCAAAGGTATTATAAAGCTTGAACATCTGTTGCCAGAGGAACAAAACATTTTTAACGGTTTAATATCTTTACTTGATTTAAAATATGGTGAAGACGTGACAAACGTAGGTTTGTCAATTTTTAATGAAGATTGGCAGTATGTGTATTTCACTTATCCTGCCGTTGGTATAGGCGACAAAGATCAGCTAGGATTAATGATCGGTTGTTCCAACGCTACCGAAAAATCTGCATTTTTGCCAATGGTTTACACACCTGGTAAAGACGATGAAAGCGGCGATTATCATTTAGTTACACCTAAAGGCAAAAAAGTC…	P044	1083	NA	-1	37530	38612
A-Hlh1000051	36480	38063	-1	hypothetical protein	MKKPLGGFLKSEIDNKYIEARKKLLLIKTLGIVSVGLFTAAVANPKQPKYDLVGQLGFSSLFSLVAAYICKENDDLFTQYDTFVKMNREHKKNEISLNFGKAMIVNEVANEIDLASRLQNLPAPAQIRYINKYALQGLLTPVIDPPESSYSVFSADENGKYGISLDSDLRELERKTEIDLSWIDSAFVNSSKIVVGAKGSGKSVYLRYEAARWLIENPSGYLLIVDPHYDRRVESKHWLCDLDQKIVMKKFLAKSKETRNHGEENEWRGYLYHLGNAWIELQRRIDDSGDDFDDDTIPDYRPVKIIIDELENIKSTCNEAEFKQILKLIDCIQNEGRKYRYEITVGMHGLKKETTGLDSTTVAQMNWFLFEKACYDPTTKFPADFDSREIKEISKTIST…	A-Hlh1	ATGAAAAAACCGCTAGGGGGTTTCTTAAAATCGGAAATCGATAATAAATATATAGAAGCTCGTAAAAAGCTTTTACTCATCAAAACTTTGGGTATAGTGTCTGTCGGTTTATTCACGGCGGCGGTAGCCAACCCAAAACAACCAAAATATGATTTAGTCGGTCAACTTGGATTTAGTTCTTTGTTTTCTCTGGTAGCTGCATATATTTGTAAAGAAAATGACGATCTCTTTACACAATATGACACGTTTGTAAAAATGAATCGTGAGCATAAGAAAAACGAAATATCGCTTAATTTCGGTAAAGCGATGATAGTAAACGAAGTGGCAAACGAGATTGATTTGGCATCAAGGTTGCAAAATTTGCCAGCACCAGCACAAATACGTTATATCAATAAATAT…	P045	1584	2 TMP	-1	38759	40342
A-Hlh1000052	38060	38251	-1	hypothetical protein	MYYYHVAFQSYDQGEHIGREMLFLTEKITSSNYDNCLKVMETVLKNKYGYESVITHFQLLEDV	A-Hlh1	ATGTATTACTATCACGTAGCTTTCCAAAGTTATGATCAGGGTGAACATATTGGAAGAGAAATGTTATTTTTGACTGAAAAAATAACATCATCCAATTACGATAATTGTTTGAAAGTGATGGAAACGGTTTTAAAAAATAAATATGGTTACGAATCTGTTATAACTCATTTTCAATTATTGGAGGACGTATGA	P115	192	NA	-1	40339	40530
A-Hlh1000053	38293	38568	-1	hypothetical protein	MKYFLRFGTYTAIATTTLLGVINPQFRLICGVFVAGYLLYAGSDTYKIAIEHYEEHRRYYKDSFIYAISRNALDIGCFCLSLAVAVFLAIA	A-Hlh1	ATGAAATACTTTTTACGCTTTGGTACATATACGGCGATCGCTACAACCACTTTACTCGGTGTAATCAATCCACAATTCAGATTGATTTGTGGTGTGTTTGTTGCAGGTTATCTTTTATACGCTGGTAGCGATACGTATAAAATTGCTATAGAACATTACGAAGAACATCGACGTTACTATAAAGATTCGTTCATCTATGCGATTTCTCGCAATGCTTTAGATATTGGATGCTTTTGTCTGTCGTTGGCGGTTGCTGTTTTTTTGGCGATCGCTTGA	P046	276	3 TMP	-1	40572	40847
A-Hlh1000054	38568	38762	-1	hypothetical protein	MYHYHVDFTCGKIKNYARFTLKRKILVGTYDVCMMEIRNRIKAAYKAGFDEIVIIHSFQLLEHN	A-Hlh1	ATGTATCATTATCACGTTGACTTTACTTGTGGAAAAATCAAAAATTACGCAAGATTCACATTAAAGCGTAAGATACTTGTCGGTACTTACGATGTTTGTATGATGGAAATACGCAACCGGATAAAAGCAGCTTATAAAGCTGGTTTTGATGAAATTGTTATCATTCACAGTTTTCAATTATTGGAGCATAACTGA	P047	195	NA	-1	40847	41041
A-Hlh1000055	38879	39331	-1	hypothetical protein	MFGDNHSYNGSNTNGSAIIKSGYDVAALAGDTEKLKPTFQNALNIGSLKDANEKGIYQAAKDAGTLRGLGVMFKNYSREKLNTAKAALSLRNAALNHQKQAAGLELQWQQGSARHLQGMSETLMQLGIVQENHAGFTTYCDTADRLLKGL	A-Hlh1	ATGTTCGGTGACAATCATTCTTACAACGGATCAAACACAAACGGTTCGGCAATTATCAAATCCGGTTATGATGTTGCCGCGCTTGCAGGTGACACGGAAAAGCTCAAGCCAACTTTCCAAAACGCTTTAAACATTGGCAGTTTGAAAGATGCGAACGAAAAGGGTATATACCAAGCAGCCAAAGACGCTGGAACGTTACGCGGTTTGGGGGTAATGTTCAAAAATTACAGCCGTGAAAAACTTAACACGGCCAAAGCCGCTTTAAGTCTGAGAAATGCAGCGTTAAACCATCAAAAACAAGCGGCCGGATTAGAGTTACAATGGCAACAAGGATCGGCAAGACATTTACAGGGAATGTCAGAGACTTTAATGCAGCTTGGTATCGTCCAAGAAAACCAC…	P048	453	NA	-1	41158	41610
A-Hlh1000056	39321	39503	-1	hypothetical protein	MQQAEYYRLKASQETKSVDEQTTVIVVSFMLLLTFMIWSVSNKIGNSFKQQNTTEIIYVR	A-Hlh1	ATGCAACAGGCTGAATATTACAGATTAAAAGCCAGCCAAGAAACAAAAAGCGTTGATGAACAAACAACGGTAATAGTAGTTTCGTTCATGCTTTTACTTACTTTTATGATTTGGTCTGTAAGTAACAAAATTGGTAACAGTTTCAAACAACAAAACACAACGGAGATCATTTATGTTCGGTGA	P049	183	1 TMP	-1	41600	41782
A-Hlh1000057	39523	39714	-1	hypothetical protein	LVEKNIKKDRDNAIAILCYTVITVMIFYTIGIIVYGGQRTGTDKNTNGYERIFEDRGENLPSI	A-Hlh1	TTGGTTGAAAAAAATATCAAAAAAGATCGTGATAACGCGATCGCTATTCTTTGTTACACGGTTATCACGGTCATGATTTTTTATACAATAGGGATTATCGTTTATGGAGGACAAAGAACAGGAACAGATAAAAATACAAATGGATACGAAAGGATTTTTGAAGATAGAGGGGAGAATCTCCCCTCAATCTAA	P114	192	1 TMP	-1	41802	41993
A-Hlh1000058	39707	40288	-1	hypothetical protein	MKNSNVPLIRTRLHRKGVTGLSADEIKTALDNNNDDIDATVSELFSKHQTAIATTESDSGVSPESEEDFKSLLKINNNDDETVAMIKSEAGSMGLTIPVNHINDIATSVKQSRTYQSDKLKAIKSALIAYIDWQHEQSSNEAVETIKEVKEHATNKAVEFNNKMVGELSEFFRQSEQNSAEFADELIKALSVG	A-Hlh1	ATGAAAAACTCAAACGTTCCTTTAATTCGTACCAGACTGCACCGTAAAGGTGTAACAGGATTGTCAGCAGACGAGATTAAAACAGCTTTAGATAACAACAATGATGACATTGACGCTACAGTGTCAGAATTGTTTTCCAAGCATCAGACAGCGATCGCAACTACCGAAAGTGACTCCGGTGTTTCCCCGGAGTCAGAAGAGGATTTTAAATCGTTGTTAAAAATTAACAATAACGATGATGAAACCGTTGCAATGATTAAATCAGAAGCGGGATCGATGGGTCTAACTATCCCCGTCAATCACATCAATGATATTGCAACTTCTGTCAAACAGTCTCGTACATACCAAAGCGACAAATTAAAAGCGATTAAAAGCGCTTTAATAGCTTATATAGACTGG…	P050	582	NA	-1	41986	42567
A-Hlh1000059	40423	40938	-1	hypothetical protein	MTITFRNKHAKNPRADKKVTPMRERIENWINNNQSMFNGEPKLQLHQIKRIESELLANYGDVSNITDEVLENYFKLKLYFPRTPYVKILIDKAIKLTKQLDEDKDDMIDAETLYSTITKISEFADSTIYAWFKRLNANFCTIGVYHTNTVVMVVYLALVKDAKDSKKLPMV	A-Hlh1	ATGACTATCACATTCAGAAACAAACACGCCAAAAACCCCCGTGCGGATAAAAAAGTTACGCCGATGCGGGAAAGGATCGAAAATTGGATCAACAATAATCAGTCCATGTTTAACGGTGAACCAAAATTACAGTTGCATCAAATCAAAAGGATTGAAAGCGAATTATTAGCCAATTACGGCGATGTATCAAATATTACCGATGAAGTTCTGGAAAACTATTTCAAATTGAAATTGTATTTTCCCCGTACACCATACGTTAAAATTTTGATCGATAAAGCTATAAAACTCACTAAACAGCTAGATGAAGACAAAGACGATATGATCGATGCTGAAACACTGTACAGTACCATCACAAAAATTTCAGAATTTGCCGATTCAACTATATACGCATGGTTCAAA…	P051	516	NA	-1	42702	43217
A-Hlh1000060	41363	41530	-1	hypothetical protein	MEDLSKEIKALKDSIMSLEKELSEKKQKLSELKNQQKIYITELVQELPQVIYDPE	A-Hlh1	ATGGAAGATTTATCCAAAGAAATAAAAGCATTAAAAGATAGCATTATGTCTCTTGAAAAAGAGTTGTCAGAGAAAAAACAAAAATTATCAGAGTTGAAAAACCAACAGAAAATTTACATCACTGAATTAGTACAAGAATTGCCCCAAGTAATTTATGATCCAGAATAA	P113	168	NA	-1	43642	43809
A-Hlh1000061	41697	41951	-1	hypothetical protein	MIQFLINAFLFYVTVAFLIFLVYTYFEFQNSFPLFTFYIYPKMREDFKEMIREMNRDYDLQKRSIIFFWPLYLTLFAFFGIANR	A-Hlh1	ATGATTCAATTTCTGATAAACGCTTTTTTGTTTTACGTGACTGTTGCTTTTTTGATATTTCTTGTGTACACATACTTTGAATTTCAGAACAGTTTTCCTCTTTTCACCTTTTACATTTATCCAAAAATGAGAGAAGATTTTAAAGAGATGATACGAGAAATGAATAGAGACTATGATCTACAAAAAAGAAGCATAATCTTTTTCTGGCCTTTATATTTGACTCTATTTGCATTTTTTGGAATAGCAAATAGATAG	P055	255	2 TMP	-1	43976	44230
A-Hlh1000062	41948	42190	-1	hypothetical protein	MIDFLLDVLKVLFIIYMVVFVTTFVMIESIFVIIGDDFDLTPEQRKYAKRWDNHRKHWEAFKIACKWPKILINAMMDGEL	A-Hlh1	ATGATTGATTTTCTTCTGGATGTTTTAAAAGTGCTTTTCATCATTTATATGGTGGTTTTTGTAACAACATTTGTTATGATTGAATCGATTTTCGTGATTATTGGCGATGATTTCGATTTGACCCCAGAACAGCGAAAATATGCTAAACGATGGGACAATCATAGAAAGCACTGGGAAGCGTTTAAAATCGCTTGCAAGTGGCCTAAAATACTAATAAATGCGATGATGGATGGTGAATTATGA	P056	243	1 TMP	-1	44227	44469
A-Hlh1000063	42297	42914	-1	DNA N-6-adenine-methyltransferase	MVSHHGSCLKNEHYTPRAVFDYIHCVSGEIDLDVASDEIGNRAARAKKYFTKDDDGYTKNWEGNIVFCNPPGRTKDTMHLPGQSEWFLKMVNQHRAGNFVEGWFIGYSIELLCKVGYNAFDYCFCVPQPGKLTGNTHMVSGMGRIMFDAYDPETDERVRQKSPMHGNVIIYLPPMNHKFSNVQIVKFLNVFKKLGAVHISTDYQK	A-Hlh1	ATGGTTTCACATCACGGATCATGTCTCAAAAATGAACATTACACACCACGAGCTGTTTTTGATTATATACACTGTGTAAGTGGTGAAATAGATTTAGACGTGGCAAGCGATGAAATAGGCAACAGAGCGGCCAGAGCTAAAAAGTATTTTACGAAAGATGATGACGGATATACAAAAAACTGGGAAGGTAATATTGTATTCTGCAATCCACCGGGAAGAACTAAAGACACGATGCACTTACCAGGACAATCCGAGTGGTTTTTAAAAATGGTTAATCAACATCGTGCCGGGAATTTTGTTGAAGGATGGTTTATCGGTTACAGTATTGAATTGTTGTGCAAAGTTGGTTACAACGCTTTTGATTATTGTTTCTGTGTTCCACAACCAGGAAAATTGACA…	P057	618	NA	-1	44576	45193
A-Hlh1000064	42953	43336	-1	hypothetical protein	MNTVEKLYILADAIKNETDKIQKRGMSDDAAIALLGAKIQDDQNYIIEMLSERLNDRLSVVKNVLKRITLTLKYVQLIENLKKEWAVLVDQAGNIALDKNFKSTNPDETFDTAMRKICISHIEKEGF	A-Hlh1	ATGAACACTGTAGAAAAGCTTTACATATTAGCCGATGCTATAAAGAACGAAACGGACAAAATACAAAAACGTGGAATGTCGGACGATGCGGCGATCGCGTTGTTAGGAGCGAAAATACAAGACGATCAAAATTACATCATAGAAATGTTGAGCGAAAGATTAAATGATCGTTTATCGGTCGTTAAAAATGTTTTGAAGCGGATCACGTTGACCTTAAAATATGTTCAATTGATTGAGAATCTAAAAAAAGAATGGGCAGTTTTAGTCGATCAAGCTGGTAATATAGCGCTAGACAAAAACTTTAAATCTACCAACCCAGACGAAACATTCGATACAGCAATGAGAAAGATTTGCATAAGTCATATTGAAAAAGAAGGTTTTTAA	P112	384	NA	-1	45232	45615
A-Hlh1000065	43400	43609	-1	hypothetical protein	MNLITDTEYTVTVNAELDLTLTFKFVSVEIDEKEICFVFERDGKTYKFVENQVRQLLNLPKNPITRRGF	A-Hlh1	ATGAATTTGATCACCGATACAGAATACACGGTTACGGTAAATGCTGAACTGGACTTAACTTTAACTTTCAAGTTTGTGTCAGTGGAAATAGACGAAAAAGAAATATGTTTTGTTTTTGAAAGAGACGGAAAAACATACAAATTTGTCGAAAACCAAGTAAGACAGTTGTTGAATTTGCCAAAAAATCCAATAACTAGAAGAGGTTTTTAA	P111	210	NA	-1	45679	45888
A-Hlh1000066	43664	44437	-1	hypothetical protein	MTRLTVKSVTEYAQANGYELEVRNGTKDKYHIRVAGECPETTMFSATYRTLNEIMLCINEGYLLDGQSEPVEFEVVESYLNDSGELPTFQEVATAIAPYGYELHRNNGQFFTESKAPYIYFKDGESEYALHVTYFLDRIVESVEENYYFKINNQRFQQISSELSKIGDHSGENLTGNETLSDRLSMLEKRLINAVEQRRANVRQICSEIGQMVKNWSSGQGFGNTVKRVTRKVARHAKRFYTILTERVSPKGHVGIF	A-Hlh1	ATGACACGCTTAACAGTCAAATCGGTTACAGAATACGCTCAAGCTAACGGATACGAATTAGAAGTAAGAAACGGTACAAAAGATAAATATCATATTCGTGTTGCTGGTGAGTGTCCAGAGACAACAATGTTTTCAGCTACTTACAGAACGCTCAATGAGATCATGCTTTGCATCAACGAAGGTTATTTACTCGACGGTCAAAGCGAACCAGTGGAATTTGAAGTTGTTGAAAGTTATCTCAATGACTCCGGGGAACTACCAACGTTTCAAGAAGTCGCTACGGCGATCGCTCCTTATGGTTACGAATTGCATCGCAACAATGGACAGTTTTTTACAGAATCGAAAGCTCCTTACATCTATTTTAAAGATGGTGAGTCTGAATATGCGTTACACGTTACA…	P059	774	NA	-1	45943	46716
A-Hlh1000067	44596	44832	-1	hypothetical protein	MKNIKDLPSVNNEYSIELISGCWYNAVIDSKFNVVIKLRFYSISITETKSLVYLFFDEKEEGHFLNTNEIKQYRLKLI	A-Hlh1	ATGAAAAACATTAAAGATTTGCCATCTGTGAATAATGAGTACTCTATAGAACTCATTAGTGGGTGTTGGTACAACGCAGTAATTGACAGTAAATTCAACGTGGTCATCAAGCTTAGATTTTATTCTATAAGCATCACAGAAACCAAAAGTTTGGTGTATCTTTTCTTCGATGAAAAAGAGGAGGGACATTTTTTAAATACGAATGAGATCAAACAATACAGACTGAAGTTGATTTAG	P060	237	NA	-1	46875	47111
A-Hlh1000068	44834	45370	-1	hypothetical protein	MKTTFIFNDVQVNLTDAFKKRIRLFAQMVYKLDYCPTIRQLEKLFGLKLVKPRGIGANLRQYHLNWMTAYKTIETDLEVSEENQYQFATRMDVELKAAIAKYNLSGSGKLTSSTEYRFDVYSRNAKGLLVCIGYFHSDFLNKKLAISFTSNGKRQAIVNVGHACHKMIGVFQKQPVGV	A-Hlh1	ATGAAAACCACATTTATTTTTAACGATGTTCAAGTAAATTTGACGGACGCTTTCAAAAAAAGAATCAGATTGTTTGCACAAATGGTTTACAAATTAGATTACTGTCCGACAATTAGACAACTTGAAAAATTGTTCGGTCTGAAATTGGTTAAACCGCGTGGGATCGGTGCTAATTTGCGCCAATACCATTTAAATTGGATGACAGCTTATAAAACGATTGAAACCGATTTAGAAGTGTCTGAAGAAAACCAATATCAATTTGCCACACGTATGGATGTTGAATTAAAAGCGGCTATCGCTAAATATAATTTGTCTGGTAGCGGTAAACTTACCAGTAGCACCGAATATCGTTTCGACGTTTATAGCAGAAATGCCAAAGGTTTGCTGGTTTGTATAGGA…	P062	537	NA	-1	47113	47649
A-Hlh1000069	45484	45702	-1	hypothetical protein	MVSTYFAIYIDDQNIADYDYQIVNSCIQLNIGDKIEIKTKKLTMRVEVFEIENIIDIWEVDSFERCYKCKPV	A-Hlh1	ATGGTTTCAACGTATTTTGCTATTTACATAGATGATCAAAATATTGCAGATTATGATTATCAAATTGTAAATTCTTGCATACAGTTAAATATTGGAGATAAAATCGAAATAAAAACTAAAAAATTAACAATGCGTGTTGAAGTGTTTGAAATTGAAAACATAATAGACATTTGGGAAGTAGATTCTTTTGAAAGATGCTACAAGTGTAAACCTGTGTAA	P110	219	NA	-1	47763	47981
A-Hlh1000070	45722	46153	-1	hypothetical protein	MKIDVEDFRKIVDEWNCDLVVNKNHTRSHKYFVIDRKTTEILVSTSVLEDAQRRFTTVCDRWKKKYIDSARLTDIKDGGFSYSGNVVINGKDVTIYYNLFSDEWYCLEIPRRFQSFMSAYKYALDMFDKSTTEENMNSIKQTA	A-Hlh1	ATGAAAATCGACGTTGAAGACTTTAGAAAAATTGTTGATGAGTGGAACTGTGATCTAGTTGTCAATAAAAACCATACTAGAAGTCACAAATATTTTGTGATAGATCGTAAAACCACAGAAATACTTGTCAGCACTTCCGTACTTGAAGACGCTCAAAGACGGTTTACAACCGTGTGCGATCGCTGGAAAAAGAAATACATAGATTCAGCACGTTTGACAGATATTAAAGATGGGGGATTTAGTTATAGTGGAAACGTTGTAATAAACGGCAAAGACGTTACCATCTATTACAATTTGTTTAGTGATGAATGGTACTGTTTAGAGATTCCCAGACGTTTCCAATCGTTTATGAGTGCTTATAAATATGCTTTGGATATGTTCGATAAATCGACAACAGAA…	P063	432	NA	-1	48001	48432
A-Hlh1000071	46286	46522	-1	ASCH domain protein	MRHELKTVNPWFTDVIEGRKDFEVRKNDRGYSVGDLLVLREWTGNNYTARKVEKVVKYVLRGEDFPDGVKPGYVVLGF	A-Hlh1	ATGAGACACGAATTAAAAACGGTAAATCCTTGGTTCACTGACGTGATTGAAGGACGTAAAGATTTTGAAGTAAGGAAAAATGATAGGGGTTATTCGGTTGGTGATCTGTTAGTATTACGGGAGTGGACAGGAAACAACTACACAGCGAGAAAAGTCGAGAAAGTTGTAAAATATGTTTTACGTGGTGAAGACTTCCCAGATGGTGTAAAACCTGGATACGTTGTGTTAGGTTTCTGA	P064	237	NA	-1	48565	48801
A-Hlh1000072	46533	46880	-1	hypothetical protein	MSEPMDTIAIRDDIINRFEKTLEDFPHVRKRLIKNYFEQCFQHEENARILKVIVTIEKNVMDFQVYSTIVKEYVDFLPGLEDIMNHSLLNNRVPILISFFPNENYELAFPVSIEV	A-Hlh1	ATGAGTGAACCAATGGACACGATTGCAATACGTGACGATATTATCAATCGATTTGAAAAAACTTTAGAAGATTTTCCTCATGTTAGGAAACGATTGATAAAAAATTATTTTGAACAATGTTTCCAGCATGAAGAAAACGCAAGAATACTAAAAGTAATTGTCACCATTGAAAAAAATGTGATGGATTTTCAAGTTTACTCGACCATAGTAAAAGAATACGTCGATTTTTTACCGGGACTGGAAGATATTATGAATCATTCGCTGTTGAACAACCGTGTTCCAATACTGATCAGCTTTTTCCCGAATGAGAATTATGAGTTAGCTTTTCCTGTAAGTATAGAGGTTTAA	P065	348	NA	-1	48812	49159
A-Hlh1000073	46877	47440	-1	hypothetical protein	MTDKYLYYSTGSIKKINPHWVSEQLAAEGYTMLSTYESINKPFKILCPNGHHNKISFNNWNQGKRCSKCSHNNVYRNDGAKSFFAKYGYTIIGGDYKNNRTPMKYVCGKGHINTVTLSALKHYGSTCPYCKGTRTSIEDVRKFLSDRGCELLRPLIEFKHEYKVVYKNPNGEIKQKYWRTIKTTKKL	A-Hlh1	ATGACTGACAAATATTTATATTATTCGACAGGATCGATCAAAAAAATCAATCCTCACTGGGTATCCGAACAGTTAGCGGCCGAAGGTTATACAATGCTTTCAACTTATGAAAGCATTAATAAACCTTTTAAAATTCTTTGTCCAAATGGACATCACAACAAAATAAGTTTTAACAATTGGAATCAGGGAAAACGTTGCTCAAAGTGTTCTCACAACAATGTTTATAGGAACGATGGGGCAAAATCTTTTTTTGCGAAATACGGTTATACGATAATCGGAGGAGATTATAAAAATAACCGTACTCCGATGAAATATGTATGTGGGAAAGGACATATCAATACTGTCACTCTTTCAGCTTTGAAACATTACGGATCGACTTGTCCGTACTGTAAAGGAACA…	P066	564	NA	-1	49156	49719
A-Hlh1000074	47475	47879	-1	hypothetical protein	MGKGIGLSGYRGVRKHYTLWKSVLPDETILGLYSTPLEAAIVRERFLHEHRDEFKEVERYLNGVDLAPGVTINTYRKPKKVKPQKHQPRYGKYVYRNRHHNSFFVRIGKYQSKCFPFHSYAIAHRDEYLQNNLK	A-Hlh1	ATGGGTAAAGGTATCGGACTATCAGGTTATAGAGGCGTAAGGAAGCATTACACCTTATGGAAATCGGTTTTACCAGACGAAACTATATTGGGTTTGTATTCAACGCCGTTAGAAGCGGCCATAGTCAGAGAACGTTTTTTGCATGAACATCGTGATGAATTTAAAGAAGTTGAGAGATATTTGAACGGAGTTGATCTTGCCCCCGGAGTCACGATTAATACTTACAGAAAACCTAAAAAAGTCAAACCCCAAAAGCATCAACCGCGTTACGGCAAGTATGTTTATCGTAACCGACATCATAATAGTTTTTTTGTAAGGATTGGGAAATATCAATCAAAATGCTTTCCTTTTCATTCTTATGCAATTGCTCACAGGGATGAATATTTGCAAAACAATTTA…	P067	405	NA	-1	49754	50158
A-Hlh1000075	47903	50956	-1	DNA primase	MSRQKKESGADNTGKQKNEQSIEVDIIINNSENFVNFLYLQHAVKLAPGVTKEGLRSSFKMNRNDWKRRKGLENFIESVQSGYIHQAEVTINGEKQYHFGVIDFDFWNKAIAAPIEHTISIEQIKELPSVKKYFYAIQKSISYRENAQNCHGYVVFDQPIQSKEEFQKCLKALVEIVKQDIAKLLGLEYNTKLELGVDGCTANNPSQVTFASLEPVTVMDAIASVETLLKLSALFEIKVSRSASVAPESIPDGKNDSVSGRLTVTERVLKHIHDNLFLTVFNGDAGLLYSLHDENQRWTPRTDLEVGEVCRLEGNNPFSGTNNSGSSFMVIYAENELPRFWDKSGSFERLLKDGYSSNHGTFLDYYFHIYREEFPGVELENGQFPSGFFRVLVNHVCDH…	A-Hlh1	ATGAGCAGACAAAAAAAAGAATCCGGCGCTGACAACACCGGAAAACAAAAAAACGAACAGTCAATCGAAGTTGATATAATAATAAACAATTCTGAAAATTTTGTCAACTTTTTATATTTACAACACGCTGTAAAGCTTGCCCCCGGAGTCACTAAAGAGGGGTTGAGAAGCAGCTTTAAAATGAATCGTAACGATTGGAAACGCCGGAAAGGATTGGAAAACTTTATAGAGTCTGTACAGTCGGGATATATTCACCAAGCAGAAGTTACGATCAATGGTGAGAAACAGTACCATTTCGGCGTAATAGATTTTGATTTTTGGAACAAAGCGATCGCTGCACCGATTGAACACACGATCAGCATTGAACAAATTAAAGAATTACCCAGTGTTAAAAAGTAT…	P068	3054	NA	-1	50182	53235
A-Hlh1000076	51189	51869	-1	hypothetical protein	MLLETKKELPDIITLFPGLEEREYFQHTETKEFWFHASNVCKVLGFTNTTTALALHCDDDEKLIEMLHGRQTWFVSEAGLYGLILGSKKPEAKKFKRWLKHDVLPKLRSTGGYIMPSATTEQLQALQTEIAELQESRKEMLYSNRKVFEHLLNNRLDRKNIDYPDICNLIQANFGIYLSGSECRRVIEKLRVVAKGSPTRSDLLRSVEIAYPKKYQEIINRDLMVE	A-Hlh1	ATGCTTCTTGAAACCAAAAAAGAACTACCGGATATAATTACACTTTTTCCGGGTTTGGAAGAAAGAGAATATTTTCAACACACTGAAACCAAAGAGTTTTGGTTTCACGCTTCCAATGTATGTAAAGTATTAGGTTTTACTAATACTACTACGGCGTTAGCGTTACATTGTGACGATGATGAAAAACTGATAGAAATGTTACACGGTAGGCAAACATGGTTTGTTTCTGAGGCGGGTTTATATGGTTTAATCCTTGGTTCTAAAAAGCCAGAAGCCAAAAAATTTAAAAGATGGTTAAAGCATGATGTACTCCCAAAGCTTAGAAGTACTGGTGGTTATATAATGCCTTCTGCCACTACTGAACAATTACAGGCATTACAAACAGAGATTGCAGAATTG…	P069	681	NA	-1	53468	54148
A-Hlh1000077	52548	53189	1	thymidylate kinase	MNAFHNEKPYAGTFIVFEGVDGAGKTTQANKAYEYLTGLKIPTILTCQPGGTQFGANLRAWLKSDVELTPRLQFLGMILDRLEHVNNVIRPKLLEGFVVLCDRFTWSTIAYQGALGLHRDIIDTMNLFATSDGCNIDPDLILLYDTELQIARERMKSDDRYEKMNDKFYTEVVKTYNRLGYYWDNCRVIDGRNSIDQVWEKTKNHIDKTLKLC	A-Hlh1	ATGAACGCTTTTCACAATGAAAAACCCTACGCTGGCACTTTTATAGTTTTTGAAGGTGTAGACGGTGCAGGGAAGACCACACAGGCTAACAAAGCTTATGAATATCTGACAGGATTGAAAATCCCTACTATCCTCACTTGTCAGCCTGGAGGAACACAGTTTGGAGCTAATTTAAGAGCGTGGTTAAAGTCTGATGTGGAACTTACACCACGTTTGCAGTTTTTAGGGATGATTCTGGACAGACTAGAACACGTTAATAATGTAATCCGTCCAAAGTTGCTAGAAGGCTTTGTGGTACTGTGCGATCGCTTTACATGGTCTACAATCGCTTATCAAGGTGCTTTAGGACTGCATCGTGACATCATCGACACTATGAATCTATTTGCGACTTCTGACGGT…	P071	642	NA	1	54827	55468
A-Hlh1000078	53414	53692	1	hypothetical protein	MEVKKIVTDFFQINILNGNDYTFQIGHGNVIDREEYKADNDVWHSYDPYSKTECLLEHISTEFFSQGNTDDIEPLLESLVYQVEEYFTPESL	A-Hlh1	ATGGAAGTAAAAAAGATAGTAACCGATTTTTTCCAGATAAACATACTTAACGGCAATGATTATACTTTTCAAATTGGTCACGGTAACGTAATCGATAGAGAAGAATATAAAGCTGATAATGATGTTTGGCATTCATACGATCCCTACTCAAAAACTGAATGCTTGTTAGAACATATTTCGACAGAATTTTTCAGTCAAGGCAACACTGACGATATCGAACCTTTGTTAGAATCGCTCGTTTATCAAGTTGAAGAATATTTTACACCGGAGTCACTATGA	P121	279	NA	1	55693	55971
A-Hlh1000079	53689	54063	1	hypothetical protein	MKLSKVLLSAAIAFTALTSALPAIAQRPYIVSVQGKTNDGSTLKYDLTSLSNDRGDAVSFTYYIIDKTGDLRQNRGTTFCANRNGWLVPTIDGRGFWVDATSNASNNMLESICRNVFPNWYYRR	A-Hlh1	ATGAAATTATCGAAAGTTTTGTTAAGTGCTGCAATTGCTTTTACAGCGTTGACAAGCGCATTACCAGCGATCGCACAAAGACCGTATATTGTTTCAGTGCAAGGAAAAACTAACGATGGTTCGACATTAAAATATGATTTAACATCGTTGAGTAATGATAGAGGTGACGCTGTAAGTTTCACTTATTACATCATAGATAAAACAGGAGATTTGCGACAAAACAGAGGAACAACTTTTTGCGCTAATAGAAACGGTTGGTTAGTGCCTACAATCGACGGTAGGGGTTTTTGGGTCGATGCAACGTCTAACGCTTCCAACAATATGCTTGAAAGCATTTGTCGTAATGTTTTCCCTAACTGGTATTACAGACGATGA	P072	375	Signal peptide	1	55968	56342
A-Hlh1000080	54060	54497	1	hypothetical protein	MKKTARRIEIDRQRYGDRNNPEYIDLCHRVHKSCGDRCVICTKKSTEIHHAYYLGYKKDSPGVNVFAVCRKCHLSQCHRYNTWLPNHDEPMKSRNTEEFITYLHQRFLFVSQAFNGIKGVMSYYGMPKNKRGNTRSHRVSDKNKK	A-Hlh1	ATGAAAAAAACTGCAAGACGAATTGAAATAGATCGACAACGATACGGAGATCGTAACAATCCTGAATATATCGATTTGTGTCACCGTGTGCATAAAAGTTGCGGCGATCGGTGTGTTATTTGCACAAAAAAATCTACAGAAATACATCACGCTTATTATCTGGGATACAAAAAAGATTCCCCCGGAGTCAATGTGTTTGCCGTATGTAGAAAATGTCATCTTTCACAGTGTCACCGATATAATACTTGGTTGCCAAATCATGATGAACCGATGAAAAGCCGTAATACGGAGGAATTTATAACTTATTTGCATCAAAGATTTTTGTTTGTTAGTCAAGCTTTTAACGGGATAAAAGGAGTAATGAGTTACTATGGAATGCCAAAAAACAAACGCGGAAAT…	P073	438	NA	1	56339	56776
A-Hlh1000081	54499	54591	1	hypothetical protein	LDHYPGTLVQKSAVKRGVDTAIFWLEVLQK	A-Hlh1	TTGGATCATTATCCCGGTACACTGGTACAAAAAAGCGCTGTTAAACGTGGTGTGGACACCGCAATATTTTGGTTGGAGGTTTTACAAAAATGA	P122	93	NA	1	56778	56870
A-Hlh1000082	54588	54947	1	hypothetical protein	MIIGGKNYSEKYLNRLLQIGTFSQHFDKLLEKPDQYYEALKSKPKAIAKLKQLILFPLPSDFLVCCKEFDFLVLRATSKQKIDIVVHYEHRLNRICSLIDKFQLSLTENEKQILKKLGR	A-Hlh1	ATGATCATCGGTGGTAAAAATTACAGCGAAAAATATCTTAATCGGTTGTTGCAAATTGGTACGTTTTCACAACACTTTGACAAATTATTGGAAAAACCTGATCAATACTATGAAGCGTTGAAAAGCAAACCGAAAGCGATCGCCAAACTGAAACAATTGATTTTGTTTCCTTTGCCGTCAGATTTTCTTGTATGCTGTAAAGAATTTGATTTTTTGGTGTTACGTGCAACATCAAAACAAAAAATTGACATCGTTGTACATTATGAACATAGATTAAATAGAATCTGTTCATTGATTGATAAATTTCAATTATCATTGACCGAAAACGAAAAACAAATCCTAAAGAAACTGGGAAGATGA	P074	360	NA	1	56867	57226
A-Hlh1000083	54944	55225	1	hypothetical protein	MSKALRDYQRSSYDMFLTNIIEKVLNAKESHFNFKVYAKSNRQLVKQSFIRCLKKRLIPFTVDGFIFQFMQKTVKITYVYKNPMDRIVYVFSH	A-Hlh1	ATGAGCAAAGCTTTGAGAGATTATCAACGAAGTTCCTATGATATGTTTTTGACAAATATCATAGAGAAAGTGTTAAACGCTAAAGAGTCGCATTTCAATTTTAAAGTTTATGCAAAATCTAATAGACAATTAGTAAAACAGTCTTTTATTAGATGTCTCAAAAAACGTTTAATACCTTTTACAGTTGACGGTTTTATTTTTCAATTCATGCAGAAAACTGTAAAAATAACGTATGTTTATAAAAATCCTATGGATCGGATCGTTTATGTCTTTAGCCATTAG	P123	282	NA	1	57223	57504
A-Hlh1000084	55209	56255	1	DNA-cytosine methyltransferase	MSLAISLFTGVGGFDLGVERAGFKVAVANEIDVKTASTYAQNFKTPMIVEDVRNLTSGNLRDSGGIGQRDVDLVFGGSPCQGFSQAGCRNESDSRNFLIFEYQRIVLDIYPKYFIFENVSELLNKRNETLLNSFISGFDVEGYRIVPIRVLNASSHDIPQSRKRVFMLGYRYDRKAPQYPPESKQRFTLHDAISDLKFANGYEKLKYVDRVPELVYDEPSNYVKDYHKLLGSNIDFTEVIRPITASKFTRHDYQTTKNFLSYPQGYFEKFGRRIKPLYNDVCNTIVTKQRLIHPIYPRYLTVRECARIQSFPDDFNFYPTIEQGQKEVGNAVPPLLGFQLASEILKVL	A-Hlh1	ATGTCTTTAGCCATTAGTTTGTTTACAGGTGTCGGAGGTTTTGATCTTGGTGTGGAAAGAGCAGGTTTTAAAGTCGCCGTAGCAAATGAAATAGACGTTAAAACCGCTTCAACATACGCGCAAAACTTCAAAACGCCGATGATCGTTGAAGATGTTAGAAATTTAACATCAGGAAATTTACGTGATTCCGGGGGGATCGGTCAACGTGATGTTGATCTGGTTTTTGGCGGTTCACCTTGTCAGGGATTCAGTCAAGCCGGATGTAGAAACGAGAGTGACTCTAGAAATTTTTTGATTTTTGAATATCAACGGATAGTGCTTGATATCTATCCAAAGTATTTTATCTTTGAGAACGTTTCAGAGTTGCTTAATAAACGTAATGAAACGCTGTTAAATAGC…	P075	1047	NA	1	57488	58534
A-Hlh1000085	56252	56665	1	hypothetical protein	MKNYTIFDVLQFLEFESGNIDFYDLPKRIRELRYEFWQTSKLLKAWWKLRKLSPNMTNIDWFFSRFFGGHISIGRLTIFGCNAMMYMITCRSKTGTWCFRPPCFNTHWEIWTWGCLYFSPNGTPGHEDAVILWDDKY	A-Hlh1	ATGAAGAATTACACAATTTTTGATGTTTTACAGTTTTTAGAATTTGAATCAGGTAACATTGATTTTTACGATTTGCCCAAAAGAATTAGAGAATTGAGGTATGAATTTTGGCAAACTTCCAAGCTGTTAAAAGCTTGGTGGAAATTGAGAAAACTTTCACCGAACATGACGAATATTGATTGGTTTTTCAGTCGTTTTTTTGGTGGTCACATCTCTATCGGACGCTTGACGATTTTCGGATGTAACGCAATGATGTATATGATCACTTGTAGAAGTAAAACAGGTACATGGTGTTTTAGGCCGCCATGTTTTAATACACATTGGGAGATTTGGACATGGGGATGTCTTTATTTTTCACCAAACGGTACACCCGGACATGAAGACGCTGTTATACTTTGG…	P076	414	NA	1	58531	58944
A-Hlh1000086	56665	56820	1	hypothetical protein	MVIEFTLEQLKAVSKALHAAKNDQHIGLLPQGCTALKKIDKAIANNTSYLA	A-Hlh1	ATGGTAATAGAATTTACTTTGGAACAATTAAAAGCTGTTTCTAAAGCTTTACACGCTGCAAAAAATGATCAGCATATTGGGTTACTGCCCCAAGGATGCACCGCATTGAAAAAGATTGACAAAGCGATCGCGAATAATACAAGTTATTTGGCGTGA	P077	156	NA	1	58944	59099
A-Hlh1000087	56851	57063	1	hypothetical protein	MSLDWLKNHVVNNWKTTLIGLISAFAGFVAFAPDQFPKPLVMLAQYINAGGAVGLGIYAYDSKRKALETR	A-Hlh1	ATGAGTCTTGATTGGTTAAAAAATCATGTGGTTAATAATTGGAAAACCACGTTAATCGGTTTAATATCCGCTTTCGCCGGGTTTGTAGCTTTTGCACCGGATCAGTTTCCTAAACCTCTTGTGATGCTTGCACAATATATTAATGCTGGTGGCGCTGTCGGTTTGGGTATTTACGCTTATGATAGCAAACGAAAAGCTTTAGAAACTAGATAG	P078	213	2 TMP	1	59130	59342
A-Hlh1000088	57123	57542	-1	hypothetical protein	MLTECYSRSSETVKIDGVWREINTYRRCMAGMVENHTYGFMYMGTMPNGWEPSPTDLVMHDVPGNDNFDDTLGYVRFGESSIVNGTVTFFNVYFFGMLNRTVTRSFNVDEFEFMPDGWEPVPGVHKILWEDVKDENVYE	A-Hlh1	ATGTTAACAGAATGTTACTCAAGATCATCAGAGACCGTTAAAATTGACGGAGTTTGGCGAGAGATAAACACGTACAGAAGATGTATGGCCGGTATGGTTGAAAATCATACATACGGATTTATGTATATGGGTACTATGCCTAATGGATGGGAACCATCACCGACTGATTTAGTCATGCACGATGTACCGGGGAACGATAATTTTGATGATACTCTGGGATATGTAAGGTTTGGAGAATCTTCAATCGTTAACGGTACTGTGACATTTTTTAATGTTTACTTTTTCGGTATGCTAAACCGTACAGTAACCAGAAGTTTTAATGTTGATGAATTTGAGTTCATGCCTGATGGATGGGAACCTGTACCCGGAGTACATAAAATACTTTGGGAAGATGTAAAA…	P079	420	NA	-1	59402	59821
A-Hlh1000089	57542	58132	-1	hypothetical protein	MRRLQLNNNGDIEASYERKLIGGLNRWYNFDNNYLKIAIGGGASTANIIRYYHLRVPRPVQINNAAISISTSVTGNFRFGLYDNIVIDNAFTPGNLILDFGEQSTSGTGFKTFPISTLDLPDGDYFGATVSSANTGYMGIVNTSAMGDVFGLPTPGNNATACYTQSFTYGALPLVAAPSGEDTRYPSILFRVVGFL	A-Hlh1	ATGAGAAGATTACAATTAAACAACAACGGTGATATAGAAGCCAGTTACGAAAGAAAATTGATAGGAGGATTAAATCGTTGGTACAACTTTGATAATAATTATTTAAAAATCGCGATCGGCGGCGGAGCATCTACAGCCAACATAATAAGATATTATCATTTGAGAGTACCACGCCCAGTTCAAATAAACAACGCAGCGATATCTATTTCAACCAGCGTCACCGGAAATTTTAGATTTGGATTGTATGACAATATAGTGATTGATAATGCTTTCACACCCGGCAACCTGATTTTAGATTTTGGTGAACAGTCAACAAGCGGAACAGGATTTAAAACATTTCCAATATCCACGCTTGATCTACCGGACGGTGATTATTTTGGGGCTACGGTTTCCAGCGCA…	P080	591	NA	-1	59821	60411
A-Hlh1000090	58186	58692	-1	hypothetical protein	MSSNRFIGIANGIQTLFTALSASSGAGDASKIVMTDSSGKIDPTLMPSGIGAATKSVLASEALVAGDFVNIYNNTGTLNVRKADSSNNRPANGFVLAPFASSANATVYLQGENTGRTGLTPGSIYFLSTAGGVTTTAPTASGNIIQQLGYSTGATAINFEYNDPIVIA	A-Hlh1	ATGTCTTCCAATAGATTCATCGGCATTGCAAACGGGATTCAAACACTATTTACAGCGTTGAGCGCTTCAAGTGGTGCAGGTGACGCTAGTAAAATTGTGATGACTGACAGTTCAGGTAAAATTGATCCAACTTTAATGCCGTCTGGTATCGGTGCAGCAACAAAAAGCGTTTTAGCGTCTGAAGCGTTAGTTGCTGGCGATTTTGTAAACATTTACAATAACACAGGTACGCTAAACGTGCGAAAAGCTGACAGTAGTAACAATAGACCCGCCAACGGGTTTGTTTTGGCTCCTTTCGCTAGTTCGGCAAACGCTACAGTCTATTTACAGGGTGAAAACACTGGTAGAACGGGATTGACTCCGGGGAGTATTTATTTTCTAAGCACAGCCGGGGGAGTG…	P081	507	NA	-1	60465	60971
A-Hlh1000091	58704	60674	-1	alkaline phosphatase PhoD	MGTIAATVKITGTVTSARLAVSTSPTMSPRVFSSNIIPDSNNLCKFIVSGLADNTLYYIQTEVNGNLKGNIGKAKTPPTTATSFKFCLASCARDNSNHPIFDAIRGFNPDFFLHTGDIHYEDINVNNVALYHAAYDLVFSLTKQEQLYREFPMFYMWDDHDYADDNSDSTNVSRPAAIQAYRERVPFSNLLIDTSTATSPVYYKFNYGRCVFLVCDSRSQKSPSSDADTSSKTVLGSSQKAWLINEFNNNPNKFIFVIFSFGWMGSASATQDYWAGYHTERVEIANAIKAAGIANRMMILSGDMHGCAYDSGANSDYATGGGAGIRVVQAAPLDQTTSVKGSGWSSGAFSSFQQQFGQIEVIDTGNADIQVNVSLHRYNVSEPSLTTLLFSANNTITIG…	A-Hlh1	ATGGGTACAATAGCGGCTACTGTAAAAATAACGGGAACGGTGACAAGCGCTAGACTGGCCGTATCAACTAGTCCCACGATGTCGCCTAGAGTTTTTTCCAGCAACATAATACCCGATAGCAACAATCTTTGTAAATTTATCGTGTCTGGACTGGCCGATAATACATTATATTATATACAAACAGAAGTTAACGGCAACTTAAAAGGTAATATAGGCAAAGCTAAAACACCACCTACAACCGCTACAAGCTTTAAATTTTGTTTAGCATCATGCGCGAGAGATAACAGCAATCATCCAATATTTGATGCTATACGCGGTTTTAATCCCGATTTTTTCTTACATACCGGAGATATACATTACGAAGATATAAACGTCAACAATGTAGCATTGTATCATGCT…	P124	1971	NA	-1	60983	62953
A-Hlh1000092	60676	61239	-1	capsid fiber protein	MSVQKFLGFENDVKLFTALSASSGAGDASKILCTNSLGIIDTSFLPSVDAGQIVVTGLATDDLIAGDFINFYNSGGNINVRKADNNTGKIANGFVLETFLNSDIATVYVQGENNLRSGLIPGTIYFLSSEGSVTLTAPNGSGKFVQKLGIAIDENTINFEYNRPVYISDLIGNVDDTTVVSMWTSVY	A-Hlh1	ATGTCTGTTCAGAAATTTTTAGGATTTGAAAACGATGTAAAATTATTCACGGCGTTGAGTGCTTCAAGTGGTGCAGGTGACGCTAGTAAAATTTTATGCACAAACTCATTGGGCATAATCGATACAAGTTTTTTACCGTCTGTTGATGCTGGACAAATCGTTGTAACAGGTTTGGCAACTGACGATCTTATAGCTGGTGATTTTATCAATTTTTATAATAGCGGCGGAAACATAAATGTTAGAAAAGCCGACAATAACACCGGGAAAATAGCAAACGGTTTTGTATTAGAAACTTTTCTCAATTCGGACATCGCAACGGTTTATGTGCAAGGTGAAAATAATTTAAGATCAGGTTTAATACCAGGAACAATATATTTTTTATCAAGTGAAGGATCTGTA…	P081	564	Signal peptide	-1	62955	63518
A-Hlh1000093	61241	61966	-1	hypothetical protein	MRRLRGTIKHFDDQPWINVSVYLTLINGTFNSVNQYPIDTQQKKTDENGEFIFNVIPNVGVEQSYYILTTPDRKKHAFTIPDGTSDIEFSVVRETGIIATDPEYTNVLNYLEDYIDDAIANIQASSVIAEVFSCGQTISALKAVRYDPVTGKVFYVSSSDETHLNKCVGVSSQSGVLNDNIQVVTSGYLTDQSWNWSVGSPIFFDSGGTLTHTPGSNYYQVIAIPVTNNKILISVEQPIKL	A-Hlh1	ATGAGGAGATTGAGAGGCACTATTAAACACTTTGACGATCAACCGTGGATCAATGTTTCCGTTTATCTGACATTGATTAATGGAACGTTTAATAGTGTCAATCAATATCCGATAGACACACAACAAAAAAAGACAGATGAAAACGGTGAATTTATTTTCAATGTCATTCCTAACGTTGGAGTAGAACAAAGTTACTACATACTCACCACACCGGATAGGAAAAAACACGCTTTTACTATACCAGATGGAACAAGCGACATTGAATTTAGTGTGGTTCGAGAAACCGGGATCATAGCAACTGATCCAGAATATACAAACGTTTTAAATTATTTGGAAGATTATATCGATGATGCGATCGCAAATATACAAGCATCATCGGTAATAGCTGAAGTTTTTAGC…	P082	726	NA	-1	63520	64245
A-Hlh1000094	62029	62307	1	hypothetical protein	MDNRDLLQSLKNISERLEELEKPPEKMTFSNSIALIGLIITIIAGFSSVMFIGVSKVTTLELRLQNTYEEMIELKNEIREIKNNDTQRRSNN	A-Hlh1	ATGGATAATAGAGATTTGTTACAGTCGCTCAAAAACATATCAGAGCGATTAGAAGAACTTGAGAAACCGCCAGAAAAAATGACTTTTTCTAATTCGATAGCTTTGATAGGTCTGATAATTACTATCATCGCTGGATTTTCTTCTGTAATGTTTATCGGTGTGAGTAAAGTTACAACTTTAGAATTAAGATTGCAAAATACTTATGAGGAGATGATAGAATTGAAAAATGAAATTAGAGAAATAAAAAACAATGATACTCAACGACGATCAAATAATTGA	P083	279	1 TMP	1	64308	64586
A-Hlh1000095	62279	62878	1	dCTP deaminase	MILNDDQIIELCETQKMIEPYERSLIRFITEEDLKQSKVISYGLSSFGYDIRLSAKEFYTFRHVPGTIVDPKKFNTANLTPGELFYDENGSYFVIPANSYGLGVAIERLNLPRNITAVCVGKSTYARCGIIANITPAEAGWHGHLTLEFSNSSSADCRIYANEGVVQLLFLEGERCKTSYSDRQGKYQNQPESVVIPRL	A-Hlh1	ATGATACTCAACGACGATCAAATAATTGAGCTTTGCGAAACTCAAAAAATGATAGAACCTTATGAGCGATCGCTCATAAGGTTTATTACTGAAGAGGATTTAAAGCAATCGAAAGTCATCAGCTATGGGTTATCCAGCTTTGGGTACGACATTAGATTGTCAGCAAAAGAGTTTTATACTTTTCGTCATGTGCCAGGAACTATAGTAGATCCTAAAAAATTTAATACTGCAAATTTGACTCCGGGGGAATTATTTTATGATGAAAACGGATCGTATTTTGTCATACCTGCTAATAGTTACGGTTTGGGTGTTGCTATTGAGCGCTTAAATTTGCCTAGAAACATTACTGCTGTTTGTGTCGGGAAATCGACCTATGCACGTTGTGGGATAATCGCAAAT…	P084	600	NA	1	64558	65157
A-Hlh1000096	63021	64247	1	hypothetical protein	MITFSDVKEISIESLQENFLSGSFAFCEPEVYVRGSVNQDEVEEKKIQLTFEDDGKKYVEVLEPLTFYQRDGVLYLLNGNNRVNALFQMINTTETKAYEYKLVPYRVLESEPSLEVLEELQVVANDTTNAHSALQLAKRVAATSSRLENVYKAADPKIKKTALNGKVLESLCTIYKRQHHYIRNLLRINEQPETVQNLLENELVSVNTVVEIAKKMPKDASDEYIEEVYGELSAIANGGKITEKTLNEWLNSKKPTPPTTENTENEENTTPAPAITIEDFTTSAIDRFNKLSIIEKQHITPALKPQVSSVVKSGLSLLAGTFDIFTDDESLDLLEDIRALIFNRLGDVDHLVKRAEIAGEEIPNIAKKFNSFNKSVDKLYKAYIEPEQETTVTVIATDD…	A-Hlh1	ATGATTACATTTTCAGACGTTAAAGAAATCTCAATCGAATCATTGCAAGAAAATTTCCTATCAGGATCATTTGCTTTTTGCGAACCTGAAGTTTATGTACGTGGTTCCGTCAATCAGGATGAAGTCGAAGAGAAAAAGATTCAATTAACTTTTGAAGATGACGGAAAAAAATATGTAGAAGTTTTAGAACCTCTCACATTTTATCAGCGTGACGGTGTTTTATATCTGTTAAATGGTAACAATCGTGTAAATGCGTTGTTCCAAATGATTAACACGACTGAAACAAAAGCTTATGAATACAAATTAGTACCTTATCGCGTTTTAGAGTCCGAACCATCACTTGAAGTTTTGGAAGAATTGCAAGTGGTTGCGAACGACACAACCAACGCACACAGCGCT…	P085	1227	NA	1	65300	66526
A-Hlh1000097	64354	64821	1	hypothetical protein	LHQLTDKPMKKTAKYSLTSFKLWKNANGKWHFYNAVFDHADKSSLSYMSACKLIQRGWTPYAIAAKPGISSPLQLEMVDTQPLDDYLREKDPVSFVAGECIKEFLNKPVRKYTETFTPESITASDLALQKAIQDYKDGKYVLPHLLKKVLEHHAK	A-Hlh1	TTGCATCAGTTGACAGATAAACCGATGAAAAAAACTGCAAAGTATTCTTTAACCTCTTTCAAATTGTGGAAAAACGCTAACGGTAAATGGCATTTCTATAATGCTGTTTTTGACCACGCTGATAAAAGTTCTTTGTCTTACATGAGCGCTTGTAAGCTAATACAAAGAGGTTGGACACCATACGCGATCGCCGCAAAACCTGGAATCTCTTCACCGTTGCAATTAGAAATGGTTGATACTCAACCGTTAGATGATTATCTAAGAGAAAAAGATCCCGTGTCGTTTGTTGCTGGTGAATGTATCAAAGAGTTCTTAAACAAACCTGTCAGAAAATATACTGAAACTTTCACCCCGGAGTCAATAACAGCGTCCGATTTAGCGTTACAAAAAGCCATACAA…	P086	468	NA	1	66633	67100
A-Hlh1000098	64811	65698	1	DNA methylase	MLNKIHLGDCVQIMKSFPNAFMDLTVTSPPYDNLRDYKGYAFDLKALIRELYRCTKIGGVIVWVVGDQTMNGSESGESFRQALSFMEYGFKLNDTMIYKKHHPKPEITGYRYQPTFEYMFVFSKGTPKTFNPLREPCKNAGKSYTSSTKTLKDGSKIGYNSPFIRDTKIKSNIWEYSVGYMQSSKDAIAFEHPAIFPEQLAEDHILSWSDSGETVFDPFMGSGTVAKVAFQLGRNYIGCEISEEYLAIAEKRLSILSPPESINAGDLALQKAREDYKNGRYVLPHLLKKVLENDN	A-Hlh1	ATGCTAAATAAAATACATCTTGGCGACTGCGTACAAATAATGAAAAGCTTTCCCAATGCTTTTATGGATTTGACAGTGACTTCACCACCTTATGATAATCTAAGAGATTATAAAGGGTATGCTTTTGATTTAAAAGCGCTTATACGTGAGTTATATCGCTGTACAAAAATCGGTGGTGTGATAGTCTGGGTAGTAGGTGATCAAACAATGAACGGATCAGAAAGCGGTGAAAGTTTCCGTCAAGCGCTTTCGTTCATGGAATACGGTTTCAAGTTGAATGACACGATGATATATAAAAAACATCATCCCAAACCTGAGATCACAGGATACCGATATCAACCAACTTTTGAGTATATGTTTGTGTTTTCCAAAGGAACACCCAAAACTTTCAATCCATTA…	P087	888	NA	1	67090	67977
A-Hlh1000099	65688	66119	1	RusA	MIIKYAFPFPAFPKPRGGIGRYGNMTHSSKGYRQWQKIFLESLSNYHSSGKLFPSDFHCLIFFFYIKPKRGQPPDLENLQGGIQDTLKKAGCITEDNYKIISRYYTDHIVVKDQSRFDLYVVNNHQEKIYVIDKLLPKIDTNN	A-Hlh1	ATGATAATTAAATACGCTTTCCCGTTTCCAGCTTTCCCCAAACCACGCGGGGGAATAGGACGTTATGGCAACATGACGCATAGTAGCAAAGGTTACAGACAATGGCAAAAAATCTTTTTAGAGTCACTCTCAAATTATCATAGCTCTGGAAAGTTGTTTCCTAGTGATTTTCATTGTTTGATATTCTTTTTTTACATAAAACCTAAGCGCGGCCAACCTCCTGATCTGGAAAATCTTCAAGGTGGTATACAAGACACTTTGAAAAAAGCCGGATGTATAACAGAGGACAATTACAAAATAATTAGCAGATATTACACGGATCACATAGTTGTAAAAGATCAATCACGTTTTGATCTGTATGTGGTTAACAATCACCAAGAAAAGATTTATGTGATTGAT…	P088	432	NA	1	67967	68398
A-Hlh1000100	66158	66508	1	hypothetical protein	MKTVINKERRLKVTYKTVGDKLVLVSPTSYIDPETLEIAVKVLDGKINIDALITNGVDVIDDGESYIEAPDRFWKACGEVKAIVKATEDTFFHKNGTSIYNKNMIIVKRKNEKTKS	A-Hlh1	ATGAAAACTGTGATCAATAAAGAACGTCGCTTAAAAGTCACTTACAAAACAGTGGGTGATAAATTGGTTTTGGTGTCACCGACGAGTTATATTGACCCTGAAACGCTGGAAATTGCGGTAAAGGTTCTTGATGGTAAAATAAATATAGATGCTTTGATTACAAACGGCGTAGACGTTATAGACGATGGGGAAAGCTATATAGAAGCGCCAGATCGTTTTTGGAAAGCTTGCGGAGAGGTAAAAGCCATTGTCAAAGCAACCGAAGACACGTTTTTTCATAAAAACGGTACATCGATATACAACAAAAACATGATAATAGTAAAGAGGAAAAATGAAAAAACAAAATCTTGA	P089	351	NA	1	68437	68787
A-Hlh1000101	66489	66659	1	hypothetical protein	MKKQNLDNVMYICLPVSTLCLLFLVCQISLMNPGVKKFYDGFWQGFWSNIHFKLTP	A-Hlh1	ATGAAAAAACAAAATCTTGACAACGTGATGTATATTTGTTTACCTGTTTCCACGTTATGTTTATTGTTTTTGGTTTGTCAAATATCTCTGATGAATCCCGGCGTAAAAAAATTTTATGATGGTTTCTGGCAAGGTTTTTGGTCAAACATACACTTCAAATTGACACCATAA	P104	171	1 TMP	1	68768	68938
A-Hlh1000102	66725	67504	-1	thymidylate synthase	MQVRLIARTTGVENTEYQGKSIDEIITGIARISSSREINDLFEEPHKLLRHCIINGHWSVFTESNLIFEIVTSRAIGRELLRHWSIRPQEFSQRYAEITKFEEIEIRKQSKNNRQSSTEVFDPVIVSNDRLDIQIRASDLINDALELCENNYKLLLNAGVARESARFISPEATETRLIMNGTIREWITTCNQRLHHTAQKECRLIAEAIRDFLLVECPIISKALYNFEDAYHIHILDRVTLEKFGVYQLVKKNDFKKLK	A-Hlh1	ATGCAAGTAAGATTGATAGCACGTACCACCGGAGTAGAAAACACGGAGTATCAAGGTAAAAGCATTGATGAGATTATCACAGGCATTGCACGTATTAGCAGCAGTCGAGAGATTAACGATCTTTTTGAAGAACCTCACAAACTGTTAAGGCATTGTATTATTAATGGTCATTGGTCAGTTTTCACAGAATCAAATTTGATATTTGAAATTGTCACAAGTCGTGCAATTGGAAGAGAATTGTTAAGACATTGGAGCATTCGACCGCAGGAATTTAGTCAACGTTACGCAGAGATAACAAAATTTGAAGAGATTGAAATTAGAAAACAATCTAAAAATAATAGACAGTCATCAACAGAGGTTTTTGATCCTGTAATAGTCTCAAATGACAGATTGGACATA…	P090	780	NA	-1	69004	69783
A-Hlh1000103	67548	67865	1	hypothetical protein	MEERQNYFIEVVGNGGITMQILQVYTMFIGFIFESIELIKSDANNLPIALQSLENIIFDAGSIHPDLFVYLNNDKQKFDDLLKSFAKLPETKKTTAKTAIAKDEV	A-Hlh1	ATGGAAGAAAGACAAAATTACTTTATAGAAGTTGTCGGGAACGGTGGGATCACTATGCAGATTTTGCAAGTTTATACCATGTTTATCGGTTTCATTTTTGAATCCATAGAATTGATTAAAAGTGATGCCAACAACTTACCAATTGCTTTACAGTCACTTGAAAATATAATTTTTGATGCTGGTTCTATTCATCCTGATTTGTTTGTTTATTTGAACAATGACAAACAAAAATTTGATGATTTGTTAAAAAGTTTTGCAAAATTGCCAGAAACAAAAAAAACGACCGCTAAAACAGCGATCGCCAAAGATGAAGTTTGA	P091	318	NA	1	69827	70144
A-Hlh1000104	67866	68507	-1	hypothetical protein	MSPLSNLLNRYSYPTVDFCDKCRKFTGVRKDGHNLVCRSCDSGEESLLEIKIEPNKAFEKIVKNTESIKAELLTTKKSGNRKLIKKDVLSFVNSLDEPISLKELASFFGVSPQAVRKFFRRDCTAWEFSAQYDPQKREHAIGKHDPDNKLLIILTGLWIIFPSRINIQGLYLLTKLDKKEIVKICQNSEKIGKEKEKGSWRYWLINAHNLYLK	A-Hlh1	ATGTCACCATTATCAAACTTGCTCAATCGATATAGTTATCCCACAGTGGATTTTTGTGATAAGTGCAGAAAGTTCACCGGAGTCAGAAAAGACGGTCATAATCTTGTATGCCGTAGTTGTGACTCCGGGGAAGAATCGCTATTAGAAATTAAAATAGAACCCAACAAAGCTTTTGAAAAGATAGTAAAAAACACCGAATCAATAAAAGCTGAATTGTTGACTACTAAAAAAAGTGGCAACCGTAAACTGATTAAAAAAGACGTTTTAAGCTTTGTAAACTCTTTGGATGAACCGATATCATTAAAAGAATTGGCAAGCTTTTTTGGTGTGTCACCACAGGCAGTCAGAAAGTTTTTTAGACGAGACTGCACCGCATGGGAATTCAGCGCTCAATATGAT…	P092	642	NA	-1	70145	70786
A-Hlh1000105	68512	68712	-1	hypothetical protein	MEVWESIKNYLENGADLKDLLIQIEGDENVIYILYGMLKYIDMTGFLEDHQEYLMNYLERQYNLQY	A-Hlh1	ATGGAAGTATGGGAAAGTATTAAAAATTACTTAGAAAACGGTGCAGATTTGAAAGATTTGTTGATACAAATAGAAGGAGATGAAAACGTTATCTATATTTTGTATGGAATGTTAAAATATATTGATATGACTGGATTTTTGGAAGATCATCAAGAATACTTGATGAACTATTTGGAACGTCAATACAATTTGCAATACTAA	P093	201	NA	-1	70791	70991
A-Hlh1000106	68746	69120	1	hypothetical protein	MYYNAFQQIIVKNKLKTILRLIKSINVDSLCYHDLVLLNKFILKSLFIFKLTPLSKTVIKLLLESLYKTVESLIVKKIDDNTSSKLDRLILILKMINLKLYENDTNLVKIDKNKITIDDRYKHY	A-Hlh1	ATGTATTATAATGCTTTTCAACAAATTATAGTTAAAAATAAATTAAAAACTATCTTACGACTGATAAAGTCGATCAATGTTGATAGTCTTTGTTATCATGATTTGGTTTTGTTGAATAAATTCATTTTAAAATCGCTTTTCATTTTTAAATTGACTCCGTTGAGTAAAACGGTTATCAAATTATTATTAGAGTCACTCTATAAAACTGTTGAGTCTTTGATAGTTAAAAAAATAGATGATAACACATCATCGAAACTTGATAGGTTGATATTGATTTTAAAAATGATTAATTTGAAATTGTATGAAAATGATACAAATTTGGTAAAAATAGACAAAAACAAAATAACGATTGATGATAGATACAAACACTATTGA	P094	375	NA	1	1	375
A-Hlh1000107	69098	69586	1	hypothetical protein	MIDTNTIDIIKEVLEKSGDINAACIAASITRHTFEKWLQLYPTFKDIVTESKEFYKNCLVSDWDIDAIAYTNNLLKGRVVTRSVVKRFVLPKQDLEDDESFSPESLELVELYREEREQTVQPPKWLLERYLPKENVEPIKVQINFADMPNVDDDDPEAKEVE	A-Hlh1	ATGATAGATACAAACACTATTGATATTATTAAGGAAGTGTTAGAGAAAAGCGGCGATATAAACGCCGCTTGTATCGCCGCGTCTATCACTCGTCATACGTTTGAAAAATGGTTGCAATTATATCCAACTTTTAAAGATATTGTTACAGAATCTAAAGAGTTTTACAAAAACTGTTTAGTATCTGATTGGGACATCGACGCGATCGCATACACAAACAATCTTTTAAAAGGTCGAGTGGTAACACGTAGCGTTGTTAAACGCTTTGTATTGCCTAAACAGGATTTAGAAGATGATGAAAGCTTTTCCCCGGAGTCATTAGAACTCGTTGAACTTTACAGAGAAGAACGGGAACAAACCGTACAACCGCCAAAATGGTTGTTAGAAAGATATCTACCTAAA…	P095	489	NA	1	353	841
A-Hlh1000108	69586	70944	1	large subunit terminase	MSNFPIVDSYHPKQGNIVARGIAGTQNSILVCGRGFGKSIAGRGIIYTTAIDYRGMIPPQGKTKLFNVIAMPHLNQAKKIHWPPLEYLFTETELSRLVKNINRSEGTIELIGSLPGIALAGLNDDNGNKIRGWSIPRLVIDEMQDVKPGIWASIKPAVDRCLGRVFVSGTPKGKGTPFHRFCKEMTAQGWKYYHYFTEHNPFLPDIDRVLAEARQALTEREFNAEYRASWEDFPGQIFDQLESHHVLPPESFPNNFDSIVMGIDWGDIHPAIAIVGIRDFPYKYYLIDFWQGNPDDTSNSISMDLFIKTCGEYCDKYGIHSTYPDVFQPGNINNIYEFRNSEWPGMRNIVDPDSGDYQRMRTLKVMPSLSMLNRLFSKNRFFIHKDIEDQFRTIVRKQD…	A-Hlh1	ATGTCAAATTTTCCCATAGTTGACTCATATCACCCAAAACAAGGAAACATTGTGGCAAGGGGCATTGCCGGCACACAAAATAGTATTTTGGTGTGTGGTAGAGGTTTTGGCAAATCAATTGCTGGTAGGGGCATAATCTATACAACAGCAATTGATTACAGAGGCATGATACCGCCCCAAGGAAAAACAAAACTGTTCAATGTGATCGCAATGCCTCACCTGAATCAAGCTAAAAAGATTCATTGGCCGCCGCTTGAATATCTTTTCACAGAAACAGAATTGTCCAGACTGGTAAAAAATATCAATCGGAGTGAAGGCACTATAGAGTTAATCGGATCACTTCCTGGTATCGCTTTGGCTGGATTAAATGATGATAATGGTAATAAGATCAGAGGTTGG…	P001	1359	NA	1	841	2199
A-Lfl4000001	3	1358	1	large subunit terminase	SNFPIVDSYHPKQGNIVARGIAGTQNSILVCGRGFGKSIAGRGIIYTTAIDYRGMIPPQGKTKLFNVIAMPHLNQAKKIHWPPLEYLFTETELSRLVKNINRSEGTIELIGSLPGIALAGLNDDNGNKIRGWSIPRLVIDEMQDVKPGIWASIKPAVDRCLGRVFVSGTPKGKGTPFHRFCKEMTAQGWKYYHYFTEHNPFLPDIDRVLAEARQALTEREFNAEYRASWEDFPGQIFDQLESHHVLPPESFPNNFDSIVMGIDWGDIHPAIAIVGIRDFPYKYYLIDFWQGNPDDTSNSISMDLFIKTCGEYCDKYGIHSTYPDVFQPGNINNIYEFRNSEWPGMRNIVDPDSGDYQRMRTLKVMPSLSMLNRLFSKNRFFIHKDIEDQFRTIVRKQDK…	A-Lf14	TCAAATTTTCCCATAGTTGACTCATATCACCCAAAACAAGGAAACATTGTGGCAAGGGGCATTGCCGGCACACAAAATAGTATTTTGGTGTGTGGTAGAGGTTTTGGCAAATCAATTGCTGGTAGGGGCATAATCTATACAACAGCAATTGATTACAGAGGCATGATACCGCCCCAAGGAAAAACAAAACTGTTCAATGTGATCGCAATGCCTCACCTGAATCAAGCTAAAAAGATTCATTGGCCGCCGCTTGAATATCTTTTCACAGAAACAGAATTGTCCAGACTGGTAAAAAATATCAATCGGAGTGAAGGCACTATAGAGTTAATCGGATCACTTCCTGGTATCGCTTTGGCTGGATTAAATGATGATAATGGTAATAAGATCAGAGGTTGGTCT…	P001	1356	NA	1	844	2199
A-Lfl4000002	1439	2989	1	hypothetical protein	MKSYLPVAKEIEKVAQGGHHLNPEDFLLIRDEESPGVTKKRIEKFAPENYLGAAIRLQRILQKSGVLEIKSESLPGDVIVWENFFNKVDKRNSSLKDFVIDVFTEALINKYCYVQIELNRLDFDTVTEAEADNILANRKPYYFKIPLQSIMVEKCDGDTIEWIKYKRLDKVDDPFGKTIYNMTYVLIDNTHITTWTYYDIILSDSGEISKIWDQRLNYGKGAYRYIDKEKDKADPVSFAHNRGSCPVVRYRMDDSLYMADQVYLAQRMIYGLSMNLFHTAANAGFVQKWIRPYIAGNDTRISKESGGASYIPLPKEALNEIIKKYAESLGDESIIMADFFTFEELAGTSVEMQIGLIERLRNYIFTAILFNNAKFEQSTSDTQSGAAKEIDFYVQNLAL…	A-Lf14	ATGAAAAGCTACTTACCAGTAGCTAAAGAAATAGAGAAAGTTGCTCAAGGTGGACATCATTTAAATCCTGAAGATTTTTTATTGATTCGGGATGAAGAATCCCCCGGAGTCACTAAAAAGCGTATAGAAAAATTCGCGCCAGAAAACTATTTAGGCGCTGCGATTCGGTTGCAAAGGATTTTACAAAAATCCGGAGTATTGGAAATAAAATCCGAATCGTTGCCCGGAGATGTGATAGTCTGGGAAAATTTTTTTAATAAAGTTGACAAACGTAATTCATCGTTGAAAGACTTTGTTATTGATGTTTTCACAGAAGCGCTGATAAACAAATATTGTTATGTGCAAATCGAATTAAATCGTTTAGATTTTGATACTGTTACAGAAGCGGAAGCTGATAAT…	P002	1551	NA	1	2280	3830
A-Lfl4000003	3173	3871	1	outer membrane protein	MSENKEGLTDDQTNQDAPENAGAEDIDAKLEARFKAFEDKINQALNGVVKKVEKRLTTDKPPESKKPSDSSESDSKKPELDTIQALKSEMEKSRKELEEQLEAERQERAKDKRQVFLSSVDSKISTAIASQKFDDPEAALTVFKSMYGLDNWHPGSSGYVIYKTSEEDEGKTLESLVKDWAKSPVGKRFFNKNLPNGTGLDTPDKTNQTSSKAKTLFEKRKEAKESGFNIKM	A-Lf14	ATGAGCGAGAACAAAGAAGGTTTAACAGACGATCAGACCAATCAGGATGCACCGGAAAACGCTGGTGCTGAGGACATCGACGCTAAATTAGAAGCTAGATTTAAAGCTTTTGAAGACAAGATAAATCAAGCGCTTAACGGTGTGGTCAAGAAAGTTGAAAAGCGATTAACAACCGACAAACCCCCGGAGTCAAAAAAACCTTCTGACAGTTCCGAGAGTGACTCTAAAAAACCCGAACTTGATACCATTCAGGCTTTAAAATCTGAAATGGAAAAAAGCCGGAAAGAGTTAGAAGAACAACTAGAAGCTGAAAGACAAGAAAGAGCAAAAGACAAGCGCCAAGTATTTTTGTCAAGCGTTGACAGCAAAATCAGTACAGCGATCGCTTCACAGAAATTT…	P003	699	NA	1	4014	4712
A-Lfl4000004	3878	4975	1	Chain A, Putative major capsid protein	MPLTNLTPTELLANKAVDYLANSFLVETPMLGLLANRVVNQKQKAIEWGAKVAQGVVGGRTRTGALANDTQGTLKGAALSVPDYYIKHQFDVGKDEIVNSDATGKISAVRDPVATAISDAFDVLAKKINSVLYTASGVADTTNFGIFGLDAAAGTTVVNSATGTYAGISKVTFPRWRSIIQGGAVAGTNEALTINRMTAMLRARRTAGVSYKGNQNQRLIIVTTDQIENDVLRPLYGTVVDNQNVDFTRLDKDLLPYVNYMVKGIPVISDIDCPSNKMYLLNLDKLAIYSFDQSDADQSDGKITYIPLRYVDETGDAPSESTLWVRLANVSDEHPDVLKFELSVALQLVAFDLIDSISVIRDITQ	A-Lf14	ATGCCTTTAACGAATTTAACGCCTACCGAACTATTAGCAAATAAAGCTGTTGATTATTTAGCAAATAGCTTTTTAGTTGAAACGCCTATGTTAGGTTTGTTAGCTAACAGGGTAGTTAATCAGAAACAAAAAGCTATTGAATGGGGTGCTAAAGTTGCTCAAGGTGTAGTAGGTGGACGTACCAGAACAGGCGCGCTTGCCAATGACACACAAGGAACTTTAAAAGGTGCTGCTCTATCCGTTCCTGATTATTACATCAAACATCAGTTTGATGTTGGTAAAGATGAGATCGTCAACTCTGATGCTACTGGTAAAATCTCAGCAGTACGTGATCCCGTTGCGACCGCTATCAGTGACGCTTTTGATGTATTAGCTAAAAAGATCAACAGCGTTTTATAT…	P004	1098	NA	1	4719	5816
A-Lfl4000005	5120	5599	1	hypothetical protein	VTPGETVTHPLETYYNQFLDGLPISELEEMEIEFIAMCIGFPRSQNNFVNALLDLTTMEIYTIRLSVKEILRLDKLNKESIENRQVTKVEDITMNMNYTGDIKDELVTEVKKLARLLRLPVLDNLYVSYDDVEGQIGANGLLQPLNRSFGGYLTGYTVR	A-Lf14	GTGACTCCGGGGGAAACTGTGACTCATCCGTTAGAAACATATTACAACCAGTTTTTAGACGGTTTGCCTATTTCCGAACTTGAAGAAATGGAAATAGAATTTATTGCTATGTGTATCGGTTTCCCCCGGAGTCAAAACAATTTTGTAAACGCGTTGTTAGACTTGACAACGATGGAAATTTATACTATACGTTTATCGGTTAAAGAAATTTTGCGACTTGATAAACTCAATAAAGAATCTATCGAAAATCGTCAAGTGACCAAAGTTGAAGATATCACAATGAATATGAATTATACGGGTGATATCAAAGATGAACTGGTAACAGAAGTAAAAAAACTTGCCAGGCTGTTAAGATTGCCTGTTTTGGACAATCTTTATGTTAGCTATGATGATGTCGAA…	P005	480	NA	1	5961	6440
A-Lfl4000006	5596	5919	1	hypothetical protein	MIIKSGYLFNDFDTRQVLQNAVDDATAIGVDIVGSRTPVRTGNLLSRWDSEDYLDFDAVSSSIFNDTHYAHFVEVGTSRFSGRFYLLRSLSEIEENFIETIIDKLGD	A-Lf14	ATGATCATTAAATCCGGTTACTTATTTAATGATTTTGATACCCGTCAAGTGTTACAAAACGCTGTTGATGATGCAACAGCAATCGGTGTGGACATCGTAGGATCACGTACTCCTGTTAGAACCGGAAACCTGTTGAGTCGTTGGGACAGTGAAGATTATTTAGATTTTGATGCGGTATCATCAAGCATTTTTAATGATACACATTATGCACATTTTGTAGAAGTAGGTACATCACGTTTTAGCGGTCGTTTTTATTTGTTGCGATCGCTTTCGGAAATTGAAGAGAATTTTATAGAAACTATCATAGATAAATTAGGTGATTAA	P006	324	NA	1	6437	6760
A-Lfl4000007	5919	6317	1	hypothetical protein	MLYSNLINVKQKVISIREKLGDPRLKTLVFEYPVGQLFRVTPKLKVSMVPKNMIGLPLDSKANIMISADDYYVKDVSRNVPEGALRTRVWLDPVINDSGEIISGINCRCHVISDKSGLSWDLILRKEREVRI	A-Lf14	ATGCTTTACTCTAATTTGATAAACGTTAAACAAAAAGTAATATCTATTAGAGAAAAGCTCGGTGATCCGCGTTTAAAAACTCTTGTTTTTGAATATCCTGTCGGTCAACTTTTTAGAGTCACTCCAAAATTGAAAGTGTCGATGGTTCCCAAAAACATGATCGGTTTGCCGTTAGACAGCAAAGCTAACATAATGATCAGTGCAGATGATTACTATGTAAAAGATGTCAGTCGTAACGTGCCAGAGGGAGCGCTTAGAACACGCGTCTGGTTAGATCCGGTAATAAATGACTCCGGGGAGATCATATCCGGTATTAACTGCCGTTGCCATGTAATCAGCGATAAATCCGGTTTATCGTGGGATTTGATTTTGCGTAAGGAAAGAGAGGTAAGAATATGA	P007	399	NA	1	6760	7158
A-Lfl4000008	6314	7030	1	hypothetical protein	MTKPSLIRQSLLQHINSVVWLQTRGIQEPLKPDVVVNNVAYPPNIVVEKPMNNIEVGFKSQQINDTGDVRQFICECVFDYSLVWVFSRETYKTYHQIPRSQIEDLIVFCQQFVMTSRVDEDITNITVKPSQIIVKPTEDVNSDVSNSSSWSVIANLLFIVEFLSSLDEFSPIDFNKIQPPTWELLDDLDPIVPEQPFTLNGVIISLNKSELPNVRTDEPDTYQLEEIIYIPPSIEEQI	A-Lf14	ATGACAAAGCCCTCTTTAATACGGCAAAGTCTTTTACAACATATTAACAGTGTTGTTTGGTTGCAAACACGGGGAATACAAGAACCTTTAAAACCTGACGTTGTTGTCAACAATGTTGCTTATCCTCCTAACATTGTCGTGGAAAAACCGATGAACAACATTGAAGTCGGTTTTAAATCACAGCAAATAAACGATACAGGCGACGTAAGACAATTTATATGTGAATGTGTTTTTGATTACTCTTTGGTATGGGTATTTAGCAGAGAAACATATAAAACTTATCATCAAATCCCCCGGAGTCAAATTGAAGATTTGATAGTTTTTTGTCAACAATTTGTTATGACTTCCAGAGTCGATGAAGACATTACAAACATCACCGTAAAACCTTCACAAATAATT…	P008	717	NA	1	7155	7871
A-Lfl4000009	7055	8575	1	tail sheath protein	MTNFLNGVNIGTPGAYAFYQTTQSRPINVEPFRSCYMVGFASNGANKNVPTRVSSLVDFNNVFVNSESAKSVDLFFKNSQSFGNLYFINVAIPTRFQIVVNAATSGSYSVTINGVTKNLTVTGGATTQTIAADVISAINTDTVLNKEVLAAVGGTSSTVVITSKKPTNTTTAAVTGVIFTLTTITGTVPTAADYVYTINNTFDPALEAGFIIAPEAFSTFNKNDRLSVQVAMENLASAYRYQWAALIDSGAMSEISNTDRAIAEAATYNSVQGHCSYYYPYLINLEDQQVPPSAAVAGIALYRYVIDGFAEPPAGVNFPLKGVKNVAYKVTWEEQNVANPEGVNCILNKENYGIVIWGARTLSADPNIVFISTRVILNIIINTLNRGYDFDIFNAVGGA…	A-Lf14	ATGACTAACTTTTTAAACGGCGTAAATATTGGAACACCCGGAGCTTACGCGTTTTACCAAACCACGCAAAGCAGGCCGATAAATGTTGAACCTTTCCGTAGTTGTTACATGGTAGGTTTTGCTTCTAACGGTGCTAATAAAAATGTGCCTACTCGCGTTAGCAGTTTGGTAGATTTTAACAATGTTTTTGTGAATTCTGAAAGCGCGAAAAGCGTCGATCTGTTCTTCAAAAACTCTCAAAGCTTTGGCAATCTGTATTTTATCAATGTTGCAATCCCTACACGTTTTCAAATTGTTGTAAATGCTGCTACGTCTGGTAGTTACTCTGTCACAATAAACGGTGTGACAAAGAATTTAACCGTCACAGGAGGAGCCACAACACAAACAATTGCGGCTGAT…	P009	1521	NA	1	7896	9416
A-Lfl4000010	8634	9140	1	tail tube protein	MAVSKRPFSINGFAVNLTIGQFIDARYWSKCTKIEKMYNSGEYSDGQSNIIFDLPGAIKYSEVTLSKALSPGDEELINKLIAVNSDPIAYVSVFIQPVYRDGYYTVPQGGKIVLEFCTVSRVTPINEIDTMGSNPAMFELAVKPSRIRSDGGNINWWVEPSFELASGQ	A-Lf14	ATGGCAGTTTCTAAAAGACCGTTTTCTATTAACGGGTTTGCTGTGAATTTGACAATCGGACAATTCATTGATGCCCGTTATTGGTCGAAGTGTACCAAAATAGAAAAGATGTACAACAGTGGTGAATACAGCGACGGACAGAGCAATATTATATTTGATCTTCCCGGTGCTATCAAATACTCTGAAGTGACTTTATCTAAAGCGCTTTCACCCGGAGATGAAGAACTGATAAACAAATTGATTGCTGTTAACAGTGATCCTATTGCTTACGTGTCGGTTTTTATTCAACCTGTTTACCGTGATGGATATTATACAGTACCTCAAGGTGGTAAAATAGTATTAGAGTTTTGCACAGTTTCAAGAGTTACTCCTATTAATGAAATTGACACTATGGGTAGT…	P010	507	NA	1	9475	9981
A-Lfl4000011	9156	9596	1	hypothetical protein	MKIQKIEEPINFIMPDDVPEDAIQEQKSVSKDKSDVSESTGVIVDEVVTPSGKDAIAFNSPVTGLRVVVLVPDTLEILAIEREIVKKHRESGAFEQSIVFLSHLIVEYGDQKGHRLFSFEKLLKFSRKELTVINMIATEFFRLGEI	A-Lf14	ATGAAAATTCAAAAAATAGAAGAACCTATCAATTTTATCATGCCTGATGATGTTCCTGAAGATGCTATACAGGAACAAAAATCAGTATCAAAAGATAAAAGCGATGTGTCAGAATCCACGGGCGTGATAGTTGATGAAGTTGTCACACCAAGCGGTAAAGATGCGATCGCTTTTAATTCTCCGGTGACAGGTTTACGAGTAGTTGTACTAGTGCCTGACACACTGGAAATTTTGGCAATCGAAAGAGAGATTGTTAAAAAACATCGTGAAAGCGGTGCGTTTGAACAATCTATAGTGTTTCTATCTCATTTGATTGTTGAATACGGCGATCAAAAAGGTCATAGACTTTTTAGCTTTGAAAAGTTATTAAAATTTAGCCGAAAGGAGTTAACGGTTATT…	P011	441	NA	1	9997	10437
A-Lfl4000012	9586	9798	1	hypothetical protein	VRFDFDENILYYAGYEFDEKQIKKAILSACGGNFTETYFKMLEIPVIKLFEMLNLFVEYQQEQEKLIKSK	A-Lf14	GTGAGATTTGATTTTGATGAAAACATTTTGTATTATGCTGGATATGAATTTGACGAAAAACAGATCAAAAAAGCGATTTTAAGCGCTTGCGGGGGCAATTTCACAGAGACATATTTTAAAATGTTGGAAATTCCCGTAATAAAGCTTTTTGAAATGTTAAACTTGTTTGTTGAATACCAGCAAGAACAAGAAAAACTTATCAAATCGAAATAG	P011	213	NA	1	10427	10639
A-Lfl4000013	9868	11937	1	tail protein	MANRQHVISVDLRLLTGNFDSSLNYIQGRLNGVFGVVSDNATNSFFGNGGFLSSYLWNQAFNAIQTAGMAAFRAIGNEVKRSIAFQNDLISMATSYKGLLSLSTKEAFGLARQSNIIFQQRNVGLPTFGNFGTQLRSQYGDDFLGAFYDQNNVKASLERTADMIGRTTVLLGSISGVTNYQRTSFLSNFLSDDFKKLSRLEVFRNSPQLQRAFTQQTDAIGGEQGFNALTRKDRLLLLENIAAIAVDDDIIKAYKNSLGGVLSRLGQELFGDIGIFSFTRDLIFGLPNTSILSSITFFMKEIFAPDGVFGLIKPALQGIVDTVLIGTKFILDRTSFIFMGLNALAKVLQPIAPLIYATSSALTVLAAVGLANTIKSAIQGYLISSGAAMLGGKMGAAAM…	A-Lf14	ATGGCTAATAGACAGCACGTTATTTCAGTAGATTTAAGATTGCTTACAGGAAACTTTGACTCATCTTTAAATTATATTCAAGGACGTTTAAACGGCGTTTTTGGTGTGGTGTCAGATAACGCTACTAACAGCTTTTTTGGTAATGGCGGTTTCTTATCCTCTTATCTATGGAACCAAGCTTTTAACGCCATACAAACGGCAGGTATGGCAGCTTTTCGGGCAATTGGAAATGAGGTAAAGCGTTCTATAGCTTTTCAAAATGATTTAATAAGCATGGCAACATCCTATAAAGGATTGTTGAGTCTATCAACCAAGGAAGCTTTTGGACTGGCTAGACAGTCTAACATCATTTTTCAACAGCGTAACGTCGGATTGCCCACTTTCGGCAATTTTGGTACG…	P013	2070	NA	1	10709	12778
A-Lfl4000014	11930	12055	1	hypothetical protein	MRKSDIIGWTIIIVLSIYFLSVSWYEQNKNDSGGDQYERIK	A-Lf14	ATGCGTAAAAGCGATATCATAGGATGGACAATAATTATAGTTTTGTCTATTTACTTTTTATCAGTTTCATGGTATGAACAAAATAAAAATGACTCCGGGGGTGATCAGTATGAACGTATAAAATAA	P096	126	Signal peptide	1	12771	12896
A-Lfl4000015	12461	15160	-1	valine-glycine repeat protein G1	MQDPIIKVLIANDTFLLGQDIIDLDFQIGEGKKQNNISFTIFDKDGFYADKYISTSYAQGGIDLPIDFLENPDDAKDTNSASTATEIDSGGNGTVSRGGVFTPKIRAFLDTIASKETAPGTALNIDGYRSVSGSSTLFDESEMVAGGFPRSQGSKNIGRYQFTVVDYNHARSKYPSINNYSPQNQDLLAYFKLQHRNVLPYLLRDDLDNAIDKASYEWQSFPGIGKPQGQTNQVQSGTTIASLKSYYESRLAYYRSLEAGSDFQASAPKDTTNNQYAGKEYKTIRTLSNSTTASFYGYNDGFDSSDLTANGERFNPEGITAAHESLPFGTLVKVTWAVNNKSVVVRINDRGAFVRLGRQIDLSYGAAKALSSPGNDAIAAGLLTVKLEVVELRTPIGEN…	A-Lf14	ATGCAAGATCCGATAATCAAAGTTTTAATAGCTAACGATACATTTTTACTTGGTCAAGACATAATTGATCTTGACTTCCAAATCGGTGAAGGCAAAAAGCAAAATAATATCAGCTTTACAATATTTGACAAAGACGGATTTTATGCTGACAAATACATAAGTACAAGCTATGCTCAAGGCGGGATCGATCTGCCAATAGACTTCCTAGAAAATCCTGATGATGCTAAAGACACTAATAGCGCATCGACAGCAACGGAAATTGACTCCGGGGGAAATGGCACGGTAAGCCGTGGAGGAGTCTTCACGCCTAAAATTCGGGCATTTCTGGACACGATTGCAAGTAAAGAGACAGCACCGGGAACCGCCTTAAATATTGATGGTTATCGAAGTGTTTCAGGT…	P015	2700	NA	-1	13302	16001
A-Lfl4000016	15280	16440	1	MAG TPA: restriction enzyme	MNSLLKLSGVYNTDELLKHQNCEESCCKTEHLDIVPEKYLKTGKRGQRPLNPKYVYWFMAKEGFTALSEYVNNSTPLEFRCPVGHVHSMRFSDFQQGKRCKICKNEKHGELLKHTHEYVEKYMSDRDYTLLSKYVNNRTPLQFRCPVGHVHSMRFGHFQQGHRCKICKNEKQSESQKLTHEYVEKYFEKHGYTLLSKYVNNSTPVKFRCPMGHVHSMCFSDFQRGGRCGKCFEETLKGCTNLTAYTILQRTIQRGSTIPEDDLRKLIELEILPKIQKFYSSTPSGHHVDHIIPFSFFDHNDKDQIRACWSLYNLRYLSATQNISRGNRFDIDDIEKMPLDKVNHLIAIAVNASNTPKDYKEAIKHLMIFDSVESDYDDYWEEIIKA	A-Lf14	ATGAATAGTTTATTGAAGTTGTCCGGTGTTTATAACACTGACGAGTTACTAAAACATCAAAATTGTGAGGAAAGTTGTTGCAAAACTGAACATCTTGATATAGTGCCTGAGAAGTATTTAAAAACTGGTAAACGTGGTCAACGTCCATTAAATCCAAAATATGTTTACTGGTTCATGGCTAAAGAAGGTTTTACAGCACTTTCAGAATATGTAAACAATTCAACGCCGTTAGAGTTTCGTTGTCCTGTGGGACACGTACATAGTATGCGTTTTAGTGATTTTCAACAAGGTAAACGATGTAAAATTTGTAAAAATGAAAAGCACGGAGAATTACTAAAACATACCCATGAATATGTTGAAAAATATATGTCCGATAGAGATTACACTTTGCTTTCAAAA…	P125	1161	NA	1	16121	17281
A-Lfl4000017	16485	16952	-1	hypothetical protein	MTTQEFVSKNKTIESELLDLLINPNTDDSILTRNRQAIADRDLFDIEWEPGQSLNKLATEYLGDSFAWQIIADANGIDPTKEIDIGAGLKVPDQKALENSIKKYIVNSPQGKQLISDAKQSILNLIGVGDSNTEFSKTLKDCIGKVVNFSFDNTQ	A-Lf14	ATGACTACACAAGAATTTGTAAGTAAAAACAAAACTATCGAATCTGAACTACTTGATTTGCTTATCAATCCGAATACAGATGATAGCATATTGACAAGAAACCGTCAAGCGATCGCTGACCGCGATTTATTTGATATCGAATGGGAACCGGGTCAAAGCCTTAATAAACTTGCCACAGAGTATCTTGGTGACAGCTTTGCATGGCAGATCATCGCTGACGCTAACGGCATAGATCCTACAAAAGAAATTGATATAGGTGCAGGTTTGAAAGTGCCTGACCAAAAAGCGCTGGAAAATTCTATCAAGAAATATATCGTAAATTCACCACAAGGAAAGCAACTTATCAGTGATGCCAAGCAAAGCATTTTGAATTTAATTGGTGTAGGTGATTCTAATACA…	P016	468	NA	-1	17326	17793
A-Lfl4000018	16951	17232	1	hypothetical protein	MEKSELFERIYNSHDTAKQMITENDYEFTWVGREFYIKVDGYEKIYFKLELYDPETDQYYATKRSDNPSMFVTSWIDARILRALVIDKHAFIV	A-Lf14	ATGGAAAAATCAGAATTGTTTGAAAGAATTTACAACAGCCATGATACGGCGAAACAAATGATAACGGAAAATGATTATGAGTTTACATGGGTAGGACGTGAATTTTACATAAAAGTTGACGGATATGAAAAGATATACTTTAAATTGGAATTGTACGATCCTGAAACAGATCAATATTATGCTACTAAACGAAGTGACAATCCCTCTATGTTTGTTACTTCATGGATCGATGCTAGAATATTACGTGCTTTGGTAATAGATAAACACGCTTTTATTGTCTAG	P017	282	NA	1	17792	18073
A-Lfl4000019	17222	18070	-1	hypothetical protein	MSRFLKNRAVINGLPEIKNPGKYQHCYLIEYTDKNNVKQSATENKNKQKQGFPVYLFMMNPENISYTLPINYQEIAIPFTSKNHVNYSNGGNIVMSMSNLILDTMDEKKSLQPLIDRLIALREPTVKTGLKSHPKILAFKWGSNTFAPCVLTNISFDITRWVDGFPTKARMNMTLKEVQAPSSDSKALAEAKKKVKVETVQNGNLKKGLTEKQLIDGSKVATEYLKKNISFQPRSIQNILSDPKSVIKIDKDTGQVSLFNGAGEFAALVGTYNGDIFTPTRQ	A-Lf14	ATGTCCAGATTTTTAAAAAATCGTGCTGTTATCAATGGATTGCCAGAGATCAAAAATCCTGGTAAGTACCAACATTGTTATTTAATAGAATATACGGATAAAAATAATGTAAAACAATCTGCAACGGAAAACAAAAATAAACAAAAACAAGGTTTCCCCGTTTATTTGTTTATGATGAATCCGGAGAACATCAGTTACACATTACCAATAAATTATCAAGAAATTGCCATACCTTTTACGTCTAAAAATCATGTAAATTACTCTAACGGCGGTAACATCGTTATGAGTATGTCAAACTTGATTTTGGATACAATGGATGAGAAAAAGTCTTTACAACCGCTTATAGATCGTTTAATCGCTTTGAGGGAACCAACGGTTAAAACAGGTTTAAAATCTCAT…	P018	849	NA	-1	18063	18911
A-Lfl4000020	18567	18869	1	hypothetical protein	MIIDVKVKTVKKPVVKINLNNLNEIIGIYDDPEKASKHAKRMYEKHGYKKELITCKWETIENIKNSLEKQIEIGLEYQKKFNSREGEQEIKMMRDFIKNH	A-Lf14	ATGATCATAGATGTTAAAGTAAAAACCGTTAAAAAACCTGTTGTAAAAATAAATCTAAACAATTTAAATGAAATCATAGGTATTTACGATGATCCTGAAAAAGCATCCAAACACGCAAAAAGAATGTATGAAAAACACGGATACAAAAAAGAGTTGATTACTTGTAAATGGGAAACAATAGAAAACATTAAAAATTCATTAGAAAAACAAATAGAAATAGGTTTAGAATACCAGAAAAAATTTAATAGTAGAGAAGGAGAGCAAGAAATAAAAATGATGAGAGATTTTATAAAAAACCATTGA	P106	303	NA	1	19408	19710
A-Lfl4000021	19120	19317	1	hypothetical protein	MKHAQVLIILIVAVMVVTTTIYNGFAPYIKKAIAYGKERYYYRKLAAKNRKEFWQAMTRKNFMGV	A-Lf14	ATGAAACACGCTCAAGTACTTATCATTCTAATTGTCGCTGTTATGGTCGTTACAACCACTATTTACAACGGCTTCGCGCCATACATCAAGAAAGCGATCGCGTACGGTAAAGAGCGTTATTATTACCGTAAATTGGCGGCAAAAAATAGAAAAGAGTTTTGGCAAGCTATGACACGTAAAAACTTTATGGGGGTATGA	P019	198	1 TMP	1	19961	20158
A-Lfl4000022	19314	19469	1	hypothetical protein	MMHIGNTKTVTFPVTKKDFNRLKLLAKSQNISVSQLVEKWVKDKTDETYTT	A-Lf14	ATGATGCACATAGGCAACACAAAAACCGTTACTTTCCCAGTAACCAAAAAAGATTTTAATAGACTAAAGTTACTGGCAAAGTCTCAAAATATTTCAGTTTCTCAATTAGTAGAAAAATGGGTGAAAGATAAAACAGATGAAACCTACACCACGTAA	P107	156	NA	1	20155	20310
A-Lfl4000023	19450	19626	1	hypothetical protein	MKPTPRNIQRIRKALLEHQMVLNSVESGYTATFNGYVILSGSTLQEISDQLNLYNMGK	A-Lf14	ATGAAACCTACACCACGTAACATTCAACGGATACGCAAAGCATTGTTAGAACATCAAATGGTACTGAACAGCGTTGAAAGTGGTTATACAGCTACTTTTAACGGATACGTTATTTTAAGCGGTTCCACGTTGCAAGAAATCAGTGATCAACTCAATTTATACAACATGGGAAAATGA	P020	177	NA	1	20291	20467
A-Lfl4000024	19623	19757	1	hypothetical protein	MINRYTLTFFFVACFLIGLLAGRVTNEVPKVWSDFDVMLQQENE	A-Lf14	ATGATAAACCGTTACACACTTACTTTCTTTTTTGTCGCTTGTTTTTTGATCGGTCTGCTGGCCGGTCGAGTCACTAACGAAGTGCCAAAAGTTTGGTCAGATTTTGACGTGATGTTACAACAGGAAAACGAGTAG	P097	135	Signal peptide	1	20464	20598
A-Lfl4000025	19859	20119	1	hypothetical protein	MVKRYKATQHINGVSPVTNVKRKKSLEPAKMYKISQMDAYKIMQQNFLNDSGEYYTMLDCIRRWRSEEEKGSESFNSFLDLLQALR	A-Lf14	ATGGTTAAACGTTATAAAGCAACACAACACATAAACGGTGTTTCGCCTGTCACAAACGTTAAAAGAAAGAAAAGTTTAGAACCTGCAAAAATGTATAAAATTTCTCAAATGGACGCATATAAAATAATGCAACAAAACTTTTTAAATGATTCAGGTGAGTATTACACGATGTTAGATTGTATAAGACGTTGGAGATCAGAAGAGGAGAAAGGATCAGAAAGTTTTAACAGCTTTTTAGATTTGTTACAAGCGTTAAGATAA	P108	261	NA	1	20700	20960
A-Lfl4000026	20246	21136	-1	exonuclease RNAse T and DNA polymerase	MITNIKTYNEAIASLADLSISGSCVFLDTETIGSFAVPVMVELAVTDLQKRQLFNSYIQPWYMPDHIELKNNCDWEEIIVADTFEQHYDAIKSALADRDILIYNKSFDIRVIREVCEFYAVPLPFDLERVYCLMSLRSAIVGEKLPLEGKHTAYDDVCVMVDLFKELCKHEPIDAIGGDNLAEIIIKYDQVCAEIKHLESLKSEYAEHIKSKLLSDVATGDKTSVEIVHNKKLIKFSGRVDAIAKVDDPSLVPEKYFKSTFDRFAAAKDFKDSGEIAPGVTYERSEILGKIVISDK	A-Lf14	ATGATAACCAACATCAAAACATACAACGAAGCGATTGCATCTTTGGCGGATCTGTCAATATCTGGGAGTTGTGTTTTTCTGGACACGGAAACTATCGGTAGTTTTGCCGTTCCTGTGATGGTTGAATTAGCTGTTACAGATTTACAGAAACGTCAATTGTTTAACAGCTATATCCAACCGTGGTATATGCCCGATCACATCGAGTTAAAAAATAACTGTGATTGGGAAGAGATCATCGTTGCTGACACGTTTGAACAACATTACGACGCGATTAAAAGCGCTTTGGCAGATCGTGACATTTTGATATACAATAAATCTTTTGACATCCGAGTGATTCGGGAAGTATGCGAATTTTACGCCGTACCGCTACCATTTGACCTTGAACGTGTGTATTGTCTG…	P022	891	NA	-1	21087	21977
A-Lfl4000027	21228	21554	-1	hypothetical protein	MNTIQILESWLKAEKEIDYLKDVIEEIKRSKMTNDLEEEYKKVLVHNRELRSELASHKKAIEEWCSNYYQLQVEKDYLTQTIDKKNEQCEHLLKLNKELTERLAKFQS	A-Lf14	ATGAACACTATACAAATACTTGAATCTTGGTTAAAGGCCGAAAAAGAAATAGATTATTTGAAAGATGTTATCGAAGAGATTAAACGATCAAAAATGACTAACGATTTAGAGGAGGAATATAAAAAAGTTTTGGTACATAATAGAGAATTACGATCAGAATTAGCATCACATAAAAAAGCTATTGAGGAGTGGTGTTCCAATTATTACCAGTTACAAGTAGAAAAAGACTATCTGACGCAAACCATCGATAAAAAAAATGAACAATGTGAACATCTTTTAAAATTAAATAAAGAACTCACAGAAAGACTTGCGAAATTTCAATCGTAA	P109	327	NA	-1	22069	22395
A-Lfl4000028	21667	22062	1	hypothetical protein	MNELPPKIDLSYCLSDFQLEILNDICNGLRVRQMAEKHYKSIGSINHAIQSIYAKLDCNNYIGLFKILYGFSPAPDRLEINPQANGIGEIIRLHIKGLKASQISQRTGNSRNYIYNVINSYKAIKKLESEN	A-Lf14	ATGAACGAATTGCCCCCAAAAATCGATTTAAGCTATTGTTTGTCTGATTTCCAGTTAGAGATACTTAACGACATTTGCAACGGTCTGAGAGTAAGGCAGATGGCTGAAAAGCACTATAAATCTATTGGATCGATCAATCATGCCATACAGTCCATTTATGCAAAATTGGACTGCAATAATTACATCGGTTTATTCAAAATATTGTATGGTTTCTCTCCTGCACCAGATAGGCTTGAAATTAACCCACAAGCCAACGGTATCGGTGAAATAATACGATTGCATATAAAAGGTCTGAAAGCGTCTCAAATCAGCCAGCGAACGGGAAACAGCAGGAATTATATATACAACGTGATCAACAGTTACAAAGCCATAAAAAAACTTGAAAGTGAAAACTGA	P024	396	NA	1	22508	22903
A-Lfl4000029	22465	22590	1	hypothetical protein	VQSTLHALHENVTFWICNVTTGFLVPKSQKISPPESIFNAF	A-Lf14	GTGCAGTCTACGTTACACGCGTTACATGAAAATGTAACATTTTGGATTTGTAACGTAACAACCGGGTTTTTAGTACCAAAATCACAAAAAATCTCTCCCCCGGAGTCAATTTTTAACGCTTTTTAA	P127	126	NA	-1	53833	53958
A-Lfl4000030	22675	23085	1	MAG: antirepressor protein KilAC domain protein	MLTSKKKIGYIRGTLNKFRGYMLLETKKELPDIIRLFPDLEEREYFQHTETKEFWFHASNVCKVLGFTNTTTALALHCDDDEKLQKILNGKATWFVSESGIYGLAMGAKTEKAKEFKRWLKHDVLLRSLIQKNTKK	A-Lf14	ATGTTGACATCTAAAAAAAAAATAGGCTATATTAGAGGTACTTTAAATAAATTTAGAGGTTATATGCTTCTTGAAACCAAAAAAGAACTACCGGATATAATTAGACTTTTTCCGGATTTGGAAGAAAGAGAATATTTTCAACACACTGAAACCAAAGAGTTTTGGTTTCACGCTTCCAATGTATGTAAAGTATTAGGTTTTACTAATACTACTACGGCGTTAGCGTTACATTGTGACGATGATGAAAAGTTACAAAAAATTTTAAACGGTAAAGCGACATGGTTTGTTTCAGAATCAGGAATATATGGTTTAGCAATGGGAGCTAAAACGGAAAAAGCTAAAGAATTTAAAAGATGGTTAAAGCATGATGTACTACTAAGATCGCTTATCCAAAAAAAT…	P069	411	NA	-1	53338	53748
A-Lfl4000031	23336	26389	1	DNA primase	MSRQKKESGADNTGKQKNEQSIEVDIIINNSENFVNFLYLQHAVKLAPGVTKEGLRSSFKMNRNDWKRRKGLENFIESVQSGYIHQAEVTINGEKQYHFGVIDFDFWNKAIAAPIEHTISIEQIKELPSVKKYFYAIQKSISYRENAQNCHGYVVFDQPIQSKEEFQKCLKALVEIVKQDIAKLLGLEYNTKLELGVDGCTANNPSQVTFASLEPVTVMDAIASVETLLKLSALFEIKVSRSASVAPESIPDGKNDSVSGRLTVTERVLKHIHDNLFLTVFNGDAGLLYSLHDENQRWTPRTDLEVGEVCRLEGNNPFSGTNNSGSSFMVIYSENELPRFWDKSGSFERLLKDGYSSNHGTFLDYYFHIYREEFPGVELENGQFPSGFFRVLVNHVCDH…	A-Lf14	ATGAGCAGACAAAAAAAAGAATCCGGCGCTGACAACACCGGAAAACAAAAAAACGAACAGTCAATCGAAGTTGATATAATAATAAACAATTCTGAAAATTTTGTCAACTTTTTATATTTACAACACGCTGTAAAACTTGCCCCCGGAGTCACTAAAGAGGGGTTGAGAAGCAGCTTTAAAATGAATCGTAACGACTGGAAACGCCGGAAAGGATTGGAAAACTTTATAGAGTCTGTACAGTCGGGATATATTCACCAAGCAGAAGTTACGATCAACGGTGAGAAACAGTACCATTTCGGCGTAATAGATTTTGATTTTTGGAACAAAGCGATCGCTGCACCGATTGAACACACGATCAGCATTGAACAAATTAAAGAATTACCCAGTGTTAAAAAGTAT…	P068	3054	NA	-1	50034	53087
A-Lfl4000032	26413	26817	1	hypothetical protein	MGKGIGLSGYRGVRKHYTLWKSVLPDETILGLYSTPLEAAIVRERFLHEHRDEFKEVERYLNGVDLAPGVTINTYRKPKKVKPQKHQPRYGKYVYRNRHHNSFFVRIGKYQSKCFPFHSYAIAHRDEYLQNNLK	A-Lf14	ATGGGTAAAGGTATCGGACTATCAGGTTATAGAGGCGTAAGGAAGCATTACACCTTATGGAAATCGGTTTTACCAGACGAAACTATATTGGGTTTGTATTCAACGCCGTTAGAAGCGGCCATAGTCAGAGAACGTTTTTTGCATGAACATCGTGATGAATTTAAAGAAGTTGAGAGATATTTGAACGGAGTTGATCTTGCCCCCGGAGTCACGATTAATACTTACAGAAAACCTAAAAAAGTCAAACCCCAAAAGCACCAACCGCGTTACGGCAAGTATGTTTATCGTAACCGACATCATAATAGTTTTTTTGTAAGGATTGGGAAATATCAATCAAAATGCTTTCCTTTTCATTCTTATGCAATTGCTCACAGGGATGAATATTTGCAAAACAATTTA…	P067	405	NA	-1	49606	50010
A-Lfl4000033	26852	27415	1	hypothetical protein	MTDKYLYYSTGSIKKINPHWVSEQLAAEGYTMLSTYESINKPFKILCPNGHHNKISFNNWNQGKRCSKCSHNNVYRNDGAKSFFAKYGYTIIGGDYKNNRTPMKYVCGKGHINTVTLSALKHYGSTCPYCKGTRTSIEDVRKFLSDRGCELLRPLIEFKHEYKVVYKNPNGEIKQKYWRTIKTTKKL	A-Lf14	ATGACTGACAAATATTTATATTATTCGACAGGATCGATCAAAAAAATCAATCCTCACTGGGTATCCGAACAGTTAGCGGCCGAAGGTTATACAATGCTTTCAACTTATGAAAGCATTAATAAACCTTTTAAAATTCTTTGTCCAAATGGACATCACAACAAAATAAGTTTTAACAATTGGAATCAGGGAAAACGTTGCTCAAAGTGTTCTCACAACAATGTTTATAGGAACGATGGGGCAAAATCTTTTTTTGCAAAATACGGTTATACGATAATCGGAGGAGATTATAAAAATAACCGTACTCCGATGAAATATGTATGTGGGAAAGGACATATCAATACTGTCACTCTTTCAGCTTTGAAACATTACGGATCGACTTGTCCGTACTGTAAAGGAACA…	P066	564	NA	-1	49008	49571
A-Lfl4000034	27412	27759	1	hypothetical protein	MSEPMDTIAIRDDIINRFESCIAESPHVKQRLIKNYFEQCFQHEENARILKVIVTIEKNVMDFEVYSTIVKEYIDFLPGLEDAMNDSLSNNRVPILISFFPNENYELAFPVSIEV	A-Lf14	ATGAGTGAACCAATGGACACGATTGCAATACGTGACGATATTATCAATCGATTTGAAAGCTGTATCGCTGAGTCTCCTCATGTCAAACAACGTTTAATTAAAAATTACTTTGAACAATGTTTCCAGCATGAAGAAAACGCTAGAATACTAAAAGTAATTGTCACCATTGAAAAAAATGTGATGGATTTTGAAGTGTACTCAACAATAGTAAAAGAGTATATTGATTTTTTACCGGGATTGGAAGATGCTATGAATGACTCTTTGTCAAATAACCGTGTTCCAATACTGATCAGCTTTTTTCCTAATGAAAATTACGAGTTAGCTTTTCCTGTAAGTATAGAGGTTTAA	P065	348	NA	-1	48664	49011
A-Lfl4000035	27764	28006	1	ASCH domain protein	MAMRHELKTVNPWFTDVIEGRKDFEVRKNDRGYSVGDLLVLREWTGNNYTARKVEKVVKYVLRGEDFPEGIKPGYVVLGF	A-Lf14	ATGGCCATGAGACACGAGTTAAAAACTGTAAATCCTTGGTTTACCGATGTGATAGAAGGTAGAAAAGATTTTGAAGTAAGGAAAAATGACAGGGGTTATTCTGTTGGCGATCTGTTAGTATTACGGGAGTGGACAGGAAACAACTACACGGCGAGAAAAGTCGAGAAAGTTGTAAAATATGTTTTACGTGGTGAAGACTTCCCAGAAGGTATAAAACCTGGATACGTTGTGTTAGGTTTCTGA	P064	243	NA	-1	48417	48659
A-Lfl4000036	28137	28568	1	hypothetical protein	MKIDVEDFRKIVDEWNCDLVVNKNHTRSHKYFVIDRKTTEILVSTSVLEDAQRRFTTVCDRWKKKYIDSARLTDIKDGGFSYSGNVVINGKDVTIYYNLFSDEWYCLEIPRRFQSFMSAYKYALDMFDKSTTEENMNSIKQTA	A-Lf14	ATGAAAATCGACGTTGAAGACTTTAGAAAAATTGTTGATGAGTGGAACTGTGATCTAGTTGTCAATAAAAACCATACTAGAAGTCACAAATATTTTGTGATAGATCGTAAAACCACAGAAATACTTGTCAGCACTTCCGTACTTGAAGACGCTCAAAGACGGTTTACAACCGTGTGCGATCGCTGGAAAAAGAAATACATAGATTCAGCACGTTTGACAGATATTAAAGATGGGGGATTTAGTTATAGTGGAAACGTTGTAATAAACGGCAAAGACGTTACCATCTATTACAATTTGTTTAGTGATGAATGGTACTGTTTAGAGATTCCCAGACGTTTCCAATCGTTTATGAGTGCTTATAAATATGCTTTGGATATGTTCGATAAATCGACAACAGAA…	P063	432	NA	-1	47855	48286
A-Lfl4000037	28588	28806	1	hypothetical protein	MVSTYFAIYIDDQNIADYDYQIVNSCIQLNIGDKIEIKTKKLTMRVEVFEIENIIDIWEVDSFERCYKCKPV	A-Lf14	ATGGTTTCAACGTATTTTGCTATTTACATAGATGATCAAAATATTGCAGATTATGATTATCAAATTGTAAATTCTTGCATACAGTTAAATATTGGAGATAAAATCGAAATAAAAACTAAAAAATTAACAATGCGTGTTGAAGTGTTTGAAATTGAAAACATAATAGACATTTGGGAAGTAGATTCTTTTGAAAGATGCTACAAGTGTAAACCTGTGTAA	P110	219	NA	-1	47617	47835
A-Lfl4000038	28921	29457	1	hypothetical protein	MKTTFIFNDVQVNLTDAFKKRIRLFAQMVYKLDYCPTIRQLEKLFGLKLVKPRGIGANLRQYHLNWMTAYKTIETDLEVSEENQYQFATRMDVELKAAIAKYNLSGSGKLTSSTEYRFDVYSRNAKGLLVCIGYFHSDFLNKKLAISFTSNGKRQAIVNVGHACHKMIGVFQKQPVGV	A-Lf14	ATGAAAACCACATTTATTTTTAACGATGTTCAAGTAAATTTGACGGACGCTTTCAAAAAAAGAATCAGATTGTTTGCACAAATGGTTTACAAATTAGATTACTGTCCGACAATTAGACAACTTGAAAAATTGTTCGGTCTGAAATTGGTTAAACCGCGTGGGATCGGTGCTAATTTGCGCCAATACCATTTAAATTGGATGACAGCTTATAAAACGATTGAAACCGATTTAGAAGTGTCTGAAGAAAACCAATATCAATTTGCCACACGTATGGATGTTGAATTAAAAGCGGCTATCGCTAAATATAATTTGTCTGGTAGCGGTAAACTTACCAGTAGCACCGAATATCGTTTCGACGTTTATAGCAGAAATGCCAAAGGTTTGCTGGTTTGTATAGGA…	P062	537	NA	-1	46966	47502
A-Lfl4000039	29459	29695	1	hypothetical protein	MKNIKDLPSVNNEYSIELISGCWYNAVIDSKFNVVIKLRFYSISITETKSLVYLFFDEKEEGHFLNTNEIKQYRLKLI	A-Lf14	ATGAAAAACATTAAAGATTTGCCATCTGTGAATAATGAGTACTCTATAGAACTCATTAGTGGGTGTTGGTACAACGCAGTAATTGACAGTAAATTCAACGTGGTCATCAAGCTTAGATTTTATTCTATAAGCATCACAGAAACCAAAAGTTTGGTGTATCTTTTCTTCGATGAAAAAGAGGAGGGACATTTTTTAAATACGAATGAGATCAAACAATACAGACTGAAGTTGATTTAG	P060	237	NA	-1	46728	46964
A-Lfl4000040	29854	30627	1	hypothetical protein	MTRLTVKSVTEYAQANGYELEVRNGTKDKYHIRVAGECPETTMFSATYRTLNEIMLCINEGYLLDGQSEPVEFEVVESYLNDSGELPTFQEVATAIVPYGYELHRNNGQFFTESKAPYIYFKDGESEYALHVTYFLDRIVESVEENYYFKINNQRFQQISSELSKIGDHSGENLTGNETLSDRLSMLEKRLINAVEQRRANVRQICSEIGQMVRNWSSGQGFGNTVKRVTRKVARHAKRFYTILTERVSPKGHVGIF	A-Lf14	ATGACACGCTTAACAGTCAAATCGGTTACAGAATACGCTCAAGCTAACGGATACGAATTAGAAGTAAGAAACGGTACAAAAGATAAATATCATATTCGTGTTGCTGGTGAGTGTCCAGAGACAACAATGTTTTCAGCTACTTACAGAACGCTCAATGAGATCATGCTTTGCATCAACGAAGGTTATTTACTCGACGGTCAAAGCGAACCAGTGGAATTTGAAGTTGTTGAAAGTTATCTCAATGACTCCGGGGAACTACCAACGTTTCAAGAAGTCGCTACGGCGATCGTTCCTTATGGTTACGAATTGCATCGCAACAATGGACAGTTTTTTACAGAATCGAAAGCTCCTTACATCTATTTTAAAGATGGTGAGTCTGAATATGCGTTACACGTTACA…	P059	774	NA	-1	45796	46569
A-Lfl4000041	30682	30891	1	hypothetical protein	MNLITDTEYTVTVNAELDLTLTFKFVSVEIDEKEICFVFERDGKTYKFVENQVRQLLNLPKNPITRRGF	A-Lf14	ATGAATTTGATCACCGATACAGAATACACGGTTACGGTAAATGCTGAACTGGACTTAACTTTAACTTTCAAGTTTGTGTCAGTGGAAATAGACGAAAAAGAAATATGTTTTGTTTTTGAAAGAGACGGAAAAACATACAAATTTGTCGAAAACCAAGTAAGACAGTTGTTGAATTTGCCAAAAAATCCAATAACTAGAAGAGGTTTTTAA	P111	210	NA	-1	45532	45741
A-Lfl4000042	30955	31338	1	hypothetical protein	MNTVEKLYILADAIKNETDKIQKRGMSDDAAIALLGAKIQDDQNYIIEMLSERLNDRLSVVKNVLKRITLTLKYVQLIENLKKEWAVLVDQAGNIALDKNFKSTNPDETFDTAMRKICISHIEKEGF	A-Lf14	ATGAACACTGTAGAAAAGCTTTACATATTAGCCGATGCTATAAAGAACGAAACGGACAAAATACAAAAACGTGGAATGTCGGACGATGCGGCGATCGCGTTGTTAGGAGCGAAAATACAAGACGATCAAAATTACATCATAGAAATGTTGAGCGAAAGATTAAATGATCGTTTATCGGTCGTTAAAAATGTTTTGAAGCGGATCACGTTGACCTTAAAATATGTTCAATTGATTGAGAATCTAAAAAAAGAATGGGCAGTTTTAGTCGATCAAGCTGGTAATATAGCGCTAGACAAAAACTTTAAATCTACCAACCCAGACGAAACATTCGATACAGCAATGAGAAAGATTTGCATAAGTCATATTGAAAAAGAAGGTTTTTAA	P112	384	NA	-1	45085	45468
A-Lfl4000043	31377	31994	1	DNA N-6-adenine-methyltransferase	MVSHHGSCLKNEHYTPRAIFDYIHCVSGEIDLDVASDEIGNRAARAKKYFTKDDDGYTKNWEGNIVFCNPPGRTKDTMHLPGQSEWFLKMVNQHRAGNFVEGWFIGYSIELLCKVGYNAFDYCLCVPQPGKLTGNTHMVSGMGRIMFDAYDPETDERVRQKSPMHGNVIIYLPPMNHKFSNVQIVKFLNVFKKLGAVHISTDYQK	A-Lf14	ATGGTTTCACATCACGGATCATGTCTCAAAAATGAACATTACACACCACGAGCTATTTTTGATTATATACACTGTGTAAGTGGTGAAATAGATTTAGACGTGGCAAGCGATGAAATAGGCAACAGAGCGGCCAGAGCTAAAAAGTATTTTACGAAAGATGATGACGGATATACAAAAAACTGGGAAGGTAATATTGTATTCTGCAATCCGCCGGGAAGAACTAAAGACACGATGCACTTACCAGGACAATCCGAGTGGTTTTTAAAAATGGTTAATCAACATCGTGCCGGGAATTTTGTTGAAGGATGGTTTATCGGTTACAGTATTGAATTGTTGTGTAAAGTTGGTTACAACGCTTTTGATTATTGTTTATGTGTTCCACAACCAGGAAAATTGACA…	P057	618	NA	-1	44429	45046
A-Lfl4000044	32005	32343	1	hypothetical protein	LSTAFGYNVFASSYPYFSNVFTSRFPYLGIYKMIDFLLDVLKVLFIIYMVVFVTTFVMIESIFVIIGDDFDLTPEQRKYAKRWDNHRKHWEAFKIACKWPKILINAMMDGEL	A-Lf14	TTGTCTACTGCTTTTGGTTATAATGTTTTTGCTTCATCCTACCCTTATTTCAGCAACGTTTTTACTAGTCGGTTTCCTTATCTGGGTATTTACAAAATGATTGATTTTCTTTTGGATGTTTTAAAAGTGCTTTTCATCATTTATATGGTGGTTTTTGTAACAACATTTGTTATGATTGAATCGATTTTCGTGATTATTGGCGATGATTTCGATTTGACACCAGAACAGCGAAAATATGCTAAACGATGGGACAATCATAGAAAGCACTGGGAAGCGTTTAAAATCGCTTGCAAGTGGCCTAAAATACTAATAAATGCGATGATGGATGGTGAATTATGA	P056	339	1 TMP	-1	44080	44418
A-Lfl4000045	32340	32594	1	hypothetical protein	MIQFLINAFLFYVTVAFLIFLVYTYFEFQNSFPLFTFYIYPKMREDFKEMIREMNRDYDLQKRSIIFFWPLYLTLFAFFGIANR	A-Lf14	ATGATTCAATTTCTGATAAACGCTTTTTTGTTTTACGTGACTGTTGCTTTTTTGATATTTCTTGTGTACACATACTTTGAATTTCAGAACAGTTTTCCTCTTTTCACCTTTTACATTTATCCAAAAATGAGAGAAGATTTTAAAGAGATGATACGAGAAATGAATAGAGACTATGATCTACAAAAAAGAAGCATAATCTTTTTCTGGCCTTTATATTTGACTCTATTTGCATTTTTTGGAATAGCAAATAGATAG	P055	255	2 TMP	-1	43829	44083
A-Lfl4000046	32762	32929	1	hypothetical protein	MEDLSKEIKALKDSIMSLKKELSEKKQKLSELKNQQKIYITELVQELPQVIYDPE	A-Lf14	ATGGAAGATTTATCCAAAGAAATAAAAGCATTAAAAGATAGCATTATGTCTCTTAAAAAAGAGTTGTCAGAGAAAAAACAAAAATTATCAGAGTTGAAAAACCAACAGAAAATTTACATCACTGAATTAGTACAAGAATTGCCCCAAGTAATTTATGATCCAGAATAA	P113	168	NA	-1	43494	43661
A-Lfl4000047	33354	33869	1	hypothetical protein	MTITFRNKHAKNPRADKKVTPMRERIENWINNNQSMFNGEPKLQLHQIKRIESELLANYGDVSNITDEVLENYFKLKLYFPRTPYVKILIDKAIKLTKQLDEDKDDMIDAETLYSTITKISEFADSTIYAWFKRLNANFCTIGVYHTNTVVMVVYLALVKDAKDSKKLPMV	A-Lf14	ATGACTATCACATTCAGAAACAAACACGCCAAAAACCCCCGTGCGGATAAAAAAGTTACGCCGATGCGGGAAAGGATCGAAAATTGGATCAACAATAATCAGTCCATGTTTAACGGTGAACCAAAATTACAGTTGCATCAAATCAAAAGGATTGAAAGCGAATTATTAGCCAATTACGGTGATGTATCAAATATTACCGATGAAGTTCTGGAAAACTATTTCAAATTGAAATTGTATTTTCCCCGTACACCATACGTTAAAATTTTGATCGATAAAGCTATAAAACTCACTAAACAGCTAGATGAAGACAAAGACGATATGATCGATGCTGAAACACTGTACAGTACCATCACAAAAATTTCAGAATTTGCCGATTCAACTATATACGCATGGTTCAAA…	P051	516	NA	-1	42554	43069
A-Lfl4000048	34004	34585	1	hypothetical protein	MKNSNVPLIRTRLHRKGVTGLSADEIKTALDNNNDDIDATVSELFSKHQTAIATTESDSGVSPESEEDFKSLLKINNNDDETVAMIKSEAGSMGLTIPVNHINDIATSVKQSRTYQSDKLKAIKSALIAYIDWQHEQSSNEAVETIKEVKEHATNKAVEFNNKMVGELSEFFRQSEQNSAEFADELIKALSVG	A-Lf14	ATGAAAAACTCAAACGTTCCTTTAATTCGTACCAGACTGCACCGTAAAGGTGTAACAGGATTGTCAGCAGACGAGATTAAAACAGCTTTAGATAACAACAATGATGACATTGACGCTACAGTGTCAGAATTGTTTTCCAAGCATCAGACAGCGATCGCAACTACCGAAAGTGACTCCGGTGTTTCCCCGGAGTCAGAAGAGGATTTTAAATCGTTGTTAAAAATTAACAATAACGATGATGAAACGGTTGCAATGATTAAATCAGAAGCGGGATCAATGGGTCTAACCATCCCCGTCAATCACATCAATGATATTGCAACTTCTGTCAAACAGTCTCGTACATACCAAAGCGACAAATTAAAAGCGATTAAAAGCGCTTTAATAGCTTACATAGATTGG…	P050	582	NA	-1	41838	42419
A-Lfl4000049	34578	34769	1	hypothetical protein	LVEKNIKKDRDNAIAILCYTVITVMIFYTIGIIVYGGQRTGTDKNTNGYERIFEDRGENLPSI	A-Lf14	TTGGTTGAAAAAAATATCAAAAAAGATCGTGATAACGCGATCGCTATTCTTTGTTACACGGTTATCACGGTCATGATTTTTTATACAATAGGGATTATCGTTTATGGAGGACAAAGAACAGGAACAGATAAAAATACAAATGGATACGAAAGGATTTTTGAAGATAGAGGGGAGAATCTCCCCTCAATCTAA	P114	192	1 TMP	-1	41654	41845
A-Lfl4000050	34789	34971	1	hypothetical protein	MQQAEYYRLKASQETKSVDEQTTVIVVSFMLLLTFMILSVSNKIGNSFKQQNTTEIIYVR	A-Lf14	ATGCAACAGGCTGAATATTACAGATTAAAAGCCAGCCAAGAAACAAAAAGCGTTGATGAACAAACAACGGTAATAGTAGTTTCGTTCATGCTTTTACTCACTTTTATGATTTTGTCTGTAAGTAACAAAATTGGTAACAGTTTCAAACAACAAAACACCACGGAGATCATTTATGTTCGGTGA	P049	183	1 TMP	-1	41452	41634
A-Lfl4000051	34961	35413	1	hypothetical protein	MFGDNHSYNGSNTNGSAIIKSGYDVAALAGDTEKLKPTFQNALNIGSLKDANEKGIYQAAKDAGTLRGLGVMFKNYSREKLNTAKAALSLRNAALNHQKQAAGLELQWQQGSARHLQGMSETLMQLGIVQENHAGFTTYCDTADRLLKGL	A-Lf14	ATGTTCGGTGACAATCATTCTTACAACGGATCAAACACAAACGGTTCGGCAATTATCAAATCCGGTTATGATGTTGCCGCGCTTGCAGGTGACACGGAAAAGCTCAAGCCAACTTTCCAAAACGCTTTAAACATTGGCAGTTTGAAAGATGCGAACGAAAAGGGTATATACCAAGCAGCCAAAGACGCTGGAACGTTACGCGGTTTGGGGGTAATGTTCAAAAATTACAGCCGTGAAAAACTTAACACGGCCAAAGCCGCTTTAAGTCTGAGAAATGCAGCGTTAAACCATCAAAAACAAGCGGCCGGCTTAGAGTTACAATGGCAACAAGGATCGGCAAGACATTTACAGGGAATGTCAGAGACTTTAATGCAGCTTGGTATCGTCCAAGAAAACCAC…	P048	453	NA	-1	41010	41462
A-Lfl4000052	35531	35725	1	hypothetical protein	MYHYHVDFTCGKIKNYARFTLKRKILVGTYDVCMMEIRNRIKAAYKAGFDEIVIIHSFQLLEHN	A-Lf14	ATGTATCATTATCACGTTGACTTTACTTGTGGAAAAATCAAAAATTACGCAAGATTCACATTAAAGCGTAAGATACTTGTCGGTACTTACGATGTTTGTATGATGGAAATACGCAACCGAATAAAAGCAGCTTATAAAGCTGGTTTTGATGAAATTGTTATCATTCACAGTTTTCAATTATTGGAGCATAACTGA	P047	195	NA	-1	40698	40892
A-Lfl4000053	35725	36000	1	hypothetical protein	MKYFLRFGTYTAIATTTLLGVINPQFRLICGVFVAGYLLYAGSDTYKIAIEHYEEHRRYYKDSFIYAISRNALDIGCFCLSLAVAVFLAIA	A-Lf14	ATGAAATACTTTTTACGCTTTGGTACATATACGGCGATCGCTACAACCACTTTACTCGGTGTAATCAATCCACAATTCAGATTGATTTGTGGTGTGTTTGTTGCAGGTTATCTTTTATACGCTGGTAGCGATACGTATAAAATTGCTATAGAACATTACGAAGAACATCGACGTTACTATAAAGATTCGTTCATCTATGCGATTTCTCGCAATGCTTTAGATATTGGATGCTTTTGTCTGTCGTTGGCGGTTGCTGTTTTTTTGGCGATCGCTTGA	P046	276	3 TMP	-1	40423	40698
A-Lfl4000054	36042	36233	1	hypothetical protein	MYYYHVAFQSYDQGEHIGREMLFLTEKITSSNYDNCLKVMETVLKNKYGYESVITHFQLLEDV	A-Lf14	ATGTATTACTATCACGTAGCTTTCCAAAGTTATGATCAGGGTGAACATATTGGAAGAGAAATGTTATTTTTGACTGAAAAAATAACATCATCCAATTACGATAATTGTTTGAAAGTGATGGAAACGGTTTTAAAAAATAAATATGGTTACGAATCTGTTATAACTCATTTTCAATTATTGGAGGACGTATGA	P115	192	NA	-1	40190	40381
A-Lfl4000055	36230	37813	1	hypothetical protein	MKKPLGGFLKSEIDNKYIEARKKLLLIKTLGIVSVGLFTAAVANPKQPKYDLVGQLGFSSLFSLVAAYICKENDDLFTQYDTFVKMNREHKKNEISLNFGKAMIVNEVANEIDLASRLQNLPAPAQIRYINKYALQGLLTPVIDPPESSYSAFSADENGKYGISLDSDLRELERKTEIDLSWIDSAFVNSSKIVVGAKGSGKSVYLRYEAARWLIENPSGYLLIVDPHYDRRVESKHWLCDLDQKIVMKKFLAKSKETRNHGEENEWRGYLYHLGNAWIELQRRIDDSGDDFDDDTIPDYRPVKIIIDELENIKSTCNEAEFKQILKLIDCIQNEGRKYRYEITVGMHGLKKETTGLDSTTVAQMNWFLFEKACYDPTTKFPADFDSREIKEISKTIST…	A-Lf14	ATGAAAAAACCGCTAGGGGGTTTCTTAAAATCGGAAATCGATAATAAATATATAGAAGCTCGTAAAAAGCTTTTACTCATCAAAACTCTGGGTATAGTGTCTGTCGGTTTATTCACGGCGGCGGTAGCCAACCCAAAACAACCAAAATATGATTTAGTCGGTCAACTTGGATTTAGTTCTTTGTTTTCTCTGGTAGCTGCATATATTTGTAAAGAAAATGACGATCTCTTTACACAATATGACACGTTTGTAAAAATGAATCGTGAGCATAAGAAAAACGAAATATCGCTTAATTTTGGTAAAGCGATGATAGTAAACGAAGTGGCAAACGAGATTGATTTAGCATCAAGATTGCAAAATTTGCCAGCGCCGGCACAAATACGTTATATCAATAAATAT…	P045	1584	2 TMP	-1	38610	40193
A-Lfl4000056	37963	39045	1	hypothetical protein	MQTVFLGTCWDSVKSIDILAQAGYNIEKETKGIIKLEHLLPEEQNIFNGLISLLDLKYGEDVTNVGLSIFNEDWQYVYFTYPAVGIGDKDQLGLMIGCSNATEKSAFLPMVFTPGKDDESGDYHLVTPKGKKVKVGLTSIPGSDNKTRHYLMIKNKSFIFNIPFKSASDDLSTGFVNSAFDDGTFHECCKSFMKSGVKFSTMFKKSFLDGYFPENGVILVLGKGKISESEQYGRSSIWEVINSSHPDLVVLDATKETPGEMELKDAGTIFCSSACSASKHLFAGKSGQDPYIIWVKARNPNNINHLPLHDGYQIALVPPKFKAKFPDMLEKAKQIALGNFSANMKAISGSVVEDPALADF	A-Lf14	ATGCAAACAGTATTTTTGGGTACTTGTTGGGATTCCGTGAAATCTATTGACATTTTAGCTCAAGCGGGATACAACATCGAAAAAGAAACCAAAGGTATTATAAAGCTTGAACATCTGTTGCCAGAGGAACAAAACATTTTTAACGGTTTAATATCTTTACTTGATTTAAAATATGGTGAAGACGTGACAAACGTAGGTTTGTCAATTTTTAATGAAGATTGGCAGTATGTGTATTTCACTTATCCTGCCGTTGGTATAGGCGACAAAGATCAGCTAGGATTAATGATCGGTTGTTCCAACGCTACCGAAAAATCTGCATTTCTACCGATGGTTTTTACTCCCGGTAAAGATGATGAAAGCGGTGATTATCATTTAGTTACACCTAAAGGCAAAAAAGTC…	P044	1083	NA	-1	37378	38460
A-Lfl4000057	39174	39344	1	hypothetical protein	MKDQYLGKQFTWNQTTYTVKRMMGDNNKAYVCKPLKGSTDTRERWFMIDELNELIK	A-Lf14	ATGAAAGATCAGTATTTAGGCAAACAGTTCACATGGAACCAAACCACATACACGGTTAAACGTATGATGGGTGATAACAACAAAGCTTATGTGTGTAAACCCTTGAAAGGTTCCACAGACACCAGAGAACGATGGTTTATGATTGACGAATTGAACGAGCTTATCAAGTAA	P116	171	NA	-1	37079	37249
A-Lfl4000058	39403	39741	1	hypothetical protein	MWIEETRKFINSFTNFEELVNALHDLVKCYDPDPKNKGFRIFATLEESYDFNGGLFVSTGDISGFLIDVSNEKGVIIVRFRETGRMGLRHAESKKIKTHGWIEPWTNETVNI	A-Lf14	ATGTGGATCGAAGAAACTAGAAAATTTATCAACTCTTTCACTAACTTTGAAGAACTGGTCAATGCTTTACATGACTTAGTAAAGTGTTATGATCCAGATCCTAAAAACAAAGGTTTCAGAATTTTTGCAACATTGGAAGAATCTTATGATTTTAATGGTGGTTTATTTGTTAGCACTGGGGATATATCTGGATTTTTAATCGATGTCAGTAATGAAAAAGGTGTTATTATTGTACGCTTTCGTGAAACTGGGCGTATGGGTTTAAGACACGCTGAATCGAAAAAAATCAAAACGCACGGATGGATCGAACCTTGGACAAATGAAACGGTGAATATTTAA	P117	339	NA	-1	36682	37020
A-Lfl4000059	39755	40072	1	hypothetical protein	VKRTYTYDGFTGTKKQWSERLGIGYQSMLRRFEKHWPDRPEKVFSTVYLTPGANMLNETCKDAKKRSDESMKKQYKYCQLLAIRKHLKQQLTSVEKQIKDNGFGR	A-Lf14	GTGAAACGGACATACACTTACGATGGATTCACAGGCACTAAAAAACAATGGTCAGAACGTTTAGGTATTGGTTATCAGTCAATGTTAAGAAGGTTTGAAAAACATTGGCCTGATAGACCAGAGAAAGTCTTTTCAACCGTTTATCTGACTCCGGGGGCAAATATGCTAAACGAAACTTGTAAAGATGCTAAAAAACGTTCTGACGAGTCGATGAAAAAGCAATACAAATATTGTCAATTACTAGCCATAAGGAAACACCTTAAACAGCAATTGACAAGCGTTGAAAAGCAAATTAAGGATAACGGGTTTGGAAGATGA	P043	318	NA	-1	36351	36668
A-Lfl4000060	40069	40272	1	hypothetical protein	MKEHIIRKYRQSNIKQQVKELTAQNYVVVVAHFRDGERFQIMSKHETKGQAWRTIGSKRNCFIVERG	A-Lf14	ATGAAAGAACACATAATTAGAAAATACAGACAGTCAAACATCAAACAGCAAGTAAAGGAATTGACCGCGCAAAACTATGTTGTTGTTGTGGCTCATTTTAGGGACGGTGAACGCTTTCAAATCATGTCAAAACATGAAACAAAGGGGCAAGCTTGGCGAACAATCGGAAGCAAAAGAAACTGTTTCATAGTTGAAAGGGGTTAA	P118	204	NA	-1	36151	36354
A-Lfl4000061	40274	40489	1	hypothetical protein	MDIIFFETDCIYCFYSDYETLCNLGKVLESVNLDPSWYETEALNVQSEKDLQALINAYCDLMNIKPNWNKK	A-Lf14	ATGGATATCATTTTTTTTGAAACTGATTGTATTTATTGTTTTTACTCGGATTATGAAACACTGTGCAACCTTGGCAAAGTTTTAGAATCTGTTAATCTTGATCCGTCATGGTATGAAACGGAAGCGTTAAACGTCCAATCTGAAAAAGACTTGCAAGCGCTGATAAACGCTTATTGTGATTTGATGAACATTAAACCTAATTGGAACAAAAAATGA	P042	216	NA	-1	35934	36149
A-Lfl4000062	40486	41901	1	helicase	MIELREYQQEQVNKLNSATVNTCIQSPTGTGKSVVIKAFTERVNDSGGKVAIIAPNRELVQNIAGYFPAIATTAYTGVKPDLSKSIFVSTYKSYAKYFKAFDHDLMLVDEGYHLPSPTIKRIMEQSKGLTHCLTATPNRLDGAGLFPQMRDLHLSPQVSWFINQGFLSDYELITSECPLFKSSDGSDDLSSQSKLFGSTPECFKTVQMYHEQCYNQRAIVFVSGQEHGQKLVNMFNDSGVYAEFVTAKTDKKHRDRCLELFKLGHLKVLININLFTEGVNIPECENVFLCRFTYSTALYLQMVGRLLRVAPGVNKTLFDLSGNVWYHGTPKSTFEWSIHGQPWRESDNRSSVNFKCEKCDTDLINKKFVKHSTTVCCLECGHVNYLEPPEEKDTKHRFL…	A-Lf14	ATGATAGAACTCAGAGAATATCAACAAGAACAAGTCAACAAACTAAATTCAGCAACCGTCAATACCTGCATTCAATCCCCAACGGGAACGGGTAAGAGCGTCGTTATAAAGGCATTTACAGAGCGTGTAAATGACTCCGGGGGTAAAGTTGCTATAATCGCTCCTAACCGCGAATTGGTGCAAAATATCGCCGGATACTTTCCAGCGATCGCGACAACAGCTTACACCGGAGTCAAACCGGATTTATCAAAAAGTATTTTTGTTTCGACATACAAAAGTTATGCAAAATACTTTAAAGCTTTTGACCATGACTTGATGTTAGTTGATGAAGGTTATCACCTGCCATCACCGACGATTAAACGTATTATGGAACAGTCCAAAGGATTGACCCATTGTCTG…	P041	1416	NA	-1	34522	35937
A-Lfl4000063	41894	42094	1	hypothetical protein	MNKVTALSIRRESIEKLVIYNIDAKEALENGKVPESNVNIVRKIIARNNVAVAKFIEDVIFASELN	A-Lf14	ATGAATAAAGTTACAGCGCTTTCAATCCGTCGAGAATCAATAGAAAAGCTGGTGATTTATAACATAGATGCTAAAGAAGCATTAGAAAATGGTAAAGTGCCTGAAAGCAACGTTAACATTGTTAGAAAAATAATAGCTCGTAACAATGTTGCAGTTGCCAAGTTTATCGAAGATGTGATATTTGCCAGTGAGTTAAATTGA	P040	201	NA	-1	34329	34529
A-Lfl4000064	42128	42343	1	hypothetical protein	MSTSDIDIEIYGEWENDPAKFWNWCDHCDRITTVISATDPYIDELYKDDDEMDNTESNWCRVCYCKRKEEI	A-Lf14	ATGTCAACAAGCGATATAGATATCGAAATTTACGGAGAATGGGAAAACGATCCGGCAAAATTTTGGAATTGGTGCGATCATTGCGATCGCATCACCACGGTTATTTCCGCCACCGATCCTTACATCGATGAGCTTTACAAAGATGACGACGAGATGGATAATACAGAATCTAACTGGTGTAGGGTTTGTTATTGTAAACGTAAAGAAGAGATATAA	P039	216	NA	-1	34080	34295
A-Lfl4000065	42356	42544	1	hypothetical protein	MGNYETMKKLDQAIDYLESAINNLESIENTNRTLEVIADQMLVQLNALQNQQKIYKDAWENE	A-Lf14	ATGGGAAATTACGAAACAATGAAAAAGCTTGACCAAGCTATTGACTATCTAGAATCAGCTATAAATAATTTAGAGTCAATAGAAAACACTAACAGAACTTTGGAAGTAATAGCCGATCAAATGTTAGTACAATTGAACGCATTACAAAACCAACAAAAGATTTATAAGGACGCTTGGGAAAACGAATGA	P038	189	NA	-1	33879	34067
A-Lfl4000066	42571	44577	1	DNA polymerase	MTPGKLGVFYDIIIVVHLLQIYPMKLFEYKIENGTITIDESSLDLFSYYEEPIPDWEPTADIKPFNELTRLGVDIETTGLNPENNRIMLIGIYNESGKYHIFHDEDERKMLISFIGVLNRKKPDILEGFNHIEFDLKFIIKRCEKLRIPHPFTIANKETTIRTAQIFGKPAVFNHIWIKYEDAPRSQHTAVIDLYYAVLQWDFVKRKLTKHTLKQSVLQMGLRKEARTELSYSQMMEEWENRDENNLTLLKEYLQFDLEDTKLLGDFLIPAIYYQKLFIPDWKLQSIATAGFGSKWNDILKREYCLEPLPVSDTRKHFEGGLTDSIYGFFENVIKIDVASLYPSIMLTYGVCSSKDRHKVTLSILKYMKNKRMEAKAIANDSGVDESVKLESENMSGAM…	A-Lf14	ATGACTCCGGGGAAACTCGGAGTTTTTTATGATATAATCATTGTTGTACATCTATTGCAGATATACCCCATGAAATTATTTGAATACAAGATAGAGAATGGAACCATCACCATTGATGAAAGTTCTTTAGATTTGTTCTCGTATTATGAGGAACCGATCCCAGACTGGGAACCAACAGCAGATATAAAACCTTTCAACGAGCTTACACGTCTAGGTGTAGACATCGAAACCACTGGATTAAATCCTGAAAACAATCGCATCATGTTAATCGGGATTTATAACGAATCAGGGAAATATCACATTTTCCATGATGAAGATGAAAGAAAAATGTTAATATCTTTCATCGGCGTGTTAAATCGTAAAAAACCTGACATTCTTGAAGGTTTCAATCATATTGAA…	P037	2007	NA	-1	31846	33852
A-Lfl4000067	44710	45132	1	hypothetical protein	MTRLTFAKVSEEFQSMGYTLKKEKRGYSCEVSDKFQNLKDAQEWLYNQVSLAKESEIEENEEFQPVIYVFSVRNCREEHVKKIIDTMSTDIGEECVKQDEYGLIQALVYELDPENGDNQSLYISEWVDKFPCIALVKTIY	A-Lf14	ATGACACGCTTAACATTCGCTAAAGTTTCAGAAGAATTTCAATCAATGGGATACACTCTCAAAAAAGAAAAAAGAGGTTACAGTTGTGAAGTATCTGATAAATTTCAAAATTTAAAAGATGCTCAAGAGTGGTTATACAATCAAGTGTCTTTGGCAAAAGAATCTGAGATTGAAGAAAATGAAGAGTTTCAACCAGTGATTTATGTATTTAGCGTGAGAAATTGTCGAGAAGAACACGTCAAAAAGATAATTGATACCATGAGTACGGATATAGGCGAAGAATGTGTAAAACAGGATGAATACGGACTAATACAGGCTTTAGTATACGAATTAGATCCAGAAAACGGGGATAATCAAAGCTTATACATATCGGAGTGGGTTGATAAATTCCCATGTATA…	P035	423	NA	-1	31291	31713
A-Lfl4000068	45298	45558	1	hypothetical protein	MKSKLETLSSIKQSSYSLCQRKFKINKEDVKEFTKWMIKLCVSDDPDCSTTDLKYREPWARGYYTLLNTEQDGRANFVKKILKIKY	A-Lf14	ATGAAAAGCAAACTAGAAACACTTAGCAGCATCAAACAATCCTCATATTCTTTATGCCAACGTAAATTCAAAATAAACAAAGAAGATGTTAAAGAGTTTACAAAATGGATGATAAAGCTTTGTGTCAGCGACGATCCGGACTGCTCAACAACGGATCTCAAGTATAGGGAACCTTGGGCTAGAGGTTATTACACACTGTTAAACACCGAACAGGATGGTAGAGCGAATTTTGTCAAAAAGATTTTGAAGATTAAGTATTAA	P119	261	NA	-1	30865	31125
A-Lfl4000069	45581	45727	1	hypothetical protein	MKQYKVVWIENAKIRQYSTNNQNKALMLAEYLDLMCVWCRFYDNDQII	A-Lf14	ATGAAACAATACAAGGTTGTGTGGATAGAAAACGCCAAAATAAGGCAGTACAGCACAAACAATCAAAACAAAGCTTTGATGTTAGCTGAATACTTGGATCTCATGTGTGTATGGTGCAGATTTTACGACAATGATCAAATAATATAA	P120	147	NA	-1	30696	30842
A-Lfl4000070	45775	46917	-1	tail collar protein	MVRKVFNDGDILYAEDVNIIGQPFVDGQDLLGHGVKVDDNSLDDSPDQIKARFYAWYNRFRVTIQSGLTLSVTQGSISVSGNIISFPPQTINAINNSNSFVWIGKTDVDPAIALRVSQTLPEVCIPLARIIAASGSITSVTDLRDVSVDVLPPSIPDAVPVGSTIISLIPPTSPAPAGYLELLNTPQNVSRITYSALFAEWGTYYGVGDGSTTFGVPGTGGRYLRLVGTGLEVGSMGGNNQITIPANALPTHQHGIPATTHTHGVNQTPHGHGVSQVPHGHTIEDFGHSHAIPFSALLDQGSGGAFDYGSSPFDGGVKTTHSQTGITINGSNANIGIEGSNANISIQSASTGLTATGNAGNGAAFQHDQPYLIFRVFVKV	A-Lf14	ATGGTACGTAAAGTTTTTAATGACGGTGATATTTTATATGCTGAAGATGTCAACATTATCGGCCAACCGTTTGTTGATGGTCAGGATCTATTAGGTCATGGTGTAAAAGTTGATGATAACAGCTTAGACGATTCACCTGATCAGATAAAAGCTCGCTTTTATGCGTGGTATAATCGCTTTCGAGTGACTATACAAAGCGGTTTAACGCTTTCAGTCACACAAGGTAGTATCAGCGTTTCAGGTAACATTATAAGTTTTCCGCCTCAAACCATCAACGCCATAAACAATTCTAATAGTTTTGTTTGGATAGGTAAAACTGATGTAGATCCGGCGATCGCTTTAAGAGTTTCACAAACTTTACCGGAAGTCTGTATACCATTGGCGCGGATAATCGCCGCA…	P034	1143	NA	1	29506	30648
A-Lfl4000071	46952	48343	-1	tail fiber	MTNIVGRIGFLTTGKLGIKLRGVLIDESTTPNTTYLPGIETFFDITSNLLTSVSYPETETQNITATFSIYAVDGVDPVFPALLSFDAIVPNVASVEFDVLAPTGVVNNQLDTSALRIAKVIANDPALAQKVAGAPYPRGAYSASETYLYGEMVSYFGKNYISKSLSPIINILPTVTDSWYELVITLPPEVSVIATGSDTAYGVGWNGSLLVPTQNAVYDKIVTVDAAIATANTNIVTLGSAKADLSYVNSELSADQALINALLSDKADLSYVNTQLGSKANLNSPAFTGNPTAPTPPTSDSDTSLATTAYVKANLLDYPTNATLTNGLNAKANLNSPALVGVPTTPTPGLNSNNSSIVNSAWVQALLNAAQDDQGRFYVRVGYGIAVKFGSTVVTTAGE…	A-Lf14	ATGACTAACATTGTAGGACGGATAGGTTTTTTGACCACTGGTAAATTAGGTATAAAATTACGTGGTGTTTTGATAGACGAAAGTACCACACCAAACACCACTTATCTACCGGGTATTGAGACTTTTTTTGATATTACATCCAACCTGCTAACAAGCGTTTCTTATCCTGAAACGGAAACGCAGAACATAACAGCGACTTTCAGTATTTACGCGGTTGACGGTGTTGATCCGGTTTTCCCTGCTTTGCTTTCTTTTGATGCAATCGTGCCAAATGTCGCATCAGTAGAATTTGACGTTTTAGCTCCTACCGGAGTAGTTAACAATCAATTAGATACTTCAGCTTTAAGGATCGCCAAAGTAATAGCCAACGATCCAGCATTAGCTCAAAAAGTTGCTGGC…	P033	1392	NA	1	28080	29471
A-Lfl4000072	48346	48921	-1	tail collar protein	MSKDAFVAWNVDRRPIYSRMPKEQVGTSYHDYIATDWLTAYWDKIFVECYDKLEDLPRQFNPLECDEEYLDFLAPLCGWTAPYWSGDYPPESKRVLLANSYSLIWKDKGSLTVLSFVLNALFINHRIFVPGSFILGISQVSEDTLGAAGWEFEILLPRNYPENGYEFRLTRKIAELFSPLWCRYQIRYENI	A-Lf14	ATGAGTAAAGACGCTTTTGTGGCTTGGAACGTTGACAGACGGCCTATTTATTCCCGTATGCCTAAAGAGCAAGTAGGAACCTCCTATCATGACTATATAGCTACTGATTGGTTAACGGCATACTGGGATAAAATTTTTGTAGAGTGCTACGACAAACTTGAAGACTTACCGCGCCAATTTAATCCATTAGAATGTGATGAAGAGTATTTAGACTTTCTTGCGCCGTTGTGTGGATGGACAGCGCCTTATTGGTCAGGGGATTATCCCCCGGAGTCAAAACGGGTTTTATTAGCTAATTCTTATTCGCTGATATGGAAAGATAAAGGCAGTTTAACCGTGCTGTCATTCGTTTTAAATGCGTTGTTTATTAATCATAGAATATTTGTTCCGGGATCGTTC…	P032	576	NA	1	27502	28077
A-Lfl4000073	48921	50093	-1	baseplate wedge protein	MTTDLNAPQLVIDDYEGLIIDSLVHTNIVSNGEFTDLDPSGFMRPFAGTMAYAGSELLYKANLTSIAAAKSFFKNVLGVPEDAGTKATTTLQFGLSASLSTDFIVPINFQVSDLSGTLRYYTLNNLVIPAGATFGTVEAIAEDIGEKYNVSANFIDQYSTPLTYLQYVTNIRPASNGRSGETIDNLIERCAQIIRIRNPVSALDFEQLAQLTMGDGSRCKAIGLLGINKIVTDPQPGVVHLFLLDVNGNPADPVLISTVGATLQPRIMLGTRLLISPMEVLNIELELIALSDSSKTFQQLANDVLSALEIFFDPVNLTPGEPVLIEEVKFAIRSVGGLSISYLQMNDNAINVPMPNQWTIPRFSYIGFELTDSEGTVYRDNVITVTNPEE	A-Lf14	ATGACAACTGATTTAAACGCGCCACAATTAGTTATAGACGATTATGAAGGACTGATCATTGATTCTTTGGTACACACCAATATTGTAAGCAATGGTGAATTTACTGATCTAGATCCTTCCGGTTTCATGAGACCTTTTGCTGGGACAATGGCCTATGCGGGATCTGAACTGTTATACAAAGCAAATTTAACATCAATAGCGGCTGCAAAGTCTTTTTTTAAGAATGTTCTGGGAGTACCTGAAGACGCTGGAACCAAAGCCACAACCACTTTACAGTTTGGTTTATCCGCTTCATTGTCCACAGATTTTATAGTACCTATAAATTTTCAGGTTTCCGATTTATCAGGCACTTTAAGATATTACACACTTAATAATTTGGTGATACCTGCCGGGGCAACT…	P031	1173	NA	1	26330	27502
A-Lfl4000074	50137	50475	-1	hypothetical protein	MYVYPPRIINGTLYKSSDLAEYTRGKILQTLSIVRGELVADPFFGVPLRLFSSVKDYQSDVAKIEVILKEEIPEADFIVTGDISNNGLVTLTVYWAYLGTENIETFEIDINF	A-Lf14	ATGTATGTATATCCGCCTAGAATAATAAACGGTACTTTATATAAATCTTCAGATTTAGCAGAATATACACGCGGTAAGATTTTGCAAACGCTGTCAATAGTTCGGGGTGAGTTAGTAGCCGATCCGTTTTTTGGCGTTCCTTTGCGGTTGTTTTCCAGTGTCAAAGATTATCAATCAGACGTTGCAAAAATCGAAGTTATTTTAAAAGAAGAAATACCAGAAGCTGATTTTATTGTGACTGGTGATATTTCAAATAATGGACTGGTAACACTAACGGTTTATTGGGCTTATCTGGGAACTGAAAATATTGAAACTTTTGAAATTGATATAAATTTTTAA	P030	339	NA	1	25948	26286
A-Lfl4000075	50546	50875	1	hypothetical protein	MFSLTINIYNGDQGSATAEINTKLDGVINKMSELGDKLTQLEELTQVEVQEFQTIILKIGDLRSTVEAQTAEIARLNELVASGGAVTPEELQRLDNLIASVSAIVNPDV	A-Lf14	ATGTTTTCACTCACCATTAACATTTACAATGGTGATCAAGGTTCTGCAACAGCAGAGATCAACACCAAACTAGACGGAGTAATAAATAAAATGTCTGAATTAGGCGATAAGCTTACTCAATTGGAAGAACTTACTCAAGTAGAAGTACAAGAATTTCAAACTATCATCCTGAAAATCGGTGATCTTCGTTCTACCGTAGAAGCTCAAACGGCAGAGATCGCACGATTAAACGAATTGGTTGCTTCTGGTGGTGCTGTTACTCCTGAAGAATTACAACGTCTGGACAATTTAATCGCCAGCGTTTCAGCTATCGTCAATCCTGACGTATAA	P029	330	Signal peptide	-1	25548	25877
A-Lfl4000076	51066	51524	1	hypothetical protein	MVKNVWQALYDAIAGNSDVNDDGWTDYQMSTESSEEYQARILAKAESDSHLRKRTNNQLNDPDEGLKQANIEQARREGLISKEEYNRELKKLRKDKWNNTGIDDNYVLCEDGIHRKPSEILQQNQEKKEEPKRTRKTMKLIDGYMTEVEEEY	A-Lf14	ATGGTCAAAAATGTATGGCAAGCGCTTTATGATGCTATTGCAGGTAACAGTGATGTGAATGATGACGGATGGACAGATTACCAAATGTCTACAGAGTCATCAGAAGAGTACCAAGCAAGAATCTTGGCGAAAGCTGAGAGTGACTCTCATCTGAGAAAACGTACCAACAATCAACTAAACGATCCCGATGAAGGACTGAAACAAGCAAACATTGAACAAGCCAGAAGAGAAGGACTGATAAGTAAAGAAGAATACAATAGAGAACTGAAAAAATTGCGAAAAGACAAATGGAATAATACAGGAATTGATGATAATTACGTGCTGTGTGAGGACGGTATACACAGGAAACCATCGGAAATATTACAGCAAAATCAAGAAAAGAAGGAAGAACCAAAAAGA…	P026	459	NA	-1	24899	25357
A-Lfl4000077	51576	51713	1	hypothetical protein	MKENLLVLLMFCLLMVAGVGTFETIKDHIKQTVWSPNYPETEILK	A-Lf14	ATGAAAGAAAATTTACTAGTTTTATTAATGTTCTGTCTTTTAATGGTTGCGGGAGTGGGAACATTTGAAACCATAAAAGACCACATAAAACAGACGGTTTGGTCGCCAAACTATCCAGAGACAGAAATACTAAAATAA	P126	138	Signal peptide	-1	24710	24847
A-Lfl4000078	51759	52571	-1	valine-glycine repeat protein G1	MIVDEFSSVYECLLYCYRMVKRSEQLNGRRVFPILSVVTNNNDPEGRRRIKIADPLFSNLIESNWIRPIRVSQNQDNPLPQIDQMVIVWFVDGDSEKGYYLPIINDANPSRDKDDPVNDSAVRIEGNNTLTVDKNDYLSIGGNQTVAIAGEQNTNVDGNLIENIGGDIDQNVTGKIEVRSESTILIEADGTIIIKNDSGAFISLGGNGEVLIQDSQGRKIRLGGAFNSTWDLNGLPMQFINATSITIANKQIATVGAVDSRGDTIVSKGW	A-Lf14	ATGATAGTTGATGAATTTTCTAGTGTTTATGAATGTTTGTTGTATTGTTATCGGATGGTCAAGCGGTCAGAACAATTAAACGGTCGCAGAGTTTTTCCTATCCTTTCGGTTGTAACAAACAACAACGATCCAGAAGGACGTAGACGCATTAAAATCGCTGATCCGTTGTTCAGCAACTTAATAGAATCAAATTGGATACGACCGATCAGAGTTTCTCAAAACCAAGATAATCCGTTACCACAAATCGATCAAATGGTTATCGTCTGGTTTGTTGACGGTGATAGCGAGAAAGGTTATTACCTGCCTATCATCAACGATGCCAACCCCTCACGCGATAAAGATGATCCAGTAAATGATAGTGCTGTAAGGATTGAAGGCAATAACACACTGACAGTTGAT…	P025	813	NA	1	23852	24664
A-Lfl4000079	52992	53117	-1	hypothetical protein	VQSTLHALHENVTFWICNVTTGFLVPKSQKISPPESIFNAF	A-Lf14	GTGCAGTCTACGTTACACGCGTTACATGAAAATGTAACATTTTGGATTTGTAACGTAACAACCGGGTTTTTAGTACCAAAATCACAAAAAATCTCTCCCCCGGAGTCAATTTTTAACGCTTTTTAA	P127	126	NA	1	23306	23431
A-Lfl4000080	53521	54162	1	thymidylate kinase	MNAFHNEKPYAGTFIVFEGVDGAGKTTQANKAYEYLTGLKIPTILTCQPGGTQFGANLRAWLKSDVELTPRLQFLGMILDRLEHVNNVIRPKLLEGFVVLCDRFTWSTIAYQGALGLHRDIIDTMNLFATSDGCNIDPDLILLYDTELQIVRERMKSDDRYEKMDDKFYTEVVKTYNRLGYYWDNCRVIDGRNSIDQVWEKTKNHIDKTLKLC	A-Lf14	ATGAACGCTTTTCACAATGAAAAACCCTACGCTGGCACTTTTATAGTTTTTGAAGGTGTAGACGGTGCAGGGAAGACCACACAGGCTAACAAAGCTTATGAATATCTGACAGGATTGAAAATCCCTACTATCCTCACTTGTCAGCCTGGAGGAACACAGTTTGGAGCTAATTTAAGAGCGTGGTTAAAGTCTGATGTGGAACTTACACCACGTTTGCAGTTTTTAGGGATGATTCTGGACAGACTAGAACACGTTAATAATGTAATCCGTCCAAAGTTGCTAGAAGGCTTTGTGGTACTGTGCGATCGCTTTACATGGTCTACAATCGCTTATCAAGGTGCTTTAGGACTACATCGTGACATCATCGACACTATGAATCTATTTGCGACTTCTGACGGT…	P071	642	NA	1	54362	55003
A-Lfl4000081	54390	54668	1	hypothetical protein	MEVKKIVTDFFQINILNGNDYTFQIGHGNVIDREEYEADNDVWHSYDPWSKTECLLEHISTEFFSQGNTDDIEPLLESLVYQVEEYFTPESL	A-Lf14	ATGGAAGTAAAAAAGATAGTAACCGATTTTTTCCAGATAAACATACTTAACGGCAATGATTATACTTTCCAGATTGGTCACGGTAACGTAATCGATAGGGAAGAATATGAAGCTGATAATGATGTTTGGCATTCATACGATCCGTGGTCAAAAACTGAATGCTTGTTAGAACATATTTCGACAGAATTTTTCAGTCAAGGCAACACTGACGATATCGAACCTTTGTTAGAATCGCTCGTTTATCAAGTTGAAGAATATTTTACACCGGAGTCACTATGA	P121	279	NA	1	55231	55509
A-Lfl4000082	54665	55039	1	hypothetical protein	MKLSKVLLSAAIAFTALTSALPAIAQRPYIVSVQGKTNDGSTLKYDLTSLSNDRGDAVSFTYYIIDKTGDLRQNRGTTFCANRNGWLVPTIDGRGFWVDATSNASNNMLESICRNVFPNWYYRR	A-Lf14	ATGAAATTATCGAAAGTTTTGTTAAGTGCTGCAATTGCTTTTACAGCGTTGACAAGCGCATTACCAGCGATCGCACAAAGACCGTATATTGTTTCAGTGCAAGGAAAAACTAACGATGGTTCGACATTAAAATATGATTTAACATCGTTGAGTAATGATAGAGGTGACGCTGTAAGTTTCACTTATTACATCATAGATAAAACAGGAGATTTGCGACAAAACAGAGGAACAACTTTTTGCGCTAATAGAAACGGTTGGTTAGTGCCTACAATCGACGGTAGGGGTTTTTGGGTCGATGCAACGTCTAACGCTTCCAACAATATGCTTGAAAGCATTTGTCGTAATGTTTTCCCTAACTGGTATTACAGACGATGA	P072	375	Signal peptide	1	55506	55880
A-Lfl4000083	55036	55473	1	hypothetical protein	MKKTARRIEIDRQRYGDRNNPEYIDLCHRVHKSCGDRCVICTKKSTEIHHAYYLGYKKDSPGVNVFAVCRKCHLSQCHRYNTWLPNHDEPMKSRNTEEFITYLHQRFLFVSQAFNGIKGVMSYYGMPKNKRGNTRSHRVSDKNKK	A-Lf14	ATGAAAAAAACTGCAAGACGAATTGAAATAGATCGACAACGATACGGAGATCGTAACAATCCTGAATATATCGATTTGTGTCACCGTGTGCATAAAAGTTGTGGCGATCGGTGTGTTATTTGCACAAAAAAATCTACAGAAATACATCACGCTTATTATCTGGGATACAAAAAAGATTCCCCCGGAGTCAATGTGTTTGCCGTATGTAGAAAATGTCATCTTTCACAGTGTCACCGATATAATACTTGGTTGCCAAATCATGATGAACCGATGAAAAGCCGTAATACGGAGGAATTTATAACTTATTTGCATCAAAGATTTTTGTTTGTTAGTCAAGCTTTTAACGGGATAAAAGGAGTAATGAGTTACTATGGAATGCCAAAAAACAAACGCGGAAAT…	P073	438	NA	1	55877	56314
A-Lfl4000084	55475	55567	1	hypothetical protein	LDHYPGTLVQKSAVKRGVDTAIFWLEVLQK	A-Lf14	TTGGATCATTATCCCGGTACACTGGTACAAAAAAGCGCTGTTAAACGTGGTGTGGACACCGCAATATTTTGGTTGGAGGTTTTACAAAAATGA	P122	93	NA	1	56316	56408
A-Lfl4000085	55564	55923	1	hypothetical protein	MIIGGKNYSEKYLNRLLQIGTFSQHFDKLLEKPDQYYEALKSKPKAIAKLKQLILFPLPSDFLVCCKEFDFLVLRATSKQKIDIVVHYEHRLNRICSLIDKFQLSLTENEKQILKKLGR	A-Lf14	ATGATCATCGGTGGTAAAAATTACAGCGAAAAATATCTTAATCGGTTGTTGCAAATTGGTACGTTTTCACAACACTTTGACAAATTATTGGAAAAACCTGATCAATACTATGAAGCGTTGAAAAGCAAACCGAAAGCGATCGCCAAACTGAAACAATTGATTTTGTTTCCTTTGCCGTCAGATTTTCTTGTATGCTGTAAAGAATTTGATTTTTTGGTGTTACGTGCAACATCAAAACAAAAAATTGACATCGTTGTACATTATGAACATAGATTAAATAGAATCTGTTCATTGATTGATAAATTTCAATTATCATTGACCGAAAACGAAAAACAAATCCTAAAGAAACTGGGAAGATGA	P074	360	NA	1	56405	56764
A-Lfl4000086	55920	56201	1	hypothetical protein	MSKALRDYQRSSYDMFLTNIIEKVLNAKESHFNFKVYAKSNRQLVKQSFIRCLKKRLIPFTVDGFIFQFMQKTVKITYVYKNPMDRIVYVFSH	A-Lf14	ATGAGCAAAGCTTTGAGAGATTATCAACGAAGTTCCTATGATATGTTTTTGACAAATATCATAGAGAAAGTGTTAAACGCTAAAGAGTCGCATTTCAATTTTAAAGTTTATGCAAAATCTAATAGACAATTAGTAAAACAGTCTTTTATTAGATGTCTCAAAAAACGTTTAATACCTTTTACAGTTGACGGTTTTATTTTTCAATTCATGCAGAAAACTGTAAAAATAACGTATGTTTATAAAAATCCTATGGATCGGATCGTTTATGTCTTTAGCCATTAG	P123	282	NA	1	56761	57042
A-Lfl4000087	56185	57231	1	DNA-cytosine methyltransferase	MSLAISLFTGVGGFDLGVERAGFKVAVANEIDVKTASTYAQNFKTPMIVEDVRNLTSGNLRDSGGIGQRDVDLVFGGSPCQGFSQAGCRNESDSRNFLIFEYQRIVLDIYPKYFIFENVSELLNKRNETLLNSFISGFEEEGYRIVPIRVLNASNHDIPQSRKRVFMLGYRYDRKAPQYPPESKQRFTLHDAISDLKFANGYEKLKYVDRVPELVYDEPSNYVKDYHKLLGSNIDFTEVIRPITASKFTRHDYQTTKNFLSYPQGYFEKFGRRIKPLYNDVCNTIVTKQRLIHPIYPRYLTVRECARIQSFPDDFNFYPTIEQGQKEVGNAVPPLLGFQLASEILKVL	A-Lf14	ATGTCTTTAGCCATTAGTTTGTTTACAGGTGTCGGAGGTTTTGATCTTGGTGTGGAAAGAGCAGGTTTTAAAGTCGCCGTAGCAAATGAAATAGACGTTAAAACCGCTTCAACATACGCGCAAAACTTCAAAACGCCGATGATCGTTGAAGATGTTAGAAATTTAACATCAGGAAATTTACGTGATTCCGGGGGGATCGGTCAACGTGATGTTGATCTGGTTTTTGGCGGTTCACCTTGTCAGGGATTCAGTCAAGCCGGATGTAGAAACGAGAGTGACTCTAGAAATTTTTTGATTTTTGAATATCAACGGATAGTGCTTGATATCTATCCAAAGTATTTTATCTTTGAGAACGTTTCAGAGTTGCTTAATAAACGTAATGAAACGCTGTTAAATAGC…	P075	1047	NA	1	57026	58072
A-Lfl4000088	57228	57641	1	hypothetical protein	MKNYTIFDVLQFLEFESGNIDFYDLPKRIRELRYEFWQTSKLLKAWWKLRKLSPNMTNIDWFFSRFFGGHISIGRLTIFGCNAMMYMITCRSKTGTWCFRPPCFNTHWEIWTWGCLYFSPNGTPGHEDAVILWDDKY	A-Lf14	ATGAAGAATTACACAATTTTTGATGTTTTACAGTTTTTAGAATTTGAATCAGGTAACATTGATTTTTACGATTTGCCCAAAAGAATTAGAGAATTGAGGTATGAATTTTGGCAAACTTCCAAGCTGTTAAAAGCTTGGTGGAAATTGAGAAAACTTTCACCGAACATGACGAATATTGATTGGTTTTTCAGTCGTTTTTTTGGTGGTCACATCTCTATCGGACGCTTGACGATTTTCGGATGTAACGCAATGATGTATATGATCACTTGTAGAAGTAAAACAGGTACATGGTGTTTTAGGCCGCCATGTTTTAATACACATTGGGAGATTTGGACATGGGGATGTCTTTATTTTTCACCAAACGGTACACCCGGACATGAAGACGCTGTTATACTTTGG…	P076	414	NA	1	58069	58482
A-Lfl4000089	57641	57796	1	hypothetical protein	MVIEFTLEQLKAVSKALHAAKNDQHIGLLPQGCTALKKIDKAIANNTSYLA	A-Lf14	ATGGTAATAGAATTTACTTTGGAACAATTAAAAGCTGTTTCTAAAGCTTTACACGCTGCAAAAAATGATCAGCATATTGGGTTACTGCCCCAAGGATGCACCGCATTGAAAAAGATTGACAAAGCGATCGCGAATAATACAAGTTATTTGGCGTGA	P077	156	NA	1	58482	58637
A-Lfl4000090	57827	58039	1	hypothetical protein	MSLDWLKNHVVNNWKTTLIGLISAFAGFVAFAPDQFPKPLVMLAQYINAGGAVGLGIYAYDSKRKALETR	A-Lf14	ATGAGTCTTGATTGGTTAAAAAATCATGTGGTTAATAATTGGAAAACCACGTTAATCGGTTTAATATCCGCTTTCGCCGGGTTTGTAGCTTTTGCACCGGATCAGTTTCCTAAACCTCTTGTGATGCTTGCACAATATATTAATGCTGGTGGCGCTGTCGGTTTGGGTATTTACGCTTATGATAGCAAACGAAAAGCTTTAGAAACTAGATAG	P078	213	2 TMP	1	58668	58880
A-Lfl4000091	58099	58518	-1	hypothetical protein	MLTECYSRSSETVKIDGVWREINTYRRCMAGMVENHTYGFMYMGTMPNGWEPSPTDLVMHDVPGNDNFDDTLGYVRFGESSIVNGTVTFFNVYFFGMLNRTVTRSFNVDEFEFMPDGWEPVPGVHKILWEDVKDENVYE	A-Lf14	ATGTTAACAGAATGTTACTCAAGATCATCAGAGACCGTTAAAATTGACGGAGTTTGGCGAGAGATAAACACGTACAGAAGATGTATGGCCGGTATGGTTGAAAATCATACATACGGATTTATGTATATGGGTACTATGCCTAATGGATGGGAACCATCACCGACTGATTTAGTCATGCACGATGTACCGGGGAACGATAATTTTGATGATACTCTGGGATATGTAAGGTTTGGAGAATCTTCAATCGTTAACGGTACTGTGACATTTTTTAATGTTTACTTTTTCGGTATGCTAAACCGTACAGTAACCAGAAGTTTTAATGTTGATGAATTTGAGTTCATGCCTGATGGATGGGAACCTGTACCCGGAGTACATAAAATACTTTGGGAAGATGTAAAA…	P079	420	NA	-1	58940	59359
A-Lfl4000092	58518	59108	-1	hypothetical protein	MRRLQLNNNGDIEASYERKLIGGLNRWYNFDNNYLKIAIGGGASTANIIRYYHLRVPRPVQINNAAISISTSVTGNFRFGLYDNIVIDNAFTPGNLILDFGEQSTSGTGFKTFPISTLDLPDGDYFGATVSSANTGYMGIVNTSAMGDVFGLPTPGNNATACYTQSFTYGALPLVAAPSGEDTRYPSILFRVVGFL	A-Lf14	ATGAGAAGATTACAATTAAACAACAACGGTGATATAGAAGCCAGTTACGAAAGAAAATTGATAGGAGGATTAAATCGTTGGTACAACTTTGATAATAATTATTTAAAAATCGCGATCGGCGGCGGAGCATCTACAGCCAACATAATAAGATATTATCATTTGAGAGTACCACGCCCAGTTCAAATAAACAACGCAGCGATATCTATTTCAACCAGCGTCACCGGAAATTTTAGATTTGGATTGTATGACAATATAGTGATTGATAATGCTTTCACACCCGGCAACCTGATTTTAGATTTTGGTGAACAGTCAACAAGCGGAACAGGATTTAAAACATTTCCAATATCCACGCTTGATCTACCGGACGGTGATTATTTTGGGGCTACGGTTTCCAGCGCA…	P080	591	NA	-1	59359	59949
A-Lfl4000093	59162	59668	-1	hypothetical protein	MSSNRFIGIANGIQTLFTALSASSGAGDASKIVMTDSSGKIDPTLMPSGIGAATKSVLASEALVAGDFVNIYNNTGTLNVRKADSSNNRPANGFVLAPFASSANATVYLQGENTGRTGLTPGSIYFLSTAGGVTTTAPTASGNIIQQLGYSTGATAINFEYNDPIVIA	A-Lf14	ATGTCTTCCAATAGATTCATCGGCATTGCAAACGGGATTCAAACACTATTTACAGCGTTGAGCGCTTCAAGTGGTGCAGGTGACGCTAGTAAAATTGTGATGACTGACAGTTCAGGTAAAATTGATCCAACTTTAATGCCGTCTGGTATCGGTGCAGCAACAAAAAGCGTTTTAGCGTCTGAAGCGTTAGTTGCTGGCGATTTTGTAAACATTTACAATAACACAGGTACGCTAAACGTGCGAAAAGCTGACAGTAGTAACAATAGACCCGCCAACGGGTTTGTTTTGGCTCCTTTCGCTAGTTCGGCAAACGCTACAGTCTATTTACAGGGTGAAAACACTGGTAGAACGGGATTGACTCCGGGGAGTATTTATTTTCTAAGCACAGCCGGGGGAGTG…	P081	507	NA	-1	60003	60509
A-Lfl4000094	59680	61650	-1	alkaline phosphatase PhoD	MGTIAATVKITGTVTSARLAVSTSPTMSPRVFSSNIIPDSNNLCKFIVSGLADNTLYYIQTEVNGNLKGNIGKAKTPPTTATSFKFCLASCARDNSNHPIFDAIRGFNPDFFLHTGDIHYEDINVNNVALYHAAYDLVFSLTKQEQLYREFPMFYMWDDHDYADDNSDSTNVSRPAAIQAYRERVPFSNLLIDTSTATSPVYYKFNYGRCVFLVCDSRSQKSPSSDADTSSKTVLGSSQKAWLINEFNNNPNKFIFVIFSFGWMGSASATQDYWAGYHTERVEIANAIKAAGIANRMMILSGDMHGCAYDSGANSDYATGGGAGIRVVQAAPLDQTTSVKGSGWSSGAFSSFQQQFGQIEVIDTGNADIQVNVSLHRYNVSEPSLTTLLFSANNTITIG…	A-Lf14	ATGGGTACAATAGCGGCTACTGTAAAAATAACGGGAACGGTGACAAGCGCTAGACTGGCCGTATCAACTAGTCCCACGATGTCGCCTAGAGTTTTTTCCAGCAACATAATACCCGATAGCAACAATCTTTGTAAATTTATCGTGTCTGGACTGGCCGATAATACATTATATTATATACAAACAGAAGTTAACGGCAACTTAAAAGGTAATATAGGCAAAGCTAAAACACCACCTACAACCGCTACAAGCTTTAAATTTTGTTTAGCATCATGCGCGAGAGATAACAGCAATCATCCAATATTTGATGCTATACGCGGTTTTAATCCCGATTTTTTCTTACATACCGGAGATATACATTACGAAGATATAAACGTCAACAATGTAGCATTGTATCATGCT…	P124	1971	NA	-1	60521	62491
A-Lfl4000095	61652	62215	-1	capsid fiber protein	MSVQKFLGFENDVKLFTALSASSGAGDASKILCTNSLGIIDTSFLPSVDAGQIVVTGLATDDLIAGDFINFYNSGGNINVRKADNNTGKIANGFVLETFLNSDIATVYVQGENNLRSGLIPGTIYFLSSEGSVTLTAPNGSGKFVQKLGIAIDENTINFEYNRPVYISDLIGNVDDTTVVSMWTSVY	A-Lf14	ATGTCTGTTCAGAAATTTTTAGGATTTGAAAACGATGTAAAATTATTCACGGCGTTGAGTGCTTCAAGTGGTGCAGGTGACGCTAGTAAAATTTTATGCACAAACTCATTGGGCATAATCGATACAAGTTTTTTACCGTCTGTTGATGCTGGACAAATCGTTGTAACAGGTTTGGCAACTGACGATCTTATAGCTGGTGATTTTATCAATTTTTATAATAGCGGCGGAAACATAAATGTTAGAAAAGCCGACAATAACACCGGGAAAATAGCAAACGGTTTTGTATTAGAAACTTTTCTCAATTCGGACATCGCAACGGTTTATGTGCAAGGTGAAAATAATTTAAGATCAGGTTTAATACCAGGAACAATATATTTTTTATCAAGTGAAGGATCTGTA…	P081	564	Signal peptide	-1	62493	63056
A-Lfl4000096	62217	62942	-1	hypothetical protein	MRRLRGTIKHFDDQPWINVSVYLTLINGTFNSVNQYPIDTQQKKTDENGEFIFNVIPNVGVEQSYYILTTPDRKKHAFTIPDGTSDIEFSVVRETGIIATDPEYTNVLNYLEDYIDDAIANIQASSVIAEVFSCGQTISALKAVRYDPVTGKVFYVSSSDETHLNKCVGVSSQSGVLNDNIQVVTSGYLTDQSWNWSVGSPIFFDSGGTLTHTPGSNYYQVIAIPVTNNKILISVEQPIKL	A-Lf14	ATGAGGAGATTGAGAGGCACTATTAAACACTTTGACGATCAACCGTGGATCAATGTTTCCGTTTATCTGACATTGATTAATGGAACGTTTAATAGTGTCAATCAATATCCGATAGACACACAACAAAAAAAGACAGATGAAAACGGTGAATTTATTTTCAATGTCATTCCTAACGTTGGAGTAGAACAAAGTTACTACATACTCACCACACCGGATAGGAAAAAACACGCTTTTACTATACCAGATGGAACAAGCGACATTGAATTTAGTGTGGTTCGAGAAACCGGGATCATAGCAACTGATCCAGAATATACAAACGTTTTAAATTATTTGGAAGATTATATCGATGATGCGATCGCAAATATACAAGCATCATCGGTAATAGCTGAAGTTTTTAGC…	P082	726	NA	-1	63058	63783
A-Lfl4000097	63005	63283	1	hypothetical protein	MDNRDLLQSLKNISERLEELEKPPEKMTFSNSIALIGLIITIIAGFSSVMFIGVSKVTTLELRLQNTYEEMIELKNEIREIKNNDTQRRSNN	A-Lf14	ATGGATAATAGAGATTTGTTACAGTCGCTCAAAAACATATCAGAGCGATTAGAAGAACTTGAGAAACCGCCAGAAAAAATGACTTTTTCTAATTCGATAGCTTTGATAGGTCTGATAATTACTATCATCGCTGGATTTTCTTCTGTAATGTTTATCGGTGTGAGTAAAGTTACAACTTTAGAATTAAGATTGCAAAATACTTATGAGGAGATGATAGAATTGAAAAATGAAATTAGAGAAATAAAAAACAATGATACTCAACGACGATCAAATAATTGA	P083	279	1 TMP	1	63846	64124
A-Lfl4000098	63255	63854	1	dCTP deaminase	MILNDDQIIELCETQKMIEPYERSLIRFITEEDLKQSKVISYGLSSFGYDIRLSAKEFYTFRHVPGTIVDPKKFNTTNLTPGELFYDENGSYFVIPANSYGLGVAIERLNLPRNITAVCVGKSTYARCGIIANITPAEAGWHGHLTLEFSNSSSADCRIYANEGVVQLLFLEGERCKTSYSDRQGKYQNQPESVVIPRL	A-Lf14	ATGATACTCAACGACGATCAAATAATTGAGCTTTGCGAAACTCAAAAAATGATAGAACCTTATGAGCGATCGCTCATAAGGTTTATTACTGAAGAGGATTTAAAGCAGTCGAAAGTCATCAGCTATGGGTTATCGAGCTTTGGGTACGACATTCGATTGTCGGCAAAAGAGTTTTATACTTTTCGTCATGTTCCAGGTACTATAGTAGATCCTAAAAAATTTAATACTACAAATTTGACTCCGGGGGAATTATTTTATGATGAAAACGGATCGTATTTTGTCATACCTGCTAATAGTTACGGTTTGGGTGTTGCTATTGAGCGCTTAAATTTGCCTAGAAACATTACTGCTGTTTGTGTCGGGAAATCGACCTATGCACGTTGTGGGATAATCGCAAAT…	P084	600	NA	1	64096	64695
A-Lfl4000099	63997	65223	1	hypothetical protein	MITFSDVKEISIESLQENFLSGSFAFCEPEVYVRGSVNQDEVEEKKIQLTFEDDGKKYVEVLEPLTFYQRDGVLYLLNGNNRVNALFQMINTTETKVYEYKLVPYRVLESEPSLEVLEELQVVANDTTNAHSALQLAKRVAATSSRLENVYKAADPKIKKTALNGKVLESLCTIYKRQHHYIRNLLRINEQPETVQNLLENELVSVNTVVEIAKKMPKDASDEYIEEVYGELSAIANGGKITEKTLNEWLNSKKPTPPTTENTENEENTTPAPAITIEDFTTSAIDRFNKLSIIEKQHITPALKPQVSSVVKSGLSLLAGTFDIFTDDESLDLLEDIRALIFNRLGDVDHLVKRAEIAGEEIPNIAKKFNSFNKSVDKLYKAYIEPEQETTVTVIATDD…	A-Lf14	ATGATTACATTTTCAGACGTTAAAGAAATCTCAATCGAATCATTGCAAGAAAATTTCCTATCAGGATCATTTGCTTTTTGCGAACCTGAAGTTTATGTACGTGGTTCCGTCAATCAGGATGAAGTCGAAGAGAAAAAGATTCAATTAACTTTTGAAGATGACGGAAAAAAATATGTAGAAGTTTTAGAACCTCTCACATTTTATCAGCGTGACGGTGTTTTATATCTGTTAAATGGTAACAATCGTGTAAACGCGTTGTTTCAAATGATTAACACGACTGAAACAAAAGTTTATGAATACAAATTAGTACCTTATCGCGTTTTAGAGTCCGAACCATCACTTGAAGTTTTGGAAGAATTGCAAGTGGTTGCGAACGACACAACCAACGCACACAGCGCT…	P085	1227	NA	1	64838	66064
A-Lfl4000100	65329	65796	1	hypothetical protein	LHQLTDKPMKKTAKYSLTSFKLWKNANGKWHFYNAVFDHADKSSLSYMSACKLIQRGWTPYAIAAKPGISSPLQLEMVDTQPLDDYLREKDPVSFVAGECIKEFLNKPVRKYTETFTPESITASDLALQKAIQDYKDGKYVLPHLLKKVLEHHAK	A-Lf14	TTGCATCAGTTGACAGATAAACCGATGAAAAAAACTGCAAAGTATTCTTTAACCTCTTTCAAATTGTGGAAAAACGCTAACGGTAAATGGCATTTCTATAATGCTGTTTTTGACCACGCTGATAAAAGTTCTTTGTCTTACATGAGCGCTTGTAAGCTAATACAAAGAGGTTGGACACCATACGCGATCGCCGCAAAACCTGGAATCTCTTCACCGTTGCAATTAGAAATGGTTGATACTCAACCGTTAGATGATTATCTAAGAGAAAAAGATCCCGTGTCGTTTGTTGCTGGTGAATGTATCAAAGAGTTCTTAAACAAACCTGTCAGAAAATATACTGAAACTTTCACCCCGGAGTCAATAACAGCGTCCGATTTAGCGTTACAAAAAGCCATACAA…	P086	468	NA	1	66170	66637
A-Lfl4000101	65786	66673	1	DNA methylase	MLNKIHLGDCVQIMKSFPNAFMDLTVTSPPYDNLRDYKGYAFDLKALIRELYRCTKIGGVIVWVVGDQTLNGSESGESFRQALSFMEYGFKLNDTMIYKKHHPKPEITGYRYQPTFEYMFVFSKGTPKTFNPLREPCKNAGKSYTSSTKTLKDGSKIGYNSPFIRDTKIKSNIWEYSVGYMQSSKDAIAFEHPAIFPEQLAEDHILSWSDSGETVFDPFMGSGTVAKVAFQLGRNYIGCEISEEYLAIAEKRLSILSPPESINAGDLALQKAREDYKNGRYVLPHLLKKVLENDN	A-Lf14	ATGCTAAATAAAATACATCTTGGCGACTGCGTACAAATAATGAAAAGCTTTCCCAATGCTTTTATGGATTTGACAGTGACTTCACCACCTTATGATAATCTAAGAGATTATAAAGGGTATGCTTTTGATTTAAAAGCGCTTATACGTGAGTTATATCGCTGTACAAAAATCGGTGGTGTGATAGTCTGGGTAGTAGGTGATCAAACACTAAACGGATCAGAAAGCGGTGAAAGTTTCCGTCAAGCGCTTTCGTTCATGGAATACGGTTTCAAGTTGAATGACACGATGATATATAAAAAACATCATCCCAAACCGGAGATCACAGGATACCGATATCAACCAACTTTTGAGTATATGTTTGTGTTTTCCAAAGGAACACCCAAAACTTTCAATCCATTA…	P087	888	NA	1	66627	67514
A-Lfl4000102	66663	67094	1	RusA	MIIKYAFPFPAFPKPRGGIGRYGNMTHSSKGYRQWQKIFLESLSNYHSSGKLFPSDFHCLIFFFYIKPKRGQPPDLENLQGGIQDTLKKAGCITEDNYKIISRYYTDHIVVKDQSRFDLYVVNNHQEKIYVIDKLLPKIDTNN	A-Lf14	ATGATAATTAAATACGCTTTCCCGTTTCCAGCTTTCCCCAAACCACGCGGGGGAATAGGACGTTATGGCAACATGACGCATAGTAGCAAAGGTTACAGACAATGGCAAAAAATCTTTTTAGAGTCACTCTCAAATTATCATAGCTCTGGAAAGTTGTTTCCTAGTGATTTTCATTGTTTGATATTCTTTTTTTACATAAAACCTAAGCGCGGACAACCTCCTGATCTGGAAAATCTTCAAGGTGGTATACAAGACACTTTGAAAAAAGCCGGATGTATAACAGAGGACAATTACAAAATAATTAGCAGATATTACACGGATCACATAGTTGTAAAAGATCAATCACGTTTTGATCTGTATGTGGTTAACAATCACCAAGAAAAGATTTATGTGATTGAT…	P088	432	NA	1	67504	67935
A-Lfl4000103	67133	67483	1	hypothetical protein	MKTVINKERRLKVTYKTVGDKLVLVSPTSYIDPETLEIAVKVLDGKINIDALITNGVDVIDDGESYIEAPDRFWKACGEVKAIVKATEDTFFHKNGTSIYNKNMIIVKRKNEKTKS	A-Lf14	ATGAAAACTGTGATCAATAAAGAACGTCGCTTAAAAGTCACTTACAAAACAGTGGGTGATAAATTGGTTTTGGTGTCACCGACGAGTTATATTGACCCTGAAACGCTGGAAATTGCGGTAAAGGTTCTTGATGGTAAAATAAATATAGATGCTTTGATTACAAACGGCGTAGACGTTATAGACGATGGGGAAAGCTATATAGAAGCGCCAGATCGTTTTTGGAAAGCTTGCGGAGAGGTAAAAGCCATTGTCAAAGCAACCGAAGACACGTTTTTTCATAAAAACGGTACATCGATATACAACAAAAACATGATAATAGTAAAGAGGAAAAATGAAAAAACAAAATCTTGA	P089	351	NA	1	67974	68324
A-Lfl4000104	67464	67634	1	hypothetical protein	MKKQNLDNVMYICLPVSTLCLLFLVCQISLMNPGVKKFYDGFWQGFWSNIHFKLTP	A-Lf14	ATGAAAAAACAAAATCTTGACAACGTGATGTATATTTGTTTACCTGTTTCCACGTTATGTTTATTGTTTTTGGTTTGTCAAATATCTCTGATGAATCCCGGCGTAAAAAAATTTTATGATGGTTTCTGGCAAGGTTTTTGGTCAAACATACACTTCAAATTGACACCATAA	P104	171	1 TMP	1	68305	68475
A-Lfl4000105	67700	68479	-1	thymidylate synthase	MQVRLIARTTGVENTEYQGKSIDEIITGIARISSSREINDLFEEPHKLLRHCIVNGHWSVFTESNLIFEIVTSRAIGRELLRHWSIRPQEFSQRYAEITKFEEIEIRKQSKNNRQSSTEVFDPVIYGDEKLNLEIRASDIIRDALDYCQGSYKTLLNAGVARETARFISPEATETRLIMNGTIREWITTCNQRLHHTAQKECRLIAEAIRDFLLVECPIISKALYNFEDAYHIHILDRVTLEKFGVYQLVKKNDFKKLK	A-Lf14	ATGCAAGTAAGATTGATAGCACGTACCACCGGAGTAGAAAACACGGAGTATCAAGGTAAAAGCATTGATGAGATTATCACAGGCATTGCACGTATTAGCAGCAGTCGAGAGATTAACGATCTTTTTGAAGAACCTCACAAACTGTTAAGACATTGTATTGTTAATGGTCATTGGTCAGTTTTCACAGAATCAAATTTGATATTTGAAATTGTCACAAGTCGTGCAATTGGAAGAGAATTGTTAAGACATTGGAGCATTCGACCGCAGGAATTTAGTCAACGTTACGCAGAGATAACAAAATTTGAAGAGATTGAAATTAGAAAACAATCTAAAAATAATAGACAGTCATCAACAGAGGTTTTTGATCCTGTAATATATGGCGATGAAAAATTAAACCTT…	P090	780	NA	-1	68541	69320
A-Lfl4000106	68523	68840	1	hypothetical protein	MEERQNYFIEVVGNGGITMQILQVYTMFIGFIFESIELIKSDANNLPIALQSLENIIFDAGSIHPDLFVYLNNDKQKFDDLLKSFAKLPETKKTTAKTAIAKDEV	A-Lf14	ATGGAAGAAAGACAAAATTACTTTATAGAAGTTGTCGGGAACGGTGGGATCACTATGCAGATTTTGCAAGTTTATACCATGTTTATCGGTTTCATTTTTGAATCCATAGAATTGATTAAAAGTGATGCCAACAACTTACCAATTGCTTTACAGTCACTTGAAAATATAATTTTTGATGCTGGTTCTATTCATCCTGATTTGTTTGTTTATTTGAACAATGACAAACAAAAATTTGATGATTTGTTAAAAAGTTTTGCAAAATTGCCAGAAACAAAAAAAACGACCGCTAAAACAGCGATCGCCAAAGATGAAGTTTGA	P091	318	NA	1	69364	69681
A-Lfl4000107	68841	69482	-1	hypothetical protein	MSPLSNLLNRYSYPTVDFCDKCRKFTGVRKDGHNLVCRSCDSGEESLLEIKIEPNKAFEKIVKNTESIKAELLTTKKSGNRKLIKKDVLSFVNSLDEPISLKELASFFGVSPQAVRKFFRRDCTAWEFSAQYDPQKREHAIGKHDPDNKLLIILTGLWIIFPSRINIQGLYLLTKLDKKEIVKICQNSEKIGKEKEKGSWRYWLINAHNLYLK	A-Lf14	ATGTCACCATTATCAAACTTGCTCAATCGATATAGTTATCCCACAGTGGATTTTTGTGATAAGTGCAGAAAGTTCACCGGAGTCAGAAAAGACGGTCATAATCTTGTATGCCGTAGTTGTGACTCCGGGGAAGAATCGCTATTAGAAATTAAAATAGAACCCAACAAAGCTTTTGAAAAGATAGTAAAAAACACCGAATCAATAAAAGCTGAATTGTTGACTACTAAAAAAAGTGGCAACCGTAAACTGATTAAAAAAGACGTTTTAAGCTTTGTAAACTCTTTGGATGAACCGATATCATTAAAAGAATTGGCAAGCTTTTTTGGTGTGTCACCACAGGCAGTCAGAAAGTTTTTTAGACGAGACTGCACCGCATGGGAATTCAGCGCTCAATATGAT…	P092	642	NA	-1	69682	70323
A-Lfl4000108	69487	69687	-1	hypothetical protein	MEVWESIKNYLENGADLKDLLIQIEGDENVIYILYGMLKYIDMTGFLEDHQEYLMNYLERQYNLQY	A-Lf14	ATGGAAGTATGGGAAAGTATTAAAAATTACTTAGAAAACGGTGCAGATTTGAAAGATTTGTTGATACAAATAGAAGGAGATGAAAACGTTATCTATATTTTGTATGGAATGTTAAAATATATTGATATGACTGGATTTTTGGAAGATCATCAAGAATACTTGATGAACTATTTGGAACGTCAATACAATTTGCAATACTAA	P093	201	NA	-1	70328	70528
A-Lfl4000109	69721	70095	1	hypothetical protein	MYYNAFQQIIVKNKLKTILRLIKSINVDSLCYHDLVLLNKFILKSLFIFKLTPLSKTVIKLLLESLYKTVESLIVKKIDDNTSSKLDRLILILKMINLKLYENDTNLVKIDKNKITIDDRYKHY	A-Lf14	ATGTATTATAATGCTTTTCAACAAATTATAGTTAAAAATAAATTAAAAACTATCTTACGACTGATAAAGTCGATCAATGTTGATAGTCTTTGTTATCATGATTTGGTTTTGTTGAATAAATTCATTTTAAAATCGCTTTTCATTTTTAAATTGACTCCGTTGAGTAAAACGGTTATCAAATTATTATTAGAGTCACTCTATAAAACTGTTGAGTCTTTGATAGTTAAAAAAATAGATGATAACACATCATCGAAACTTGATAGGTTGATATTGATTTTAAAAATGATTAATTTGAAATTGTATGAAAATGATACAAATTTGGTAAAAATAGACAAAAACAAAATAACGATTGATGATAGATACAAACACTATTGA	P094	375	NA	1	1	375
A-Lfl4000110	70073	70561	1	hypothetical protein	MIDTNTIDIIKEVLEKSGDINAACIAASITRHTFEKWLQLYPTFKDIVTESKEFYKNCLVSDWDIDAIAYTNNLLKGRVVTRSVVKRFVLPKQDLEDDESFSPESLELVELYREEREQTVQPPKWLLERYLPKENVEPIKVQINFADMPNVDDDDPEAKEVE	A-Lf14	ATGATAGATACAAACACTATTGATATTATTAAGGAAGTGTTAGAGAAAAGCGGCGATATAAACGCCGCTTGTATCGCCGCGTCTATCACTCGTCATACGTTTGAAAAATGGTTGCAATTATATCCAACTTTTAAAGATATTGTTACAGAATCTAAAGAGTTTTACAAAAACTGTTTAGTATCTGATTGGGACATCGACGCGATCGCATACACAAACAATCTTTTAAAAGGTCGAGTGGTAACACGTAGCGTTGTTAAACGCTTTGTATTGCCTAAACAGGATTTAGAAGATGATGAAAGCTTTTCCCCGGAGTCATTAGAACTCGTTGAACTTTACAGAGAAGAACGGGAACAAACCGTACAACCGCCAAAATGGTTGTTAGAAAGATATCTACCTAAA…	P095	489	NA	1	353	841
AND75488.1	1	1356	1	terminase large subunit	MDFPIVDSYHPKQGNIVARGIAGTQNSILVCGRGFGKSIAGRGIIYTTAIDYRGMIPPQGKTKLFNVIAMPHLNQAKKIHWSPLEYLFTETELSRLVKNINRSEGTIELIGSLPGIALAGLNDDNGNKIRGWSIPRLVIDEMQDVKPGIWASIKPAVDRCLGRVFISGTPKGKGTPFHRFCKDMTAQGWKYYHYFTEHNPFLPDIERVLAEARLALTEREYNAEYKASWEDFPGQIFDQLQSHHVLAPESFPNNFDSIVMGIDWGDIHPAIAIVGIKDFPYKYYLIDYWQGNPDGTSNSISMDLFIKTCGEYCEKYNIHSTYPDVFQPGNINNIYEFKNSDWVGMRNIVDPDSGDYQRMRTLRVMPSLSLMNRLFSKDRLFIHKGIEDQFRTIIRKQDK…	N1	ATGGATTTCCCAATAGTTGATAGTTATCATCCAAAACAAGGAAACATTGTAGCTAGGGGCATTGCAGGTACACAAAACAGCATTCTTGTGTGTGGTCGTGGTTTCGGCAAATCAATAGCTGGTAGGGGCATAATTTACACCACTGCTATTGATTATCGCGGTATGATTCCGCCGCAAGGCAAAACAAAGCTATTCAACGTAATAGCTATGCCACATCTAAATCAAGCCAAGAAAATCCACTGGTCGCCACTTGAGTATCTGTTTACTGAAACCGAATTATCAAGATTGGTAAAGAATATTAATCGATCTGAAGGTACTATAGAGTTAATCGGTTCGCTTCCAGGTATAGCTCTGGCTGGATTAAATGATGATAATGGTAATAAGATTAGAGGTTGGTCA…	P001	1356	NA	1	871	2226
AND75489.1	1383	2984	1	hypothetical protein	MLYTETLNYKQLSIISDDFKAALPIFKDIQTVAKGGSELDPTDYLLIRDDESPGITKKRVEKFAPENYLGAAIRLQRILQKSGVIEIKPETLPGDIKIWEEFFNKVDKRNSSLKDFVIDVFTEALINKHCYVQIELSKLDFDTVTEAEAEGILNNRKPYYFKIPLQSIMSEKSDGDTIEWIKYKRIDKIENPFDKTKYNMTYVLLDDTHITTWTFYNVIITDSGEVSKIWDQSLSYGQGGYRPIDKDKDKAKPVSFAHNRGKAPVVRYTVDDSLYMSDQVYLAQKMIYGLSMNLFHTAANAGFIQKWIRPYIAGNDTRISKESGGASYIPLPKEALNEIVKKYAESLGDESVIMADFFTFEELAGTSVEMQIGLIDRLAKYIFTSILFNNSRFEQVNSD…	N1	ATGCTTTACACAGAAACACTGAATTATAAACAACTATCAATAATTTCAGATGACTTTAAAGCTGCTTTACCAATCTTTAAAGACATTCAAACTGTTGCTAAAGGTGGATCAGAATTAGATCCGACCGACTATCTTTTGATACGTGACGATGAATCCCCCGGAATCACTAAAAAGCGTGTTGAAAAGTTTGCACCTGAGAATTATTTAGGTGCGGCAATTAGACTGCAAAGGATTTTACAAAAGTCTGGTGTTATTGAAATCAAACCAGAAACACTACCAGGTGATATTAAAATATGGGAAGAGTTTTTTAATAAAGTTGATAAGCGTAATTCATCACTTAAAGATTTCGTCATCGATGTTTTCACAGAAGCATTAATCAACAAACATTGTTATGTTCAA…	P002	1602	NA	1	2253	3854
AND75490.1	3065	3760	1	outer membrane protein	MDLEKDNLNNNDNDQPDDSGENNNEGLDPKLEARLKAIEEGFNNALNGVVKKLEKKLTIPKPEKPPESKEPESKDPETLTIAALKNESQKAIDELRQQLEDERKAREADKRSLFLASVDSQISTAIAKQGFDDPEAALTVFKSMYNLDSWQQGTNGYIIFKPDEESEGKTLESVIKDWSKSPVGKRFFNKNLPNGSGMNEPETNKKAPTSKDIFSRIKQAKEEGFTVQRKR	N1	ATGGATTTAGAAAAAGACAATCTTAATAATAACGATAATGATCAGCCTGATGATTCCGGGGAAAACAATAACGAAGGTTTAGATCCAAAGCTTGAAGCACGTTTAAAAGCGATTGAAGAAGGCTTTAATAATGCTTTGAACGGAGTTGTCAAAAAACTCGAAAAGAAATTGACAATACCAAAACCAGAGAAACCCCCGGAATCAAAAGAACCAGAATCTAAAGATCCCGAAACATTGACAATTGCTGCTTTGAAAAATGAAAGCCAAAAAGCTATTGACGAGCTTAGACAGCAATTGGAAGATGAACGGAAAGCTAGAGAAGCTGATAAGCGTTCTTTGTTTTTAGCTAGTGTTGATAGTCAAATTTCAACAGCGATCGCTAAACAAGGCTTTGATGAT…	P003	696	NA	1	3935	4630
AND75491.1	3770	4858	1	major capsid protein	MPLTTLTPTELLTAKAIDYLANSFLVEAPMLGLLANRVVNQKQKAIEWGAKVAQGVVGGRTRQGALAQDTQGTIKGASLSVPDYYIKHQFQVGKDEIVNSNTIGRISAVRDPVGTAISDAFDVLARKVNQVLYTANGTADTTNFGVFGLNSVAVQTGSYAGLSRVTFPRWKSTLVQGAVPGTPEALATSKLTSVLRTRRTNGVTYKGNQNSRLVMVTTDIIETDVLRTLYGSVVDNQNVDFTRLDKDLLPYVNYMVKGIPVISDIDCPPNTAYLLNLDKIAIYSFDQSDADLSDGKISYIPLRYTSETGDTPSESTLWVRLADVSDEHPDLLSFELSVALQLVAFDPIDSVTKIEDIKNTIP	N1	ATGCCATTAACCACATTAACCCCCACCGAATTATTAACAGCCAAAGCAATAGACTATTTGGCTAATAGCTTCCTGGTGGAAGCACCCATGTTAGGTTTACTAGCAAATAGAGTTGTCAATCAAAAACAAAAAGCTATTGAATGGGGCGCAAAAGTCGCTCAAGGTGTTGTAGGTGGTAGAACCAGACAAGGCGCACTGGCACAAGATACACAAGGAACAATAAAAGGTGCGTCTTTGTCTGTACCTGACTATTACATTAAACACCAGTTTCAAGTGGGTAAAGATGAAATAGTTAATAGTAACACTATTGGTAGAATTAGCGCAGTACGTGACCCTGTTGGAACAGCGATCAGTGATGCTTTTGACGTATTAGCTCGTAAAGTTAATCAGGTTCTTTAT…	P004	1089	NA	1	4640	5728
AND75492.1	4973	5437	1	hypothetical protein	MTIHPLENYYSRFGSSLPTSEFEQMEVEFIAMCIGFPVNQFNFTESIKDRTEMEIFAIRQCLKEILRLDKLGKDSIENRQVVKVEDITMNMNYTVDIKDELANEVKKIARLMRLPVLDNLYVSYDDVEGKLDERGLLTPMNRNTGSYLTGFTVR	N1	ATGACTATACACCCATTAGAAAACTATTATTCAAGATTCGGTTCAAGTTTGCCTACAAGCGAGTTTGAACAGATGGAAGTTGAATTTATAGCGATGTGTATAGGCTTTCCGGTTAATCAGTTTAATTTCACGGAATCTATAAAAGATCGGACAGAGATGGAAATATTTGCAATCCGTCAATGTTTAAAAGAAATTCTAAGATTAGACAAGTTAGGGAAAGATTCTATTGAAAATAGACAGGTTGTGAAAGTTGAAGATATCACAATGAACATGAATTATACAGTTGATATCAAAGACGAATTAGCAAACGAAGTCAAAAAAATAGCGCGTTTAATGCGCTTGCCAGTACTTGATAATCTTTATGTTTCCTATGACGATGTAGAAGGGAAACTAGATGAA…	P005	465	NA	1	5843	6307
AND75493.1	5437	5766	1	hypothetical protein	MLKDFQTQGLLFDTWQTRQVLSNAVTDTMSQSVDIVGSRTPVRTGNLLIHWDSSQVVSTDLEGSVFNDTFYAAFVELGTSRFSGRFYLQRSLPEIEETFIETIIDSLGG	N1	ATGTTAAAAGATTTTCAGACACAAGGTTTGTTATTTGACACTTGGCAGACTAGGCAAGTGTTATCTAATGCCGTGACTGATACTATGAGTCAAAGCGTTGATATAGTAGGGTCTAGAACACCTGTTAGAACTGGTAATTTGCTGATTCATTGGGATTCATCACAAGTTGTGTCAACAGACTTGGAAGGTTCGGTTTTCAATGACACATTTTATGCAGCTTTTGTTGAGTTAGGTACATCTCGTTTTAGTGGTAGATTCTATTTACAGCGATCGCTACCTGAAATTGAAGAAACTTTCATCGAAACAATCATAGACTCTTTAGGGGGATAA	P006	330	NA	1	6307	6636
AND75494.1	5771	6184	1	hypothetical protein	MSLYSNLINVKQNVIGVREKLGDPRLKLLVFEFPKPPESDKYYIVTPKLKVSMSPKNLIGLPLDFKSNIIVSADDYYIEDVSRNVPEAALRTRAWLDPVFDSGGNITSGINCRCHVINNKSGLSYDLILRKEREVRI	N1	ATGAGTCTATATTCCAACCTTATAAATGTCAAACAGAATGTTATAGGTGTTCGTGAAAAATTAGGTGATCCGCGTTTAAAACTATTAGTATTTGAATTCCCCAAACCCCCGGAATCAGACAAATATTATATTGTAACACCTAAACTAAAAGTTTCGATGTCTCCTAAAAACTTAATAGGTTTGCCACTTGATTTTAAATCTAATATCATCGTTTCAGCCGATGATTATTATATTGAAGATGTTTCTCGTAATGTACCAGAAGCAGCTTTAAGAACTAGAGCATGGTTAGATCCTGTATTTGATTCCGGGGGGAACATAACATCTGGTATTAATTGTAGGTGTCATGTGATAAACAATAAATCAGGCTTATCTTATGATTTGATTTTAAGAAAAGAGAGG…	P007	414	NA	1	6641	7054
AND75495.1	6181	6900	1	hypothetical protein	MTKLSIIKSSILHYINSVMWLQERAIQEPLRSDVVVNTVRYPPNIIAEKPSKIDISFDSSKTGENQGVAQLLCNAEICFTVCWVFTREIYKTYHSVPRNQIEDLVSLCLQFVLTSPQGIDEDIISISAKPSQIVVKATEDVNSDPSNSSSWSVIADMSFQVEFISSPDEYSPVDFNKIQPATWDLLDDLDPITPEEPFTLNGLIINLYKSELPSVNTTNEETYQLEETLYIPSEIEDQI	N1	ATGACAAAACTCTCGATAATAAAATCAAGCATCTTACATTATATAAATTCAGTGATGTGGTTGCAAGAAAGAGCTATACAGGAACCATTAAGATCAGATGTTGTTGTAAACACTGTAAGATACCCGCCCAATATCATCGCTGAAAAGCCTTCAAAAATAGATATATCTTTTGATTCTTCAAAAACTGGTGAGAACCAAGGTGTTGCACAATTACTATGTAACGCTGAAATATGTTTCACAGTTTGTTGGGTTTTCACAAGAGAGATATATAAAACATATCATTCTGTCCCCCGGAATCAAATTGAAGATTTAGTATCATTGTGTCTACAATTCGTTTTAACTTCACCACAAGGTATAGACGAAGATATCATTTCTATATCCGCAAAGCCATCTCAAATT…	P008	720	NA	1	7051	7770
AND75496.1	6903	8423	1	tail sheath protein	MTNFLNGVNIGTPGAYAFIQQTQSRPINVEPFRTCYMVGFASNGAFKNVPKLVTSKTDFDNVFPSSASSNSVDLFFQNSQGFGNLYFINVAIPTKFQIVVNAATVGSYSVTINGVTKNITVAGGATTTTVAADVISAINTDTTLNKEVLAAIGGTSSTVTITSKKPTTTTTCSVTGVIFTLTIITTTAPTVSDYVYTIQNVFDPALEAGFVIAPEAFSTFTKNDRLSIQVALENLASGYRYQWAALIDSGAMSEISNTERAIAEAATYTSPQGHSSYYYPYLVNLNDQQVPPSAAVAGLALYRYVVDGFAEPPAGVAYPLKGVKDVAYKVTWNEQNVANPEGVNCILNKENYGIVVWGARTLSADPNIVFISTRVILNIIVNTLNRGYDFFIFNSVGGA…	N1	ATGACTAACTTTTTAAATGGTGTTAATATAGGCACACCGGGCGCTTATGCTTTTATACAACAAACACAAAGCAGACCTATCAACGTTGAACCATTCCGCACTTGTTACATGGTTGGTTTTGCCTCCAACGGTGCATTTAAAAACGTACCAAAACTAGTAACGAGTAAAACAGATTTTGACAACGTTTTCCCATCTTCCGCTAGTTCTAATAGTGTTGATTTGTTCTTTCAGAATAGCCAAGGCTTCGGTAATTTATATTTTATTAACGTTGCTATTCCTACCAAATTTCAAATAGTAGTAAATGCTGCTACTGTTGGAAGTTACTCTGTAACAATCAATGGTGTAACAAAAAATATAACCGTTGCTGGTGGTGCTACAACAACTACTGTAGCGGCTGAT…	P009	1521	NA	1	7773	9293
AND75497.1	8449	8946	1	tail tube protein	MPIKKPFNINSYQINLSVGSQSFTDFWVKCSKIEKTYGSSEYSDGQSNIVYNLPGAVKYSDVTLSKPFTPGDENMLKALIAVNSNPIDFVTASIQPMYRDGYYRVPQGGIIYLEFCTVGRVTPINEIDTGGSGVSMFEVQLYPGGIKSDGGNIQWWKEPEAQVAV	N1	ATGCCTATCAAAAAACCTTTCAACATAAATAGTTATCAGATAAACCTTTCAGTCGGTTCACAGTCTTTTACTGATTTTTGGGTGAAATGTTCAAAAATTGAAAAGACATATGGATCATCTGAATATTCTGATGGTCAATCAAACATTGTTTATAACTTGCCAGGTGCTGTAAAATACAGTGATGTCACATTATCTAAACCGTTTACACCAGGTGATGAAAATATGTTGAAGGCTTTAATAGCCGTTAACAGTAATCCTATTGATTTTGTAACAGCATCTATACAACCTATGTATAGAGACGGGTATTACAGAGTACCACAAGGTGGTATAATTTACTTGGAATTCTGCACAGTAGGCAGAGTAACACCCATCAATGAAATAGATACTGGTGGTAGTGGT…	P010	498	NA	1	9319	9816
AND75498.1	9008	9442	1	hypothetical protein	MKIKPTDVNTFADDSGEITPESDQQLEVTDTQQSKLIDLTVNEVVTPGGREAIAFVSPISGKNVVVLKPTTPDLIAIERTINKKHRDAGQFEQSIVYLSFLICEYGDKKGMKILSFENILNTFEPNEILGINGIANEFFRLGQI	N1	ATGAAAATCAAACCAACAGATGTAAACACTTTTGCAGATGATTCCGGTGAAATTACCCCGGAATCAGATCAACAACTTGAAGTAACAGACACACAACAAAGTAAATTAATTGATCTCACTGTCAATGAAGTTGTTACACCAGGTGGTAGAGAAGCGATCGCTTTCGTTTCGCCTATTTCTGGAAAAAACGTTGTGGTGTTGAAACCCACTACACCGGATTTAATAGCTATTGAAAGAACCATAAACAAAAAACATAGAGACGCTGGACAGTTTGAACAGTCCATAGTCTATCTATCATTTTTGATTTGCGAATATGGTGATAAAAAAGGAATGAAAATCTTAAGTTTTGAAAACATCCTAAATACTTTTGAACCTAACGAGATATTAGGAATCAACGGG…	P011	435	NA	1	9878	10312
AND75499.1	9414	9656	1	hypothetical protein	MNFFGSVRYDWDEESFLYADIELDFEHIKKCLLAACGGNFTETYFRMFNEFSTLKLFEHLKLYSDYQDEQEKYMKERQKT	N1	ATGAATTTTTTCGGCTCGGTCAGATATGATTGGGATGAAGAATCGTTTTTATATGCTGACATAGAATTAGATTTTGAACACATTAAAAAGTGCTTATTAGCCGCTTGTGGTGGCAATTTCACTGAAACATATTTCAGAATGTTTAATGAATTCAGCACTTTAAAATTATTTGAACATCTAAAACTATATTCAGACTATCAAGACGAACAAGAAAAATACATGAAAGAAAGACAAAAAACTTAA	P011	243	NA	1	10284	10526
AND75500.1	9720	11798	1	hypothetical protein	MANRQHVISVDLRLLTSGFDSSLNYIQGRINNVFGNVNNQAANGFFGSGGAFSNAAWMIAFNWIERAGVAAFRAIGSEINRSIEYQNNLISMATSYKGLLNLSTKDAMNLSRESNLIFQRRNAALPFAQYRGQMQAAYGDDFLSTFYDQNNVKGSLERTADMIGRTTVLLGSISGVTNYQRTNFLSSFLNNDLKKITMLEVFRNSPQLQRVFQQQVDAVGGEKEFNKMDRNSRTLLLENIATLAVDDDIINAYKNSLGGIFSRIGQQLFGDLGIFSFTRDLVFNLPNTSILSSLTFFFKEVFATDGVFGLVLPAIQGFVDTILISAKFLLDRTSFIFMALNAFARVLQPLAPLIYAASSALTVFAAVGIANTIRSAVQGALISSGASMLGGRMGMAAMF…	N1	ATGGCTAATAGACAACACGTAATTTCAGTTGACTTGAGATTACTAACAAGCGGCTTTGACTCATCTTTGAATTACATTCAAGGACGTATAAATAATGTCTTTGGAAATGTAAACAATCAAGCGGCTAACGGTTTTTTTGGATCGGGTGGTGCTTTCAGTAATGCAGCGTGGATGATAGCTTTTAATTGGATTGAAAGAGCGGGTGTAGCTGCTTTCAGAGCCATAGGAAGTGAAATCAACCGATCAATAGAATACCAAAACAATTTAATATCAATGGCAACTAGTTACAAAGGTTTGTTGAATCTTTCAACCAAAGACGCGATGAATCTTTCTAGAGAAAGTAATCTTATTTTTCAACGTCGTAACGCCGCTTTACCATTTGCACAATATAGAGGGCAA…	P013	2079	NA	1	10590	12668
AND75501.1	11978	12265	1	hypothetical protein	MPLRRGSTPRVNQTHKPISVFRHIAMIGNVAVQVFTAVLPMDGFLGILLFQSGDVSGLSVVLPGCPSDPRYLVNLSPHPYLYNIPILAEIHPYIH	N1	ATGCCACTACGTAGGGGTAGCACACCGAGAGTTAATCAAACTCACAAGCCGATTTCAGTTTTTCGACACATCGCCATGATCGGGAATGTAGCTGTTCAAGTTTTTACGGCTGTCTTACCGATGGACGGTTTTTTGGGAATTCTACTGTTTCAATCTGGGGATGTATCCGGTCTTAGTGTCGTATTACCGGGCTGTCCATCAGATCCGAGGTACTTGGTTAACCTCTCCCCTCATCCATATTTATATAATATCCCGATTTTAGCTGAAATACATCCGTATATACACTGA	P128	288	NA	1	12848	13135
AND75502.1	12339	15032	-1	lysozyme	MQDPIIKIIIGNDSFILGSELLSLSFSLGEGKKQNSCQFSIHDRDGFWANKFISSSYAQGGIDLPVDFLSDPNDPPNSETPSSATSIDSGGNGAVSRGGVFNAKVLAFLDTIASKEAAPGASLSLDGYRSVSGETTLFSENYLAQSGFPQFTNKNIGRYQFTIVDYNHAKKSDSTINNFSPRNQDKIAYFKLGYRGVLPYLLRDDIDNAIDRASREWASFPGIGKPQGQFNQVQPGTTIASLKAYYETRLAYYRSLETQSDVQASKPKDTSNNQYSGSDYKVVKVLSNSTQASFYGLGDGFNGKKTANGEIFNANGISAAHESLPFGSLVRVTWLNNNNSVVVRINDRGNFVRLGRQIDLSYGAALALSTPGNDAIATGVLNVKLELVELTTPANTNIK…	N1	ATGCAAGATCCTATTATTAAAATAATCATAGGCAACGACTCTTTCATACTTGGAAGTGAATTATTATCACTATCATTTTCTTTAGGTGAGGGTAAGAAACAGAATAGTTGTCAATTTTCAATACATGATAGGGATGGTTTTTGGGCTAATAAATTTATCTCGTCTTCTTATGCTCAAGGTGGTATTGATCTACCTGTAGATTTTTTATCAGATCCGAACGATCCTCCTAATTCTGAAACTCCATCCTCAGCAACTTCTATTGATTCCGGGGGGAATGGTGCTGTAAGTAGAGGGGGAGTTTTCAATGCAAAAGTTTTAGCGTTTCTGGACACTATCGCATCCAAAGAAGCTGCGCCGGGTGCTAGTTTATCGCTTGATGGCTATAGAAGTGTTTCAGGT…	P015	2694	NA	-1	13209	15902
AND75503.1	15035	15502	-1	hypothetical protein	MSTQEFVSKNKTIESEILDLLIKPNVDDSILTRNQQAIADKDLFKVEWEPGQSLNKLATEYIGDSFAWQIIADANGIDPTAPIDIGKGLKIPTQAALEKSIKKFIVNSPQGKQLISDAKQSILNLVGVGDNNSEFSKTLKECINKVVNFKFDNTQ	N1	ATGTCCACCCAAGAATTTGTAAGCAAAAATAAAACTATCGAATCTGAGATATTGGATCTACTGATCAAACCTAATGTTGATGATAGCATTCTCACCCGGAATCAACAAGCGATCGCTGACAAAGATTTGTTCAAAGTTGAATGGGAGCCGGGGCAATCTTTGAACAAACTTGCAACTGAATACATAGGAGATTCATTTGCTTGGCAGATAATAGCTGATGCCAACGGAATAGACCCAACAGCGCCAATAGATATAGGCAAAGGATTAAAGATACCAACACAAGCAGCGCTCGAAAAGTCTATCAAGAAATTTATAGTTAATTCTCCGCAAGGTAAACAACTGATTAGCGATGCTAAACAAAGTATTCTAAATCTTGTTGGTGTTGGTGATAATAATTCT…	P016	468	NA	-1	15905	16372
AND75504.1	15503	15796	1	hypothetical protein	MKNDDFEERNRKAVERGIEILNDNLSIKNKFTHVGREVVISNDIYCIDAYDNIEDQYFLNMCIESRQAKKDILCFTSGWVSGNMFRKRLIEGDIFIV	N1	ATGAAAAATGATGATTTTGAAGAAAGAAATAGAAAAGCCGTAGAACGTGGCATAGAGATATTAAACGATAATTTATCAATTAAAAACAAATTCACTCATGTTGGTAGGGAAGTCGTAATATCCAATGATATTTACTGTATAGACGCATATGATAATATAGAAGATCAGTATTTTTTGAATATGTGCATAGAATCTAGACAGGCAAAAAAAGATATACTATGCTTTACATCTGGTTGGGTATCAGGCAATATGTTTAGAAAAAGGTTGATAGAGGGTGACATATTTATTGTCTAG	P129	294	NA	1	16373	16666
AND75505.1	15786	16634	-1	hypothetical protein	MSSFLKNKKVLEGLNTLSKPGSYQHCFLIEYIDNTNNRATATENKNKLAQGFPVYQFLYNPETISLTLPISYQEIAIPFTGINQVNYSNGGNITMNLNNLILDTMNENKSLQPLIDKLISLREPTVKTGLKSHPKILYFKWGSNTFGTCVLTNVSFDITRWNDGFPVKARMSMSLKEVPKPVGDSKAIQEAKKKVKEETVQNGNLKKGLTEKQILDGQKVIREYFKKNLSFQPKRVQDVLNNPKSIIKIDKDTGQVSLYDASGEFVQLLGNYNGDTFTPTRQ	N1	ATGTCAAGTTTTTTAAAAAATAAAAAAGTTTTAGAAGGCTTGAACACGCTTTCAAAACCTGGAAGCTATCAGCATTGCTTTTTAATTGAATATATCGATAACACTAACAACCGCGCTACAGCAACGGAGAACAAAAATAAACTTGCTCAAGGGTTCCCAGTTTACCAATTTTTGTACAACCCTGAGACAATCTCTTTAACACTTCCCATCAGCTATCAAGAGATTGCAATTCCGTTCACCGGAATCAACCAAGTTAATTATAGCAATGGTGGTAATATCACCATGAATTTGAACAATCTCATTCTAGACACGATGAATGAGAATAAGAGCTTGCAACCGCTTATAGATAAGTTGATATCTTTACGAGAACCGACAGTAAAAACGGGTTTAAAGTCTCAC…	P018	849	NA	-1	16656	17504
AND75506.1	17246	18160	1	exonuclease RNase T and DNA polymerase	MITIVFPRNQNMSIDKRNQAIANINDSLTSGNAVFLDTETIGGFDNPVMIELAITDIEKNKLFDNYVFPWYIPDSFKLQNGCDWVEVQQAYDFESHYQNIKDILKDKDIYIYNKSFDIRVFEKVCEFYQLPLPLDVKRVHCLMSYYKAITGDLKPLKGDHTAFGDVCVMSDLFKELATYEPIELMVNDDNIADTIKQYQEICNQIKDLEAYKKLYSDRIKQHILKDVGLGDKTTVEIKTPAETIKVSGRVDIVAKIDNPLEVPEKYFKTTFDRFLAAKDFIDSGEITPGITYERSEVLGKIVIS	N1	ATGATCACCATAGTTTTTCCCCGAAATCAAAATATGAGCATTGATAAACGTAACCAAGCGATCGCAAACATTAACGACTCTTTAACATCTGGTAACGCTGTTTTTCTGGACACAGAAACCATCGGCGGTTTTGACAACCCGGTCATGATCGAACTCGCTATAACTGATATTGAAAAAAATAAACTATTTGACAATTATGTTTTTCCGTGGTATATACCTGATAGTTTTAAATTACAAAATGGTTGTGACTGGGTAGAAGTACAACAAGCTTATGATTTTGAAAGTCACTATCAAAACATCAAAGATATTTTAAAAGACAAAGATATTTACATCTACAACAAGAGTTTTGATATTCGCGTATTTGAAAAAGTATGCGAGTTTTATCAGTTACCTCTACCA…	P022	915	NA	1	18116	19030
AND75507.1	18272	18496	-1	hypothetical protein	MNIIKAFKHWKEGKRFNRLIGVYNSLGMRIVRITNSQNDYALYDVYYIKDDEYLFSCDIRTLETWVNSSWLKLF	N1	ATGAACATAATTAAAGCTTTTAAACACTGGAAAGAAGGCAAACGTTTTAACAGACTAATAGGTGTTTACAATTCGTTGGGTATGCGTATCGTCAGAATAACGAACTCACAAAACGATTACGCTTTGTATGATGTTTATTATATAAAAGACGATGAATACCTTTTTAGCTGTGATATTAGGACACTAGAAACTTGGGTAAATAGTAGTTGGTTAAAATTATTTTAA	P130	225	NA	-1	19142	19366
AND75508.1	18483	18707	-1	hypothetical protein	MRFWKTLQNFCEYVRFKLLSKPCSVLGLKIVRQYSGIFGNYYYQIYKGDEKVLLGNINVVEEYIRISKKLYEHN	N1	ATGAGATTTTGGAAAACATTGCAAAATTTTTGTGAATATGTGCGTTTCAAATTACTTTCAAAACCTTGCAGTGTTTTAGGTCTGAAAATTGTTAGACAATATTCCGGTATTTTTGGTAATTATTATTATCAAATTTACAAAGGTGATGAAAAAGTTTTGCTAGGTAATATCAATGTAGTGGAAGAGTATATCAGAATATCAAAGAAATTATATGAACATAATTAA	P131	225	NA	-1	19353	19577
AND75509.1	18704	18883	-1	hypothetical protein	MKSTAKNIQRLRKALLEHELQLAITVSGYAALFNGNVIFDGVNLQEISDKLNLYNIGGL	N1	ATGAAATCCACAGCAAAAAACATTCAACGACTACGCAAAGCGCTGTTAGAACATGAACTTCAATTAGCAATTACTGTTAGTGGTTATGCGGCGCTATTTAACGGTAATGTGATTTTCGACGGCGTTAATTTGCAAGAAATATCTGATAAACTCAATTTGTATAACATAGGTGGTTTATGA	P020	180	NA	-1	19574	19753
[truncated: 489 more rows]

## Sheet:  Table S8
Supplementary Table S8. Genomic isomers identified in cyanophages in this study.
Nucleotide	Phage name	% identity	alignment length	mismatches	gap opens	Isomer1_start	Isomer1_end	Isomer2_start	Isomer2_end	evalue	bit score	distance
[truncated: 36 more rows]
